# Supplementary material for: Evolution and lineage dynamics of a transmissible cancer in Tasmanian devils
Source: PubMed Central journal article supplement (PMC7685465; doi:10.1371/journal.pbio.3000926), 2020-11-24
Supplement: pbio.3000926.s001.pdf [file pbio.3000926.s001.pdf]

Figure S1

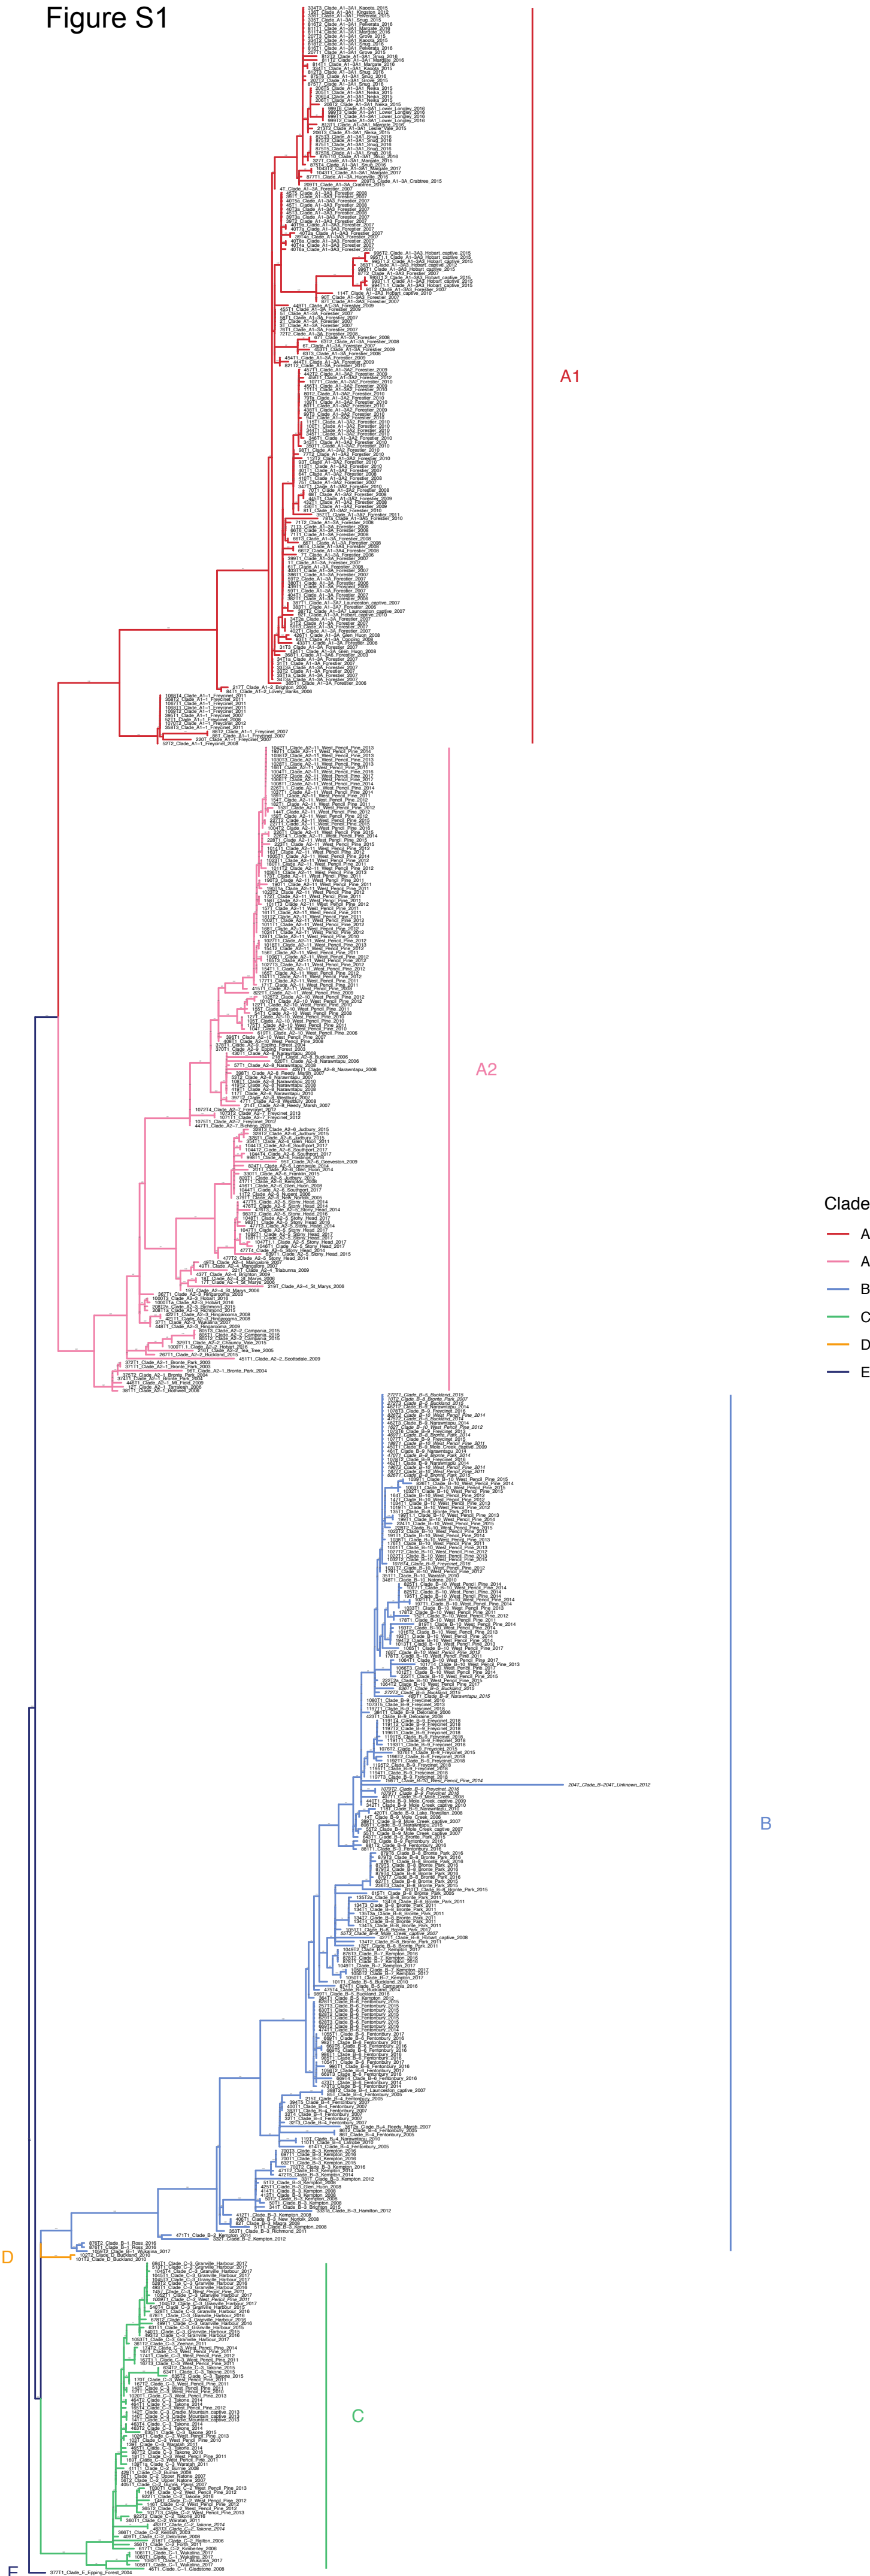

Clade  
A1  
A2  
B  
C  
D  
E
