# Supplementary material for: Evolution and lineage dynamics of a transmissible cancer in Tasmanian devils
Source: PubMed Central journal article supplement (PMC7685465; doi:10.1371/journal.pbio.3000926), 2020-11-24

# Figure S9A

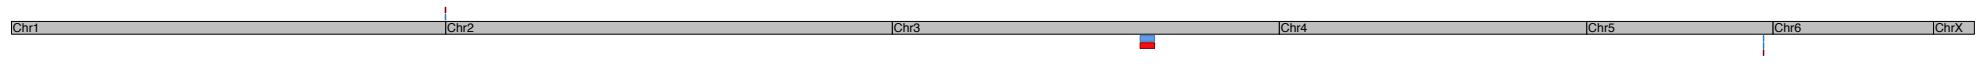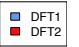

# Figure S9B

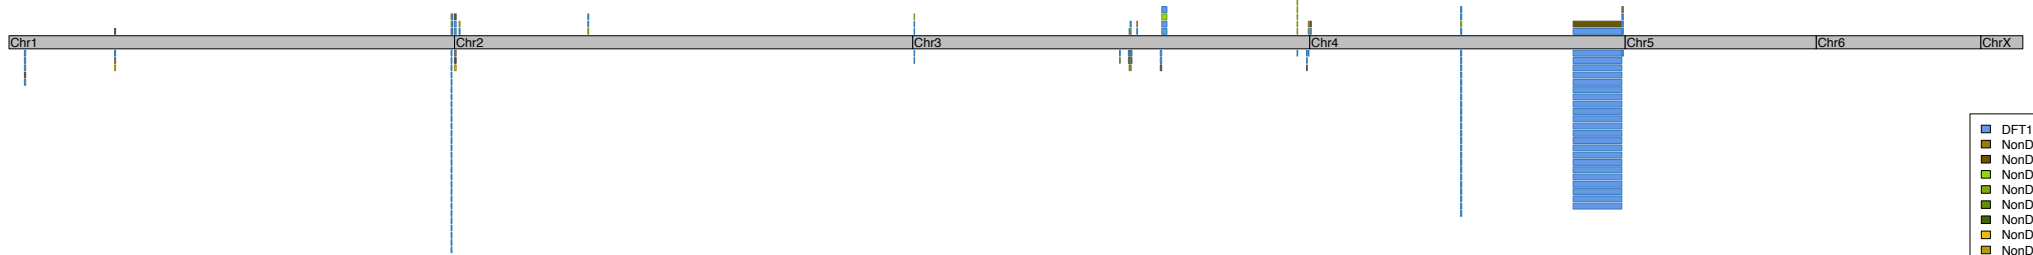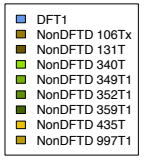

# Figure S9C

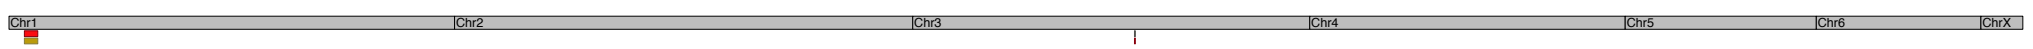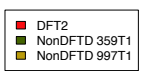

Supplement: pbio.3000926.s009.pdf [file pbio.3000926.s009.pdf]
