# Supplementary material for: Evolution and lineage dynamics of a transmissible cancer in Tasmanian devils
Source: PLoS Biol. 2020 Nov 24;18(11):e3000926. doi: 10.1371/journal.pbio.3000926 (PMC7685465; doi:10.1371/journal.pbio.3000926)
Supplement: S1 Table — (A) Tumour sample information. Identifiers and metadata are listed for DFT1, DFT2, and non-DFTD tumours (non-DFTD refers to tumours which are neither DFT1 nor DFT2). Each row refers to a single tumour, with multiple samples from the same individual devil linked by a common individual ID and a digit following the “T,” e.g., 31T1 and 31T2 are two tumours sampled from the same host. Further information on devils with multiple tumours can be found in S4 Table. In some cases, “T1” and “T2” refer to the same tumour sampled twice, either at the same or different time points; these are labelled as “duplicate DNA extraction from the same tumour” (same time point) or “Time-course” (different time points). Cell line samples are also labelled “T,” and samples from the same cell line collected at the same or at different passages are labelled “T1” and “T2,” with those collected at the same time point labelled “Duplicate cell pellet.” In addition, the following group of cell lines and experimental transmissions all derive from the same parental cell line (87T, 87T2, 90T, 90T2, 114T, 363T1, 993T1.1, 993T1.2, 994T1.1, 995T1.1, 995T1.2, 996T1, 996T2). Cell lines used in the study are also known by the following external identifiers: 85T (Half-Pea); 86T, 86T2 (1426); 87T, 87T2, 90T, 90T2, 114T, 363T1, 993T1.1, 993T1.2, 994T1.1, 995T1.1, 995T1.2, 996T1, 996T2 (C5065); 88T, 88T2 (4906); 204T (Ed); 202T2 (RV, TD467); 203T3 (SN, TD500). “Matched” and “unmatched” refer to availability of host (see (B)). Clade and clade group (S1 Fig) are listed for each tumour, as well as mitochondrial haplotype group and genotype (S1 Fig and S2 Table). Tumour purity estimates from copy number analysis, MIP genotyping, and mitochondrial analysis are shown. Tumour data, including sampling location, latitude, longitude, date of sampling, host age, and sex (M, male; F, female), are provided. “Singleton” and “multiple” denote individuals from which either a single tumour or multiple tumours were sampled as pa [file pbio.3000926.s013.xlsx]

## Sheet: Table_S1A
Individual_ID	Sample_ID	LIMS_ID	Microchip	Matched_Unmatched	Clade	Clade group	Haplogroup	Complete haplotype	Mitochondrial variants	Location	Latitude	Longitude	Year of sampling	Complete date (dd/mm/yyyy) of sampling	Cancer type	Tissue or cell line	Experimental transmission	Included in tree (Figure 1A, Figure S1)	Included in geographic analysis (Figures 1B, 1C, 1D, S2)	Body location (general)	Body location (specific)	Metastasis	Non-DFTD tumour diagnosis	Singleton or multiple	Duplicate or time course biopsy	Purity (CNV)	Purity (MIPs)	Purity (mtDNA)	Purity (mean CNV and MIPs)	MIPs available	CNVs available	Host sex	Host age at time of tumour sampling (years)	Tumour strain	M5 loss	Tetraploid	Total_CNVs.all_copynumbers	Total_gains.all_copynumbers	Total_losses.all_copynumbers	CNV_string.all_copynumbers	Total_CNVs_linked.all_copynumbers	Total_CNVs_linked_gains.all_copynumbers	Total_CNVs_linked_losses.all_copynumbers	CNV_string_linked.all_copynumbers	Total_genome_affected.all_copynumbers	Total_genome_affected_gain.all_copynumbers	Total_genome_affected_loss.all_copynumbers	Genome_size_change.all_copynumbers	Total_CNVs.clonal_copynumbers_only
1	1T	'07/0317	'982009102430562	Matched	Clade_A1	Clade_A1-3A	DFT1_3	DFT1_3A	1828A>G;3255G>A	Forestier	-42.902220999999997	147.83382900000001	2007	30/01/2007	DFT1	Tissue	No	Yes	Yes	Unknown				Singleton		0.91800000000000004	0.92200000000000004	0.92500000000000004	0.92	Yes	Yes	F	2	Strain 3			17	9	8	1R1_2R1_3R1_4R1_5_6_7_8_9_10R1_11_12_13_15_19_23_24	4	1	3	1R1-7-8|2R1-3R1-5-6-9-10R1-11-15-19|4R1-12-13|23-24	276200000	159900000	116300000	43600000	17
2	2T	'07/0319	'982009100773235	Matched	Clade_A1	Clade_A1-3A	DFT1_3	DFT1_3A	1828A>G;3255G>A	Forestier	-42.902220999999997	147.83382900000001	2007	30/01/2007	DFT1	Tissue	No	Yes	Yes	Facial/oral				Singleton		0.90900000000000003	0.94199999999999995	0.89900000000000002	0.92549999999999999	Yes	Yes	M	2	Strain 3			18	9	9	1R1_2R1_3R1_4R1_5_6_7_8_9_10R1_11_12_13_15_19_23_24_33	5	1	4	1R1-7-8|2R1-3R1-5-6-9-10R1-11-15-19|4R1-12-13|23-24|33	277900000	159900000	118000000	41900000	18
3	3T	'07/0304	'982009100864506	Matched	Clade_A1	Clade_A1-3A	DFT1_3	DFT1_3A	1828A>G;3255G>A	Forestier	-42.902220999999997	147.83382900000001	2007	29/01/2007	DFT1	Tissue	No	Yes	Yes	Facial/oral				Singleton		0.86899999999999999	0.88500000000000001	0.91100000000000003	0.877	Yes	Yes	F	2	Strain 3			18	9	9	1R1_2R1_3R1_4R1_5_6_7_8_9_10R1_11_12_13_15_19_23_24_33	5	1	4	1R1-7-8|2R1-3R1-5-6-9-10R1-11-15-19|4R1-12-13|23-24|33	277900000	159900000	118000000	41900000	18
4	4T	'07/0305	'982009100866164	Matched	Clade_A1	Clade_A1-3A	Unknown	Unknown	Unknown	Forestier	-42.902220999999997	147.83382900000001	2007	27/01/2007	DFT1	Tissue	No	Yes	Yes	Unknown				Singleton		Not Available	0.875	Not Available	0.875	Yes	No	F	2	Strain 3	No data
5	5T	'07/0306	'982009104239392	Matched	Clade_A1	Clade_A1-3A	DFT1_3	DFT1_3A	1828A>G;3255G>A	Forestier	-42.902220999999997	147.83382900000001	2007	29/01/2007	DFT1	Tissue	No	Yes	Yes	Facial/oral				Singleton		0.93	0.90900000000000003	0.93300000000000005	0.91949999999999998	Yes	Yes	M	2	Strain 3	M5 loss		23	9	14	1R1_2R1_3R1_4R1_5_6_6BM2_7_8_9_10R1_11_11BM2_12_13_15_16R2_17R2_18R2_19_23_24_33	6	1	5	1R1-7-8|2R1-3R1-5-6-9-10R1-11-15-19|4R1-12-13|6BM2-11BM2-16R2-17R2-18R2|23-24|33	286107000	159900000	126207000	33693000	16
6	6T	'07/0316	'982009102521579	Matched	Clade_A1	Clade_A1-3A	Unknown	Unknown	Unknown	Forestier	-42.902220999999997	147.83382900000001	2007	30/01/2007	DFT1	Tissue	No	Yes	Yes	Unknown				Singleton		Not Available	0.69799999999999995	Not Available	0.69799999999999995	Yes	No	M	3	Strain 3	No data
7	7T	'06/3320	'982009104239476	Matched	Clade_A1	Clade_A1-3A	Unknown	Unknown	Unknown	Forestier	-42.902220999999997	147.83382900000001	2006	23/11/2006	DFT1	Tissue	No	Yes	Yes	Unknown				Singleton		Not Available	0.754	0.41399999999999998	0.754	Yes	No	F	3	No data	No data
8	8T2	'07/0486	'982009104869208	Matched	Clade_A2	Clade_A2-11	DFT1_0	DFT1_0	Novariants	West Pencil Pine	-41.717464999999997	145.85587000000001	2007	12/02/2007	DFT1	Tissue	No	No (missing data)	Yes	Unknown				Singleton		0.876	Not Available	Not Available	0.876	No	Yes	F	4	Strain 1 tetraploid	M5 loss		23	9	14	1R1_2R1_3R1_4R1_5_6_6BM17_7_8_9_10R1_11_11BM17_12_13_15_16R17_17R17_18R17_19_22_26_27R1	6	1	5	1R1-7-8|2R1-3R1-5-6-9-10R1-11-15-19|4R1-12-13|6BM17-11BM17-16R17-17R17-18R17|22|26-27R1	250307000	159900000	90407000	69493000	23
9	9T	'07/0487	'982009104968776	Matched	Clade_A2	Clade_A2-11	DFT1_0	DFT1_0	Novariants	West Pencil Pine	-41.717464999999997	145.85587000000001	2007	12/02/2007	DFT1	Tissue	No	No (missing data)	Yes	Unknown				Multiple		0.95199999999999996	0.95699999999999996	Not Available	0.95450000000000002	No	Yes	F	5	Strain 1	M5 loss		23	9	14	1R1_2R1_3R1_4R1_5_6_6BM17_7_8_9_10R1_11_11BM17_12_13_15_16R17_17R17_18R17_19_22_26_27R1	6	1	5	1R1-7-8|2R1-3R1-5-6-9-10R1-11-15-19|4R1-12-13|6BM17-11BM17-16R17-17R17-18R17|22|26-27R1	250307000	159900000	90407000	69493000	23
9	9T2	'07/0487	'982009104968776	Matched	Clade_A2	Clade_A2-11	DFT1_0	DFT1_0	Novariants	West Pencil Pine	-41.717464999999997	145.85587000000001	2007	12/02/2007	DFT1	Tissue	No	No (duplicate)	No (duplicate)	Unknown				Multiple	Duplicate DNA extraction from same tumour	0.91800000000000004	Not Available	Not Available	0.91800000000000004	No	Yes	F	5	Strain 1	M5 loss		23	9	14	1R1_2R1_3R1_4R1_5_6_6BM17_7_8_9_10R1_11_11BM17_12_13_15_16R17_17R17_18R17_19_22_26_27R1	6	1	5	1R1-7-8|2R1-3R1-5-6-9-10R1-11-15-19|4R1-12-13|6BM17-11BM17-16R17-17R17-18R17|22|26-27R1	250307000	159900000	90407000	69493000	23
10	10T2	'07/0500	'982009100662150	Unmatched	Clade_B	Clade_B-8	DFT1_2	DFT1_2	14114C>T	Bronte Park	-42.124875000000003	146.46679	2007	13/02/2007	DFT1	Tissue	No	Yes (italicised)	Yes	Facial/oral				Singleton		0.71499999999999997	Not Available	0.83299999999999996	0.71499999999999997	No	Yes	M	2	Strain 2			18	9	9	1R1_2R1_3R1_4R1_5_6_7_8_9_10R1_11_12_13_15_19_20R1_21R1_25	6	1	5	1R1-7-8|2R1-3R1-5-6-9-10R1-11-15-19|4R1-12-13|20R1|21R1|25	225000000	159900000	65100000	94800000	18
11	11T1	Unknown	Unknown	Matched	Clade_A2	Clade_A2-6	DFT1_6	DFT1_6	3161G>A	Nugent	-42.721926000000003	147.74139600000001	2006	09/09/2006	DFT1	Tissue	No	No (duplicate)	No (duplicate)	Facial/oral	Palate			Multiple	Duplicate DNA extraction from same tumour	0.85399999999999998	0.873	0.88400000000000001	0.86350000000000005	Yes	Yes	F	1	No data (confirmed)			18	9	9	1R1_2R1_3R1_4R1_5_6_7_8_9_10R1_11_12_13_15_19_22_26_27R1	5	1	4	1R1-7-8|2R1-3R1-5-6-9-10R1-11-15-19|4R1-12-13|22|26-27R1	242100000	159900000	82200000	77700000	18
11	11T2	Unknown	Unknown	Matched	Clade_A2	Clade_A2-6	DFT1_6	DFT1_6	3161G>A	Nugent	-42.721926000000003	147.74139600000001	2006	09/09/2006	DFT1	Tissue	No	Yes	Yes	Facial/oral	Palate			Multiple		0.83799999999999997	0.81299999999999994	0.89500000000000002	0.82550000000000001	Yes	Yes	F	1	No data (confirmed)			18	9	9	1R1_2R1_3R1_4R1_5_6_7_8_9_10R1_11_12_13_15_19_22_26_27R1	5	1	4	1R1-7-8|2R1-3R1-5-6-9-10R1-11-15-19|4R1-12-13|22|26-27R1	242100000	159900000	82200000	77700000	18
12	12T	Unknown	Unknown	Matched	Clade_A2	Clade_A2-1	DFT1_8	DFT1_8	2942C>T	Tarraleah	-42.294359999999998	146.44213099999999	2006	11/01/2006	DFT1	Tissue	No	Yes	Yes	Facial/oral	Snout (inner)			Multiple		0.78800000000000003	0.73899999999999999	0.77	0.76349999999999996	Yes	Yes	M	1	No data (confirmed)	M5 loss		23	9	14	1R1_2R1_3R1_4R1_5_6_6BM7_7_8_9_10R1_11_11BM7_12_13_15_16R7_17R7_18R7_19_88_95_170R1	5	1	4	1R1-7-8|2R1-3R1-5-6-9-10R1-11-15-19|4R1-12-13|6BM7-11BM7-16R7-17R7-18R7-88-95|170R1	221707000	159900000	61807000	98093000	23
12	12Ta	Unknown	Unknown	Matched	Clade_A2	Clade_A2-1	DFT1_8	DFT1_8	2942C>T	Tarraleah	-42.294359999999998	146.44213099999999	2006	11/01/2006	DFT1	Tissue	No	No (duplicate)	No (duplicate)	Facial/oral	Snout			Multiple	Duplicate DNA extraction from same tumour	0.82199999999999995	0.83099999999999996	0.84199999999999997	0.82650000000000001	Yes	Yes	M	1	No data (confirmed)	M5 loss		23	9	14	1R1_2R1_3R1_4R1_5_6_6BM7_7_8_9_10R1_11_11BM7_12_13_15_16R7_17R7_18R7_19_88_95_170R1	5	1	4	1R1-7-8|2R1-3R1-5-6-9-10R1-11-15-19|4R1-12-13|6BM7-11BM7-16R7-17R7-18R7-88-95|170R1	221707000	159900000	61807000	98093000	23
12	12Tb	Unknown	Unknown	Matched	Clade_A2	Clade_A2-1	DFT1_8	DFT1_8	2942C>T	Tarraleah	-42.294359999999998	146.44213099999999	2006	11/01/2006	DFT1	Tissue	No	No (duplicate)	No (duplicate)	Facial/oral	Snout			Multiple	Duplicate DNA extraction from same tumour	0.81	0.73299999999999998	0.77500000000000002	0.77149999999999996	Yes	Yes	M	1	No data (confirmed)	M5 loss		23	9	14	1R1_2R1_3R1_4R1_5_6_6BM7_7_8_9_10R1_11_11BM7_12_13_15_16R7_17R7_18R7_19_88_95_170R1	5	1	4	1R1-7-8|2R1-3R1-5-6-9-10R1-11-15-19|4R1-12-13|6BM7-11BM7-16R7-17R7-18R7-88-95|170R1	221707000	159900000	61807000	98093000	23
14	14T	Unknown	Unknown	Matched	Clade_B	Clade_B-9	DFT1_2	DFT1_2	14114C>T	Mole Creek	-41.561492999999999	146.401814	2006	24/09/2006	DFT1	Tissue	No	Yes	Yes	Unknown				Singleton		0.34599999999999997	0.37	0.33200000000000002	0.35799999999999998	Yes	Yes	M	Unknown	No data (confirmed)			18	9	9	1R1_2R1_3R1_4R1_5_6_7_8_9_10R1_11_12_13_15_19_20R1_21R1_25	6	1	5	1R1-7-8|2R1-3R1-5-6-9-10R1-11-15-19|4R1-12-13|20R1|21R1|25	225000000	159900000	65100000	94800000	18
17	17T	Unknown	Unknown	Matched	Clade_A2	Clade_A2-4	DFT1_28	DFT1_28A	3161G>A;6477G>A	St Marys	-41.588864000000001	148.182413	2006	25/09/2006	DFT1	Tissue	No	Yes	Yes	Unknown				Singleton		0.74399999999999999	0.88800000000000001	0.89800000000000002	0.81599999999999995	No	Yes	M	Unknown	No data (confirmed)	M5 loss	Tetraploid (2)	26	11	15	1R1_2R1_3R1_4R1_5_6_6BM12_7_8_9_10R1_11_11BM12_12_13_15_16R12_17R12_18R12_19_22_26_27R1_28R3_28R3G1CN4_118	7	2	5	1R1-7-8|2R1-3R1-5-6-9-10R1-11-15-19|4R1-12-13|6BM12-11BM12-16R12-17R12-18R12-118|22|26-27R1|28R3-28R3G1CN4	253207000	162300000	90907000	71393000
18	18T	'06/2772	Unknown	Matched	Clade_A2	Clade_A2-4	DFT1_28	DFT1_28A	3161G>A;6477G>A	St Marys	-41.588864000000001	148.182413	2006	26/06/2006	DFT1	Tissue	No	Yes	Yes	Unknown				Singleton		0.80700000000000005	0.78400000000000003	0.92400000000000004	0.79549999999999998	Yes	Yes	M	Unknown	Strain 1 tetraploid	M5 loss	Tetraploid (2)	26	11	15	1R1_2R1_3R1_4R1_5_6_6BM12_7_8_9_10R1_11_11BM12_12_13_15_16R12_17R12_18R12_19_22_26_27R1_28R3_28R3G1CN4_118	7	2	5	1R1-7-8|2R1-3R1-5-6-9-10R1-11-15-19|4R1-12-13|6BM12-11BM12-16R12-17R12-18R12-118|22|26-27R1|28R3-28R3G1CN4	253207000	162300000	90907000	71393000
19	19T	'06/2891	'982009100818962	Matched	Clade_A2	Clade_A2-4	DFT1_0	DFT1_0	Novariants	St Marys	-41.588864000000001	148.182413	2006	10/06/2006	DFT1	Tissue	No	Yes	Yes	Unknown				Singleton		0.77500000000000002	0.56399999999999995	Not Available	0.66949999999999998	Yes	No	M	3	Strain 1 evolved tetraploid	No data	Tetraploid (2)
31	31T1	'07/2320	'982009100758259	Matched	Clade_A1	Clade_A1-3A	DFT1_3	DFT1_3A	1828A>G;3255G>A	Forestier	-42.902220999999997	147.83382900000001	2007	25/07/2007	DFT1	Tissue	No	Yes	Yes	Facial/oral	Lower mandible			Multiple		0.92200000000000004	Not Available	0.92900000000000005	0.92200000000000004	No	Yes	M	2	Strain 3			17	9	8	1R1_2R1_3R1_4R1_5_6_7_8_9_10R1_11_12_13_15_19_23_24	4	1	3	1R1-7-8|2R1-3R1-5-6-9-10R1-11-15-19|4R1-12-13|23-24	276200000	159900000	116300000	43600000	17
31	31T2	'07/2320	'982009100758259	Matched	Clade_A1	Clade_A1-3A	DFT1_3	DFT1_3A	1828A>G;3255G>A	Forestier	-42.902220999999997	147.83382900000001	2007	25/07/2007	DFT1	Tissue	No	Yes	Yes	Unknown				Multiple		0.93300000000000005	Not Available	0.93799999999999994	0.93300000000000005	No	Yes	M	2	Strain 3			18	9	9	1R1_2R1_3R1_4R1_5_6_7_8_9_10R1_11_12_13_15_19_23_24_207	5	1	4	1R1-7-8|2R1-3R1-5-6-9-10R1-11-15-19|4R1-12-13|23-24|207	277200000	159900000	117300000	42600000	18
31	31T3	'07/2320	'982009100758259	Matched	Clade_A1	Clade_A1-3A	DFT1_3	DFT1_3A	1828A>G;3255G>A	Forestier	-42.902220999999997	147.83382900000001	2007	25/07/2007	DFT1	Tissue	No	Yes	Yes	Unknown				Multiple		0.86299999999999999	Not Available	0.88300000000000001	0.86299999999999999	No	Yes	M	2	Strain 3			17	9	8	1R1_2R1_3R1_4R1_5_6_7_8_9_10R1_11_12_13_15_19_23_24	4	1	3	1R1-7-8|2R1-3R1-5-6-9-10R1-11-15-19|4R1-12-13|23-24	276200000	159900000	116300000	43600000	17
32	32T1	'07/1315	'982009100818058	Matched	Clade_B	Clade_B-4	DFT1_4	DFT1_4	7198T>C	Fentonbury	-42.653722000000002	146.76054099999999	2007	30/04/2007	DFT1	Tissue	No	Yes	Yes	Facial/oral				Multiple		0.90700000000000003	Not Available	0.90100000000000002	0.90700000000000003	No	Yes	F	3	No data			17	9	8	1R1_2R1_3R1_4R1_5_6_7_8_9_10R1_11_12_13_15_19_20R1_25	5	1	4	1R1-7-8|2R1-3R1-5-6-9-10R1-11-15-19|4R1-12-13|20R1|25	212500000	159900000	52600000	107300000	17
32	32T3	'07/1315	'982009100818058	Matched	Clade_B	Clade_B-4	DFT1_4	DFT1_4	7198T>C	Fentonbury	-42.653722000000002	146.76054099999999	2007	30/04/2007	DFT1	Tissue	No	Yes	Yes	Facial/oral				Multiple		0.69399999999999995	Not Available	0.74199999999999999	0.69399999999999995	No	Yes	F	3	No data			18	10	8	1R1_2R1_3R1_4R1_5_6_7_8_9_10R1_11_12_13_15_19_20R1_25_1802	6	2	4	1R1-7-8|2R1-3R1-5-6-9-10R1-11-15-19|4R1-12-13|20R1|25|1802	213500000	160900000	52600000	108300000	17
32	32T4	'07/1315	'982009100818058	Matched	Clade_B	Clade_B-4	DFT1_4	DFT1_4	7198T>C	Fentonbury	-42.653722000000002	146.76054099999999	2007	30/04/2007	DFT1	Tissue	No	Yes	Yes	Facial/oral				Multiple		0.871	Not Available	0.89700000000000002	0.871	No	Yes	F	3	No data			17	9	8	1R1_2R1_3R1_4R1_5_6_7_8_9_10R1_11_12_13_15_19_20R1_25	5	1	4	1R1-7-8|2R1-3R1-5-6-9-10R1-11-15-19|4R1-12-13|20R1|25	212500000	159900000	52600000	107300000	17
33	33T1a	'07/2296	'982009102737669	Matched	Clade_A1	Clade_A1-3A	DFT1_3	DFT1_3A	1828A>G;3255G>A	Forestier	-42.902220999999997	147.83382900000001	2007	23/07/2007	DFT1	Tissue	No	Yes	Yes	Unknown				Multiple		0.95499999999999996	Not Available	0.97199999999999998	0.95499999999999996	No	Yes	M	3	Strain 3			17	9	8	1R1_2R1_3R1_4R1_5_6_7_8_9_10R1_11_12_13_15_19_23_24	4	1	3	1R1-7-8|2R1-3R1-5-6-9-10R1-11-15-19|4R1-12-13|23-24	276200000	159900000	116300000	43600000	17
33	33T2	'07/2296	'982009102737669	Matched	Clade_A1	Clade_A1-3A	DFT1_3	DFT1_3A	1828A>G;3255G>A	Forestier	-42.902220999999997	147.83382900000001	2007	23/07/2007	DFT1	Tissue	No	Yes	Yes	Unknown				Multiple		0.35799999999999998	Not Available	0.63800000000000001	0.35799999999999998	No	Yes	M	3	Strain 3			17	9	8	1R1_2R1_3R1_4R1_5_6_7_8_9_10R1_11_12_13_15_19_23_24	4	1	3	1R1-7-8|2R1-3R1-5-6-9-10R1-11-15-19|4R1-12-13|23-24	276200000	159900000	116300000	43600000	17
33	33T3a	'07/2296	'982009102737669	Matched	Clade_A1	Clade_A1-3A	DFT1_3	DFT1_3A	1828A>G;3255G>A	Forestier	-42.902220999999997	147.83382900000001	2007	23/07/2007	DFT1	Tissue	No	Yes	Yes	Unknown				Multiple		0.93600000000000005	Not Available	0.91200000000000003	0.93600000000000005	No	Yes	M	3	Strain 3			17	9	8	1R1_2R1_3R1_4R1_5_6_7_8_9_10R1_11_12_13_15_19_23_24	4	1	3	1R1-7-8|2R1-3R1-5-6-9-10R1-11-15-19|4R1-12-13|23-24	276200000	159900000	116300000	43600000	17
34	34T1a	'07/2093	'982009100830635; 00065DC74E	Matched	Clade_A1	Clade_A1-3A	DFT1_3	DFT1_3A	1828A>G;3255G>A	Forestier	-42.902220999999997	147.83382900000001	2007	02/07/2007	DFT1	Tissue	No	Yes	Yes	Facial/oral				Multiple		0.308	Not Available	0.63	0.308	No	Yes	F	2	Strain 3			17	9	8	1R1_2R1_3R1_4R1_5_6_7_8_9_10R1_11_12_13_15_19_23_24	4	1	3	1R1-7-8|2R1-3R1-5-6-9-10R1-11-15-19|4R1-12-13|23-24	276200000	159900000	116300000	43600000	17
34	34T2a	'07/2093	'982009100830635; 00065DC74E	Matched	Clade_A1	Clade_A1-3A	DFT1_3	DFT1_3A	1828A>G;3255G>A	Forestier	-42.902220999999997	147.83382900000001	2007	02/07/2007	DFT1	Tissue	No	Yes	Yes	Facial/oral				Multiple		0.64900000000000002	Not Available	0.77500000000000002	0.64900000000000002	No	Yes	F	2	Strain 3			18	9	9	1R1_2R1_3R1_4R1_5_6_7_8_9_10R1_11_12_13_15_19_23_24_207	5	1	4	1R1-7-8|2R1-3R1-5-6-9-10R1-11-15-19|4R1-12-13|23-24|207	277200000	159900000	117300000	42600000	18
34	34T3a	'07/2093	'982009100830635; 00065DC74E	Matched	Clade_A1	Clade_A1-3A	DFT1_3	DFT1_3A	1828A>G;3255G>A	Forestier	-42.902220999999997	147.83382900000001	2007	02/07/2007	DFT1	Tissue	No	Yes	No (metastasis with matched primary)	Mammary gland		Metastasis		Multiple		0.93	Not Available	0.95199999999999996	0.93	No	Yes	F	2	Strain 3			17	9	8	1R1_2R1_3R1_4R1_5_6_7_8_9_10R1_11_12_13_15_19_23_24	4	1	3	1R1-7-8|2R1-3R1-5-6-9-10R1-11-15-19|4R1-12-13|23-24	276200000	159900000	116300000	43600000	17
36	36T2a	Unknown	'982009102375594	Matched	Clade_B	Clade_B-4	DFT1_4	DFT1_4	7198T>C	Reedy Marsh	-41.401451999999999	146.740793	2007	07/06/2007	DFT1	Cell-Line	No	Yes	No (cell line mislabelling or contamination)	Facial/oral	Upper palate			Singleton		1	Not Available	0.93799999999999994	1	No	Yes	F	3	Strain 1 tetraploid	M5 loss		34	16	18	1R1_2R1_2R1BM17_3R1_3R1BM17_4R1_5_6_6BM22_7_8_9_9BM17_10R1_10R1BM17_11_11BM22_12_13_15_15BM17_16R22_17R22_18R22_19_20R1_25_34R17_35R17_36R17_37R17_38R17_39R17_1006	7	2	5	1R1-7-8|2R1-3R1-5-6-9-10R1-11-15-19|2R1BM17-3R1BM17-6BM22-9BM17-10R1BM17-11BM22-15BM17-16R22-17R22-18R22|4R1-12-13|20R1|25|34R17-35R17-36R17-37R17-38R17-39R17-1006	454107000	240800000	213307000	27493000	34
37	37T1	'07/2209	'982009104235325	Matched	Clade_A2	Clade_A2-3	DFT1_10	DFT1_10	2261T>C	Wukalina	-40.917897000000004	148.240026	2007	13/07/2007	DFT1	Tissue	No	Yes	Yes	Unknown				Singleton		0.89	Not Available	0.90400000000000003	0.89	No	Yes	M	1	Strain 2			19	10	9	1R1_2R1_3R1_4R1_5_6_7_8_9_10R1_11_12_13_15_19_22_26_27R1_160	6	2	4	1R1-7-8|2R1-3R1-5-6-9-10R1-11-15-19|4R1-12-13|22|26-27R1|160	282200000	200000000	82200000	117800000	19
39	39T1	'07/2297	'982009100322308	Matched	Clade_A1	Clade_A1-3A3	DFT1_3	DFT1_3A3a	1828A>G;2572G>A;3255G>A;16137G>A	Forestier	-42.902220999999997	147.83382900000001	2007	23/07/2007	DFT1	Tissue	No	Yes	Yes	Unknown				Multiple		0.89200000000000002	Not Available	0.91700000000000004	0.89200000000000002	No	Yes	M	2	Strain 3	M5 loss		23	9	14	1R1_2R1_3R1_4R1_5_6_6BM6_7_8_9_10R1_11_11BM6_12_13_15_16R6_17R6_18R6_19_23_24_33	6	1	5	1R1-7-8|2R1-3R1-5-6-9-10R1-11-15-19|4R1-12-13|6BM6-11BM6-16R6-17R6-18R6|23-24|33	286107000	159900000	126207000	33693000	23
39	39T2	'07/2297	'982009100322308	Matched	Clade_A1	Clade_A1-3A3	DFT1_3	DFT1_3A3a	1828A>G;2572G>A;3255G>A;16137G>A	Forestier	-42.902220999999997	147.83382900000001	2007	23/07/2007	DFT1	Tissue	No	Yes	Yes	Unknown				Multiple		0.85799999999999998	Not Available	0.90700000000000003	0.85799999999999998	No	Yes	M	2	Strain 3	M5 loss		23	9	14	1R1_2R1_3R1_4R1_5_6_6BM6_7_8_9_10R1_11_11BM6_12_13_15_16R6_17R6_18R6_19_23_24_33	6	1	5	1R1-7-8|2R1-3R1-5-6-9-10R1-11-15-19|4R1-12-13|6BM6-11BM6-16R6-17R6-18R6|23-24|33	286107000	159900000	126207000	33693000	23
39	39T3a	'07/2297	'982009100322308	Matched	Clade_A1	Clade_A1-3A3	DFT1_3	DFT1_3A3a	1828A>G;2572G>A;3255G>A;16137G>A	Forestier	-42.902220999999997	147.83382900000001	2007	23/07/2007	DFT1	Tissue	No	Yes	Yes	Unknown				Multiple		0.92300000000000004	Not Available	0.94699999999999995	0.92300000000000004	No	Yes	M	2	Strain 3	M5 loss		23	9	14	1R1_2R1_3R1_4R1_5_6_6BM6_7_8_9_10R1_11_11BM6_12_13_15_16R6_17R6_18R6_19_23_24_33	6	1	5	1R1-7-8|2R1-3R1-5-6-9-10R1-11-15-19|4R1-12-13|6BM6-11BM6-16R6-17R6-18R6|23-24|33	286107000	159900000	126207000	33693000	23
39	39T4a	'07/2297	'982009100322308	Matched	Clade_A1	Clade_A1-3A3	DFT1_3	DFT1_3A3a	1828A>G;2572G>A;3255G>A;16137G>A	Forestier	-42.902220999999997	147.83382900000001	2007	23/07/2007	DFT1	Tissue	No	Yes	No (metastasis with matched primary)	Lymph node	Submandibular lymph node	Metastasis		Multiple		0.95	Not Available	0.92200000000000004	0.95	No	Yes	M	2	Strain 3	M5 loss		25	9	16	1R1_2R1_3R1_4R1_5_6_6BM6_7_8_9_10R1_11_11BM6_12_13_15_16R6_17R6_18R6_19_23_24_33_897_898	7	1	6	1R1-7-8|2R1-3R1-5-6-9-10R1-11-15-19|4R1-12-13|6BM6-11BM6-16R6-17R6-18R6|23-24|33|897-898	290507000	159900000	130607000	29293000	25
40	40T2a	'07/2336	'985120015992583	Matched	Clade_A1	Clade_A1-3A3	DFT1_3	DFT1_3A3a3	1828A>G;2572G>A;3255G>A;16137G>A;4580T>C	Forestier	-42.902220999999997	147.83382900000001	2007	25/07/2007	DFT1	Tissue	No	Yes	Yes	Unknown				Multiple		0.88400000000000001	Not Available	0.77600000000000002	0.88400000000000001	No	Yes	F	Unknown	Strain 3	M5 loss		25	9	16	1R1_2R1_3R1_4R1_5_6_6BM6_7_8_9_10R1_11_11BM6_12_13_15_16R6_17R6_18R6_19_23_24_33_897_898	7	1	6	1R1-7-8|2R1-3R1-5-6-9-10R1-11-15-19|4R1-12-13|6BM6-11BM6-16R6-17R6-18R6|23-24|33|897-898	290507000	159900000	130607000	29293000	25
40	40T3a	'07/2336	'985120015992583	Matched	Clade_A1	Clade_A1-3A3	DFT1_3	DFT1_3A3a	1828A>G;2572G>A;3255G>A;16137G>A	Forestier	-42.902220999999997	147.83382900000001	2007	25/07/2007	DFT1	Tissue	No	Yes	No (metastasis with matched primary)	Lymph node	Submandibular lymph node	Metastasis		Multiple		0.876	Not Available	0.73599999999999999	0.876	No	Yes	F	Unknown	Strain 3	M5 loss		23	9	14	1R1_2R1_3R1_4R1_5_6_6BM6_7_8_9_10R1_11_11BM6_12_13_15_16R6_17R6_18R6_19_23_24_33	6	1	5	1R1-7-8|2R1-3R1-5-6-9-10R1-11-15-19|4R1-12-13|6BM6-11BM6-16R6-17R6-18R6|23-24|33	286107000	159900000	126207000	33693000	16
40	40T4a	'07/2336	'985120015992583	Matched	Clade_A1	Clade_A1-3A3	DFT1_3	DFT1_3A3a1	611C>T;1828A>G;2572G>A;3255G>A;16137G>A	Forestier	-42.902220999999997	147.83382900000001	2007	25/07/2007	DFT1	Tissue	No	Yes	No (metastasis with matched primary)	Spleen		Metastasis		Multiple		0.77600000000000002	Not Available	0.84699999999999998	0.77600000000000002	No	Yes	F	Unknown	Strain 3	M5 loss		23	9	14	1R1_2R1_3R1_4R1_5_6_6BM6_7_8_9_10R1_11_11BM6_12_13_15_16R6_17R6_18R6_19_23_24_33	6	1	5	1R1-7-8|2R1-3R1-5-6-9-10R1-11-15-19|4R1-12-13|6BM6-11BM6-16R6-17R6-18R6|23-24|33	286107000	159900000	126207000	33693000	23
40	40T5a	'07/2336	'985120015992583	Matched	Clade_A1	Clade_A1-3A3	DFT1_3	DFT1_3A3a	1828A>G;2572G>A;3255G>A;16137G>A	Forestier	-42.902220999999997	147.83382900000001	2007	25/07/2007	DFT1	Tissue	No	Yes	Yes	Unknown				Multiple		0.88300000000000001	Not Available	0.80300000000000005	0.88300000000000001	No	Yes	F	Unknown	Strain 3	M5 loss		23	9	14	1R1_2R1_3R1_4R1_5_6_6BM6_7_8_9_10R1_11_11BM6_12_13_15_16R6_17R6_18R6_19_23_24_33	6	1	5	1R1-7-8|2R1-3R1-5-6-9-10R1-11-15-19|4R1-12-13|6BM6-11BM6-16R6-17R6-18R6|23-24|33	286107000	159900000	126207000	33693000	23
40	40T6a	'07/2336	'985120015992583	Matched	Clade_A1	Clade_A1-3A3	DFT1_3	DFT1_3A3a2	1828A>G;2572G>A;3255G>A;16137G>A;10452G>A	Forestier	-42.902220999999997	147.83382900000001	2007	25/07/2007	DFT1	Tissue	No	Yes	Yes	Unknown				Multiple		0.89100000000000001	Not Available	0.78600000000000003	0.89100000000000001	No	Yes	F	Unknown	Strain 3	M5 loss		23	9	14	1R1_2R1_3R1_4R1_5_6_6BM6_7_8_9_10R1_11_11BM6_12_13_15_16R6_17R6_18R6_19_23_24_33	6	1	5	1R1-7-8|2R1-3R1-5-6-9-10R1-11-15-19|4R1-12-13|6BM6-11BM6-16R6-17R6-18R6|23-24|33	286107000	159900000	126207000	33693000	23
40	40T7a	'07/2336	'985120015992583	Matched	Clade_A1	Clade_A1-3A3	DFT1_3	DFT1_3A3a	1828A>G;2572G>A;3255G>A;16137G>A	Forestier	-42.902220999999997	147.83382900000001	2007	25/07/2007	DFT1	Tissue	No	Yes	Yes	Unknown				Multiple		0.748	Not Available	0.94699999999999995	0.748	No	Yes	F	Unknown	Strain 3	M5 loss		24	9	15	1R1_2R1_3R1_4R1_5_6_6BM6_7_8_9_10R1_11_11BM6_12_13_15_16R6_17R6_18R6_19_23_24_33_923	7	1	6	1R1-7-8|2R1-3R1-5-6-9-10R1-11-15-19|4R1-12-13|6BM6-11BM6-16R6-17R6-18R6|23-24|33|923	288207000	159900000	128307000	31593000	24
40	40T8a	'07/2336	'985120015992583	Matched	Clade_A1	Clade_A1-3A3	DFT1_3	DFT1_3A3a1	611C>T;1828A>G;2572G>A;3255G>A;16137G>A	Forestier	-42.902220999999997	147.83382900000001	2007	25/07/2007	DFT1	Tissue	No	Yes	No (metastasis with matched primary)	Kidney		Metastasis		Multiple		0.94399999999999995	Not Available	0.95299999999999996	0.94399999999999995	No	Yes	F	Unknown	Strain 3	M5 loss		23	9	14	1R1_2R1_3R1_4R1_5_6_6BM6_7_8_9_10R1_11_11BM6_12_13_15_16R6_17R6_18R6_19_23_24_33	6	1	5	1R1-7-8|2R1-3R1-5-6-9-10R1-11-15-19|4R1-12-13|6BM6-11BM6-16R6-17R6-18R6|23-24|33	286107000	159900000	126207000	33693000	23
40	40T9a	'07/2336	'985120015992583	Matched	Clade_A1	Clade_A1-3A3	DFT1_3	DFT1_3A3a	1828A>G;2572G>A;3255G>A;16137G>A	Forestier	-42.902220999999997	147.83382900000001	2007	25/07/2007	DFT1	Tissue	No	Yes	No (metastasis with matched primary)	Lymph node	Auxiliary lymph node	Metastasis		Multiple		0.95899999999999996	Not Available	0.93700000000000006	0.95899999999999996	No	Yes	F	Unknown	Strain 3	M5 loss		24	9	15	1R1_2R1_3R1_4R1_5_6_6BM6_7_8_9_10R1_11_11BM6_12_13_15_16R6_17R6_18R6_19_23_24_33_923	7	1	6	1R1-7-8|2R1-3R1-5-6-9-10R1-11-15-19|4R1-12-13|6BM6-11BM6-16R6-17R6-18R6|23-24|33|923	288207000	159900000	128307000	31593000	24
45	45T1	'08/0134	'982009104349396	Matched	Clade_A1	Clade_A1-3A3	DFT1_3	DFT1_3A3a	1828A>G;2572G>A;3255G>A;16137G>A	Forestier	-42.902220999999997	147.83382900000001	2008	16/01/2008	DFT1	Tissue	No	Yes	Yes	Facial/oral	Left side of face			Multiple		0.90600000000000003	Not Available	0.91900000000000004	0.90600000000000003	No	Yes	M	2	Strain 3	M5 loss		23	9	14	1R1_2R1_3R1_4R1_5_6_6BM6_7_8_9_10R1_11_11BM6_12_13_15_16R6_17R6_18R6_19_23_24_33	6	1	5	1R1-7-8|2R1-3R1-5-6-9-10R1-11-15-19|4R1-12-13|6BM6-11BM6-16R6-17R6-18R6|23-24|33	286107000	159900000	126207000	33693000	23
45	45T3	'08/0134	'982009104349396	Matched	Clade_A1	Clade_A1-3A3	DFT1_3	DFT1_3A3a	1828A>G;2572G>A;3255G>A;16137G>A	Forestier	-42.902220999999997	147.83382900000001	2008	16/01/2008	DFT1	Tissue	No	Yes	Yes	Facial/oral	Interior left upper lip			Multiple		0.93300000000000005	Not Available	0.95	0.93300000000000005	No	Yes	M	2	Strain 3	M5 loss		23	9	14	1R1_2R1_3R1_4R1_5_6_6BM6_7_8_9_10R1_11_11BM6_12_13_15_16R6_17R6_18R6_19_23_24_33	6	1	5	1R1-7-8|2R1-3R1-5-6-9-10R1-11-15-19|4R1-12-13|6BM6-11BM6-16R6-17R6-18R6|23-24|33	286107000	159900000	126207000	33693000	23
45	45T5	'08/0134	'982009104349396	Matched	Clade_A1	Clade_A1-3A3	DFT1_3	DFT1_3A3a	1828A>G;2572G>A;3255G>A;16137G>A	Forestier	-42.902220999999997	147.83382900000001	2008	16/01/2008	DFT1	Tissue	No	Yes	Yes	Facial/oral				Multiple		0.70799999999999996	Not Available	0.85099999999999998	0.70799999999999996	No	Yes	M	2	Strain 3	M5 loss		23	9	14	1R1_2R1_3R1_4R1_5_6_6BM6_7_8_9_10R1_11_11BM6_12_13_15_16R6_17R6_18R6_19_23_24_33	6	1	5	1R1-7-8|2R1-3R1-5-6-9-10R1-11-15-19|4R1-12-13|6BM6-11BM6-16R6-17R6-18R6|23-24|33	286107000	159900000	126207000	33693000	23
46	46T1	'08/2215	'982009104247056	Matched	Clade_C	Clade_C-1	DFT1_11	DFT1_11	6745T>C	Gladstone	-41.014195999999998	148.04947899999999	2008	15/07/2008	DFT1	Tissue	No	Yes	Yes	Facial/oral	Lower palate extending through to chin			Singleton		0.92500000000000004	Not Available	0.92	0.92500000000000004	No	Yes	F	2	Strain 2			28	15	13	1R1_2R1_3R1_4R1_5_6_7_8_9_10R1_11_12_12BM1_13_15_19_115G1CN4_141_142_143_818_896_902_949_951_957_958_959	5	2	3	1R1-7-8|2R1-3R1-5-6-9-10R1-11-15-19|4R1-12-13|12BM1-115G1CN4-141-142-143-818|896-902-949-951-957-958-959	256000000	168100000	87900000	80200000	28
47	47T1	'08/0289	'982009100840254	Matched	Clade_A2	Clade_A2-8	DFT1_1	DFT1_1	10133C>T	Westbury	-41.526670000000003	146.82378	2008	02/01/2008	DFT1	Tissue	No	Yes	Yes	Unknown				Singleton		0.63300000000000001	Not Available	0.82899999999999996	0.63300000000000001	No	Yes	M	3	Strain 1 tetraploid	M5 loss	Tetraploid (5)	27	10	17	1R1_2R1_3R1_4R1_5_6_6BM17_7_8_9_10R1_11_11BM17_12_13_15_16R17_17R17_18R17_19_22_26_27R1_308_309_901_945	9	2	7	1R1-7-8|2R1-3R1-5-6-9-10R1-11-15-19|4R1-12-13|6BM17-11BM17-16R17-17R17-18R17|22|26-27R1|308-309|901|945	288107000	183700000	104407000	79293000
49	49T1	'07/3518	Unknown	Matched	Clade_A2	Clade_A2-4	DFT1_9	DFT1_9	4266G>A	Mangalore	-42.658489000000003	147.18272400000001	2007	11/06/2007	DFT1	Tissue	No	Yes	Yes	Unknown				Multiple		0.81599999999999995	Not Available	0.91600000000000004	0.81599999999999995	No	Yes	F	2	Strain 1 tetraploid	M5 loss	Tetraploid (3)	24	9	15	1R1_2R1_3R1_4R1_5_6_6BM12_7_8_9_10R1_11_11BM12_12_13_15_16R12_17R12_18R12_19_22_26_27R1_118	6	1	5	1R1-7-8|2R1-3R1-5-6-9-10R1-11-15-19|4R1-12-13|6BM12-11BM12-16R12-17R12-18R12-118|22|26-27R1	250807000	159900000	90907000	68993000
49	49T3	'07/3518	Unknown	Matched	Clade_A2	Clade_A2-4	DFT1_9	DFT1_9	4266G>A	Mangalore	-42.658489000000003	147.18272400000001	2007	11/06/2007	DFT1	Tissue	No	Yes	Yes	Unknown				Multiple		0.73799999999999999	Not Available	0.85	0.73799999999999999	No	Yes	F	2	Strain 1 tetraploid	M5 loss	Tetraploid (3)	25	10	15	1R1_2R1_3R1_4R1_5_6_6BM12_7_8_9_10R1_11_11BM12_12_13_15_16R12_17R12_18R12_19_22_26_27R1_118_905	7	2	5	1R1-7-8|2R1-3R1-5-6-9-10R1-11-15-19|4R1-12-13|6BM12-11BM12-16R12-17R12-18R12-118|22|26-27R1|905	251807000	160900000	90907000	69993000
50	50T1	'08/1451	'982009104928332	Matched	Clade_B	Clade_B-3	DFT1_7	DFT1_7A3a	2707G>A;3679G>A;8529G>A;11408G>A	Kempton	-42.525894000000001	147.20354900000001	2008	15/05/2008	DFT1	Tissue	No	Yes	Yes	Unknown				Multiple		0.92300000000000004	Not Available	0.77300000000000002	0.92300000000000004	No	Yes	Intersex	Unknown	Strain 2			20	9	11	1R1_2R1_3R1_4R1_5_6_7_8_9_10R1_11_12_13_15_19_20R1_47R1_51R3_57_58	5	1	4	1R1-7-8|2R1-3R1-5-6-9-10R1-11-15-19|4R1-12-13|20R1|47R1-51R3-57-58	263500000	159900000	103600000	56300000	20
50	50T2	'08/1451	'982009104928332	Matched	Clade_B	Clade_B-3	DFT1_7	DFT1_7A3	2707G>A;3679G>A;8529G>A	Kempton	-42.525894000000001	147.20354900000001	2008	15/05/2008	DFT1	Tissue	No	Yes	Yes	Unknown				Multiple		0.83099999999999996	Not Available	0.86299999999999999	0.83099999999999996	No	Yes	Intersex	Unknown	Strain 2			20	9	11	1R1_2R1_3R1_4R1_5_6_7_8_9_10R1_11_12_13_15_19_20R1_47R1_51R3_57_58	5	1	4	1R1-7-8|2R1-3R1-5-6-9-10R1-11-15-19|4R1-12-13|20R1|47R1-51R3-57-58	263500000	159900000	103600000	56300000	20
51	51T1	'08/1818	'982009104847105	Matched	Clade_B	Clade_B-3	DFT1_16	DFT1_16	8617T>C	Kempton	-42.525894000000001	147.20354900000001	2008	13/06/2008	DFT1	Tissue	No	Yes	Yes	Unknown				Multiple		0.91400000000000003	0.90100000000000002	0.92900000000000005	0.90749999999999997	Yes	Yes	M	Unknown	Strain 1			19	9	10	1R1_2R1_3R1_4R1_5_6_7_8_9_10R1_11_12_13_15_19_20R1_21R6_570_571	5	1	4	1R1-7-8|2R1-3R1-5-6-9-10R1-11-15-19|4R1-12-13|20R1|21R6-570-571	254900000	159900000	95000000	64900000	19
51	51T2	'08/1818	'982009104847105	Matched	Clade_B	Clade_B-3	DFT1_7	DFT1_7A	2707G>A;8529G>A	Kempton	-42.525894000000001	147.20354900000001	2008	13/06/2008	DFT1	Tissue	No	Yes	Yes	Unknown				Multiple		0.67300000000000004	0.69099999999999995	0.91600000000000004	0.68200000000000005	Yes	Yes	M	Unknown	Strain 1			21	9	12	1R1_2R1_3R1_4R1_5_6_7_8_9_10R1_11_12_13_15_19_20R1_47R1_51R3_57_58_566	6	1	5	1R1-7-8|2R1-3R1-5-6-9-10R1-11-15-19|4R1-12-13|20R1|47R1-51R3-57-58|566	265300000	159900000	105400000	54500000	20
52	52T1	'08/1963	'982009105188074	Matched	Clade_A1	Clade_A1-1	DFT1_0	DFT1_0	Novariants	Freycinet	-42.194752999999999	148.30324300000001	2008	24/06/2008	DFT1	Tissue	No	Yes	Yes	Unknown				Multiple		0.58299999999999996	0.57299999999999995	Not Available	0.57799999999999996	Yes	Yes	M	2	No data (confirmed)			41	34	7	1R1_2R1_3R1_4R1_5_6_7_8_9_10R1_11_12_13_15_19_48R1_55R1_56R1_63_63G1CN4_63G1CN5_63G1CN6_63G1CN7_63G1CN8_63G1CN9_64_64G1CN4_64G1CN5_64G1CN6_64G1CN7_64G1CN8_64G1CN9_65_65G1CN4_65G1CN5_65G1CN6_65G1CN7_65G1CN8_65G1CN9_66_70	9	6	3	1R1-7-8|2R1-3R1-5-6-9-10R1-11-15-19|4R1-12-13|48R1-55R1-56R1-63-63G1CN4-64-64G1CN4-65-65G1CN4-66|63G1CN5-63G1CN6-64G1CN5-64G1CN6-65G1CN5-65G1CN6|63G1CN7-64G1CN7-65G1CN7|63G1CN8-64G1CN8-65G1CN8|63G1CN9-64G1CN9-65G1CN9|70	312100000	260200000	51900000	208300000	41
52	52T2	'08/1963	'982009105188074	Matched	Clade_A1	Clade_A1-1	DFT1_0	DFT1_0	Novariants	Freycinet	-42.194752999999999	148.30324300000001	2008	24/06/2008	DFT1	Tissue	No	Yes	Yes	Unknown				Multiple		0.88	0.91400000000000003	Not Available	0.89700000000000002	Yes	Yes	M	2	No data (confirmed)			44	37	7	1R1_2R1_3R1_4R1_5_6_7_8_9_10R1_11_12_13_15_19_48R1_55R1_56R1_63_63G1CN4_63G1CN5_63G1CN6_63G1CN7_63G1CN8_63G1CN9_63G1CN10_64_64G1CN4_64G1CN5_64G1CN6_64G1CN7_64G1CN8_64G1CN9_64G1CN10_65_65G1CN4_65G1CN5_65G1CN6_65G1CN7_65G1CN8_65G1CN9_65G1CN10_66_70	10	7	3	1R1-7-8|2R1-3R1-5-6-9-10R1-11-15-19|4R1-12-13|48R1-55R1-56R1-63-63G1CN4-64-64G1CN4-65-65G1CN4-66|63G1CN5-63G1CN6-64G1CN5-64G1CN6-65G1CN5-65G1CN6|63G1CN7-64G1CN7-65G1CN7|63G1CN8-64G1CN8-65G1CN8|63G1CN9-64G1CN9-65G1CN9|63G1CN10-64G1CN10-65G1CN10|70	324600000	272700000	51900000	220800000	44
53	53T2	'07/3213	'982009100418077	Matched	Clade_A2	Clade_A2-8	DFT1_1	DFT1_1	10133C>T	Narawntapu	-41.139961999999997	146.64416399999999	2007	10/08/2007	DFT1	Tissue	No	Yes	Yes	Unknown				Singleton		0.80700000000000005	Not Available	0.88400000000000001	0.80700000000000005	No	Yes	M	4	Strain 1 evolved tetraploid	M5 loss	Tetraploid (5)	25	9	16	1R1_2R1_3R1_4R1_5_6_6BM17_7_8_9_10R1_11_11BM17_12_13_15_16R17_17R17_18R17_19_22_26_27R1_80_984	7	1	6	1R1-7-8|2R1-3R1-5-6-9-10R1-11-15-19|4R1-12-13|6BM17-11BM17-16R17-17R17-18R17|22|26-27R1|80-984	308607000	159900000	148707000	11193000
54	54T1	'08/1573	'982009104855230	Matched	Clade_A2	Clade_A2-10	DFT1_17	DFT1_17	8085G>A	West Pencil Pine	-41.717464999999997	145.85587000000001	2008	29/05/2008	DFT1	Tissue	No	Yes	Yes	Unknown				Singleton		0.78300000000000003	0.78900000000000003	0.90900000000000003	0.78600000000000003	Yes	Yes	F	3	Strain 2	M5 loss		34	19	15	1R1_2R1_3R1_4R1_5_6_6BM17_7_8_9_10R1_10R1G1CN4_10R1G1CN5_11_11BM17_12_13_15_15G1CN4_15G1CN5_16R17_17R17_18R17_19_22_26_27R1_93G1CN4_93G1CN5_93G1CN6_93G1CN7_102G1CN4_102G1CN5_1827	11	5	6	1R1-7-8|2R1-3R1-5-6-9-10R1-11-15-19|4R1-12-13|6BM17-11BM17-16R17-17R17-18R17|10R1G1CN4-15G1CN4-93G1CN4-93G1CN5-102G1CN4|10R1G1CN5-15G1CN5-102G1CN5|22|26-27R1|93G1CN6|93G1CN7|1827	268107000	175500000	92607000	82893000	34
55	55T1	'07/2783	'000658C2A0	Matched	Clade_B	Clade_B-9	DFT1_2	DFT1_2	14114C>T	Mole Creek (captive)	-41.552312999999998	146.45533829999999	2007	03/09/2007	DFT1	Tissue	No	Yes	Yes	Liver		Metastasis		Multiple		0.86299999999999999	0.82299999999999995	0.85699999999999998	0.84299999999999997	Yes	Yes	M	4	Strain 2			19	9	10	1R1_2R1_3R1_4R1_5_6_7_8_9_10R1_11_12_13_15_19_20R1_21R1_25_326	7	1	6	1R1-7-8|2R1-3R1-5-6-9-10R1-11-15-19|4R1-12-13|20R1|21R1|25|326	225900000	159900000	66000000	93900000	19
55	55T2	'07/2783	'000658C2A0	Matched	Clade_B	Clade_B-9	DFT1_2	DFT1_2	14114C>T	Mole Creek (captive)	-41.552312999999998	146.45533829999999	2007	03/09/2007	DFT1	Tissue	No	Yes	No (metastasis with matched primary)	Liver		Metastasis		Multiple		0.82	0.80500000000000005	0.83099999999999996	0.8125	Yes	Yes	M	4	Strain 2			19	9	10	1R1_2R1_3R1_4R1_5_6_7_8_9_10R1_11_12_13_15_19_20R1_21R1_25_326	7	1	6	1R1-7-8|2R1-3R1-5-6-9-10R1-11-15-19|4R1-12-13|20R1|21R1|25|326	225900000	159900000	66000000	93900000	19
55	55T3	'07/2783	'000658C2A0	Matched	Clade_B	Clade_B-9	DFT1_2	DFT1_2	14114C>T	Mole Creek (captive)	-41.552312999999998	146.45533829999999	2007	03/09/2007	DFT1	Tissue	No	Yes (italicised)	No (metastasis with matched primary)	Spleen		Metastasis		Multiple		0.14199999999999999	0.32600000000000001	0.76	0.23400000000000001	No	No	M	4	Strain 2	No data
56	56T1	'07/3880	'982009104808995	Matched	Clade_C	Clade_C-2	DFT1_0	DFT1_0	Novariants	Upper Natone	-41.225067000000003	145.8115803	2007	06/12/2007	DFT1	Tissue	No	Yes	Yes	Unknown				Multiple		0.78600000000000003	0.745	Not Available	0.76549999999999996	Yes	Yes	M	2	Strain 2			15	9	6	1R1_2R1_3R1_4R1_5_6_7_8_9_10R1_11_12_13_15_19	3	1	2	1R1-7-8|2R1-3R1-5-6-9-10R1-11-15-19|4R1-12-13	211000000	159900000	51100000	108800000	15
56	56T2	'07/3880	'982009104808995	Matched	Clade_C	Clade_C-2	DFT1_0	DFT1_0	Novariants	Upper Natone	-41.225067000000003	145.8115803	2007	06/12/2007	DFT1	Tissue	No	Yes	Yes	Unknown				Multiple		0.95399999999999996	0.93500000000000005	Not Available	0.94450000000000001	Yes	Yes	M	2	Strain 2			15	9	6	1R1_2R1_3R1_4R1_5_6_7_8_9_10R1_11_12_13_15_19	3	1	2	1R1-7-8|2R1-3R1-5-6-9-10R1-11-15-19|4R1-12-13	211000000	159900000	51100000	108800000	15
57	57T1	'08/0195	'982009104859904	Matched	Clade_A2	Clade_A2-8	DFT1_1	DFT1_1	10133C>T	Narawntapu	-41.139961999999997	146.64416399999999	2008	22/01/2008	DFT1	Tissue	No	Yes	Yes	Unknown				Singleton		0.50600000000000001	0.46800000000000003	0.67500000000000004	0.48699999999999999	Yes	Yes	M	3	Strain 1 tetraploid	M5 loss	Tetraploid (5)	26	10	16	1R1_2R1_3R1_4R1_5_6_6BM17_7_8_9_10R1_11_11BM17_12_13_15_16R17_17R17_18R17_19_22_26_27R1_80_121R2_984	8	2	6	1R1-7-8|2R1-3R1-5-6-9-10R1-11-15-19|4R1-12-13|6BM17-11BM17-16R17-17R17-18R17|22|26-27R1|80-984|121R2	319507000	170800000	148707000	22093000
58	58T1	'07/2259	'982009100906846	Matched	Clade_A1	Clade_A1-3A	DFT1_3	DFT1_3A	1828A>G;3255G>A	Forestier	-42.902220999999997	147.83382900000001	2007	19/07/2007	DFT1	Tissue	No	Yes	Yes	Unknown				Singleton		0.67600000000000005	0.66700000000000004	0.81200000000000006	0.67149999999999999	Yes	Yes	M	2	Strain 3			18	9	9	1R1_2R1_3R1_4R1_5_6_7_8_9_10R1_11_12_13_15_19_23_24_33	5	1	4	1R1-7-8|2R1-3R1-5-6-9-10R1-11-15-19|4R1-12-13|23-24|33	277900000	159900000	118000000	41900000	18
59	59T1	'07/2389	'982009100823186	Unmatched	Clade_A1	Clade_A1-3A	DFT1_3	DFT1_3A	1828A>G;3255G>A	Forestier	-42.902220999999997	147.83382900000001	2007	06/06/2007	DFT1	Tissue	No	Yes	Yes	Unknown				Multiple		0.876	0.88	0.93200000000000005	0.878	Yes	Yes	F	2	Strain 3			17	9	8	1R1_2R1_3R1_4R1_5_6_7_8_9_10R1_11_12_13_15_19_23_24	4	1	3	1R1-7-8|2R1-3R1-5-6-9-10R1-11-15-19|4R1-12-13|23-24	276200000	159900000	116300000	43600000	17
59	59T2	'07/2389	'982009100823186	Unmatched	Clade_A1	Clade_A1-3A	DFT1_3	DFT1_3A	1828A>G;3255G>A	Forestier	-42.902220999999997	147.83382900000001	2007	06/06/2007	DFT1	Tissue	No	Yes	Yes	Unknown				Multiple		0.57199999999999995	0.59499999999999997	0.81	0.58350000000000002	Yes	Yes	F	2	Strain 3			17	9	8	1R1_2R1_3R1_4R1_5_6_7_8_9_10R1_11_12_13_15_19_23_24	4	1	3	1R1-7-8|2R1-3R1-5-6-9-10R1-11-15-19|4R1-12-13|23-24	276200000	159900000	116300000	43600000	17
59	59T3	'07/2389	'982009100823186	Unmatched	Clade_A1	Clade_A1-3A	DFT1_3	DFT1_3A	1828A>G;3255G>A	Forestier	-42.902220999999997	147.83382900000001	2007	06/06/2007	DFT1	Tissue	No	Yes	Yes	Unknown				Multiple		0.64500000000000002	0.65700000000000003	0.76200000000000001	0.65100000000000002	Yes	Yes	F	2	Strain 3			18	9	9	1R1_2R1_3R1_4R1_5_6_7_8_9_10R1_11_12_13_15_19_23_24_207	5	1	4	1R1-7-8|2R1-3R1-5-6-9-10R1-11-15-19|4R1-12-13|23-24|207	277200000	159900000	117300000	42600000	18
61	61T	'08/2378	'982009104809064	Matched	Clade_A1	Clade_A1-3A	DFT1_3	DFT1_3A	1828A>G;3255G>A	Forestier	-42.902220999999997	147.83382900000001	2008	25/07/2008	DFT1	Tissue	No	Yes	Yes	Neck	Ventral to head			Singleton		0.628	0.63800000000000001	0.749	0.63300000000000001	Yes	Yes	M	2	Strain 3			17	9	8	1R1_2R1_3R1_4R1_5_6_7_8_9_10R1_11_12_13_15_19_23_24	4	1	3	1R1-7-8|2R1-3R1-5-6-9-10R1-11-15-19|4R1-12-13|23-24	276200000	159900000	116300000	43600000	17
63	63T2	'08/2380	'982009104248590	Matched	Clade_A1	Clade_A1-3A	DFT1_3	DFT1_3A	1828A>G;3255G>A	Forestier	-42.902220999999997	147.83382900000001	2008	28/07/2008	DFT1	Tissue	No	Yes	Yes	Facial/oral				Multiple		0.68899999999999995	0.73199999999999998	0.82599999999999996	0.71050000000000002	Yes	Yes	M	2	Strain 3	M5 loss		40	26	14	1R1_2R1_3R1_4R1_5_6_6BM36_7_8_9_10R1_11_11BM36_12_13_15_16R36_17R36_18R36_19_23_24_33_40R3_40R3G1CN4_40R3G1CN5_40R3G1CN6_40R3G1CN7_43R3_43R3G1CN4_43R3G1CN5_43R3G1CN6_43R3G1CN7_49R3_49R3G1CN4_49R3G1CN5_49R3G1CN6_49R3G1CN7_73R3_101R2	9	4	5	1R1-7-8|2R1-3R1-5-6-9-10R1-11-15-19|4R1-12-13|6BM36-11BM36-16R36-17R36-18R36|23-24|33|40R3-40R3G1CN4-40R3G1CN5-43R3-43R3G1CN4-43R3G1CN5-49R3-49R3G1CN4-49R3G1CN5|40R3G1CN6-43R3G1CN6-49R3G1CN6-73R3-101R2|40R3G1CN7-43R3G1CN7-49R3G1CN7	298412000	172205000	126207000	45998000	40
63	63T3	'08/2380	'982009104248590	Matched	Clade_A1	Clade_A1-3A	DFT1_3	DFT1_3A	1828A>G;3255G>A	Forestier	-42.902220999999997	147.83382900000001	2008	28/07/2008	DFT1	Tissue	No	Yes	Yes	Facial/oral				Multiple		0.89700000000000002	0.88200000000000001	0.91400000000000003	0.88949999999999996	Yes	Yes	M	2	Strain 3			27	18	9	1R1_2R1_3R1_4R1_5_6_7_8_9_10R1_11_12_13_15_19_23_24_33_40R3_40R3G1CN4_40R3G1CN5_43R3_43R3G1CN4_43R3G1CN5_49R3_49R3G1CN4_49R3G1CN5	6	2	4	1R1-7-8|2R1-3R1-5-6-9-10R1-11-15-19|4R1-12-13|23-24|33|40R3-40R3G1CN4-40R3G1CN5-43R3-43R3G1CN4-43R3G1CN5-49R3-49R3G1CN4-49R3G1CN5	283723000	165723000	118000000	47723000	27
64	64T	'08/2385	'982009104836888	Matched	Clade_A1	Clade_A1-3A2	DFT1_3	DFT1_3A2a	1828A>G;3255G>A;3430T>A;4311G>A	Forestier	-42.902220999999997	147.83382900000001	2008	28/07/2008	DFT1	Tissue	No	Yes	Yes	Facial/oral				Singleton		0.84099999999999997	0.83899999999999997	0.90100000000000002	0.84	Yes	Yes	M	2	No data (confirmed)			17	9	8	1R1_2R1_3R1_4R1_5_6_7_8_9_10R1_11_12_13_15_19_23_24	4	1	3	1R1-7-8|2R1-3R1-5-6-9-10R1-11-15-19|4R1-12-13|23-24	276200000	159900000	116300000	43600000	17
66	66T1	'08/2387	'982009105171583	Matched	Clade_A1	Clade_A1-3A	DFT1_3	DFT1_3A	1828A>G;3255G>A	Forestier	-42.902220999999997	147.83382900000001	2008	30/07/2008	DFT1	Tissue	No	Yes	Yes	Facial/oral				Multiple		0.86799999999999999	0.88	0.89900000000000002	0.874	Yes	Yes	M	2	Strain 3 evolved			23	15	8	1R1_2R1_3R1_4R1_5_6_7_8_9_10R1_11_12_13_15_19_23_24_40R6_43R4_49R8_109_1828_1829	7	4	3	1R1-7-8|2R1-3R1-5-6-9-10R1-11-15-19|4R1-12-13|23-24|40R6-49R8-1828-1829|43R4|109	282191000	165891000	116300000	49591000	21
66	66T2	'08/2387	'982009105171583	Matched	Clade_A1	Clade_A1-3A4	DFT1_3	DFT1_3A4a	1116A>G;1828A>G;3255G>A;4422G>A	Forestier	-42.902220999999997	147.83382900000001	2008	30/07/2008	DFT1	Tissue	No	Yes	Yes	Facial/oral				Multiple		0.83099999999999996	0.81299999999999994	0.88400000000000001	0.82199999999999995	Yes	Yes	M	2	Strain 3 evolved			17	9	8	1R1_2R1_3R1_4R1_5_6_7_8_9_10R1_11_12_13_15_19_23_24	4	1	3	1R1-7-8|2R1-3R1-5-6-9-10R1-11-15-19|4R1-12-13|23-24	276200000	159900000	116300000	43600000	17
66	66T3	'08/2387	'982009105171583	Matched	Clade_A1	Clade_A1-3A	DFT1_3	DFT1_3A	1828A>G;3255G>A	Forestier	-42.902220999999997	147.83382900000001	2008	30/07/2008	DFT1	Tissue	No	Yes	No (metastasis with matched primary)	Lymph node	Submandibular lymph node	Metastasis		Multiple		0.91500000000000004	0.92800000000000005	0.93300000000000005	0.92149999999999999	Yes	Yes	M	2	Strain 3 evolved			19	11	8	1R1_2R1_3R1_4R1_5_6_7_8_9_10R1_11_12_13_15_19_23_24_43R4_109	6	3	3	1R1-7-8|2R1-3R1-5-6-9-10R1-11-15-19|4R1-12-13|23-24|43R4|109	277741000	161441000	116300000	45141000	19
66	66T4	'08/2387	'982009105171583	Matched	Clade_A1	Clade_A1-3A4	DFT1_3	DFT1_3A4a	1116A>G;1828A>G;3255G>A;4422G>A	Forestier	-42.902220999999997	147.83382900000001	2008	30/07/2008	DFT1	Tissue	No	Yes	No (metastasis with matched primary)	Lymph node	Submandibular lymph node	Metastasis		Multiple		0.93300000000000005	0.93400000000000005	0.93200000000000005	0.9335	Yes	Yes	M	2	Strain 3 evolved			17	9	8	1R1_2R1_3R1_4R1_5_6_7_8_9_10R1_11_12_13_15_19_23_24	4	1	3	1R1-7-8|2R1-3R1-5-6-9-10R1-11-15-19|4R1-12-13|23-24	276200000	159900000	116300000	43600000	17
66	66T6	'08/2387	'982009105171583	Matched	Clade_A1	Clade_A1-3A	DFT1_3	DFT1_3A	1828A>G;3255G>A	Forestier	-42.902220999999997	147.83382900000001	2008	30/07/2008	DFT1	Tissue	No	Yes	No (metastasis with matched primary)	Omentum		Metastasis		Multiple		0.26800000000000002	0.26800000000000002	0.33900000000000002	0.26800000000000002	No	Yes	M	2	Strain 3 evolved			18	10	8	1R1_2R1_3R1_4R1_5_6_7_8_9_10R1_11_12_13_15_19_23_24_109	5	2	3	1R1-7-8|2R1-3R1-5-6-9-10R1-11-15-19|4R1-12-13|23-24|109	277200000	160900000	116300000	44600000	18
67	67T	Unknown	'982009104869228	Matched	Clade_A1	Clade_A1-3A	DFT1_3	DFT1_3A	1828A>G;3255G>A	Forestier	-42.902220999999997	147.83382900000001	2008	29/07/2008	DFT1	Tissue	No	Yes	Yes	Neck	ventral to head			Singleton		0.81100000000000005	0.80400000000000005	0.878	0.8075	Yes	Yes	F	2	No data (confirmed)	M5 loss		37	23	14	1R1_2R1_3R1_4R1_5_6_6BM36_7_8_9_10R1_11_11BM36_12_13_15_16R36_17R36_18R36_19_23_24_33_40R3_40R3G1CN4_40R3G1CN5_40R3G1CN6_43R3_43R3G1CN4_43R3G1CN5_43R3G1CN6_49R3_49R3G1CN4_49R3G1CN5_49R3G1CN6_73R3_101R2	8	3	5	1R1-7-8|2R1-3R1-5-6-9-10R1-11-15-19|4R1-12-13|6BM36-11BM36-16R36-17R36-18R36|23-24|33|40R3-40R3G1CN4-40R3G1CN5-43R3-43R3G1CN4-43R3G1CN5-49R3-49R3G1CN4-49R3G1CN5|40R3G1CN6-43R3G1CN6-49R3G1CN6-73R3-101R2	296471000	170264000	126207000	44057000	37
68	68T	'08/2389	'982009104839923	Matched	Clade_A1	Clade_A1-3A2	DFT1_3	DFT1_3A2a	1828A>G;3255G>A;3430T>A;4311G>A	Forestier	-42.902220999999997	147.83382900000001	2008	28/08/2008	DFT1	Tissue	No	Yes	Yes	Facial/oral				Singleton		0.85599999999999998	0.872	0.92700000000000005	0.86399999999999999	Yes	Yes	M	2	No data (confirmed)			19	11	8	1R1_2R1_3R1_4R1_5_6_7_8_9_10R1_11_12_13_15_19_23_24_123_1830	5	2	3	1R1-7-8|2R1-3R1-5-6-9-10R1-11-15-19|4R1-12-13|23-24|123-1830	354900000	238600000	116300000	122300000	19
70	70T1	'08/2481	'982009104810296	Matched	Clade_A1	Clade_A1-3A2	DFT1_3	DFT1_3A2a	1828A>G;3255G>A;3430T>A;4311G>A	Forestier	-42.902220999999997	147.83382900000001	2008	31/07/2008	DFT1	Tissue	No	Yes	Yes	Facial/oral				Singleton		0.90600000000000003	0.93300000000000005	0.94	0.91949999999999998	Yes	Yes	F	2	No data			19	11	8	1R1_2R1_3R1_4R1_5_6_7_8_9_10R1_11_12_13_15_19_23_24_123_1830	5	2	3	1R1-7-8|2R1-3R1-5-6-9-10R1-11-15-19|4R1-12-13|23-24|123-1830	354900000	238600000	116300000	122300000	17
71	71T1	Unknown	'982009100799027	Matched	Clade_A1	Clade_A1-3A	DFT1_3	DFT1_3A	1828A>G;3255G>A	Forestier	-42.902220999999997	147.83382900000001	2008	02/08/2008	DFT1	Tissue	No	Yes	Yes	Facial/oral				Multiple		0.875	0.86699999999999999	0.877	0.871	Yes	Yes	F	2	No data			18	10	8	1R1_2R1_3R1_4R1_5_6_7_8_9_10R1_11_12_13_15_19_23_24_109	5	2	3	1R1-7-8|2R1-3R1-5-6-9-10R1-11-15-19|4R1-12-13|23-24|109	277200000	160900000	116300000	44600000	18
71	71T2	Unknown	'982009100799027	Matched	Clade_A1	Clade_A1-3A	DFT1_3	DFT1_3A	1828A>G;3255G>A	Forestier	-42.902220999999997	147.83382900000001	2008	02/08/2008	DFT1	Tissue	No	Yes	Yes	Facial/oral				Multiple		0.77800000000000002	0.77200000000000002	0.83299999999999996	0.77500000000000002	Yes	Yes	F	2	No data			20	12	8	1R1_2R1_3R1_4R1_5_6_7_8_9_10R1_11_12_13_15_19_23_24_43R5_49R9_109	6	3	3	1R1-7-8|2R1-3R1-5-6-9-10R1-11-15-19|4R1-12-13|23-24|43R5-49R9|109	278541000	162241000	116300000	45941000	20
71	71T3	Unknown	'982009100799027	Matched	Clade_A1	Clade_A1-3A	DFT1_3	DFT1_3A	1828A>G;3255G>A	Forestier	-42.902220999999997	147.83382900000001	2008	02/08/2008	DFT1	Tissue	No	Yes	Yes	Facial/oral				Multiple		0.89700000000000002	0.89600000000000002	0.89	0.89649999999999996	Yes	Yes	F	2	No data			18	10	8	1R1_2R1_3R1_4R1_5_6_7_8_9_10R1_11_12_13_15_19_23_24_109	5	2	3	1R1-7-8|2R1-3R1-5-6-9-10R1-11-15-19|4R1-12-13|23-24|109	277200000	160900000	116300000	44600000	18
72	72T2	'08/2480	'982009104834357	Matched	Clade_A1	Clade_A1-3A	DFT1_3	DFT1_3A	1828A>G;3255G>A	Forestier	-42.902220999999997	147.83382900000001	2008	31/07/2008	DFT1	Tissue	No	Yes	Yes	Facial/oral				Singleton		0.86899999999999999	0.88500000000000001	0.89800000000000002	0.877	Yes	Yes	M	2	No data			18	9	9	1R1_2R1_3R1_4R1_5_6_7_8_9_10R1_11_12_13_15_19_23_24_33	5	1	4	1R1-7-8|2R1-3R1-5-6-9-10R1-11-15-19|4R1-12-13|23-24|33	277900000	159900000	118000000	41900000	18
75	75T	'07/2258	'982009100754517	Matched	Clade_A1	Clade_A1-3A2	DFT1_3	DFT1_3A2a	1828A>G;3255G>A;3430T>A;4311G>A	Forestier	-42.902220999999997	147.83382900000001	2007	19/07/2007	DFT1	Tissue	No	Yes	Yes	Unknown				Singleton		0.72	0.71499999999999997	0.83599999999999997	0.71750000000000003	Yes	Yes	M	Unknown	Strain 3			17	9	8	1R1_2R1_3R1_4R1_5_6_7_8_9_10R1_11_12_13_15_19_23_24	4	1	3	1R1-7-8|2R1-3R1-5-6-9-10R1-11-15-19|4R1-12-13|23-24	276200000	159900000	116300000	43600000	17
76	76T1	Unknown	'982009100303073	Matched	Clade_A1	Clade_A1-3A	DFT1_3	DFT1_3A	1828A>G;3255G>A	Forestier	-42.902220999999997	147.83382900000001	2007	23/07/2007	DFT1	Tissue	No	Yes	Yes	Unknown				Singleton		0.84199999999999997	0.83799999999999997	0.90900000000000003	0.84	Yes	Yes	M	Unknown	No data (confirmed)			18	9	9	1R1_2R1_3R1_4R1_5_6_7_8_9_10R1_11_12_13_15_19_23_24_33	5	1	4	1R1-7-8|2R1-3R1-5-6-9-10R1-11-15-19|4R1-12-13|23-24|33	277900000	159900000	118000000	41900000	18
77	77T2	'10/0130	'982009104849679	Matched	Clade_A1	Clade_A1-3A2	DFT1_3	DFT1_3A2a	1828A>G;3255G>A;3430T>A;4311G>A	Forestier	-42.902220999999997	147.83382900000001	2010	14/01/2010	DFT1	Tissue	No	Yes	Yes	Spleen		Metastasis		Singleton		0.9	Not Available	0.96499999999999997	0.9	No	Yes	M	4	Strain 3			18	9	9	1R1_2R1_3R1_4R1_5_6_7_8_9_9BM26_10R1_11_12_13_15_19_23_24	5	1	4	1R1-7-8|2R1-3R1-5-6-9-10R1-11-15-19|4R1-12-13|9BM26|23-24	279215499	159900000	119315499	40584501	18
78	78Ta	'10/0128	'982009104925238	Matched	Clade_A1	Clade_A1-3A5	DFT1_3	DFT1_3A5	1828A>G;1928T>C;3255G>A	Forestier	-42.902220999999997	147.83382900000001	2010	14/01/2010	DFT1	Tissue	No	Yes	Yes	Facial/oral	Lower front lip			Singleton		0.629	0.54500000000000004	0.57099999999999995	0.58699999999999997	Yes	Yes	F	2	No data (confirmed)	M5 gain		30	22	8	1R1_2R1_3R1_4R1_5_6_7_8_9_10R1_11_12_13_15_1803R3_285R3_19_23_24_40R7_109_460_461_462_464_465_466_1040_1808R2_1831R1	6	3	3	1R1-7-8|2R1-3R1-5-6-9-10R1-11-15-19|4R1-12-13|23-24|40R7-285R3-460-461-462-464-465-466-1040-1803R3-1808R2-1831R1|109	582807000	466507000	116300000	350207000	30
79	79Ta	'10/0134	'982009104840088	Matched	Clade_A1	Clade_A1-3A2	DFT1_3	DFT1_3A2a1	1828A>G;2731A>G;3255G>A;3430T>A;4311G>A	Forestier	-42.902220999999997	147.83382900000001	2010	14/01/2010	DFT1	Tissue	No	Yes	Yes	Facial/oral	Lower right lip			Singleton		0.48499999999999999	0.49099999999999999	0.749	0.48799999999999999	Yes	Yes	M	2	No data (confirmed)			17	9	8	1R1_2R1_3R1_4R1_5_6_7_8_9_10R1_11_12_13_15_19_23_24	4	1	3	1R1-7-8|2R1-3R1-5-6-9-10R1-11-15-19|4R1-12-13|23-24	276200000	159900000	116300000	43600000	17
80	80T1	'10/0135	'982009104789723	Matched	Clade_A1	Clade_A1-3A2	DFT1_3	DFT1_3A2a1	1828A>G;2731A>G;3255G>A;3430T>A;4311G>A	Forestier	-42.902220999999997	147.83382900000001	2010	14/01/2010	DFT1	Tissue	No	Yes	Yes	Neck	Left shoulder			Multiple		0.42299999999999999	0.40500000000000003	0.76600000000000001	0.41399999999999998	Yes	Yes	M	2	No data (confirmed)			17	9	8	1R1_2R1_3R1_4R1_5_6_7_8_9_10R1_11_12_13_15_19_23_24	4	1	3	1R1-7-8|2R1-3R1-5-6-9-10R1-11-15-19|4R1-12-13|23-24	276200000	159900000	116300000	43600000	17
80	80T2	'10/0135	'982009104789723	Matched	Clade_A1	Clade_A1-3A2	DFT1_3	DFT1_3A2a1	1828A>G;2731A>G;3255G>A;3430T>A;4311G>A	Forestier	-42.902220999999997	147.83382900000001	2010	14/01/2010	DFT1	Tissue	No	Yes	Yes	Facial/oral	upper palate			Multiple		0.54200000000000004	0.51500000000000001	0.64700000000000002	0.52849999999999997	Yes	Yes	M	2	No data (confirmed)			17	9	8	1R1_2R1_3R1_4R1_5_6_7_8_9_10R1_11_12_13_15_19_23_24	4	1	3	1R1-7-8|2R1-3R1-5-6-9-10R1-11-15-19|4R1-12-13|23-24	276200000	159900000	116300000	43600000	17
81	81T	'10/0129	'982009105195643	Matched	Clade_A1	Clade_A1-3A2	DFT1_3	DFT1_3A2a	1828A>G;3255G>A;3430T>A;4311G>A	Forestier	-42.902220999999997	147.83382900000001	2010	14/01/2010	DFT1	Tissue	No	Yes	Yes	Skin	Rump			Singleton		0.48499999999999999	0.54100000000000004	0.54800000000000004	0.51300000000000001	Yes	Yes	M	2	Strain 3			19	11	8	1R1_2R1_3R1_4R1_5_6_7_8_9_10R1_11_12_13_15_19_23_24_123_1830	5	2	3	1R1-7-8|2R1-3R1-5-6-9-10R1-11-15-19|4R1-12-13|23-24|123-1830	354900000	238600000	116300000	122300000	19
82	82T	Unknown	Unknown	Matched	Clade_B	Clade_B-3	DFT1_0	DFT1_0	Novariants	Magra	-42.718946000000003	147.06425400000001	2008	Unknown	DFT1	Tissue	No	Yes	Yes	Unknown				Singleton		0.78800000000000003	0.78800000000000003	Not Available	0.78800000000000003	Yes	Yes	F	2	No data			16	9	7	1R1_2R1_3R1_4R1_5_6_7_8_9_10R1_11_12_13_15_19_20R1	4	1	3	1R1-7-8|2R1-3R1-5-6-9-10R1-11-15-19|4R1-12-13|20R1	212000000	159900000	52100000	107800000	16
83	83T1	Unknown	Unknown	Matched	Clade_A1	Clade_A1-3A	DFT1_3	DFT1_3A	1828A>G;3255G>A	Copping	-42.823622999999998	147.790111	2008	Unknown	DFT1	Tissue	No	Yes	Yes	Unknown				Singleton		0.68	0.73699999999999999	0.84399999999999997	0.70850000000000002	Yes	Yes	F	2	No data			22	14	8	1R1_2R1_3R1_4R1_5_6_7_8_9_10R1_11_12_13_15_19_23_24_208_297_298_1026_1026G1CN4	7	4	3	1R1-7-8|2R1-3R1-5-6-9-10R1-11-15-19|4R1-12-13|23-24|208|297-298|1026-1026G1CN4	281600000	165300000	116300000	49000000	22
84	84T1	Unknown	Unknown	Matched	Clade_A1	Clade_A1-2	DFT1_0	DFT1_0	Novariants	Lovely Banks	-42.467559000000001	147.28025299999999	2006	24/07/2006	DFT1	Tissue	No	Yes	Yes	Kidney		Metastasis		Singleton		0.873	0.84799999999999998	Not Available	0.86050000000000004	Yes	Yes	F	Unknown	No data			20	9	11	1R1_2R1_3R1_4R1_5_6_7_8_9_10R1_11_12_13_15_19_23_24_67R3_200_414	5	1	4	1R1-7-8|2R1-3R1-5-6-9-10R1-11-15-19|4R1-12-13|23-24|67R3-200-414	281141000	159900000	121241000	38659000	20
85	85T	Unknown	'985120016084089	Unmatched	Clade_B	Clade_B-4	DFT1_4	DFT1_4	7198T>C	Fentonbury	-42.653722000000002	146.76054099999999	2005	Unknown	DFT1	Cell-Line	No	Yes	Yes	Facial/oral	Exterior back side of lip			Singleton		0.98199999999999998	0.99299999999999999	0.85699999999999998	0.98750000000000004	Yes	Yes	Unknown	Unknown	Strain 2	M5 loss		33	17	16	1R1_2R1_2R1BM19_3R1_3R1BM19_4R1_5_6_6BM23_7_8_9_9BM19_10R1_10R1BM19_11_11BM23_12_13_15_15BM19_16R23_19_20R1_25_34R19_35R19_36R19_37R19_38R19_39R19_69R11_405	7	2	5	1R1-7-8|2R1-3R1-5-6-9-10R1-11-15-19|2R1BM19-3R1BM19-6BM23-9BM19-10R1BM19-11BM23-15BM19-16R23|4R1-12-13|20R1|25|34R19-35R19-36R19-37R19-38R19-39R19-69R11-405	466100000	254200000	211900000	42300000	33
86	86T	Unknown	'985120016021248	Unmatched	Clade_B	Clade_B-4	DFT1_4	DFT1_4	7198T>C	Fentonbury	-42.653722000000002	146.76054099999999	2005	Unknown	DFT1	Cell-Line	No	Yes	No (time-course sample)	Facial/oral				Multiple	Time-course	0.98	Not Available	0.93700000000000006	0.98	No	Yes	Unknown	Unknown	Strain 2	M5 loss		33	15	18	1R1_2R1_2R1BM20_3R1_3R1BM20_4R1_5_6_6BM24_7_8_9_9BM20_10R1_10R1BM20_11_11BM24_12_13_15_15BM20_16R24_17R24_18R24_19_20R1_25_34R20_35R20_36R20_37R20_38R20_39R20	7	2	5	1R1-7-8|2R1-3R1-5-6-9-10R1-11-15-19|2R1BM20-3R1BM20-6BM24-9BM20-10R1BM20-11BM24-15BM20-16R24-17R24-18R24|4R1-12-13|20R1|25|34R20-35R20-36R20-37R20-38R20-39R20	453107000	239800000	213307000	26493000	33
86	86T2	Unknown	'985120016021248	Unmatched	Clade_B	Clade_B-4	DFT1_4	DFT1_4	7198T>C	Fentonbury	-42.653722000000002	146.76054099999999	2005	Unknown	DFT1	Cell-Line	No	Yes	Yes	Facial/oral				Multiple		0.98599999999999999	Not Available	0.98299999999999998	0.98599999999999999	No	Yes	Unknown	Unknown	Strain 2	M5 loss		33	15	18	1R1_2R1_2R1BM20_3R1_3R1BM20_4R1_5_6_6BM24_7_8_9_9BM20_10R1_10R1BM20_11_11BM24_12_13_15_15BM20_16R24_17R24_18R24_19_20R1_25_34R20_35R20_36R20_37R20_38R20_39R20	7	2	5	1R1-7-8|2R1-3R1-5-6-9-10R1-11-15-19|2R1BM20-3R1BM20-6BM24-9BM20-10R1BM20-11BM24-15BM20-16R24-17R24-18R24|4R1-12-13|20R1|25|34R20-35R20-36R20-37R20-38R20-39R20	453107000	239800000	213307000	26493000	33
87	87T	Unknown	Unknown	Unmatched	Clade_A1	Clade_A1-3A3	DFT1_3	DFT1_3A3a	1828A>G;2572G>A;3255G>A;16137G>A	Forestier	-42.902220999999997	147.83382900000001	2007	Unknown	DFT1	Cell-Line	No	Yes	Yes	Unknown				Multiple		0.95499999999999996	Not Available	0.95899999999999996	0.95499999999999996	No	Yes	Unknown	Unknown	Strain 3	M5 loss		34	15	19	1R1_2R1_2R1BM4_3R1_3R1BM4_4R1_5_6_6BM6_7_8_9_9BM4_10R1_10R1BM4_11_11BM6_12_13_15_15BM4_16R6_17R6_18R6_19_23_24_33_34R4_35R4_36R4_37R4_38R4_39R4	8	2	6	1R1-7-8|2R1-3R1-5-6-9-10R1-11-15-19|2R1BM4-3R1BM4-9BM4-10R1BM4-15BM4|4R1-12-13|6BM6-11BM6-16R6-17R6-18R6|23-24|33|34R4-35R4-36R4-37R4-38R4-39R4	518507000	239800000	278707000	-38907000	34
87	87T2	Unknown	Unknown	Unmatched	Clade_A1	Clade_A1-3A3	DFT1_3	DFT1_3A3a	1828A>G;2572G>A;3255G>A;16137G>A	Forestier	-42.902220999999997	147.83382900000001	2007	Unknown	DFT1	Cell-Line	No	Yes	No (time-course sample)	Unknown				Multiple	Time-course	0.98399999999999999	Not Available	0.97599999999999998	0.98399999999999999	No	Yes	Unknown	Unknown	Strain 3	M5 loss		50	31	19	1R1_2R1_2R1BM4_3R1_3R1BM4_4R1_5_6_6BM6_7_8_9_9BM4_10R1_10R1BM4_11_11BM6_12_13_15_15BM4_16R6_17R6_18R6_19_23_24_33_34R4_35R4_36R4_37R4_38R4_39R4_40R2_40R2G1CN4_43R2_48R2_48R2G1CN4_49R2_49R2G1CN4_54R1_54R1G1CN4_73R1_73R1G1CN4_78R1_78R1G1CN4_84_85_85G1CN4	9	3	6	1R1-7-8|2R1-3R1-5-6-9-10R1-11-15-19|2R1BM4-3R1BM4-9BM4-10R1BM4-15BM4|4R1-12-13|6BM6-11BM6-16R6-17R6-18R6|23-24|33|34R4-35R4-36R4-37R4-38R4-39R4|40R2-40R2G1CN4-43R2-48R2-48R2G1CN4-49R2-49R2G1CN4-54R1-54R1G1CN4-73R1-73R1G1CN4-78R1-78R1G1CN4-84-85-85G1CN4	610848000	332141000	278707000	53434000	50
88	88T	Unknown	Unknown	Matched	Clade_A1	Clade_A1-1	DFT1_0	DFT1_0	Novariants	Freycinet	-42.194752999999999	148.30324300000001	2007	Unknown	DFT1	Cell-Line	No	Yes	Yes	Unknown				Multiple		0.97199999999999998	Not Available	0.219	0.97199999999999998	No	Yes	M	Unknown	Strain 4	M5 loss		43	25	18	1R1_2R1_2R1BM3_3R1_3R1BM3_4R1_5_6_6BM1_7_8_9_9BM3_10R1_10R1BM3_11_11BM1_12_13_15_15BM3_16R1_17R1_18R1_19_34R3_35R3_36R3_37R3_38R3_39R3_48R1_55R1_56R1_63_63G1CN4_64_64G1CN4_65_65G1CN4_66_70_1832	8	3	5	1R1-7-8|2R1-3R1-5-6-9-10R1-11-15-19|2R1BM3-3R1BM3-6BM1-9BM3-10R1BM3-11BM1-15BM3-16R1-17R1-18R1|4R1-12-13|34R3-35R3-36R3-37R3-38R3-39R3|48R1-55R1-56R1-63-63G1CN4-64-64G1CN4-65-65G1CN4-66|70|1832	491007000	277600000	213407000	64193000	36
88	88T2	Unknown	Unknown	Matched	Clade_A1	Clade_A1-1	DFT1_0	DFT1_0	Novariants	Freycinet	-42.194752999999999	148.30324300000001	2007	Unknown	DFT1	Cell-Line	No	Yes	No (time-course sample)	Unknown				Multiple	Time-course	0.97499999999999998	Not Available	Not Available	0.97499999999999998	No	Yes	M	Unknown	Strain 4	M5 loss		43	25	18	1R1_2R1_2R1BM3_3R1_3R1BM3_4R1_5_6_6BM1_7_8_9_9BM3_10R1_10R1BM3_11_11BM1_12_13_15_15BM3_16R1_17R1_18R1_19_34R3_35R3_36R3_37R3_38R3_39R3_48R1_55R1_56R1_63_63G1CN4_64_64G1CN4_65_65G1CN4_66_70_1832	8	3	5	1R1-7-8|2R1-3R1-5-6-9-10R1-11-15-19|2R1BM3-3R1BM3-6BM1-9BM3-10R1BM3-11BM1-15BM3-16R1-17R1-18R1|4R1-12-13|34R3-35R3-36R3-37R3-38R3-39R3|48R1-55R1-56R1-63-63G1CN4-64-64G1CN4-65-65G1CN4-66|70|1832	491007000	277600000	213407000	64193000	36
90	90T	Unknown	Unknown	Unmatched	Clade_A1	Clade_A1-3A3	DFT1_3	DFT1_3A3a	1828A>G;2572G>A;3255G>A;16137G>A	Forestier	-42.902220999999997	147.83382900000001	2007	Unknown	DFT1	Cell-Line	No	Yes	No (time-course sample)	Unknown				Multiple		0.97	Not Available	0.95799999999999996	0.97	No	Yes	Unknown	Unknown	No data (confirmed)	M5 loss		34	15	19	1R1_2R1_2R1BM4_3R1_3R1BM4_4R1_5_6_6BM6_7_8_9_9BM4_10R1_10R1BM4_11_11BM6_12_13_15_15BM4_16R6_17R6_18R6_19_23_24_33_34R4_35R4_36R4_37R4_38R4_39R4	8	2	6	1R1-7-8|2R1-3R1-5-6-9-10R1-11-15-19|2R1BM4-3R1BM4-9BM4-10R1BM4-15BM4|4R1-12-13|6BM6-11BM6-16R6-17R6-18R6|23-24|33|34R4-35R4-36R4-37R4-38R4-39R4	518507000	239800000	278707000	-38907000	34
90	90T2	Unknown	Unknown	Unmatched	Clade_A1	Clade_A1-3A3	DFT1_3	DFT1_3A3a	1828A>G;2572G>A;3255G>A;16137G>A	Forestier	-42.902220999999997	147.83382900000001	2007	Unknown	DFT1	Cell-Line	No	Yes	No (time-course sample)	Unknown				Multiple	Time-course	0.96799999999999997	Not Available	0.95899999999999996	0.96799999999999997	No	Yes	Unknown	Unknown	No data (confirmed)	M5 loss		54	31	23	1R1_2R1_2R1BM4_3R1_3R1BM4_4R1_5_5BM1_6_6BM6_7_8_9_9BM4_10R1_10R1BM4_11_11BM6_12_13_15_15BM4_16R6_17R6_18R6_19_23_24_33_34R4_35R4_36R4_37R4_38R4_39R4_40R2_40R2G1CN4_43R2_48R2_48R2G1CN4_49R2_49R2G1CN4_54R1_54R1G1CN4_73R1_73R1G1CN4_78R1_78R1G1CN4_84_85_85G1CN4_146_147_148	10	3	7	1R1-7-8|2R1-3R1-5-6-9-10R1-11-15-19|2R1BM4-3R1BM4-9BM4-10R1BM4-15BM4|4R1-12-13|5BM1-146-147-148|6BM6-11BM6-16R6-17R6-18R6|23-24|33|34R4-35R4-36R4-37R4-38R4-39R4|40R2-40R2G1CN4-43R2-48R2-48R2G1CN4-49R2-49R2G1CN4-54R1-54R1G1CN4-73R1-73R1G1CN4-78R1-78R1G1CN4-84-85-85G1CN4	643848000	332141000	311707000	20434000	54
92	92T	Unknown	'00068B0911	Unmatched	Clade_A1	Clade_A1-3A	DFT1_3	DFT1_3A	1828A>G;3255G>A	Hobart (captive)	-	-	2010	Unknown	DFT1	Experimental transmission (cell-line)	Experimental transmission (cell-line; inoculation date: unknown)	Yes	No (time-course sample)	Facial/oral (experimentally inoculated)	left side of face			Singleton		0.92100000000000004	0.93100000000000005	0.90700000000000003	0.92600000000000005	Yes	Yes	M	Unknown	No data	M5 loss		22	11	11	1R1_2R1_3R1_4R1_5_6_6BM3_7_8_9_10R1_11_11BM3_12_13_15_16R3_19_23_24_49R10_428R1	6	2	4	1R1-7-8|2R1-3R1-5-6-9-10R1-11-15-19|4R1-12-13|6BM3-11BM3-16R3|23-24|49R10-428R1	285200000	162100000	123100000	39000000	19
93	93T	'10/1109	'982009104234739	Matched	Clade_A1	Clade_A1-3A2	DFT1_3	DFT1_3A2a	1828A>G;3255G>A;3430T>A;4311G>A	Forestier	-42.902220999999997	147.83382900000001	2010	15/04/2010	DFT1	Tissue	No	Yes	Yes	Unknown				Singleton		0.33400000000000002	0.33500000000000002	0.498	0.33450000000000002	Yes	Yes	M	Unknown	No data (confirmed)			17	9	8	1R1_2R1_3R1_4R1_5_6_7_8_9_10R1_11_12_13_15_19_23_24	4	1	3	1R1-7-8|2R1-3R1-5-6-9-10R1-11-15-19|4R1-12-13|23-24	276200000	159900000	116300000	43600000	17
94	94T	'10/1112	'982009104876128	Matched	Clade_A1	Clade_A1-3A2	DFT1_3	DFT1_3A2a1	1828A>G;2731A>G;3255G>A;3430T>A;4311G>A	Forestier	-42.902220999999997	147.83382900000001	2010	14/04/2010	DFT1	Tissue	No	Yes	Yes	Unknown				Singleton		0.84099999999999997	0.875	0.91	0.85799999999999998	Yes	Yes	M	Unknown	Strain 3			18	9	9	1R1_2R1_3R1_4R1_5_6_7_8_9_10R1_11_12_13_15_19_23_24_301	5	1	4	1R1-7-8|2R1-3R1-5-6-9-10R1-11-15-19|4R1-12-13|23-24|301	277200000	159900000	117300000	42600000	18
95	95T	'09/4467	Unknown	Matched	Clade_A2	Clade_A2-6	DFT1_6	DFT1_6D	3161G>A;14209A>T	Geeveston	-43.146940999999998	146.90719100000001	2009	30/11/2009	DFT1	Cell-Line	No	Yes	Yes	Unknown				Singleton		0.98399999999999999	0.997	0.98099999999999998	0.99050000000000005	Yes	Yes	M	Unknown	Strain 2 polyploid	M5 loss		36	17	19	1R1_2R1_2R1BM10_3R1_3R1BM10_4R1_5_6_6BM14_7_8_9_9BM10_10R1_10R1BM10_11_11BM14_12_13_15_15BM10_16R14_17R14_18R14_19_22_26_27R1_34R10_35R10_36R10_37R10_38R10_39R10_56R3_69R12	7	2	5	1R1-7-8|2R1-3R1-5-6-9-10R1-11-15-19|2R1BM10-3R1BM10-6BM14-9BM10-10R1BM10-11BM14-15BM10-16R14-17R14-18R14|4R1-12-13|22|26-27R1|34R10-35R10-36R10-37R10-38R10-39R10-56R3-69R12	497107000	254200000	242907000	11293000	36
96	96T	'04/3089	'982009101668435	Unmatched	Clade_A2	Clade_A2-1	DFT1_0	DFT1_0	Novariants	Bronte Park	-42.124875000000003	146.46679	2004	17/11/2004	DFT1	Cell-Line	No	Yes	Yes	Unknown				Singleton		0.995	1.014	Not Available	1.0044999999999999	Yes	Yes	Unknown	3	Strain 1	M5 loss		47	29	18	1R1_2R1_2R1BM5_3R1_3R1BM5_4R1_5_6_6BM7_7_7BM1_8_9_9BM5_10R1_10R1BM5_11_11BM7_12_13_15_15BM5_16R7_17R7_18R7_19_34R5_35R5_36R5_37R5_38R5_39R5_88_95_193R1_194R1_376_377_378_379R1_380_381_382_834R1_1029R2_1038_1079R2	6	2	4	1R1-7-8|2R1-3R1-5-6-9-10R1-11-15-19|2R1BM5-3R1BM5-9BM5-10R1BM5-15BM5|4R1-12-13|6BM7-11BM7-16R7-17R7-18R7-88-95|7BM1-34R5-35R5-36R5-37R5-38R5-39R5-193R1-194R1-376-377-378-379R1-380-381-382-834R1-1029R2-1038-1079R2	672907000	459300000	213607000	245693000	42
98	98T1	'10/1140	'982009105169257	Matched	Clade_A1	Clade_A1-3A2	DFT1_3	DFT1_3A2a	1828A>G;3255G>A;3430T>A;4311G>A	Forestier	-42.902220999999997	147.83382900000001	2010	19/04/2010	DFT1	Tissue	No	Yes	Yes	Unknown				Singleton		0.86399999999999999	Not Available	0.88300000000000001	0.86399999999999999	No	Yes	M	2	No data (confirmed)			17	9	8	1R1_2R1_3R1_4R1_5_6_7_8_9_10R1_11_12_13_15_19_23_24	4	1	3	1R1-7-8|2R1-3R1-5-6-9-10R1-11-15-19|4R1-12-13|23-24	276200000	159900000	116300000	43600000	17
99	99T3	'10/1141	'982009104879401	Matched	Clade_A1	Clade_A1-3A2	DFT1_3	DFT1_3A2a1	1828A>G;2731A>G;3255G>A;3430T>A;4311G>A	Forestier	-42.902220999999997	147.83382900000001	2010	19/04/2010	DFT1	Tissue	No	Yes	Yes	Unknown				Singleton		0.89400000000000002	0.88900000000000001	0.92800000000000005	0.89149999999999996	Yes	Yes	M	2	No data (confirmed)			17	9	8	1R1_2R1_3R1_4R1_5_6_7_8_9_10R1_11_12_13_15_19_23_24	4	1	3	1R1-7-8|2R1-3R1-5-6-9-10R1-11-15-19|4R1-12-13|23-24	276200000	159900000	116300000	43600000	17
100	100T1	'10/1142	'982009104925396	Matched	Clade_A1	Clade_A1-3A2	DFT1_3	DFT1_3A2a1	1828A>G;2731A>G;3255G>A;3430T>A;4311G>A	Forestier	-42.902220999999997	147.83382900000001	2010	16/04/2010	DFT1	Tissue	No	Yes	Yes	Unknown				Singleton		0.73599999999999999	0.75600000000000001	0.83299999999999996	0.746	Yes	Yes	M	2	No data (confirmed)			18	10	8	1R1_2R1_3R1_4R1_5_6_7_8_9_10R1_11_12_13_15_19_23_24_135	5	2	3	1R1-7-8|2R1-3R1-5-6-9-10R1-11-15-19|4R1-12-13|23-24|135	277400000	161100000	116300000	44800000	18
101	101T1	'10/1673	'MTP000000101673	Matched (MIPs Only)	Clade_B	Clade_B-5	DFT1_2	DFT1_2E	2344T>C;14114C>T	Buckland	-42.613394	147.70647	2010	31/05/2010	DFT1	Tissue	No	Yes	Yes	Facial/oral				Multiple		0.72	0.72199999999999998	0.78200000000000003	0.72099999999999997	Yes	Yes	F	2	No data (confirmed)			19	9	10	1R1_2R1_3R1_4R1_5_6_7_8_9_10R1_11_12_13_15_19_20R1_21R1_25_814	7	1	6	1R1-7-8|2R1-3R1-5-6-9-10R1-11-15-19|4R1-12-13|20R1|21R1|25|814	253900000	159900000	94000000	65900000	18
101	101T2	'10/1673	'MTP000000101673	Matched (MIPs Only)	Clade_D	Clade_D	DFT1_0	DFT1_0	Novariants	Buckland	-42.613394	147.70647	2010	31/05/2010	DFT1	Tissue	No	Yes	Yes	Facial/oral				Multiple		0.83	0.84199999999999997	Not Available	0.83599999999999997	Yes	Yes	F	2	No data (confirmed)			22	15	7	1R1_2R1_3R1_4R1_5_6_7_8_9_10R1_11_12_13_15_19_116R1_121R1_206_357_358_359_360	5	2	3	1R1-7-8|2R1-3R1-5-6-9-10R1-11-15-19|4R1-12-13|116R1-121R1-206-357-358-359|360	257600000	205400000	52200000	153200000	22
102	102T2	'10/1693	'982009106034997	Matched (MIPs Only)	Clade_D	Clade_D	DFT1_0	DFT1_0	Novariants	Buckland	-42.613394	147.70647	2010	01/06/2010	DFT1	Tissue	No	Yes	Yes	Unknown				Singleton		0.93600000000000005	Not Available	Not Available	0.93600000000000005	No	Yes	M	2	No data (confirmed)			23	15	8	1R1_2R1_3R1_4R1_5_6_7_8_9_10R1_11_12_13_15_19_116R1_121R1_206_357_358_359_360_980	6	2	4	1R1-7-8|2R1-3R1-5-6-9-10R1-11-15-19|4R1-12-13|116R1-121R1-206-357-358-359|360|980	267900000	205400000	62500000	142900000	23
103	103T	Unknown	'982009106180012	Matched	Clade_C	Clade_C-3	DFT1_5	DFT1_5	2681C>T	West Pencil Pine	-41.717464999999997	145.85587000000001	2010	01/05/2010	DFT1	Tissue	No	Yes	Yes	Unknown				Singleton		0.65200000000000002	0.67	0.72699999999999998	0.66100000000000003	Yes	Yes	M	3	No data (confirmed)	M5 loss		20	9	11	1R1_2R1_3R1_4R1_5_6_6BM33_7_8_9_10R1_11_11BM33_12_13_15_16R33_17R33_18R33_19	4	1	3	1R1-7-8|2R1-3R1-5-6-9-10R1-11-15-19|4R1-12-13|6BM33-11BM33-16R33-17R33-18R33	219207000	159900000	59307000	100593000	13
104	104T	Unknown	'982009105179063	Matched	Clade_A2	Clade_A2-10	DFT1_0	DFT1_0	Novariants	West Pencil Pine	-41.717464999999997	145.85587000000001	2010	01/02/2010	DFT1	Tissue	No	Yes	Yes	Unknown				Singleton		0.42	0.46	0.69	0.44	Yes	Yes	F	2	Strain 1 tetraploid	M5 loss		29	14	15	1R1_2R1_3R1_4R1_5_6_6BM17_7_8_9_10R1_10R1G1CN4_11_11BM17_12_13_15_15G1CN4_16R17_17R17_18R17_19_22_26_27R1_93G1CN4_93G1CN5_102G1CN4_158	8	2	6	1R1-7-8|2R1-3R1-5-6-9-10R1-11-15-19|4R1-12-13|6BM17-11BM17-16R17-17R17-18R17|10R1G1CN4-15G1CN4-93G1CN4-93G1CN5-102G1CN4|22|26-27R1|158	262407000	167700000	94707000	72993000	29
105	105T	Unknown	'982009105161869	Matched	Clade_A2	Clade_A2-10	DFT1_0	DFT1_0	Novariants	West Pencil Pine	-41.717464999999997	145.85587000000001	2010	01/05/2010	DFT1	Tissue	No	Yes	Yes	Unknown				Singleton		0.73	0.70699999999999996	0.71	0.71850000000000003	Yes	Yes	F	Unknown	Strain 1 evolved tetraploid	M5 loss		35	20	15	1R1_2R1_3R1_4R1_5_6_6BM17_7_8_9_10R1_10R1G1CN4_10R1G1CN5_11_11BM17_12_13_15_15G1CN4_15G1CN5_16R17_17R17_18R17_19_22_26_27R1_93G1CN4_93G1CN5_93G1CN6_93G1CN7_93G1CN8_102G1CN4_102G1CN5_158	12	6	6	1R1-7-8|2R1-3R1-5-6-9-10R1-11-15-19|4R1-12-13|6BM17-11BM17-16R17-17R17-18R17|10R1G1CN4-15G1CN4-93G1CN4-93G1CN5-102G1CN4|10R1G1CN5-15G1CN5-102G1CN5|22|26-27R1|93G1CN6|93G1CN7|93G1CN8|158	272507000	177800000	94707000	83093000	35
106	106T1	'10/2430	'0006444E9C	Matched	Non-DFTD	Non-DFTD	Non-DFTD	Non-DFTD	-	Mole Creek (captive)	-41.552312999999998	146.45533829999999	2010	04/08/2010	Non-DFTD	Tissue	No	No (not DFT1)	No (not DFT1)	Skin	Abdomen	Metastasis	Lymphoma (cutaneous)	Multiple		Not Available	Not Available	Not Available	N/A	No	Yes	F	5	Non-DFTD			14	8	6	1051_1076_1078_1079R1_1080_1084_1085_1086_1088_1089_1090_1091_1724R1_1831R4	2	1	1	1051-1076-1078-1079R1-1080-1084-1085-1831R4|1086-1088-1089-1090-1091-1724R1	298300000	278900000	19400000	259500000	5
106	106T2	'10/2430	'0006444E9C	Matched	Non-DFTD	Non-DFTD	Non-DFTD	Non-DFTD	-	Mole Creek (captive)	-41.552312999999998	146.45533829999999	2010	04/08/2010	Non-DFTD	Tissue	No	No (not DFT1)	No (not DFT1)	Skin		Metastasis	Lymphoma (cutaneous)	Multiple		Not Available	Not Available	Not Available	N/A	No	Yes	F	5	Non-DFTD			14	8	6	1051_1076_1078_1079R1_1080_1084_1085_1086_1088_1089_1090_1091_1724R1_1831R4	2	1	1	1051-1076-1078-1079R1-1080-1084-1085-1831R4|1086-1088-1089-1090-1091-1724R1	298300000	278900000	19400000	259500000	5
106	106T3	'10/2430	'0006444E9C	Matched	Non-DFTD	Non-DFTD	Non-DFTD	Non-DFTD	-	Mole Creek (captive)	-41.552312999999998	146.45533829999999	2010	04/08/2010	Non-DFTD	Tissue	No	No (not DFT1)	No (not DFT1)	Skin	Base of tail	Metastasis	Lymphoma (cutaneous)	Multiple		Not Available	Not Available	Not Available	N/A	No	Yes	F	5	Non-DFTD			14	8	6	1051_1076_1078_1079R1_1080_1084_1085_1086_1088_1089_1090_1091_1724R1_1831R4	2	1	1	1051-1076-1078-1079R1-1080-1084-1085-1831R4|1086-1088-1089-1090-1091-1724R1	298300000	278900000	19400000	259500000	5
107	107T1	'10/2448	'982009104864698	Matched	Clade_A1	Clade_A1-3A2	DFT1_3	DFT1_3A2a1A	1828A>G;2731A>G;3255G>A;3430T>A;4311G>A;11064G>A	Forestier	-42.902220999999997	147.83382900000001	2010	14/05/2010	DFT1	Tissue	No	Yes	Yes	Unknown				Multiple		0.67900000000000005	0.70499999999999996	0.81499999999999995	0.69199999999999995	Yes	Yes	F	2	Strain 3	M5 loss		22	9	13	1R1_2R1_3R1_4R1_5_6_6BM5_7_8_9_10R1_11_11BM5_12_13_15_16R5_17R5_18R5_19_23_24	5	1	4	1R1-7-8|2R1-3R1-5-6-9-10R1-11-15-19|4R1-12-13|6BM5-11BM5-16R5-17R5-18R5|23-24	284407000	159900000	124507000	35393000	15
107	107T2	'10/2448	'982009104864698	Matched	Clade_A1	Clade_A1-3A2	DFT1_3	DFT1_3A2a1A	1828A>G;2731A>G;3255G>A;3430T>A;4311G>A;11064G>A	Forestier	-42.902220999999997	147.83382900000001	2010	14/05/2010	DFT1	Tissue	No	No (duplicate)	No (duplicate)	Unknown				Multiple	Duplicate DNA extraction from same tumour	0.73199999999999998	0.76500000000000001	0.84099999999999997	0.74850000000000005	Yes	Yes	F	2	Strain 3	M5 loss		22	9	13	1R1_2R1_3R1_4R1_5_6_6BM5_7_8_9_10R1_11_11BM5_12_13_15_16R5_17R5_18R5_19_23_24	5	1	4	1R1-7-8|2R1-3R1-5-6-9-10R1-11-15-19|4R1-12-13|6BM5-11BM5-16R5-17R5-18R5|23-24	284407000	159900000	124507000	35393000	15
108	108T1	'10/2449	'982009106165902	Matched (MIPs Only)	Clade_A2	Clade_A2-8	DFT1_1	DFT1_1	10133C>T	Narawntapu	-41.139961999999997	146.64416399999999	2010	10/06/2010	DFT1	Tissue	No	Yes	Yes	Unknown				Singleton		0.93500000000000005	0.94799999999999995	Not Available	0.9415	Yes	Yes	F	Unknown	Strain 1 evolved tetraploid	M5 loss	Tetraploid (5)	25	9	16	1R1_2R1_3R1_4R1_5_6_6BM17_7_8_9_10R1_11_11BM17_12_13_15_16R17_17R17_18R17_19_22_26_27R1_80_984	7	1	6	1R1-7-8|2R1-3R1-5-6-9-10R1-11-15-19|4R1-12-13|6BM17-11BM17-16R17-17R17-18R17|22|26-27R1|80-984	308607000	159900000	148707000	11193000
109	109T1	'10/1843	'982009104878613	Matched	Clade_A1	Clade_A1-3A2	DFT1_3	DFT1_3A2a1	1828A>G;2731A>G;3255G>A;3430T>A;4311G>A	Forestier	-42.902220999999997	147.83382900000001	2010	11/06/2010	DFT1	Tissue	No	Yes	Yes	Unknown				Singleton		0.754	0.76500000000000001	0.91200000000000003	0.75949999999999995	Yes	Yes	F	2	No data (confirmed)	M5 loss		22	9	13	1R1_2R1_3R1_4R1_5_6_6BM5_7_8_9_10R1_11_11BM5_12_13_15_16R5_17R5_18R5_19_23_24	5	1	4	1R1-7-8|2R1-3R1-5-6-9-10R1-11-15-19|4R1-12-13|6BM5-11BM5-16R5-17R5-18R5|23-24	284407000	159900000	124507000	35393000	20
110	110T1	'10/1873	'982009106029841	Matched	Clade_B	Clade_B-4	DFT1_4	DFT1_4A1a	7198T>C;10399A>C;12288C>T;16084G>A	Latrobe	-41.249535000000002	146.40866399999999	2010	15/06/2010	DFT1	Tissue	No	Yes	Yes	Unknown				Singleton		0.91100000000000003	0.89800000000000002	0.9	0.90449999999999997	Yes	Yes	M	4	No data (confirmed)			17	9	8	1R1_2R1_3R1_4R1_5_6_7_8_9_10R1_11_12_13_15_19_20R1_25	5	1	4	1R1-7-8|2R1-3R1-5-6-9-10R1-11-15-19|4R1-12-13|20R1|25	212500000	159900000	52600000	107300000	17
111	111T1	'10/1819	'982009104919715	Matched (MIPs Only)	Clade_A1	Clade_A1-3A2	DFT1_3	DFT1_3A2a1	1828A>G;2731A>G;3255G>A;3430T>A;4311G>A	Forestier	-42.902220999999997	147.83382900000001	2010	10/06/2010	DFT1	Tissue	No	Yes	Yes	Unknown				Singleton		0.86799999999999999	0.85499999999999998	0.90800000000000003	0.86150000000000004	Yes	Yes	M	2	No data (confirmed)			17	9	8	1R1_2R1_3R1_4R1_5_6_7_8_9_10R1_11_12_13_15_19_23_24	4	1	3	1R1-7-8|2R1-3R1-5-6-9-10R1-11-15-19|4R1-12-13|23-24	276200000	159900000	116300000	43600000	17
112	112T2	'10/1874	'982009104928455	Matched	Clade_A1	Clade_A1-3A2	DFT1_3	DFT1_3A2a	1828A>G;3255G>A;3430T>A;4311G>A	Forestier	-42.902220999999997	147.83382900000001	2010	15/06/2010	DFT1	Tissue	No	Yes	Yes	Unknown				Singleton		0.79200000000000004	0.84199999999999997	0.78500000000000003	0.81699999999999995	Yes	Yes	M	2	No data (confirmed)			20	12	8	1R1_2R1_3R1_4R1_5_6_7_8_9_10R1_11_12_13_15_19_23_24_40R4_49R7_813	5	2	3	1R1-7-8|2R1-3R1-5-6-9-10R1-11-15-19|4R1-12-13|23-24|40R4-49R7-813	279000000	162700000	116300000	46400000	20
113	113T1	'10/2244	'982009104874627	Matched	Clade_A1	Clade_A1-3A2	DFT1_3	DFT1_3A2a	1828A>G;3255G>A;3430T>A;4311G>A	Forestier	-42.902220999999997	147.83382900000001	2010	19/07/2010	DFT1	Tissue	No	Yes	Yes	Unknown				Singleton		0.80400000000000005	0.83499999999999996	0.86099999999999999	0.81950000000000001	Yes	Yes	F	4	No data (confirmed)			17	9	8	1R1_2R1_3R1_4R1_5_6_7_8_9_10R1_11_12_13_15_19_23_24	4	1	3	1R1-7-8|2R1-3R1-5-6-9-10R1-11-15-19|4R1-12-13|23-24	276200000	159900000	116300000	43600000	17
114	114T	'10/2920	'982009105163278	Unmatched	Clade_A1	Clade_A1-3A3	DFT1_3	DFT1_3A3a	1828A>G;2572G>A;3255G>A;16137G>A	Hobart (captive)	-	-	2010	08/09/2010	DFT1	Experimental transmission (cell-line)	Experimental transmission (cell-line; inoculation date: unknown)	Yes	No (experimental transmission)	Unknown				Multiple		0.90500000000000003	0.93700000000000006	0.97299999999999998	0.92100000000000004	Yes	Yes	F	4	Strain 3 evolved	M5 loss		40	15	25	1R1_2R1_2R1BM4_3R1_3R1BM4_4R1_5_6_6BM6_7_8_9_9BM4_10R1_10R1BM4_11_11BM6_12_13_15_15BM4_16R6_17R6_18R6_19_21R7_23_24_33_34R4_35R4_36R4_37R4_38R4_39R4_429_430_431_432_433	9	2	7	1R1-7-8|2R1-3R1-5-6-9-10R1-11-15-19|2R1BM4-3R1BM4-9BM4-10R1BM4-15BM4|4R1-12-13|6BM6-11BM6-16R6-17R6-18R6|21R7-429-430-431-432-433|23-24|33|34R4-35R4-36R4-37R4-38R4-39R4	568707000	239800000	328907000	-89107000	40
115	115T1	'10/2621	'982009104960576	Matched	Clade_A1	Clade_A1-3A2	DFT1_3	DFT1_3A2a1	1828A>G;2731A>G;3255G>A;3430T>A;4311G>A	Forestier	-42.902220999999997	147.83382900000001	2010	13/09/2010	DFT1	Tissue	No	Yes	Yes	Unknown				Singleton		0.54700000000000004	Not Available	0.66200000000000003	0.54700000000000004	No	Yes	F	2	Strain 3 (some tetraploid and evolved)			18	10	8	1R1_2R1_3R1_4R1_5_6_7_8_9_10R1_11_12_13_15_19_23_24_135	5	2	3	1R1-7-8|2R1-3R1-5-6-9-10R1-11-15-19|4R1-12-13|23-24|135	277400000	161100000	116300000	44800000	18
117	117T	'10/1830	'982009104883696	Matched	Clade_A2	Clade_A2-8	DFT1_1	DFT1_1	10133C>T	Narawntapu	-41.139961999999997	146.64416399999999	2010	11/06/2010	DFT1	Tissue	No	Yes	Yes	Unknown				Singleton		0.89600000000000002	0.88300000000000001	0.89800000000000002	0.88949999999999996	Yes	Yes	M	Unknown	Strain 1 tetraploid	M5 loss	Tetraploid (5)	25	9	16	1R1_2R1_3R1_4R1_5_6_6BM17_7_8_9_10R1_11_11BM17_12_13_15_16R17_17R17_18R17_19_22_26_27R1_80_984	7	1	6	1R1-7-8|2R1-3R1-5-6-9-10R1-11-15-19|4R1-12-13|6BM17-11BM17-16R17-17R17-18R17|22|26-27R1|80-984	308607000	159900000	148707000	11193000
118	118T	'10/1837	'982009106039114	Matched	Clade_B	Clade_B-9	Unknown	Unknown	Unknown	Narawntapu	-41.139961999999997	146.64416399999999	2010	11/06/2010	DFT1	Tissue	No	Yes	Yes	Unknown				Singleton		Not Available	0.878	Not Available	0.878	Yes	No	M	3	Strain 2	No data
119	119T	'10/1838	'982009105380276	Matched	Clade_B	Clade_B-4	DFT1_4	DFT1_4A1a	7198T>C;10399A>C;12288C>T;16084G>A	Narawntapu	-41.139961999999997	146.64416399999999	2010	11/06/2010	DFT1	Tissue	No	Yes	Yes	Unknown				Singleton		0.81899999999999995	0.82799999999999996	0.65100000000000002	0.82350000000000001	Yes	Yes	M	3	Strain 2			17	9	8	1R1_2R1_3R1_4R1_5_6_7_8_9_10R1_11_12_13_15_19_20R1_25	5	1	4	1R1-7-8|2R1-3R1-5-6-9-10R1-11-15-19|4R1-12-13|20R1|25	212500000	159900000	52600000	107300000	17
120	120T	Unknown	'982009104255241	Matched (MIPs Only)	Clade_A2	Clade_A2-11	DFT1_0	DFT1_0	Novariants	West Pencil Pine	-41.717464999999997	145.85587000000001	2010	13/09/2010	DFT1	Tissue	No	No (missing data)	Yes	Unknown				Singleton		0.13300000000000001	Not Available	0.47299999999999998	0.13300000000000001	No	No	M	2	No data (confirmed)	No data
121	121T	Unknown	'982009105146482	Matched	Clade_C	Clade_C-3	DFT1_5	DFT1_5	2681C>T	West Pencil Pine	-41.717464999999997	145.85587000000001	2010	13/09/2010	DFT1	Tissue	No	Yes	Yes	Unknown				Singleton		0.71599999999999997	0.72599999999999998	0.79400000000000004	0.72099999999999997	Yes	Yes	F	4	No data (confirmed)			16	9	7	1R1_2R1_3R1_4R1_5_6_7_8_9_10R1_11_12_13_15_19_348	4	1	3	1R1-7-8|2R1-3R1-5-6-9-10R1-11-15-19|4R1-12-13|348	214000000	159900000	54100000	105800000	16
122	122T1	Unknown	'982009104325244	Matched	Clade_A2	Clade_A2-10	DFT1_0	DFT1_0	Novariants	West Pencil Pine	-41.717464999999997	145.85587000000001	2010	22/11/2010	DFT1	Tissue	No	Yes	Yes	Unknown				Singleton		0.68200000000000005	0.70199999999999996	0.77900000000000003	0.69199999999999995	Yes	Yes	F	3	No data (confirmed)	M5 loss		35	20	15	1R1_2R1_3R1_4R1_5_6_6BM17_7_8_9_10R1_10R1G1CN4_10R1G1CN5_11_11BM17_12_13_15_15G1CN4_15G1CN5_16R17_17R17_18R17_19_22_26_27R1_93G1CN4_93G1CN5_93G1CN6_93G1CN7_93G1CN8_102G1CN4_102G1CN5_1827	12	6	6	1R1-7-8|2R1-3R1-5-6-9-10R1-11-15-19|4R1-12-13|6BM17-11BM17-16R17-17R17-18R17|10R1G1CN4-15G1CN4-93G1CN4-93G1CN5-102G1CN4|10R1G1CN5-15G1CN5-102G1CN5|22|26-27R1|93G1CN6|93G1CN7|93G1CN8|1827	270407000	177800000	92607000	85193000	35
127	127T	'10/3847	'982009105139081	Matched	Clade_A2	Clade_A2-10	DFT1_0	DFT1_0	Novariants	West Pencil Pine	-41.717464999999997	145.85587000000001	2010	01/11/2010	DFT1	Tissue	No	Yes	Yes	Unknown				Singleton		0.52500000000000002	0.53500000000000003	0.621	0.53	Yes	Yes	M	Unknown	No data (confirmed)	M5 loss		34	19	15	1R1_2R1_3R1_4R1_5_6_6BM17_7_8_9_10R1_10R1G1CN4_10R1G1CN5_11_11BM17_12_13_15_15G1CN4_15G1CN5_16R17_17R17_18R17_19_22_26_27R1_93G1CN4_93G1CN5_93G1CN6_93G1CN7_102G1CN4_102G1CN5_158	11	5	6	1R1-7-8|2R1-3R1-5-6-9-10R1-11-15-19|4R1-12-13|6BM17-11BM17-16R17-17R17-18R17|10R1G1CN4-15G1CN4-93G1CN4-93G1CN5-102G1CN4|10R1G1CN5-15G1CN5-102G1CN5|22|26-27R1|93G1CN6|93G1CN7|158	270207000	175500000	94707000	80793000	34
128	128T1	'10/3803	'982009104888854	Matched	Clade_A2	Clade_A2-11	DFT1_0	DFT1_0	Novariants	West Pencil Pine	-41.717464999999997	145.85587000000001	2010	01/11/2010	DFT1	Tissue	No	Yes	Yes	Unknown				Multiple		0.83699999999999997	0.82799999999999996	Not Available	0.83250000000000002	Yes	Yes	F	2	No data (confirmed)	M5 loss		33	19	14	1R1_2R1_3R1_4R1_5_5G1CN4_5G1CN5_6_6BM17_7_8_9_10R1_11_11BM17_12_13_15_16R17_17R17_18R17_19_22_26_27R1_28R1_28R1G1CN4_29_29G1CN4_31_32_1834_1834G1CN4	9	4	5	1R1-7-8|2R1-3R1-5-6-9-10R1-11-15-19|4R1-12-13|5G1CN4-28R1-29-31-32-1834|5G1CN5|6BM17-11BM17-16R17-17R17-18R17|22|26-27R1|28R1G1CN4-29G1CN4-1834G1CN4	261107000	170700000	90407000	80293000	33
128	128T2	'10/3803	'982009104888854	Matched	Clade_A2	Clade_A2-11	DFT1_0	DFT1_0	Novariants	West Pencil Pine	-41.717464999999997	145.85587000000001	2010	01/11/2010	DFT1	Tissue	No	No (duplicate)	No (duplicate)	Unknown				Multiple	Duplicate DNA extraction from same tumour	0.65400000000000003	0.65	Not Available	0.65200000000000002	Yes	Yes	F	2	No data (confirmed)	M5 loss		32	18	14	1R1_2R1_3R1_4R1_5_5G1CN4_6_6BM17_7_8_9_10R1_11_11BM17_12_13_15_16R17_17R17_18R17_19_22_26_27R1_28R1_28R1G1CN4_29_29G1CN4_31_32_1834_1834G1CN4	8	3	5	1R1-7-8|2R1-3R1-5-6-9-10R1-11-15-19|4R1-12-13|5G1CN4-28R1-29-31-32-1834|6BM17-11BM17-16R17-17R17-18R17|22|26-27R1|28R1G1CN4-29G1CN4-1834G1CN4	260207000	169800000	90407000	79393000	32
131	131T	Unknown	Unknown	Matched (MIPs Only)	Non-DFTD	Non-DFTD	Non-DFTD	Non-DFTD	-	Copenhagen Zoo (captive)	-	-	2011	01/06/2011	Non-DFTD	Tissue	No	No (not DFT1)	No (not DFT1)	Spleen		Metastasis	Lymphoma	Singleton		Not Available	Not Available	Not Available	N/A	No	Yes	F	7	Non-DFTD			30	20	10	3R2_1864_59R4_98R4_889R3_1092_1093_1094_1095_1096_1097_1098_1099_1100_1101_1102_1103_1104_1105_1106_1107_1108_1109_1110_1111_1112_1115_1116_1117_1118	2	1	1	3R2-98R4-889R3-1092-1093-1095-1096-1098-1099-1101-1103-1105-1107-1109-1111-1115-1116-1117-1118-1864|59R4-1094-1097-1100-1102-1104-1106-1108-1110-1112	647700000	622500000	25200000	597300000	10
132	132T	'11/3909	'982000123133145	Matched	Clade_B	Clade_B-8	DFT1_2	DFT1_2	14114C>T	Bronte Park	-42.124875000000003	146.46679	2011	13/10/2011	DFT1	Tissue	No	Yes	Yes	Facial/oral	Lower left lip			Singleton		0.72699999999999998	0.70699999999999996	0.79900000000000004	0.71699999999999997	Yes	Yes	M	2	No data (confirmed)			25	16	9	1R1_2R1_3R1_4R1_5_6_7_8_9_10R1_11_12_13_15_19_20R1_21R1_25_295R2_522_523R1_524_525_526_527	7	2	5	1R1-7-8|2R1-3R1-5-6-9-10R1-11-15-19|4R1-12-13|20R1|21R1|25|295R2-522-523R1-524-525-526-527	284700000	219600000	65100000	154500000	21
134	134T1	'11/3917	'982000123128645	Matched	Clade_B	Clade_B-8	DFT1_2	DFT1_2	14114C>T	Bronte Park	-42.124875000000003	146.46679	2011	14/10/2011	DFT1	Tissue	No	Yes	Yes	Facial/oral	Lower left gum			Multiple		0.752	0.72899999999999998	0.78600000000000003	0.74050000000000005	Yes	Yes	M	3	Strain 2			18	9	9	1R1_2R1_3R1_4R1_5_6_7_8_9_10R1_11_12_13_15_19_20R1_21R1_25	6	1	5	1R1-7-8|2R1-3R1-5-6-9-10R1-11-15-19|4R1-12-13|20R1|21R1|25	225000000	159900000	65100000	94800000	18
134	134T2	'11/3917	'982000123128645	Matched	Clade_B	Clade_B-8	DFT1_2	DFT1_2C	8663A>T;14114C>T	Bronte Park	-42.124875000000003	146.46679	2011	14/10/2011	DFT1	Tissue	No	Yes	No (metastasis with matched primary)	Lymph node		Metastasis		Multiple		0.89800000000000002	0.872	0.92200000000000004	0.88500000000000001	Yes	Yes	M	3	Strain 2			20	9	11	1R1_2R1_3R1_4R1_5_6_7_8_9_10R1_11_12_13_15_19_20R1_21R1_25_543_544	7	1	6	1R1-7-8|2R1-3R1-5-6-9-10R1-11-15-19|4R1-12-13|20R1|21R1|25|543-544	244500000	159900000	84600000	75300000	20
134	134T3	'11/3917	'982000123128645	Matched	Clade_B	Clade_B-8	DFT1_2	DFT1_2	14114C>T	Bronte Park	-42.124875000000003	146.46679	2011	14/10/2011	DFT1	Tissue	No	Yes	No (metastasis with matched primary)	Muscle	Right hand trunk	Metastasis		Multiple		0.755	0.755	0.86299999999999999	0.755	Yes	Yes	M	3	Strain 2			18	9	9	1R1_2R1_3R1_4R1_5_6_7_8_9_10R1_11_12_13_15_19_20R1_21R1_25	6	1	5	1R1-7-8|2R1-3R1-5-6-9-10R1-11-15-19|4R1-12-13|20R1|21R1|25	225000000	159900000	65100000	94800000	18
134	134T4	'11/3917	'982000123128645	Matched	Clade_B	Clade_B-8	DFT1_2	DFT1_2	14114C>T	Bronte Park	-42.124875000000003	146.46679	2011	14/10/2011	DFT1	Tissue	No	Yes	No (metastasis with matched primary)	Muscle	Left hand trunk	Metastasis		Multiple		0.95399999999999996	0.91600000000000004	0.94499999999999995	0.93500000000000005	Yes	Yes	M	3	Strain 2			18	9	9	1R1_2R1_3R1_4R1_5_6_7_8_9_10R1_11_12_13_15_19_20R1_21R1_25	6	1	5	1R1-7-8|2R1-3R1-5-6-9-10R1-11-15-19|4R1-12-13|20R1|21R1|25	225000000	159900000	65100000	94800000	18
134	134T5	'11/3917	'982000123128645	Matched	Clade_B	Clade_B-8	DFT1_2	DFT1_2	14114C>T	Bronte Park	-42.124875000000003	146.46679	2011	14/10/2011	DFT1	Tissue	No	Yes	No (metastasis with matched primary)	Lung		Metastasis		Multiple		0.876	0.84099999999999997	0.91600000000000004	0.85850000000000004	Yes	Yes	M	3	Strain 2			20	11	9	1R1_2R1_3R1_4R1_5_6_7_8_9_10R1_11_12_13_15_19_20R1_21R1_25_37R36_120R36	7	2	5	1R1-7-8|2R1-3R1-5-6-9-10R1-11-15-19|4R1-12-13|20R1|21R1|25|37R36-120R36	475700000	410600000	65100000	345500000	18
134	134T6	'11/3917	'982000123128645	Matched	Clade_B	Clade_B-8	DFT1_2	DFT1_2	14114C>T	Bronte Park	-42.124875000000003	146.46679	2011	14/10/2011	DFT1	Tissue	No	Yes	No (metastasis with matched primary)	Lung		Metastasis		Multiple		0.82899999999999996	0.81899999999999995	0.86399999999999999	0.82399999999999995	Yes	Yes	M	3	Strain 2			29	15	14	1R1_2R1_2R1BM37_3R1_3R1BM37_4R1_5_6_7_8_9_9BM37_10R1_10R1BM37_11_12_13_15_15BM37_19_20R1_21R1_25_34R37_35R37_36R37_37R37_38R37_39R37	8	2	6	1R1-7-8|2R1-3R1-5-6-9-10R1-11-15-19|2R1BM37-3R1BM37-9BM37-10R1BM37-15BM37|4R1-12-13|20R1|21R1|25|34R37-35R37-36R37-37R37-38R37-39R37	457400000	239800000	217600000	22200000	13
134	134T7	'11/3917	'982000123128645	Matched	Clade_B	Clade_B-8	DFT1_2	DFT1_2	14114C>T	Bronte Park	-42.124875000000003	146.46679	2011	14/10/2011	DFT1	Tissue	No	Yes	No (metastasis with matched primary)	Muscle	Left front leg	Metastasis		Multiple		0.77	0.751	0.59	0.76049999999999995	Yes	Yes	M	3	Strain 2			18	9	9	1R1_2R1_3R1_4R1_5_6_7_8_9_10R1_11_12_13_15_19_20R1_21R1_25	6	1	5	1R1-7-8|2R1-3R1-5-6-9-10R1-11-15-19|4R1-12-13|20R1|21R1|25	225000000	159900000	65100000	94800000	18
135	135T1	'11/3918	'982000123216973	Matched	Clade_B	Clade_B-8	DFT1_2	DFT1_2	14114C>T	Bronte Park	-42.124875000000003	146.46679	2011	14/10/2011	DFT1	Tissue	No	Yes	Yes	Facial/oral	Upper left lip			Multiple		0.88300000000000001	0.878	0.91600000000000004	0.88049999999999995	No	Yes	F	1	Strain 2 evolved			18	9	9	1R1_2R1_3R1_4R1_5_6_7_8_9_10R1_11_12_13_15_19_20R1_21R1_25	6	1	5	1R1-7-8|2R1-3R1-5-6-9-10R1-11-15-19|4R1-12-13|20R1|21R1|25	225000000	159900000	65100000	94800000	18
135	135T2a	'11/3918	'982000123216973	Matched	Clade_B	Clade_B-8	DFT1_2	DFT1_2	14114C>T	Bronte Park	-42.124875000000003	146.46679	2011	14/10/2011	DFT1	Tissue	No	Yes	Yes	Facial/oral	Lower left lip			Multiple		0.88700000000000001	0.872	0.90500000000000003	0.87949999999999995	Yes	Yes	F	1	Strain 2 evolved			18	9	9	1R1_2R1_3R1_4R1_5_6_7_8_9_10R1_11_12_13_15_19_20R1_21R1_25	6	1	5	1R1-7-8|2R1-3R1-5-6-9-10R1-11-15-19|4R1-12-13|20R1|21R1|25	225000000	159900000	65100000	94800000	18
135	135T3a	'11/3918	'982000123216973	Matched	Clade_B	Clade_B-8	DFT1_2	DFT1_2D	14114C>T;14525C>T	Bronte Park	-42.124875000000003	146.46679	2011	14/10/2011	DFT1	Tissue	No	Yes	Yes	Facial/oral	Right lip			Multiple		0.94399999999999995	0.93100000000000005	0.871	0.9375	Yes	Yes	F	1	Strain 2 evolved			18	9	9	1R1_2R1_3R1_4R1_5_6_7_8_9_10R1_11_12_13_15_19_20R1_21R1_25	6	1	5	1R1-7-8|2R1-3R1-5-6-9-10R1-11-15-19|4R1-12-13|20R1|21R1|25	225000000	159900000	65100000	94800000	18
135	135T4a	'11/3918	'982000123216973	Matched	Clade_B	Clade_B-8	DFT1_2	DFT1_2	14114C>T	Bronte Park	-42.124875000000003	146.46679	2011	14/10/2011	DFT1	Tissue	No	No (duplicate)	No (duplicate)	Facial/oral	Lower left lip			Multiple	Duplicate DNA extraction from same tumour	0.64600000000000002	0.628	0.80600000000000005	0.63700000000000001	Yes	Yes	F	1	Strain 2 evolved			18	9	9	1R1_2R1_3R1_4R1_5_6_7_8_9_10R1_11_12_13_15_19_20R1_21R1_25	6	1	5	1R1-7-8|2R1-3R1-5-6-9-10R1-11-15-19|4R1-12-13|20R1|21R1|25	225000000	159900000	65100000	94800000	18
135	135T5a	'11/3918	'982000123216973	Matched	Clade_B	Clade_B-8	DFT1_2	DFT1_2	14114C>T	Bronte Park	-42.124875000000003	146.46679	2011	14/10/2011	DFT1	Tissue	No	No (duplicate)	No (duplicate)	Facial/oral	Lower left lip			Multiple	Duplicate DNA extraction from same tumour	0.83199999999999996	0.79600000000000004	0.83699999999999997	0.81399999999999995	Yes	Yes	F	1	Strain 2 evolved			18	9	9	1R1_2R1_3R1_4R1_5_6_7_8_9_10R1_11_12_13_15_19_20R1_21R1_25	6	1	5	1R1-7-8|2R1-3R1-5-6-9-10R1-11-15-19|4R1-12-13|20R1|21R1|25	225000000	159900000	65100000	94800000	18
135	135T6a	'11/3918	'982000123216973	Matched	Clade_B	Clade_B-8	DFT1_2	DFT1_2	14114C>T	Bronte Park	-42.124875000000003	146.46679	2011	14/10/2011	DFT1	Tissue	No	No (duplicate)	No (duplicate)	Facial/oral	Lower left lip			Multiple	Duplicate DNA extraction from same tumour	0.76600000000000001	0.73899999999999999	0.81200000000000006	0.75249999999999995	Yes	Yes	F	1	Strain 2 evolved			18	9	9	1R1_2R1_3R1_4R1_5_6_7_8_9_10R1_11_12_13_15_19_20R1_21R1_25	6	1	5	1R1-7-8|2R1-3R1-5-6-9-10R1-11-15-19|4R1-12-13|20R1|21R1|25	225000000	159900000	65100000	94800000	18
135	135T7a	'11/3918	'982000123216973	Matched	Clade_B	Clade_B-8	DFT1_2	DFT1_2	14114C>T	Bronte Park	-42.124875000000003	146.46679	2011	14/10/2011	DFT1	Tissue	No	No (duplicate)	No (duplicate)	Facial/oral	Lower left lip			Multiple	Duplicate DNA extraction from same tumour	0.74299999999999999	0.74299999999999999	0.84099999999999997	0.74299999999999999	Yes	Yes	F	1	Strain 2 evolved			18	9	9	1R1_2R1_3R1_4R1_5_6_7_8_9_10R1_11_12_13_15_19_20R1_21R1_25	6	1	5	1R1-7-8|2R1-3R1-5-6-9-10R1-11-15-19|4R1-12-13|20R1|21R1|25	225000000	159900000	65100000	94800000	18
136	136T	Unknown	'982000123131478	Unmatched	Clade_A1	Clade_A1-3A1	DFT1_3	DFT1_3A1	1828A>G;3255G>A;14130G>A	Kingston	-42.961210999999999	147.29703900000001	2012	01/01/2012	DFT1	Tissue	No	Yes	Yes	Unknown				Singleton		0.39200000000000002	Not Available	0.67200000000000004	0.39200000000000002	No	Yes	F	Unknown	No data (confirmed)			17	9	8	1R1_2R1_3R1_4R1_5_6_7_8_9_10R1_11_12_13_15_19_23_24	4	1	3	1R1-7-8|2R1-3R1-5-6-9-10R1-11-15-19|4R1-12-13|23-24	276200000	159900000	116300000	43600000	17
139	139T	'11/2091	'982009104751722	Matched	Clade_C	Clade_C-3	DFT1_5	DFT1_5	2681C>T	Waratah	-41.447800999999998	145.52639500000001	2011	27/05/2011	DFT1	Tissue	No	Yes	Yes	Facial/oral	Front lower lip			Multiple		0.76300000000000001	Not Available	0.77700000000000002	0.76300000000000001	No	Yes	F	4	Strain 2			15	9	6	1R1_2R1_3R1_4R1_5_6_7_8_9_10R1_11_12_13_15_19	3	1	2	1R1-7-8|2R1-3R1-5-6-9-10R1-11-15-19|4R1-12-13	211000000	159900000	51100000	108800000	15
139	139T1a	'11/2824	'982009104751722	Matched	Clade_C	Clade_C-3	DFT1_5	DFT1_5D	2681C>T;12646G>A	Waratah	-41.447800999999998	145.52639500000001	2011	21/07/2011	DFT1	Tissue	No	Yes	No (time-course sample)	Unknown				Multiple	Time-course	0.61299999999999999	0.59	0.51600000000000001	0.60150000000000003	Yes	Yes	F	4	Strain 2			15	9	6	1R1_2R1_3R1_4R1_5_6_7_8_9_10R1_11_12_13_15_19	3	1	2	1R1-7-8|2R1-3R1-5-6-9-10R1-11-15-19|4R1-12-13	211000000	159900000	51100000	108800000	15
140	140T	'13/0345	'982009106610951	Matched	Clade_C	Clade_C-3	DFT1_5	DFT1_5	2681C>T	Cradle Mountain (captive)	-41.590770999999997	145.966598	2013	30/01/2013	DFT1	Tissue	No	Yes	No (involved captive devil)	Facial/oral	Right side of face			Singleton		0.82899999999999996	0.86	0.85499999999999998	0.84450000000000003	Yes	Yes	M	2	Strain 2, strain 3 evolved			16	9	7	1R1_2R1_3R1_4R1_5_6_7_8_9_10R1_11_12_13_15_19_235	4	1	3	1R1-7-8|2R1-3R1-5-6-9-10R1-11-15-19|4R1-12-13|235	213200000	159900000	53300000	106600000	16
141	141T	'13/1520	'985154000001169	Matched	Clade_C	Clade_C-3	DFT1_5	DFT1_5	2681C>T	Cradle Mountain (captive)	-41.590770999999997	145.966598	2013	29/04/2013	DFT1	Tissue	No	Yes	No (involved captive devil)	Facial/oral	Exterior upper right lip			Singleton		0.67900000000000005	Not Available	0.8	0.67900000000000005	No	Yes	F	3	Strain 3 evolved			16	9	7	1R1_2R1_3R1_4R1_5_6_7_8_9_10R1_11_12_13_15_19_235	4	1	3	1R1-7-8|2R1-3R1-5-6-9-10R1-11-15-19|4R1-12-13|235	213200000	159900000	53300000	106600000	16
142	142T	'13/2898	'982009106583665	Matched	Clade_C	Clade_C-3	DFT1_5	DFT1_5	2681C>T	Cradle Mountain (captive)	-41.590770999999997	145.966598	2013	26/08/2013	DFT1	Tissue	No	Yes	No (involved captive devil)	Facial/oral	Left side of face near corner of mouth			Singleton		0.621	0.65200000000000002	0.75	0.63649999999999995	Yes	Yes	M	2	No data			16	9	7	1R1_2R1_3R1_4R1_5_6_7_8_9_10R1_11_12_13_15_19_235	4	1	3	1R1-7-8|2R1-3R1-5-6-9-10R1-11-15-19|4R1-12-13|235	213200000	159900000	53300000	106600000	16
143	143T	'11/2687	'982009105111670	Matched	Clade_C	Clade_C-3	DFT1_5	DFT1_5	2681C>T	West Pencil Pine	-41.717464999999997	145.85587000000001	2011	01/08/2011	DFT1	Tissue	No	Yes	Yes	Facial/oral	Right hand side lower jaw			Singleton		0.69599999999999995	0.68899999999999995	0.79500000000000004	0.6925	Yes	Yes	F	5	Strain 1			16	9	7	1R1_2R1_3R1_4R1_5_6_7_8_9_10R1_11_12_13_15_19_348	4	1	3	1R1-7-8|2R1-3R1-5-6-9-10R1-11-15-19|4R1-12-13|348	214000000	159900000	54100000	105800000	16
144	144T	'12/3848	'982009104904089	Matched	Clade_A2	Clade_A2-11	DFT1_0	DFT1_0	Novariants	West Pencil Pine	-41.717464999999997	145.85587000000001	2012	01/08/2012	DFT1	Tissue	No	Yes	Yes	Facial/oral	Lower right jaw			Singleton		0.85	0.86899999999999999	Not Available	0.85950000000000004	Yes	Yes	F	3	Strain 1	M5 loss		33	19	14	1R1_2R1_3R1_4R1_5_5G1CN4_5G1CN5_6_6BM17_7_8_9_10R1_11_11BM17_12_13_15_16R17_17R17_18R17_19_22_26_27R1_28R1_28R1G1CN4_29_29G1CN4_31_32_1834_1834G1CN4	9	4	5	1R1-7-8|2R1-3R1-5-6-9-10R1-11-15-19|4R1-12-13|5G1CN4-28R1-29-31-32-1834|5G1CN5|6BM17-11BM17-16R17-17R17-18R17|22|26-27R1|28R1G1CN4-29G1CN4-1834G1CN4	261107000	170700000	90407000	80293000	33
145	145T	'11/4371	'982009104881692	Matched	Clade_C	Clade_C-3	DFT1_5	DFT1_5	2681C>T	West Pencil Pine	-41.717464999999997	145.85587000000001	2011	01/08/2011	DFT1	Tissue	No	Yes (italicised)	Yes	Unknown				Singleton		0.13500000000000001	0.13100000000000001	0.433	0.13300000000000001	Yes	No	F	3	Strain 2	No data
146	146T	'12/2043	'982009106179620	Matched	Clade_C	Clade_C-2	DFT1_34	DFT1_34	2955A>G	West Pencil Pine	-41.717464999999997	145.85587000000001	2012	01/05/2012	DFT1	Tissue	No	Yes	Yes	Unknown				Singleton		0.81599999999999995	0.82	0.23200000000000001	0.81799999999999995	Yes	Yes	F	2	Strain 1	M5 loss		29	15	14	1R1_2R1_3R1_4R1_5_6_6BM30_7_8_9_10R1_11_11BM30_12_13_15_16R30_17R30_18R30_19_54R2_67R1_73R2_101R1_129R1_130_130G1CN4_816_1032R1	7	3	4	1R1-7-8|2R1-3R1-5-6-9-10R1-11-15-19|4R1-12-13|6BM30-11BM30-16R30-17R30-18R30|54R2-73R2-101R1-129R1-130|67R1-816-1032R1|130G1CN4	269148000	179000000	90148000	88852000	29
147	147T	Unknown	'982009104240273	Matched	Clade_B	Clade_B-10	DFT1_2	DFT1_2	14114C>T	West Pencil Pine	-41.717464999999997	145.85587000000001	2012	01/08/2012	DFT1	Tissue	No	Yes	Yes	Facial/oral	Right hand side of mouth			Singleton		0.80300000000000005	0.82099999999999995	0.81200000000000006	0.81200000000000006	Yes	Yes	F	5	Strain 2			18	9	9	1R1_2R1_3R1_4R1_5_6_7_8_9_10R1_11_12_13_15_19_20R1_21R1_25	6	1	5	1R1-7-8|2R1-3R1-5-6-9-10R1-11-15-19|4R1-12-13|20R1|21R1|25	225000000	159900000	65100000	94800000	18
148	148T	Unknown	'982009106089731	Matched	Clade_C	Clade_C-2	DFT1_0	DFT1_0	Novariants	West Pencil Pine	-41.717464999999997	145.85587000000001	2012	01/05/2012	DFT1	Tissue	No	Yes	Yes	Facial/oral	Left hand side of face			Singleton		0.35199999999999998	0.36199999999999999	0.63600000000000001	0.35699999999999998	Yes	Yes	F	2	Strain 1	M5 loss		33	15	18	1R1_2R1_3R1_4R1_5_6_6BM30_7_8_9_10R1_11_11BM30_12_13_15_16R30_17R30_18R30_19_21R5_51R2_54R2_67R1_73R2_101R1_129R1_130_586_816_1032R1_1041_1835	8	3	5	1R1-7-8|2R1-3R1-5-6-9-10R1-11-15-19|4R1-12-13|6BM30-11BM30-16R30-17R30-18R30|21R5-51R2-586-1041|54R2-73R2-101R1-129R1-130|67R1-816-1032R1|1835	331248000	212100000	119148000	92952000	33
149	149T	'13/0381	'982009105953323	Matched	Clade_C	Clade_C-2	DFT1_0	DFT1_0	Novariants	West Pencil Pine	-41.717464999999997	145.85587000000001	2012	01/11/2012	DFT1	Tissue	No	Yes	Yes	Facial/oral	Lower left lip			Singleton		0.39700000000000002	0.40500000000000003	0.57799999999999996	0.40100000000000002	Yes	Yes	F	1	Strain 1 tetraploid	M5 loss		29	15	14	1R1_2R1_3R1_4R1_5_6_6BM30_7_8_9_10R1_11_11BM30_12_13_15_16R30_17R30_18R30_19_54R2_67R1_73R2_101R1_129R1_130_340R1_816_1032R1	7	3	4	1R1-7-8|2R1-3R1-5-6-9-10R1-11-15-19|4R1-12-13|6BM30-11BM30-16R30-17R30-18R30|54R2-73R2-101R1-129R1-130|67R1-816-1032R1|340R1	265448000	175300000	90148000	85152000	29
152	152T	Unknown	'982009106093221	Matched	Clade_B	Clade_B-10	DFT1_2	DFT1_2	14114C>T	West Pencil Pine	-41.717464999999997	145.85587000000001	2012	28/02/2012	DFT1	Tissue	No	Yes	Yes	Unknown				Singleton		0.51900000000000002	0.51800000000000002	0.69099999999999995	0.51849999999999996	Yes	Yes	M	3	Strain 2			20	9	11	1R1_2R1_3R1_4R1_5_6_7_8_9_10R1_11_12_13_15_19_20R1_21R1_25_230_231	7	1	6	1R1-7-8|2R1-3R1-5-6-9-10R1-11-15-19|4R1-12-13|20R1|21R1|25|230-231	234100000	159900000	74200000	85700000	20
153	153T	Unknown	'982009104902095	Matched	Clade_A2	Clade_A2-11	DFT1_18	DFT1_18	10620T>A	West Pencil Pine	-41.717464999999997	145.85587000000001	2012	28/02/2012	DFT1	Tissue	No	Yes	Yes	Facial/oral	Right side of face			Singleton		0.29799999999999999	0.318	0.60199999999999998	0.308	Yes	Yes	M	2	Strain 1 (50% tetraploid), strain 2 evolved	M5 loss		33	19	14	1R1_2R1_3R1_4R1_5_5G1CN4_5G1CN5_6_6BM17_7_8_9_10R1_11_11BM17_12_13_15_16R17_17R17_18R17_19_22_26_27R1_28R1_28R1G1CN4_29_29G1CN4_31_32_1834_1834G1CN4	9	4	5	1R1-7-8|2R1-3R1-5-6-9-10R1-11-15-19|4R1-12-13|5G1CN4-28R1-29-31-32-1834|5G1CN5|6BM17-11BM17-16R17-17R17-18R17|22|26-27R1|28R1G1CN4-29G1CN4-1834G1CN4	261107000	170700000	90407000	80293000	33
154	154T	Unknown	'982009106212306	Matched	Clade_A2	Clade_A2-11	DFT1_0	DFT1_0	Novariants	West Pencil Pine	-41.717464999999997	145.85587000000001	2012	01/02/2012	DFT1	Tissue	No	Yes	Yes	Facial/oral				Multiple		0.47899999999999998	Not Available	0.79	0.47899999999999998	No	Yes	M	2	Strain 1, strain 2	M5 loss		33	19	14	1R1_2R1_3R1_4R1_5_5G1CN4_5G1CN5_6_6BM17_7_8_9_10R1_11_11BM17_12_13_15_16R17_17R17_18R17_19_22_26_27R1_28R1_28R1G1CN4_29_29G1CN4_31_32_1834_1834G1CN4	9	4	5	1R1-7-8|2R1-3R1-5-6-9-10R1-11-15-19|4R1-12-13|5G1CN4-28R1-29-31-32-1834|5G1CN5|6BM17-11BM17-16R17-17R17-18R17|22|26-27R1|28R1G1CN4-29G1CN4-1834G1CN4	261107000	170700000	90407000	80293000	33
154	154T1.1	Unknown	'982009106212306	Matched	Clade_A2	Clade_A2-11	DFT1_0	DFT1_0	Novariants	West Pencil Pine	-41.717464999999997	145.85587000000001	2012	01/11/2012	DFT1	Tissue	No	Yes	No (time-course sample)	Facial/oral				Multiple	Time-course	0.84199999999999997	0.85499999999999998	Not Available	0.84850000000000003	Yes	Yes	M	2	Strain 1, strain 2	M5 loss		33	19	14	1R1_2R1_3R1_4R1_5_5G1CN4_5G1CN5_6_6BM17_7_8_9_10R1_11_11BM17_12_13_15_16R17_17R17_18R17_19_22_26_27R1_28R1_28R1G1CN4_29_29G1CN4_31_32_1834_1834G1CN4	9	4	5	1R1-7-8|2R1-3R1-5-6-9-10R1-11-15-19|4R1-12-13|5G1CN4-28R1-29-31-32-1834|5G1CN5|6BM17-11BM17-16R17-17R17-18R17|22|26-27R1|28R1G1CN4-29G1CN4-1834G1CN4	261107000	170700000	90407000	80293000	33
154	154T2	Unknown	'982009106212306	Matched	Clade_A2	Clade_A2-11	DFT1_0	DFT1_0	Novariants	West Pencil Pine	-41.717464999999997	145.85587000000001	2012	01/02/2012	DFT1	Tissue	No	Yes	Yes	Facial/oral				Multiple		0.54400000000000004	0.55000000000000004	Not Available	0.54700000000000004	Yes	Yes	M	2	Strain 1, strain 2	M5 loss		33	19	14	1R1_2R1_3R1_4R1_5_5G1CN4_5G1CN5_6_6BM17_7_8_9_10R1_11_11BM17_12_13_15_16R17_17R17_18R17_19_22_26_27R1_28R1_28R1G1CN4_29_29G1CN4_31_32_1834_1834G1CN4	9	4	5	1R1-7-8|2R1-3R1-5-6-9-10R1-11-15-19|4R1-12-13|5G1CN4-28R1-29-31-32-1834|5G1CN5|6BM17-11BM17-16R17-17R17-18R17|22|26-27R1|28R1G1CN4-29G1CN4-1834G1CN4	261107000	170700000	90407000	80293000	33
155	155T	'09/0646	'982009104991370	Matched	Clade_A2	Clade_A2-10	DFT1_0	DFT1_0	Novariants	West Pencil Pine	-41.717464999999997	145.85587000000001	2011	01/05/2011	DFT1	Tissue	No	Yes	Yes	Unknown				Singleton		0.36499999999999999	0.40400000000000003	0.71199999999999997	0.38450000000000001	Yes	Yes	F	5	No data (confirmed)	M5 loss		33	18	15	1R1_2R1_3R1_4R1_5_6_6BM17_7_8_9_10R1_10R1G1CN4_10R1G1CN5_11_11BM17_12_13_15_15G1CN4_15G1CN5_16R17_17R17_18R17_19_22_26_27R1_93G1CN4_93G1CN5_93G1CN6_102G1CN4_102G1CN5_1827	10	4	6	1R1-7-8|2R1-3R1-5-6-9-10R1-11-15-19|4R1-12-13|6BM17-11BM17-16R17-17R17-18R17|10R1G1CN4-15G1CN4-93G1CN4-93G1CN5-102G1CN4|10R1G1CN5-15G1CN5-102G1CN5|22|26-27R1|93G1CN6|1827	265807000	173200000	92607000	80593000	33
156	156T	'11/2716	'982009104898077	Matched	Clade_A2	Clade_A2-11	DFT1_0	DFT1_0	Novariants	West Pencil Pine	-41.717464999999997	145.85587000000001	2011	01/02/2011	DFT1	Tissue	No	Yes	Yes	Unknown				Singleton		0.51100000000000001	0.59	0.76700000000000002	0.55049999999999999	Yes	Yes	M	2	Strain 1, strain 1 tetraploid	M5 loss		33	19	14	1R1_2R1_3R1_4R1_5_5G1CN4_5G1CN5_6_6BM17_7_8_9_10R1_11_11BM17_12_13_15_16R17_17R17_18R17_19_22_26_27R1_28R1_28R1G1CN4_29_29G1CN4_31_32_1834_1834G1CN4	9	4	5	1R1-7-8|2R1-3R1-5-6-9-10R1-11-15-19|4R1-12-13|5G1CN4-28R1-29-31-32-1834|5G1CN5|6BM17-11BM17-16R17-17R17-18R17|22|26-27R1|28R1G1CN4-29G1CN4-1834G1CN4	261107000	170700000	90407000	80293000	33
157	157T	'11/4406	'982009104982057	Matched	Clade_A2	Clade_A2-11	DFT1_0	DFT1_0	Novariants	West Pencil Pine	-41.717464999999997	145.85587000000001	2011	01/08/2011	DFT1	Tissue	No	Yes	Yes	Unknown				Singleton		0.22700000000000001	Not Available	Not Available	0.22700000000000001	Yes	Yes	F	4	No data (confirmed)	M5 loss		33	19	14	1R1_2R1_3R1_4R1_5_5G1CN4_5G1CN5_6_6BM17_7_8_9_10R1_11_11BM17_12_13_15_16R17_17R17_18R17_19_22_26_27R1_28R1_28R1G1CN4_29_29G1CN4_31_32_1834_1834G1CN4	9	4	5	1R1-7-8|2R1-3R1-5-6-9-10R1-11-15-19|4R1-12-13|5G1CN4-28R1-29-31-32-1834|5G1CN5|6BM17-11BM17-16R17-17R17-18R17|22|26-27R1|28R1G1CN4-29G1CN4-1834G1CN4	261107000	170700000	90407000	80293000	33
158	158T	'11/4370	'982009105137877	Matched	Clade_A2	Clade_A2-11	DFT1_0	DFT1_0	Novariants	West Pencil Pine	-41.717464999999997	145.85587000000001	2011	01/08/2011	DFT1	Tissue	No	Yes	Yes	Unknown				Singleton		0.79800000000000004	0.82699999999999996	Not Available	0.8125	Yes	Yes	F	5	Strain 1	M5 loss		33	19	14	1R1_2R1_3R1_4R1_5_5G1CN4_5G1CN5_6_6BM17_7_8_9_10R1_11_11BM17_12_13_15_16R17_17R17_18R17_19_22_26_27R1_28R1_28R1G1CN4_29_29G1CN4_31_32_1834_1834G1CN4	9	4	5	1R1-7-8|2R1-3R1-5-6-9-10R1-11-15-19|4R1-12-13|5G1CN4-28R1-29-31-32-1834|5G1CN5|6BM17-11BM17-16R17-17R17-18R17|22|26-27R1|28R1G1CN4-29G1CN4-1834G1CN4	261107000	170700000	90407000	80293000	33
159	159T	Unknown	'982009106032309	Matched	Clade_A2	Clade_A2-11	DFT1_0	DFT1_0	Novariants	West Pencil Pine	-41.717464999999997	145.85587000000001	2012	01/02/2012	DFT1	Tissue	No	Yes	Yes	Facial/oral				Singleton		0.46200000000000002	0.51500000000000001	0.72	0.48849999999999999	Yes	Yes	F	3	Strain 1	M5 loss		33	19	14	1R1_2R1_3R1_4R1_5_5G1CN4_5G1CN5_6_6BM17_7_8_9_10R1_11_11BM17_12_13_15_16R17_17R17_18R17_19_22_26_27R1_28R1_28R1G1CN4_29_29G1CN4_31_32_1834_1834G1CN4	9	4	5	1R1-7-8|2R1-3R1-5-6-9-10R1-11-15-19|4R1-12-13|5G1CN4-28R1-29-31-32-1834|5G1CN5|6BM17-11BM17-16R17-17R17-18R17|22|26-27R1|28R1G1CN4-29G1CN4-1834G1CN4	261107000	170700000	90407000	80293000	33
160	160T	'12/0773	'982009105958355	Matched	Clade_B	Clade_B-10	DFT1_2	DFT1_2	14114C>T	West Pencil Pine	-41.717464999999997	145.85587000000001	2012	01/02/2012	DFT1	Tissue	No	Yes (italicised)	Yes	Unknown				Singleton		0.188	Not Available	0.434	0.188	No	No	F	3	Strain 2	No data
161	161T1	Unknown	'982009104841875	Matched	Clade_A2	Clade_A2-11	DFT1_0	DFT1_0	Novariants	West Pencil Pine	-41.717464999999997	145.85587000000001	2011	01/11/2011	DFT1	Tissue	No	Yes	Yes	Unknown				Multiple		0.23100000000000001	0.251	0.67600000000000005	0.24099999999999999	Yes	Yes	F	5	Strain 1	M5 loss		33	19	14	1R1_2R1_3R1_4R1_5_5G1CN4_5G1CN5_6_6BM17_7_8_9_10R1_11_11BM17_12_13_15_16R17_17R17_18R17_19_22_26_27R1_28R1_28R1G1CN4_29_29G1CN4_31_32_1834_1834G1CN4	9	4	5	1R1-7-8|2R1-3R1-5-6-9-10R1-11-15-19|4R1-12-13|5G1CN4-28R1-29-31-32-1834|5G1CN5|6BM17-11BM17-16R17-17R17-18R17|22|26-27R1|28R1G1CN4-29G1CN4-1834G1CN4	261107000	170700000	90407000	80293000	33
161	161T2	Unknown	'982009104841875	Matched	Clade_A2	Clade_A2-11	DFT1_0	DFT1_0	Novariants	West Pencil Pine	-41.717464999999997	145.85587000000001	2011	01/11/2011	DFT1	Tissue	No	Yes	Yes	Unknown				Multiple		0.84899999999999998	0.87	Not Available	0.85950000000000004	Yes	Yes	F	5	Strain 1	M5 loss		33	19	14	1R1_2R1_3R1_4R1_5_5G1CN4_5G1CN5_6_6BM17_7_8_9_10R1_11_11BM17_12_13_15_16R17_17R17_18R17_19_22_26_27R1_28R1_28R1G1CN4_29_29G1CN4_31_32_1834_1834G1CN4	9	4	5	1R1-7-8|2R1-3R1-5-6-9-10R1-11-15-19|4R1-12-13|5G1CN4-28R1-29-31-32-1834|5G1CN5|6BM17-11BM17-16R17-17R17-18R17|22|26-27R1|28R1G1CN4-29G1CN4-1834G1CN4	261107000	170700000	90407000	80293000	33
162	162T	'12/2045	'982009104236435	Matched	Clade_B	Clade_B-10	DFT1_2	DFT1_2	14114C>T	West Pencil Pine	-41.717464999999997	145.85587000000001	2012	01/05/2012	DFT1	Tissue	No	Yes (italicised)	Yes	Unknown				Singleton		0.56399999999999995	Not Available	0.68200000000000005	0.56399999999999995	No	Yes	F	3	Strain 2 tetraploid			18	9	9	1R1_2R1_3R1_4R1_5_6_7_8_9_10R1_11_12_13_15_19_20R1_21R1_25	6	1	5	1R1-7-8|2R1-3R1-5-6-9-10R1-11-15-19|4R1-12-13|20R1|21R1|25	225000000	159900000	65100000	94800000	18
163	163T	'12/0760	'982009105954423	Matched	Clade_A2	Clade_A2-11	DFT1_0	DFT1_0	Novariants	West Pencil Pine	-41.717464999999997	145.85587000000001	2012	01/02/2012	DFT1	Tissue	No	Yes	Yes	Unknown				Singleton		0.60599999999999998	Not Available	Not Available	0.60599999999999998	No	Yes	F	2	Strain 1	M5 loss		33	19	14	1R1_2R1_3R1_4R1_5_5G1CN4_5G1CN5_6_6BM17_7_8_9_10R1_11_11BM17_12_13_15_16R17_17R17_18R17_19_22_26_27R1_28R1_28R1G1CN4_29_29G1CN4_31_32_1834_1834G1CN4	9	4	5	1R1-7-8|2R1-3R1-5-6-9-10R1-11-15-19|4R1-12-13|5G1CN4-28R1-29-31-32-1834|5G1CN5|6BM17-11BM17-16R17-17R17-18R17|22|26-27R1|28R1G1CN4-29G1CN4-1834G1CN4	261107000	170700000	90407000	80293000	33
164	164T	Unknown	'982009106155334	Matched	Clade_B	Clade_B-10	DFT1_2	DFT1_2	14114C>T	West Pencil Pine	-41.717464999999997	145.85587000000001	2012	01/02/2012	DFT1	Tissue	No	Yes	Yes	Facial/oral	Lower front and right lip			Singleton		0.26100000000000001	Not Available	0.63	0.26100000000000001	Yes	Yes	M	2	Strain 2			18	9	9	1R1_2R1_3R1_4R1_5_6_7_8_9_10R1_11_12_13_15_19_20R1_21R1_25	6	1	5	1R1-7-8|2R1-3R1-5-6-9-10R1-11-15-19|4R1-12-13|20R1|21R1|25	225000000	159900000	65100000	94800000	18
165	165T	Unknown	'982009106209752	Matched	Clade_A2	Clade_A2-11	DFT1_0	DFT1_0	Novariants	West Pencil Pine	-41.717464999999997	145.85587000000001	2012	01/11/2012	DFT1	Tissue	No	Yes	Yes	Facial/oral				Multiple		0.54500000000000004	Not Available	Not Available	0.54500000000000004	Yes	Yes	M	2	Strain 1	M5 loss		33	19	14	1R1_2R1_3R1_4R1_5_5G1CN4_5G1CN5_6_6BM17_7_8_9_10R1_11_11BM17_12_13_15_16R17_17R17_18R17_19_22_26_27R1_28R1_28R1G1CN4_29_29G1CN4_31_32_1834_1834G1CN4	9	4	5	1R1-7-8|2R1-3R1-5-6-9-10R1-11-15-19|4R1-12-13|5G1CN4-28R1-29-31-32-1834|5G1CN5|6BM17-11BM17-16R17-17R17-18R17|22|26-27R1|28R1G1CN4-29G1CN4-1834G1CN4	261107000	170700000	90407000	80293000	33
165	165T3	Unknown	'982009106209752	Matched	Clade_A2	Clade_A2-11	DFT1_0	DFT1_0	Novariants	West Pencil Pine	-41.717464999999997	145.85587000000001	2012	01/11/2012	DFT1	Tissue	No	Yes	Yes	Facial/oral				Multiple		0.73899999999999999	0.747	Not Available	0.74299999999999999	Yes	Yes	M	2	Strain 1	M5 loss		33	19	14	1R1_2R1_3R1_4R1_5_5G1CN4_5G1CN5_6_6BM17_7_8_9_10R1_11_11BM17_12_13_15_16R17_17R17_18R17_19_22_26_27R1_28R1_28R1G1CN4_29_29G1CN4_31_32_1834_1834G1CN4	9	4	5	1R1-7-8|2R1-3R1-5-6-9-10R1-11-15-19|4R1-12-13|5G1CN4-28R1-29-31-32-1834|5G1CN5|6BM17-11BM17-16R17-17R17-18R17|22|26-27R1|28R1G1CN4-29G1CN4-1834G1CN4	261107000	170700000	90407000	80293000	33
165	165T4	Unknown	'982009106209752	Matched	Clade_C	Clade_C-3	DFT1_5	DFT1_5	2681C>T	West Pencil Pine	-41.717464999999997	145.85587000000001	2012	01/11/2012	DFT1	Tissue	No	Yes	Yes	Facial/oral				Multiple		0.377	0.46200000000000002	0.629	0.41949999999999998	No	Yes	M	2	Strain 1			16	9	7	1R1_2R1_3R1_4R1_5_6_7_8_9_10R1_11_12_13_15_19_1836	4	1	3	1R1-7-8|2R1-3R1-5-6-9-10R1-11-15-19|4R1-12-13|1836	212500000	159900000	52600000	107300000	16
166	166T	'11/4405	'982009106128168	Matched	Clade_A2	Clade_A2-11	DFT1_0	DFT1_0	Novariants	West Pencil Pine	-41.717464999999997	145.85587000000001	2011	01/11/2011	DFT1	Tissue	No	Yes	Yes	Unknown				Multiple		0.59499999999999997	Not Available	Not Available	0.59499999999999997	Yes	Yes	M	2	Strain 1 evolved	M5 loss		33	19	14	1R1_2R1_3R1_4R1_5_5G1CN4_5G1CN5_6_6BM17_7_8_9_10R1_11_11BM17_12_13_15_16R17_17R17_18R17_19_22_26_27R1_28R1_28R1G1CN4_29_29G1CN4_31_32_1834_1834G1CN4	9	4	5	1R1-7-8|2R1-3R1-5-6-9-10R1-11-15-19|4R1-12-13|5G1CN4-28R1-29-31-32-1834|5G1CN5|6BM17-11BM17-16R17-17R17-18R17|22|26-27R1|28R1G1CN4-29G1CN4-1834G1CN4	261107000	170700000	90407000	80293000	33
166	166T4	'11/4405	'982009106128168	Matched	Clade_A2	Clade_A2-11	DFT1_0	DFT1_0	Novariants	West Pencil Pine	-41.717464999999997	145.85587000000001	2011	01/11/2011	DFT1	Tissue	No	No (missing data)	Yes	Unknown				Multiple		0.08	Not Available	0.18	0.08	No	No	M	2	Strain 1 evolved	No data
167	167T	'09/2651	'982009104253781	Matched	Clade_C	Clade_C-3	DFT1_5	DFT1_5B1	2681C>T;2835G>C;5843A>G	West Pencil Pine	-41.717464999999997	145.85587000000001	2011	01/02/2011	DFT1	Tissue	No	Yes	Yes	Unknown				Multiple		0.80900000000000005	Not Available	0.92300000000000004	0.80900000000000005	No	Yes	M	3	Strain 1	M5 loss		20	9	11	1R1_2R1_3R1_4R1_5_6_6BM33_7_8_9_10R1_11_11BM33_12_13_15_16R33_17R33_18R33_19	4	1	3	1R1-7-8|2R1-3R1-5-6-9-10R1-11-15-19|4R1-12-13|6BM33-11BM33-16R33-17R33-18R33	219207000	159900000	59307000	100593000	20
167	167T1.1	'09/2651	'982009104253781	Matched	Clade_C	Clade_C-3	DFT1_5	DFT1_5B1	2681C>T;2835G>C;5843A>G	West Pencil Pine	-41.717464999999997	145.85587000000001	2011	01/11/2011	DFT1	Tissue	No	Yes	No (time-course sample)	Unknown				Multiple	Time-course	0.82699999999999996	0.871	0.89600000000000002	0.84899999999999998	Yes	Yes	M	3	Strain 1	M5 loss		20	9	11	1R1_2R1_3R1_4R1_5_6_6BM33_7_8_9_10R1_11_11BM33_12_13_15_16R33_17R33_18R33_19	4	1	3	1R1-7-8|2R1-3R1-5-6-9-10R1-11-15-19|4R1-12-13|6BM33-11BM33-16R33-17R33-18R33	219207000	159900000	59307000	100593000	20
167	167T2	'09/2651	'982009104253781	Matched	Clade_C	Clade_C-3	DFT1_5	DFT1_5	2681C>T	West Pencil Pine	-41.717464999999997	145.85587000000001	2011	01/11/2011	DFT1	Tissue	No	Yes	Yes	Unknown				Multiple		0.69699999999999995	0.69099999999999995	0.79700000000000004	0.69399999999999995	Yes	Yes	M	3	Strain 1	M5 loss		21	9	12	1R1_2R1_3R1_4R1_5_6_6BM33_7_8_9_10R1_11_11BM33_12_13_15_16R33_17R33_18R33_19_1032R3	5	1	4	1R1-7-8|2R1-3R1-5-6-9-10R1-11-15-19|4R1-12-13|6BM33-11BM33-16R33-17R33-18R33|1032R3	220707000	159900000	60807000	99093000	21
167	167T3	'09/2651	'982009104253781	Matched	Clade_C	Clade_C-3	DFT1_5	DFT1_5B1	2681C>T;2835G>C;5843A>G	West Pencil Pine	-41.717464999999997	145.85587000000001	2011	01/11/2011	DFT1	Tissue	No	Yes	Yes	Unknown				Multiple		0.65	0.61799999999999999	0.877	0.63400000000000001	Yes	Yes	M	3	Strain 1	M5 loss		20	9	11	1R1_2R1_3R1_4R1_5_6_6BM33_7_8_9_10R1_11_11BM33_12_13_15_16R33_17R33_18R33_19	4	1	3	1R1-7-8|2R1-3R1-5-6-9-10R1-11-15-19|4R1-12-13|6BM33-11BM33-16R33-17R33-18R33	219207000	159900000	59307000	100593000	20
168	168T	Unknown	'982009106205647	Unmatched	Clade_A2	Clade_A2-11	DFT1_0	DFT1_0	Novariants	West Pencil Pine	-41.717464999999997	145.85587000000001	2012	01/08/2012	DFT1	Tissue	No	Yes	Yes	Unknown				Singleton		0.85899999999999999	Not Available	Not Available	0.85899999999999999	Yes	Yes	F	2	Strain 1	M5 loss		33	19	14	1R1_2R1_3R1_4R1_5_5G1CN4_5G1CN5_6_6BM17_7_8_9_10R1_11_11BM17_12_13_15_16R17_17R17_18R17_19_22_26_27R1_28R1_28R1G1CN4_29_29G1CN4_31_32_1834_1834G1CN4	9	4	5	1R1-7-8|2R1-3R1-5-6-9-10R1-11-15-19|4R1-12-13|5G1CN4-28R1-29-31-32-1834|5G1CN5|6BM17-11BM17-16R17-17R17-18R17|22|26-27R1|28R1G1CN4-29G1CN4-1834G1CN4	261107000	170700000	90407000	80293000	33
169	169T	'11/0575	'982009104236737	Matched	Clade_C	Clade_C-3	DFT1_5	DFT1_5	2681C>T	West Pencil Pine	-41.717464999999997	145.85587000000001	2011	01/02/2011	DFT1	Tissue	No	Yes	Yes	Unknown				Singleton		0.86899999999999999	Not Available	0.84799999999999998	0.86899999999999999	Yes	Yes	F	5	No data (confirmed)	M5 loss		20	9	11	1R1_2R1_3R1_4R1_5_6_6BM33_7_8_9_10R1_11_11BM33_12_13_15_16R33_17R33_18R33_19	4	1	3	1R1-7-8|2R1-3R1-5-6-9-10R1-11-15-19|4R1-12-13|6BM33-11BM33-16R33-17R33-18R33	219207000	159900000	59307000	100593000	20
170	170T	'11/4331	'982009104925282	Matched	Clade_C	Clade_C-3	DFT1_5	DFT1_5	2681C>T	West Pencil Pine	-41.717464999999997	145.85587000000001	2011	01/11/2011	DFT1	Tissue	No	Yes	Yes	Unknown				Singleton		0.60699999999999998	Not Available	0.73699999999999999	0.60699999999999998	Yes	Yes	F	2	Strain 1, strain 2			16	9	7	1R1_2R1_3R1_4R1_5_6_7_8_9_10R1_11_12_13_15_19_1032R3	4	1	3	1R1-7-8|2R1-3R1-5-6-9-10R1-11-15-19|4R1-12-13|1032R3	212500000	159900000	52600000	107300000	16
171	171T	'07/1535	'982009104818438	Matched	Clade_A2	Clade_A2-11	DFT1_0	DFT1_0	Novariants	West Pencil Pine	-41.717464999999997	145.85587000000001	2011	01/05/2011	DFT1	Tissue	No	Yes	Yes	Unknown				Singleton		0.45900000000000002	Not Available	0.28000000000000003	0.45900000000000002	Yes	Yes	F	6	No data (confirmed)	M5 loss		34	19	15	1R1_2R1_3R1_3R1BM27_4R1_5_5G1CN4_5G1CN5_6_6BM17_7_8_9_10R1_11_11BM17_12_13_15_16R17_17R17_18R17_19_22_26_27R1_28R1_28R1G1CN4_29_29G1CN4_31_32_1834_1834G1CN4	10	4	6	1R1-7-8|2R1-3R1-5-6-9-10R1-11-15-19|3R1BM27|4R1-12-13|5G1CN4-28R1-29-31-32-1834|5G1CN5|6BM17-11BM17-16R17-17R17-18R17|22|26-27R1|28R1G1CN4-29G1CN4-1834G1CN4	263107000	170700000	92407000	78293000	34
172	172T	'09/0605	'982009104267534	Matched	Clade_A2	Clade_A2-11	DFT1_0	DFT1_0	Novariants	West Pencil Pine	-41.717464999999997	145.85587000000001	2011	01/11/2011	DFT1	Tissue	No	Yes	Yes	Unknown				Singleton		0.64600000000000002	Not Available	0.79800000000000004	0.64600000000000002	Yes	Yes	M	4	Strain 1	M5 loss		33	19	14	1R1_2R1_3R1_4R1_5_5G1CN4_5G1CN5_6_6BM17_7_8_9_10R1_11_11BM17_12_13_15_16R17_17R17_18R17_19_22_26_27R1_28R1_28R1G1CN4_29_29G1CN4_31_32_1834_1834G1CN4	9	4	5	1R1-7-8|2R1-3R1-5-6-9-10R1-11-15-19|4R1-12-13|5G1CN4-28R1-29-31-32-1834|5G1CN5|6BM17-11BM17-16R17-17R17-18R17|22|26-27R1|28R1G1CN4-29G1CN4-1834G1CN4	261107000	170700000	90407000	80293000	33
173	173T	'11/2714	'982009104914526	Matched	Clade_A2	Clade_A2-11	DFT1_0	DFT1_0	Novariants	West Pencil Pine	-41.717464999999997	145.85587000000001	2011	01/07/2011	DFT1	Tissue	No	Yes	Yes	Unknown				Singleton		0.80100000000000005	Not Available	Not Available	0.80100000000000005	Yes	Yes	F	3	No data (confirmed)	M5 loss		33	19	14	1R1_2R1_3R1_4R1_5_5G1CN4_5G1CN5_6_6BM17_7_8_9_10R1_11_11BM17_12_13_15_16R17_17R17_18R17_19_22_26_27R1_28R1_28R1G1CN4_29_29G1CN4_31_32_1834_1834G1CN4	9	4	5	1R1-7-8|2R1-3R1-5-6-9-10R1-11-15-19|4R1-12-13|5G1CN4-28R1-29-31-32-1834|5G1CN5|6BM17-11BM17-16R17-17R17-18R17|22|26-27R1|28R1G1CN4-29G1CN4-1834G1CN4	261107000	170700000	90407000	80293000	33
174	174T1	Unknown	'982009106160463	Matched	Clade_C	Clade_C-3	DFT1_5	DFT1_5B1	2681C>T;2835G>C;5843A>G	West Pencil Pine	-41.717464999999997	145.85587000000001	2012	11/01/2012	DFT1	Tissue	No	Yes	Yes	Facial/oral	Exterior lower right lip			Multiple		0.126	0.113	0.39	0.1195	No	No	F	1	Strain 1	No data
174	174T2	Unknown	'982009106160463	Matched	Clade_C	Clade_C-3	DFT1_5	DFT1_5B1	2681C>T;2835G>C;5843A>G	West Pencil Pine	-41.717464999999997	145.85587000000001	2014	01/05/2014	DFT1	Tissue	No	Yes	No (time-course sample)	Facial/oral	Exterior lower right lip			Multiple	Time-course	0.90300000000000002	0.96199999999999997	0.86799999999999999	0.9325	Yes	Yes	F	1	Strain 1	M5 loss		20	9	11	1R1_2R1_3R1_4R1_5_6_6BM33_7_8_9_10R1_11_11BM33_12_13_15_16R33_17R33_18R33_19	4	1	3	1R1-7-8|2R1-3R1-5-6-9-10R1-11-15-19|4R1-12-13|6BM33-11BM33-16R33-17R33-18R33	219207000	159900000	59307000	100593000	20
175	175T1	'09/2693	'982009104249741	Matched	Clade_A2	Clade_A2-10	DFT1_0	DFT1_0	Novariants	West Pencil Pine	-41.717464999999997	145.85587000000001	2011	01/05/2011	DFT1	Tissue	No	Yes	Yes	Unknown				Singleton		0.30399999999999999	0.308	0.59799999999999998	0.30599999999999999	Yes	Yes	M	4	No data (confirmed)	M5 loss		30	15	15	1R1_2R1_3R1_4R1_5_6_6BM17_7_8_9_10R1_10R1G1CN4_11_11BM17_12_13_15_15G1CN4_16R17_17R17_18R17_19_22_26_27R1_93G1CN4_93G1CN5_93G1CN6_102G1CN4_158	9	3	6	1R1-7-8|2R1-3R1-5-6-9-10R1-11-15-19|4R1-12-13|6BM17-11BM17-16R17-17R17-18R17|10R1G1CN4-15G1CN4-93G1CN4-93G1CN5-102G1CN4|22|26-27R1|93G1CN6|158	264707000	170000000	94707000	75293000	30
176	176T1	'09/0606	'982009104240078	Matched	Clade_B	Clade_B-10	DFT1_2	DFT1_2	14114C>T	West Pencil Pine	-41.717464999999997	145.85587000000001	2011	01/11/2011	DFT1	Tissue	No	Yes	Yes	Unknown				Singleton		0.84699999999999998	0.82399999999999995	0.82799999999999996	0.83550000000000002	Yes	Yes	F	4	Strain 2			18	9	9	1R1_2R1_3R1_4R1_5_6_7_8_9_10R1_11_12_13_15_19_20R1_21R1_25	6	1	5	1R1-7-8|2R1-3R1-5-6-9-10R1-11-15-19|4R1-12-13|20R1|21R1|25	225000000	159900000	65100000	94800000	18
177	177T1	'09/2697	'982009104246911	Matched	Clade_A2	Clade_A2-11	DFT1_0	DFT1_0	Novariants	West Pencil Pine	-41.717464999999997	145.85587000000001	2011	01/02/2011	DFT1	Tissue	No	Yes	Yes	Unknown				Singleton		0.36899999999999999	0.36199999999999999	2.3E-2	0.36549999999999999	Yes	Yes	F	3	No data (confirmed)	M5 loss		32	18	14	1R1_2R1_3R1_4R1_5_5G1CN4_6_6BM17_7_8_9_10R1_11_11BM17_12_13_15_16R17_17R17_18R17_19_22_26_27R1_28R1_28R1G1CN4_29_29G1CN4_31_32_1834_1834G1CN4	8	3	5	1R1-7-8|2R1-3R1-5-6-9-10R1-11-15-19|4R1-12-13|5G1CN4-28R1-29-31-32-1834|6BM17-11BM17-16R17-17R17-18R17|22|26-27R1|28R1G1CN4-29G1CN4-1834G1CN4	260207000	169800000	90407000	79393000	32
178	178T1	'11/4402	'982009104871888	Matched	Clade_B	Clade_B-10	DFT1_2	DFT1_2	14114C>T	West Pencil Pine	-41.717464999999997	145.85587000000001	2011	01/11/2011	DFT1	Tissue	No	Yes	No (duplicate)	Unknown				Multiple		0.80300000000000005	0.77500000000000002	0.91	0.78900000000000003	Yes	Yes	M	5	Strain 2			20	9	11	1R1_2R1_3R1_4R1_5_6_7_8_9_10R1_11_12_13_15_19_20R1_21R1_25_230_231	7	1	6	1R1-7-8|2R1-3R1-5-6-9-10R1-11-15-19|4R1-12-13|20R1|21R1|25|230-231	234100000	159900000	74200000	85700000	20
178	178T2	'11/4402	'982009104871888	Matched	Clade_B	Clade_B-10	DFT1_2	DFT1_2	14114C>T	West Pencil Pine	-41.717464999999997	145.85587000000001	2011	01/11/2011	DFT1	Tissue	No	Yes	Yes	Unknown				Multiple		0.36899999999999999	0.37	0.64700000000000002	0.3695	Yes	Yes	M	5	Strain 2			20	9	11	1R1_2R1_3R1_4R1_5_6_7_8_9_10R1_11_12_13_15_19_20R1_21R1_25_230_231	7	1	6	1R1-7-8|2R1-3R1-5-6-9-10R1-11-15-19|4R1-12-13|20R1|21R1|25|230-231	234100000	159900000	74200000	85700000	20
178	178T3	'11/4402	'982009104871888	Matched	Clade_B	Clade_B-10	DFT1_2	DFT1_2	14114C>T	West Pencil Pine	-41.717464999999997	145.85587000000001	2011	01/11/2011	DFT1	Tissue	No	Yes	Yes	Unknown				Multiple		0.6	0.60899999999999999	0.82899999999999996	0.60450000000000004	Yes	Yes	M	5	Strain 2			19	10	9	1R1_2R1_3R1_4R1_5_6_7_8_9_10R1_11_12_13_15_19_20R1_21R1_25_128	7	2	5	1R1-7-8|2R1-3R1-5-6-9-10R1-11-15-19|4R1-12-13|20R1|21R1|25|128	226000000	160900000	65100000	95800000	19
179	179T1	'12/0775	'982009104252932	Matched (MIPs Only)	Clade_B	Clade_B-10	DFT1_2	DFT1_2	14114C>T	West Pencil Pine	-41.717464999999997	145.85587000000001	2012	01/02/2012	DFT1	Tissue	No	Yes	Yes	Unknown				Singleton		0.71399999999999997	0.66900000000000004	0.80400000000000005	0.6915	Yes	Yes	F	4	Strain 2			18	9	9	1R1_2R1_3R1_4R1_5_6_7_8_9_10R1_11_12_13_15_19_20R1_21R1_25	6	1	5	1R1-7-8|2R1-3R1-5-6-9-10R1-11-15-19|4R1-12-13|20R1|21R1|25	225000000	159900000	65100000	94800000	18
180	180T1	'11/2011	'982009104235981	Matched	Clade_A2	Clade_A2-11	DFT1_0	DFT1_0	Novariants	West Pencil Pine	-41.717464999999997	145.85587000000001	2011	01/02/2011	DFT1	Tissue	No	Yes	Yes	Unknown				Singleton		0.68	0.70099999999999996	0.79400000000000004	0.6905	Yes	Yes	M	2	No data (confirmed)	M5 loss		33	19	14	1R1_2R1_3R1_4R1_5_5G1CN4_5G1CN5_6_6BM17_7_8_9_10R1_11_11BM17_12_13_15_16R17_17R17_18R17_19_22_26_27R1_28R1_28R1G1CN4_29_29G1CN4_31_32_1834_1834G1CN4	9	4	5	1R1-7-8|2R1-3R1-5-6-9-10R1-11-15-19|4R1-12-13|5G1CN4-28R1-29-31-32-1834|5G1CN5|6BM17-11BM17-16R17-17R17-18R17|22|26-27R1|28R1G1CN4-29G1CN4-1834G1CN4	261107000	170700000	90407000	80293000	33
181	181T1	'11/2749	'982009104785985	Matched	Clade_C	Clade_C-3	DFT1_5	DFT1_5	2681C>T	West Pencil Pine	-41.717464999999997	145.85587000000001	2011	01/05/2011	DFT1	Tissue	No	Yes	Yes	Unknown				Singleton		0.71899999999999997	0.70299999999999996	0.76100000000000001	0.71099999999999997	Yes	Yes	M	5	No data (confirmed)	M5 loss		22	9	13	1R1_2R1_3R1_4R1_5_6_6BM33_7_8_9_10R1_11_11BM33_12_13_15_16R33_17R33_18R33_19_27R2_603	5	1	4	1R1-7-8|2R1-3R1-5-6-9-10R1-11-15-19|4R1-12-13|6BM33-11BM33-16R33-17R33-18R33|27R2-603	223307000	159900000	63407000	96493000	22
182	182T1	Unknown	'982009106164254	Matched	Clade_A2	Clade_A2-11	DFT1_0	DFT1_0	Novariants	West Pencil Pine	-41.717464999999997	145.85587000000001	2011	01/11/2011	DFT1	Tissue	No	Yes	Yes	Unknown				Singleton		0.80300000000000005	Not Available	Not Available	0.80300000000000005	No	Yes	M	1	Strain 1	M5 loss		33	19	14	1R1_2R1_3R1_4R1_5_5G1CN4_5G1CN5_6_6BM17_7_8_9_10R1_11_11BM17_12_13_15_16R17_17R17_18R17_19_22_26_27R1_28R1_28R1G1CN4_29_29G1CN4_31_32_1834_1834G1CN4	9	4	5	1R1-7-8|2R1-3R1-5-6-9-10R1-11-15-19|4R1-12-13|5G1CN4-28R1-29-31-32-1834|5G1CN5|6BM17-11BM17-16R17-17R17-18R17|22|26-27R1|28R1G1CN4-29G1CN4-1834G1CN4	261107000	170700000	90407000	80293000	33
187	187T1	'11/2715	'982009104809417	Matched	Clade_B	Clade_B-10	DFT1_2	DFT1_2	14114C>T	West Pencil Pine	-41.717464999999997	145.85587000000001	2011	01/08/2011	DFT1	Tissue	No	Yes (italicised)	Yes	Unknown				Singleton		0.65800000000000003	Not Available	0.82299999999999995	0.65800000000000003	No	Yes	M	5	Strain 2			18	9	9	1R1_2R1_3R1_4R1_5_6_7_8_9_10R1_11_12_13_15_19_20R1_21R1_25	6	1	5	1R1-7-8|2R1-3R1-5-6-9-10R1-11-15-19|4R1-12-13|20R1|21R1|25	225000000	159900000	65100000	94800000	18
188	188T1	'11/0608	'982009105154207	Matched	Clade_B	Clade_B-10	DFT1_2	DFT1_2	14114C>T	West Pencil Pine	-41.717464999999997	145.85587000000001	2011	01/02/2011	DFT1	Tissue	No	Yes (italicised)	Yes	Unknown				Singleton		0.89100000000000001	Not Available	0.95	0.89100000000000001	No	Yes	F	3	Strain 2			18	9	9	1R1_2R1_3R1_4R1_5_6_7_8_9_10R1_11_12_13_15_19_20R1_21R1_25	6	1	5	1R1-7-8|2R1-3R1-5-6-9-10R1-11-15-19|4R1-12-13|20R1|21R1|25	225000000	159900000	65100000	94800000	18
189	189T1	'11/4375	'982009106132103	Matched	Clade_A2	Clade_A2-11	DFT1_0	DFT1_0	Novariants	West Pencil Pine	-41.717464999999997	145.85587000000001	2011	01/08/2011	DFT1	Tissue	No	Yes	Yes	Unknown				Singleton		0.245	Not Available	0.436	0.245	No	Yes	F	1	Strain 1 (25% tetraploid)	M5 loss		33	19	14	1R1_2R1_3R1_4R1_5_5G1CN4_5G1CN5_6_6BM17_7_8_9_10R1_11_11BM17_12_13_15_16R17_17R17_18R17_19_22_26_27R1_28R1_28R1G1CN4_29_29G1CN4_31_32_1834_1834G1CN4	9	4	5	1R1-7-8|2R1-3R1-5-6-9-10R1-11-15-19|4R1-12-13|5G1CN4-28R1-29-31-32-1834|5G1CN5|6BM17-11BM17-16R17-17R17-18R17|22|26-27R1|28R1G1CN4-29G1CN4-1834G1CN4	261107000	170700000	90407000	80293000	33
190	190T1	'11/1981	'982009104979666	Matched	Clade_A2	Clade_A2-11	DFT1_0	DFT1_0	Novariants	West Pencil Pine	-41.717464999999997	145.85587000000001	2011	01/05/2011	DFT1	Tissue	No	Yes	Yes	Unknown				Multiple		0.57599999999999996	Not Available	Not Available	0.57599999999999996	No	Yes	M	3	No data (confirmed)	M5 loss		36	21	15	1R1_2R1_3R1_4R1_5_5G1CN4_5G1CN5_6_6BM17_7_8_9_10R1_11_11BM17_12_13_15_16R17_17R17_18R17_19_22_26_27R1_28R1_28R1G1CN4_29_29G1CN4_31_32_213_907_909_1834_1834G1CN4	12	6	6	1R1-7-8|2R1-3R1-5-6-9-10R1-11-15-19|4R1-12-13|5G1CN4-28R1-29-31-32-1834|5G1CN5|6BM17-11BM17-16R17-17R17-18R17|22|26-27R1|28R1G1CN4-29G1CN4-1834G1CN4|213|907|909	264107000	172600000	91507000	81093000	36
190	190T1a	'11/1981	'982009104979666	Matched	Clade_A2	Clade_A2-11	DFT1_0	DFT1_0	Novariants	West Pencil Pine	-41.717464999999997	145.85587000000001	2011	01/05/2011	DFT1	Tissue	No	Yes	Yes	Unknown				Multiple		0.318	0.313	0.73099999999999998	0.3155	Yes	Yes	M	3	No data (confirmed)	M5 loss		34	20	14	1R1_2R1_3R1_4R1_5_5G1CN4_6_6BM17_7_8_9_10R1_11_11BM17_12_13_15_16R17_17R17_18R17_19_22_26_27R1_28R1_28R1G1CN4_29_29G1CN4_31_32_213_213G1CN4_1834_1834G1CN4	10	5	5	1R1-7-8|2R1-3R1-5-6-9-10R1-11-15-19|4R1-12-13|5G1CN4-28R1-29-31-32-1834|6BM17-11BM17-16R17-17R17-18R17|22|26-27R1|28R1G1CN4-29G1CN4-1834G1CN4|213|213G1CN4	262207000	171800000	90407000	81393000	34
190	190T3	'11/1981	'982009104979666	Matched	Clade_A2	Clade_A2-11	DFT1_0	DFT1_0	Novariants	West Pencil Pine	-41.717464999999997	145.85587000000001	2011	01/05/2011	DFT1	Tissue	No	Yes	Yes	Unknown				Multiple		0.55900000000000005	0.5	Not Available	0.52949999999999997	No	Yes	M	3	No data (confirmed)	M5 loss		34	20	14	1R1_2R1_3R1_4R1_5_5G1CN4_5G1CN5_6_6BM17_7_8_9_10R1_11_11BM17_12_13_15_16R17_17R17_18R17_19_22_26_27R1_28R1_28R1G1CN4_29_29G1CN4_31_32_213_1834_1834G1CN4	10	5	5	1R1-7-8|2R1-3R1-5-6-9-10R1-11-15-19|4R1-12-13|5G1CN4-28R1-29-31-32-1834|5G1CN5|6BM17-11BM17-16R17-17R17-18R17|22|26-27R1|28R1G1CN4-29G1CN4-1834G1CN4|213	262107000	171700000	90407000	81293000	34
191	191T1	Unknown	'982000167809050	Matched	Clade_B	Clade_B-10	DFT1_2	DFT1_2	14114C>T	West Pencil Pine	-41.717464999999997	145.85587000000001	2014	01/05/2014	DFT1	Tissue	No	Yes	Yes	Unknown				Multiple		0.77200000000000002	0.79800000000000004	0.78800000000000003	0.78500000000000003	Yes	Yes	M	Unknown	No data (confirmed)			18	9	9	1R1_2R1_3R1_4R1_5_6_7_8_9_10R1_11_12_13_15_19_20R1_21R1_25	6	1	5	1R1-7-8|2R1-3R1-5-6-9-10R1-11-15-19|4R1-12-13|20R1|21R1|25	225000000	159900000	65100000	94800000	18
191	191T2	Unknown	'982000167809050	Matched	Clade_B	Clade_B-10	DFT1_2	DFT1_2	14114C>T	West Pencil Pine	-41.717464999999997	145.85587000000001	2014	01/05/2014	DFT1	Tissue	No	No (duplicate)	No (duplicate)	Unknown				Multiple	Duplicate DNA extraction from same tumour	0.89100000000000001	0.92400000000000004	0.83599999999999997	0.90749999999999997	Yes	Yes	M	Unknown	No data (confirmed)			18	9	9	1R1_2R1_3R1_4R1_5_6_7_8_9_10R1_11_12_13_15_19_20R1_21R1_25	6	1	5	1R1-7-8|2R1-3R1-5-6-9-10R1-11-15-19|4R1-12-13|20R1|21R1|25	225000000	159900000	65100000	94800000	18
192	192T1	Unknown	'982000167810552	Matched	Clade_A2	Clade_A2-11	DFT1_0	DFT1_0	Novariants	West Pencil Pine	-41.717464999999997	145.85587000000001	2014	01/05/2014	DFT1	Tissue	No	Yes	Yes	Unknown				Multiple		0.74199999999999999	0.76800000000000002	Not Available	0.755	Yes	Yes	M	Unknown	No data (confirmed)	M5 loss		33	19	14	1R1_2R1_3R1_4R1_5_5G1CN4_5G1CN5_6_6BM17_7_8_9_10R1_11_11BM17_12_13_15_16R17_17R17_18R17_19_22_26_27R1_28R1_28R1G1CN4_29_29G1CN4_31_32_1834_1834G1CN4	9	4	5	1R1-7-8|2R1-3R1-5-6-9-10R1-11-15-19|4R1-12-13|5G1CN4-28R1-29-31-32-1834|5G1CN5|6BM17-11BM17-16R17-17R17-18R17|22|26-27R1|28R1G1CN4-29G1CN4-1834G1CN4	261107000	170700000	90407000	80293000	33
192	192T2	Unknown	'982000167810552	Matched	Clade_A2	Clade_A2-11	DFT1_0	DFT1_0	Novariants	West Pencil Pine	-41.717464999999997	145.85587000000001	2014	01/05/2014	DFT1	Tissue	No	No (duplicate)	No (duplicate)	Unknown				Multiple	Duplicate DNA extraction from same tumour	0.71799999999999997	0.77400000000000002	Not Available	0.746	Yes	Yes	M	Unknown	No data (confirmed)	M5 loss		33	19	14	1R1_2R1_3R1_4R1_5_5G1CN4_5G1CN5_6_6BM17_7_8_9_10R1_11_11BM17_12_13_15_16R17_17R17_18R17_19_22_26_27R1_28R1_28R1G1CN4_29_29G1CN4_31_32_1834_1834G1CN4	9	4	5	1R1-7-8|2R1-3R1-5-6-9-10R1-11-15-19|4R1-12-13|5G1CN4-28R1-29-31-32-1834|5G1CN5|6BM17-11BM17-16R17-17R17-18R17|22|26-27R1|28R1G1CN4-29G1CN4-1834G1CN4	261107000	170700000	90407000	80293000	33
193	193T1	'13/1728	'982000190532966	Matched	Clade_B	Clade_B-10	DFT1_2	DFT1_2A	4329G>A;14114C>T	West Pencil Pine	-41.717464999999997	145.85587000000001	2014	01/05/2014	DFT1	Tissue	No	Yes	Yes	Unknown				Multiple		0.88600000000000001	0.92100000000000004	0.91700000000000004	0.90349999999999997	Yes	Yes	M	Unknown	No data (confirmed)			19	10	9	1R1_2R1_3R1_4R1_5_6_7_8_9_10R1_11_12_13_15_19_20R1_21R1_25_128	7	2	5	1R1-7-8|2R1-3R1-5-6-9-10R1-11-15-19|4R1-12-13|20R1|21R1|25|128	226000000	160900000	65100000	95800000	19
193	193T2	'13/1728	'982000190532966	Matched	Clade_B	Clade_B-10	DFT1_2	DFT1_2A	4329G>A;14114C>T	West Pencil Pine	-41.717464999999997	145.85587000000001	2014	01/05/2014	DFT1	Tissue	No	Yes	Yes	Unknown				Multiple		0.91700000000000004	0.97	0.91400000000000003	0.94350000000000001	Yes	Yes	M	Unknown	No data (confirmed)			19	10	9	1R1_2R1_3R1_4R1_5_6_7_8_9_10R1_11_12_13_15_19_20R1_21R1_25_128	7	2	5	1R1-7-8|2R1-3R1-5-6-9-10R1-11-15-19|4R1-12-13|20R1|21R1|25|128	226000000	160900000	65100000	95800000	19
194	194T2	Unknown	'982000190533968	Matched	Clade_B	Clade_B-10	DFT1_2	DFT1_2A	4329G>A;14114C>T	West Pencil Pine	-41.717464999999997	145.85587000000001	2014	01/05/2014	DFT1	Tissue	No	Yes	Yes	Unknown				Multiple		0.80900000000000005	0.88900000000000001	0.91	0.84899999999999998	No	Yes	F	Unknown	No data (confirmed)			19	10	9	1R1_2R1_3R1_4R1_5_6_7_8_9_10R1_11_12_13_15_19_20R1_21R1_25_128	7	2	5	1R1-7-8|2R1-3R1-5-6-9-10R1-11-15-19|4R1-12-13|20R1|21R1|25|128	226000000	160900000	65100000	95800000	19
194	194T3	Unknown	'982000190533968	Matched	Clade_B	Clade_B-10	DFT1_2	DFT1_2A	4329G>A;14114C>T	West Pencil Pine	-41.717464999999997	145.85587000000001	2014	01/05/2014	DFT1	Tissue	No	No (duplicate)	No (duplicate)	Unknown				Multiple	Duplicate DNA extraction from same tumour	8.6999999999999994E-2	0.121	0.502	0.104	No	No	F	Unknown	No data	No data
195	195T1	Unknown	'982000190524220	Matched	Clade_B	Clade_B-10	DFT1_2	DFT1_2B1	14114C>T;12362G>A;14412G>A	West Pencil Pine	-41.717464999999997	145.85587000000001	2014	01/05/2014	DFT1	Tissue	No	Yes	Yes	Unknown				Multiple		0.41	0.45800000000000002	0.69199999999999995	0.434	Yes	Yes	F	Unknown	No data (confirmed)			18	9	9	1R1_2R1_3R1_4R1_5_6_7_8_9_10R1_11_12_13_15_19_20R1_21R1_25	6	1	5	1R1-7-8|2R1-3R1-5-6-9-10R1-11-15-19|4R1-12-13|20R1|21R1|25	225000000	159900000	65100000	94800000	18
195	195T2	Unknown	'982000190524220	Matched	Clade_B	Clade_B-10	DFT1_2	DFT1_2B1	14114C>T;12362G>A;14412G>A	West Pencil Pine	-41.717464999999997	145.85587000000001	2014	01/05/2014	DFT1	Tissue	No	No (duplicate)	No (duplicate)	Unknown				Multiple	Duplicate DNA extraction from same tumour	0.88400000000000001	0.88500000000000001	0.84799999999999998	0.88449999999999995	No	Yes	F	Unknown	No data (confirmed)			18	9	9	1R1_2R1_3R1_4R1_5_6_7_8_9_10R1_11_12_13_15_19_20R1_21R1_25	6	1	5	1R1-7-8|2R1-3R1-5-6-9-10R1-11-15-19|4R1-12-13|20R1|21R1|25	225000000	159900000	65100000	94800000	18
196	196T1	Unknown	'982000191010985	Matched	Clade_B	Clade_B-10	DFT1_2	DFT1_2	14114C>T	West Pencil Pine	-41.717464999999997	145.85587000000001	2014	01/05/2014	DFT1	Tissue	No	Yes (italicised)	Yes	Unknown				Multiple		0.58299999999999996	Not Available	0.28699999999999998	0.58299999999999996	No	Yes	M	Unknown	No data (confirmed)			22	9	13	1R1_2R1_3R1_4R1_5_6_7_8_9_10R1_11_12_13_15_19_20R1_21R1_25_908_910_925_942R1	7	1	6	1R1-7-8|2R1-3R1-5-6-9-10R1-11-15-19|4R1-12-13|20R1|21R1|25|908-910-925-942R1	253300000	159900000	93400000	66500000	22
196	196T2	Unknown	'982000191010985	Matched	Clade_B	Clade_B-10	DFT1_2	DFT1_2	14114C>T	West Pencil Pine	-41.717464999999997	145.85587000000001	2014	01/05/2014	DFT1	Tissue	No	Yes (italicised)	Yes	Unknown				Multiple		0.439	0.31	0.71799999999999997	0.3745	No	Yes	M	Unknown	No data (confirmed)			18	9	9	1R1_2R1_3R1_4R1_5_6_7_8_9_10R1_11_12_13_15_19_20R1_21R1_25	6	1	5	1R1-7-8|2R1-3R1-5-6-9-10R1-11-15-19|4R1-12-13|20R1|21R1|25	225000000	159900000	65100000	94800000	18
197	197T1	Unknown	'982000190604583	Matched	Clade_B	Clade_B-10	DFT1_2	DFT1_2B1	14114C>T;12362G>A;14412G>A	West Pencil Pine	-41.717464999999997	145.85587000000001	2014	01/05/2014	DFT1	Tissue	No	Yes	Yes	Unknown				Multiple		0.52800000000000002	0.56200000000000006	0.74399999999999999	0.54500000000000004	Yes	Yes	M	Unknown	No data (confirmed)			18	9	9	1R1_2R1_3R1_4R1_5_6_7_8_9_10R1_11_12_13_15_19_20R1_21R1_25	6	1	5	1R1-7-8|2R1-3R1-5-6-9-10R1-11-15-19|4R1-12-13|20R1|21R1|25	225000000	159900000	65100000	94800000	18
197	197T2	Unknown	'982000190604583	Matched	Clade_B	Clade_B-10	DFT1_2	DFT1_2B1	14114C>T;12362G>A;14412G>A	West Pencil Pine	-41.717464999999997	145.85587000000001	2014	01/05/2014	DFT1	Tissue	No	No (duplicate)	No (duplicate)	Unknown				Multiple	Duplicate DNA extraction from same tumour	0.77	Not Available	0.754	0.77	Yes	Yes	M	Unknown	No data (confirmed)			18	9	9	1R1_2R1_3R1_4R1_5_6_7_8_9_10R1_11_12_13_15_19_20R1_21R1_25	6	1	5	1R1-7-8|2R1-3R1-5-6-9-10R1-11-15-19|4R1-12-13|20R1|21R1|25	225000000	159900000	65100000	94800000	18
199	199T1	'12/3377	'982000167812469	Matched	Clade_B	Clade_B-10	DFT1_2	DFT1_2	14114C>T	West Pencil Pine	-41.717464999999997	145.85587000000001	2014	01/05/2014	DFT1	Tissue	No	Yes	Yes	Unknown				Multiple		0.82299999999999995	0.85799999999999998	0.879	0.84050000000000002	Yes	Yes	F	Unknown	No data (confirmed)			21	9	12	1R1_2R1_3R1_4R1_5_6_7_8_9_10R1_11_12_13_15_19_20R1_21R1_25_229R1_334_803	7	1	6	1R1-7-8|2R1-3R1-5-6-9-10R1-11-15-19|4R1-12-13|20R1|21R1|25|229R1-334-803	277132044	159900000	117232044	42667956	21
199	199T1.1	'12/3377	'982000167812469	Matched	Clade_B	Clade_B-10	DFT1_2	DFT1_2	14114C>T	West Pencil Pine	-41.717464999999997	145.85587000000001	2013	01/11/2013	DFT1	Tissue	No	Yes	No (time-course sample)	Unknown				Multiple	Time-course	0.28999999999999998	0.28399999999999997	0.68500000000000005	0.28699999999999998	Yes	Yes	F	Unknown	No data (confirmed)			21	9	12	1R1_2R1_3R1_4R1_5_6_7_8_9_10R1_11_12_13_15_19_20R1_21R1_25_229R1_334_803	7	1	6	1R1-7-8|2R1-3R1-5-6-9-10R1-11-15-19|4R1-12-13|20R1|21R1|25|229R1-334-803	277132044	159900000	117232044	42667956	20
199	199T2	'12/3377	'982000167812469	Matched	Clade_B	Clade_B-10	DFT1_2	DFT1_2	14114C>T	West Pencil Pine	-41.717464999999997	145.85587000000001	2014	01/05/2014	DFT1	Tissue	No	No (duplicate)	No (duplicate)	Unknown				Multiple	Duplicate DNA extraction from same tumour	0.10100000000000001	0.14599999999999999	0.51200000000000001	0.1235	No	No	F	Unknown	No data	No data
201	201T	Unknown	'982009104834779	Matched	Clade_A2	Clade_A2-6	DFT1_6	DFT1_6	3161G>A	Glen Huon	-43.027470999999998	146.94150300000001	2014	06/01/2014	DFT1	Tissue	No	Yes	Yes	Facial/oral				Singleton		0.2	Not Available	0.54500000000000004	0.2	No	Yes	F	3	No data			21	10	11	1R1_2R1_3R1_4R1_5_6_7_8_9_10R1_11_12_13_15_19_22_26_27R1_986R2_991_1079R3	7	2	5	1R1-7-8|2R1-3R1-5-6-9-10R1-11-15-19|4R1-12-13|22|26-27R1|986R2-991|1079R3	253000000	161000000	92000000	69000000	21
202	202T1	'14/1400	'982000190608331	Matched	DFT2	DFT2	DFT2_0	DFT2_0	Novariants	Cygnet	-43.144903999999997	147.06788499999999	2014	26/03/2014	DFT2	Tissue	No	No (not DFT1)	No (not DFT1)	Facial/oral	Left side of face below eye extending through to upper palate			Multiple		0.88	Not Available	Not Available	0.88	No	Yes	M	Unknown	DFT2			25	8	17	1R2_42R4_971_1753_1761_1761G1CN4_1775_1776R1_1780_1781_1782R2_1783_1784_1787_1788_1789_1790_1791_1792_1792L1CN0_1793_1794_1795_1797_1801R2	2	1	1	1R2-42R4-971-1775-1776R1-1781-1782R2-1783-1784-1787-1791-1792-1792L1CN0-1793-1794-1795-1797|1753-1761-1761G1CN4-1780-1788-1789-1790-1801R2	194600000	77200000	117400000	-40200000	25
202	202T2	'14/1400	'982000190608331	Matched	DFT2	DFT2	DFT2_0	DFT2_0	Novariants	Cygnet	-43.144903999999997	147.06788499999999	2014	26/03/2014	DFT2	Cell-Line	No	No (not DFT1)	No (not DFT1)	Facial/oral	Left side of face below eye extending through to upper palate			Multiple	Time-course	0.998	Not Available	Not Available	0.998	No	Yes	M	Unknown	DFT2			25	8	17	1R2_42R4_971_1753_1761_1761G1CN4_1775_1776R1_1780_1781_1782R2_1783_1784_1787_1788_1789_1790_1791_1792_1792L1CN0_1793_1794_1795_1797_1801R2	2	1	1	1R2-42R4-971-1775-1776R1-1781-1782R2-1783-1784-1787-1791-1792-1792L1CN0-1793-1794-1795-1797|1753-1761-1761G1CN4-1780-1788-1789-1790-1801R2	194600000	77200000	117400000	-40200000	25
203	203T1	'14/3161	'982000356526917	Matched	DFT2	DFT2	DFT2_0	DFT2_0	Novariants	Snug	-43.077604000000001	147.15378999999999	2014	12/10/2014	DFT2	Tissue	No	No (not DFT1)	No (not DFT1)	Facial/oral	Interior and exterior upper right lip			Multiple		0.84899999999999998	Not Available	Not Available	0.84899999999999998	No	Yes	M	3	DFT2			26	8	18	1R2_42R4_971_1611_1753_1761_1761G1CN4_1775_1776R1_1780_1781_1782R2_1783_1784_1787_1788_1789_1790_1791_1792_1792L1CN0_1793_1794_1795_1797_1801R2	3	1	2	1R2-42R4-971-1775-1776R1-1781-1782R2-1783-1784-1787-1791-1792-1792L1CN0-1793-1794-1795-1797|1611|1753-1761-1761G1CN4-1780-1788-1789-1790-1801R2	195700000	77200000	118500000	-41300000	26
203	203T2	'14/3161	'982000356526917	Matched	DFT2	DFT2	DFT2_0	DFT2_0	Novariants	Snug	-43.077604000000001	147.15378999999999	2014	12/10/2014	DFT2	Tissue	No	No (not DFT1)	No (not DFT1)	Facial/oral	Interior lower right lip			Multiple		0.77800000000000002	Not Available	Not Available	0.77800000000000002	No	Yes	M	3	DFT2			26	8	18	1R2_42R4_971_1611_1753_1761_1761G1CN4_1775_1776R1_1780_1781_1782R2_1783_1784_1787_1788_1789_1790_1791_1792_1792L1CN0_1793_1794_1795_1797_1801R2	3	1	2	1R2-42R4-971-1775-1776R1-1781-1782R2-1783-1784-1787-1791-1792-1792L1CN0-1793-1794-1795-1797|1611|1753-1761-1761G1CN4-1780-1788-1789-1790-1801R2	195700000	77200000	118500000	-41300000	26
203	203T3	'14/3161	'982000356526917	Matched	DFT2	DFT2	DFT2_0	DFT2_0	Novariants	Snug	-43.077604000000001	147.15378999999999	2014	12/10/2014	DFT2	Cell-Line	No	No (not DFT1)	No (not DFT1)	Facial/oral	Interior and exterior upper right lip			Multiple	Time-course	0.94	Not Available	Not Available	0.94	No	Yes	M	3	DFT2			26	8	18	1R2_42R4_971_1611_1753_1761_1761G1CN4_1775_1776R1_1780_1781_1782R2_1783_1784_1787_1788_1789_1790_1791_1792_1792L1CN0_1793_1794_1795_1797_1801R2	3	1	2	1R2-42R4-971-1775-1776R1-1781-1782R2-1783-1784-1787-1791-1792-1792L1CN0-1793-1794-1795-1797|1611|1753-1761-1761G1CN4-1780-1788-1789-1790-1801R2	195700000	77200000	118500000	-41300000	26
204	204T	Unknown	Unknown	Unmatched	Clade_B	Clade_B-204T	DFT1_2	DFT1_2	14114C>T	Unknown	-42.902220999999997	147.83382900000001	2012	01/05/2012	DFT1	Cell-Line	No	Yes (italicised)	No (unknown location)	Neck				Singleton		1	Not Available	0.92400000000000004	1	No	Yes	M	Unknown	Strain 2 (March 2012), strain 2 evolved tetraploid (May 2012)		Tetraploid (8)	54	32	22	1R1_2R1_2R1BM1_3R1_4R1_5_6_7_8_9_10R1_11_12_13_15_18R42_19_20R1_21R1_25_37R1_98R1_120R1_150R2_193R2_194R2_253R1_259R2_261R2_263R2_379R3_829_833R2_840R1_848_851_853_854_874_889R1_931_1015_1016_1017_1018_1037_1042R1_1043_1044_203R4_1838_1839_1866_1841	8	2	6	1R1-7-8|2R1-3R1-5-6-9-10R1-11-15-19|2R1BM1-18R42-203R4-840R1-848-851-853-874-1015-1017-1042R1-1044-1839|4R1-12-13|20R1|21R1|25|37R1-98R1-120R1-150R2-193R2-194R2-253R1-259R2-261R2-263R2-379R3-829-833R2-854-889R1-931-1016-1018-1037-1043-1838-1841-1866	2894086147	1528300000	1365786147	162513853
205	205T1	Unknown	'982009106161656	Unmatched	Clade_A1	Clade_A1-3A1	DFT1_3	DFT1_3A1	1828A>G;3255G>A;14130G>A	Neika	-42.951489000000002	147.222464	2015	04/02/2015	DFT1	Tissue	No	Yes	Yes	Facial/oral	Interior upper left lip			Singleton		0.85099999999999998	Not Available	0.93500000000000005	0.85099999999999998	No	Yes	F	2	No data (confirmed)			20	10	10	1R1_2R1_3R1_4R1_5_6_7_8_9_10R1_11_12_13_15_19_23_24_72_77_92	7	2	5	1R1-7-8|2R1-3R1-5-6-9-10R1-11-15-19|4R1-12-13|23-24|72|77|92	295900000	160900000	135000000	25900000	20
206	206T1	Unknown	'982009105828528	Matched	Clade_A1	Clade_A1-3A1	DFT1_3	DFT1_3A1	1828A>G;3255G>A;14130G>A	Neika	-42.951489000000002	147.222464	2015	04/02/2015	DFT1	Tissue	No	Yes	Yes	Facial/oral	Lower right lip			Multiple		0.65800000000000003	Not Available	0.82499999999999996	0.65800000000000003	No	Yes	F	3	No data (confirmed)			20	10	10	1R1_2R1_3R1_4R1_5_6_7_8_9_10R1_11_12_13_15_19_23_24_72_77_92	7	2	5	1R1-7-8|2R1-3R1-5-6-9-10R1-11-15-19|4R1-12-13|23-24|72|77|92	295900000	160900000	135000000	25900000	20
206	206T2	Unknown	'982009105828528	Matched	Clade_A1	Clade_A1-3A1	DFT1_3	DFT1_3A1	1828A>G;3255G>A;14130G>A	Neika	-42.951489000000002	147.222464	2015	04/02/2015	DFT1	Tissue	No	Yes	Yes	Facial/oral	Upper right lip			Multiple		0.48899999999999999	Not Available	0.79800000000000004	0.48899999999999999	No	Yes	F	3	No data (confirmed)			22	10	12	1R1_2R1_3R1_4R1_5_6_7_8_9_10R1_11_12_13_15_19_21R2_23_24_72_77_92_956	8	2	6	1R1-7-8|2R1-3R1-5-6-9-10R1-11-15-19|4R1-12-13|21R2-956|23-24|72|77|92	309400000	160900000	148500000	12400000	21
206	206T3	Unknown	'982009105828528	Matched	Clade_A1	Clade_A1-3A1	DFT1_3	DFT1_3A1	1828A>G;3255G>A;14130G>A	Neika	-42.951489000000002	147.222464	2015	04/02/2015	DFT1	Tissue	No	Yes	Yes	Facial/oral	Right hand side below nose			Multiple		0.72499999999999998	Not Available	0.873	0.72499999999999998	No	Yes	F	3	No data (confirmed)			19	10	9	1R1_2R1_3R1_4R1_5_6_7_8_9_10R1_11_12_13_15_19_23_24_72_77	6	2	4	1R1-7-8|2R1-3R1-5-6-9-10R1-11-15-19|4R1-12-13|23-24|72|77	295100000	160900000	134200000	26700000	19
206	206T4	Unknown	'982009105828528	Matched	Clade_A1	Clade_A1-3A1	DFT1_3	DFT1_3A1	1828A>G;3255G>A;14130G>A	Neika	-42.951489000000002	147.222464	2015	04/02/2015	DFT1	Tissue	No	Yes	Yes	Facial/oral	Upper front left side of face below nose extending to lip			Multiple		0.79200000000000004	Not Available	0.86099999999999999	0.79200000000000004	No	Yes	F	3	No data (confirmed)			20	10	10	1R1_2R1_3R1_4R1_5_6_7_8_9_10R1_11_12_13_15_19_23_24_72_77_92	7	2	5	1R1-7-8|2R1-3R1-5-6-9-10R1-11-15-19|4R1-12-13|23-24|72|77|92	295900000	160900000	135000000	25900000	20
206	206T5	Unknown	'982009105828528	Matched	Clade_A1	Clade_A1-3A1	DFT1_3	DFT1_3A1	1828A>G;3255G>A;14130G>A	Neika	-42.951489000000002	147.222464	2015	04/02/2015	DFT1	Tissue	No	Yes	Yes	Facial/oral	Upper left lip			Multiple		0.51400000000000001	Not Available	0.69299999999999995	0.51400000000000001	No	Yes	F	3	No data (confirmed)			20	10	10	1R1_2R1_3R1_4R1_5_6_7_8_9_10R1_11_12_13_15_19_23_24_72_77_92	7	2	5	1R1-7-8|2R1-3R1-5-6-9-10R1-11-15-19|4R1-12-13|23-24|72|77|92	295900000	160900000	135000000	25900000	20
207	207T1	Unknown	'982000356444429	Matched	Clade_A1	Clade_A1-3A1	DFT1_3	DFT1_3A1	1828A>G;3255G>A;14130G>A	Grove	-42.904758000000001	147.085824	2015	15/02/2015	DFT1	Tissue	No	Yes	Yes	Facial/oral	Front upper lip extending back to upper palate			Multiple		0.88100000000000001	Not Available	0.91900000000000004	0.88100000000000001	No	Yes	F	3	No data			17	9	8	1R1_2R1_3R1_4R1_5_6_7_8_9_10R1_11_12_13_15_19_23_24	4	1	3	1R1-7-8|2R1-3R1-5-6-9-10R1-11-15-19|4R1-12-13|23-24	276200000	159900000	116300000	43600000	17
207	207T2	Unknown	'982000356444429	Matched	Clade_A1	Clade_A1-3A1	DFT1_3	DFT1_3A1	1828A>G;3255G>A;14130G>A	Grove	-42.904758000000001	147.085824	2015	15/02/2015	DFT1	Tissue	No	Yes	Yes	Facial/oral	Exterior lower right lip			Multiple		0.88600000000000001	0.91700000000000004	0.91	0.90149999999999997	Yes	Yes	F	3	No data			18	10	8	1R1_2R1_3R1_4R1_5_6_7_8_9_10R1_11_12_13_15_19_23_24_202R2	5	2	3	1R1-7-8|2R1-3R1-5-6-9-10R1-11-15-19|4R1-12-13|23-24|202R2	491400000	375100000	116300000	258800000	18
207	207T3	Unknown	'982000356444429	Matched	Clade_A1	Clade_A1-3A1	DFT1_3	DFT1_3A1	1828A>G;3255G>A;14130G>A	Grove	-42.904758000000001	147.085824	2015	15/02/2015	DFT1	Tissue	No	Yes	Yes	Facial/oral	Interior upper right lip			Multiple		0.90800000000000003	Not Available	0.92300000000000004	0.90800000000000003	No	Yes	F	3	No data			17	9	8	1R1_2R1_3R1_4R1_5_6_7_8_9_10R1_11_12_13_15_19_23_24	4	1	3	1R1-7-8|2R1-3R1-5-6-9-10R1-11-15-19|4R1-12-13|23-24	276200000	159900000	116300000	43600000	17
208	208T1	Unknown	Unknown	Unmatched	Clade_A2	Clade_A2-3	DFT1_0	DFT1_0	Novariants	Richmond	-42.728265999999998	147.42703	2015	28/02/2015	DFT1	Tissue	No	No (duplicate)	No (duplicate)	Unknown				Multiple	Duplicate DNA extraction from same tumour	0.29399999999999998	Not Available	Not Available	0.29399999999999998	No	Yes	F	1	No data			20	9	11	1R1_2R1_3R1_4R1_5_6_7_8_9_10R1_11_12_13_15_19_22_26_27R1_808_1021	6	1	5	1R1-7-8|2R1-3R1-5-6-9-10R1-11-15-19|4R1-12-13|22|26-27R1|808-1021	246000000	159900000	86100000	73800000	20
208	208T1a	Unknown	Unknown	Unmatched	Clade_A2	Clade_A2-3	DFT1_0	DFT1_0	Novariants	Richmond	-42.728265999999998	147.42703	2015	28/02/2015	DFT1	Tissue	No	Yes	Yes	Unknown				Multiple		0.496	0.48199999999999998	Not Available	0.48899999999999999	Yes	Yes	F	1	No data			20	9	11	1R1_2R1_3R1_4R1_5_6_7_8_9_10R1_11_12_13_15_19_22_26_27R1_808_1021	6	1	5	1R1-7-8|2R1-3R1-5-6-9-10R1-11-15-19|4R1-12-13|22|26-27R1|808-1021	246000000	159900000	86100000	73800000	20
208	208T2	Unknown	Unknown	Unmatched	Clade_A2	Clade_A2-3	DFT1_0	DFT1_0	Novariants	Richmond	-42.728265999999998	147.42703	2015	28/02/2015	DFT1	Tissue	No	No (duplicate)	No (duplicate)	Unknown				Multiple	Duplicate DNA extraction from same tumour	0.53600000000000003	Not Available	Not Available	0.53600000000000003	No	Yes	F	1	No data	M5 loss		26	10	16	1R1_2R1_3R1_4R1_5_6_6BM9_7_8_9_10R1_11_11BM9_12_13_15_16R9_17R9_18R9_19_22_26_27R1_69R4_808_1021	8	2	6	1R1-7-8|2R1-3R1-5-6-9-10R1-11-15-19|4R1-12-13|6BM9-11BM9-16R9-17R9-18R9|22|26-27R1|69R4|808-1021	266707000	172400000	94307000	78093000	18
208	208T2a	Unknown	Unknown	Unmatched	Clade_A2	Clade_A2-3	DFT1_0	DFT1_0	Novariants	Richmond	-42.728265999999998	147.42703	2015	28/02/2015	DFT1	Tissue	No	Yes	Yes	Unknown				Multiple		0.54800000000000004	Not Available	Not Available	0.54800000000000004	Yes	Yes	F	1	No data	M5 loss		26	10	16	1R1_2R1_3R1_4R1_5_6_6BM9_7_8_9_10R1_11_11BM9_12_13_15_16R9_17R9_18R9_19_22_26_27R1_69R4_808_1021	8	2	6	1R1-7-8|2R1-3R1-5-6-9-10R1-11-15-19|4R1-12-13|6BM9-11BM9-16R9-17R9-18R9|22|26-27R1|69R4|808-1021	266707000	172400000	94307000	78093000	19
209	209T1	'15/0872	'SDD000000100315	Matched	Clade_A1	Clade_A1-3A	DFT1_3	DFT1_3A	1828A>G;3255G>A	Crabtree	-42.904758000000001	147.085824	2015	10/03/2015	DFT1	Tissue	No	Yes	Yes	Facial/oral	Chin			Multiple		0.56599999999999995	Not Available	0.65200000000000002	0.56599999999999995	No	Yes	M	2	No data		Tetraploid (1)	19	10	9	1R1_2R1_3R1_4R1_5_6_7_8_9_10R1_11_12_13_15_19_23_24_202R1_819	6	2	4	1R1-7-8|2R1-3R1-5-6-9-10R1-11-15-19|4R1-12-13|23-24|202R1|819	502400000	375100000	127300000	247800000
209	209T3	'15/0872	'SDD000000100315	Matched	Clade_A1	Clade_A1-3A	DFT1_3	DFT1_3A	1828A>G;3255G>A	Crabtree	-42.904758000000001	147.085824	2015	10/03/2015	DFT1	Tissue	No	Yes	Yes	Facial/oral	Interior lower right lip			Multiple		0.95899999999999996	Not Available	0.875	0.95899999999999996	No	Yes	M	2	No data	M5 gain	Tetraploid (1)	36	16	20	1R1_2R1_3R1_4R1_5_6_6G2CN4_7_8_9_10R1_11_11G2CN4_12_13_15_284R2_1803R2_285R2_19_23_24_69R2_114_809_811_819_840R2_911R1_922_977_979_1019R2_1020R2_1028_1030	8	3	5	1R1-7-8|2R1-3R1-5-6-9-10R1-11-15-19|4R1-12-13|6G2CN4-11G2CN4-114-284R2-285R2-1803R2|23-24|69R2|809-811-840R2-911R1-922-977-979-1019R2-1020R2-1028-1030|819	951007000	181307000	769700000	-588393000
210	210T	Unknown	'R0000000006095	Matched	Non-DFTD	Non-DFTD	Non-DFTD	Non-DFTD	-	Lymington	-43.203961999999997	147.05523199999999	2014	15/09/2014	Non-DFTD	Tissue	No	No (not DFT1)	No (not DFT1)	Facial/oral	Left hand side jaw		Sebaceous cyst	Singleton		Not Available	Not Available	Not Available	N/A	No	No	M	3	Non-DFTD	No data
213	213T2	'15/0953	'S00000000006241	Matched	Clade_A1	Clade_A1-3A1	DFT1_3	DFT1_3A1	1828A>G;3255G>A;14130G>A	Leslie Vale	-42.951489000000002	147.222464	2015	03/03/2015	DFT1	Tissue	No	Yes	Yes	Facial/oral	Upper left gum			Singleton		0.73099999999999998	Not Available	0.85499999999999998	0.73099999999999998	No	Yes	F	2	No data			20	10	10	1R1_2R1_3R1_4R1_5_6_7_8_9_10R1_11_12_13_15_19_23_24_72_77_912	7	2	5	1R1-7-8|2R1-3R1-5-6-9-10R1-11-15-19|4R1-12-13|23-24|72|77|912	296100000	160900000	135200000	25700000	20
214	214T	'07/1875	'982009102327363	Unmatched	Clade_A2	Clade_A2-8	DFT1_1	DFT1_1	10133C>T	Reedy Marsh	-41.401451999999999	146.740793	2007	08/06/2007	DFT1	Cell-Line	No	Yes	Yes	Unknown				Singleton		0.96199999999999997	1.024	Not Available	0.99299999999999999	Yes	Yes	M	4	Strain 1 tetraploid	M5 loss	Tetraploid (5)	30	16	14	1R1_2R1_3R1_4R1_5_6_6BM17_7_8_9_10R1_11_11BM17_12_13_15_16R17_17R17_18R17_19_22_26_27R1_34R11_35R11_36R11_37R11_38R11_39R11_69R3	7	2	5	1R1-7-8|2R1-3R1-5-6-9-10R1-11-15-19|4R1-12-13|6BM17-11BM17-16R17-17R17-18R17|22|26-27R1|34R11-35R11-36R11-37R11-38R11-39R11-69R3	342707000	252300000	90407000	161893000
215	215T	'05/2569	'985120016021248	Unmatched	Clade_B	Clade_B-4	Unknown	Unknown	Unknown	Fentonbury	-42.653722000000002	146.76054099999999	2005	27/06/2005	DFT1	Cell-Line	No	Yes	Yes	Unknown				Singleton		Not Available	0.94699999999999995	Not Available	0.94699999999999995	Yes	No	M	3	Strain 2	No data
216	216T	'05/2359	Unknown	Unmatched	Clade_A2	Clade_A2-2	Unknown	Unknown	Unknown	Tea Tree	-42.676752	147.35646	2005	16/09/2005	DFT1	Cell-Line	No	Yes	Yes	Unknown				Singleton		Not Available	0.95399999999999996	Not Available	0.95399999999999996	Yes	No	F	Unknown	Strain 1	No data
217	217T	'06/2062	Unknown	Unmatched	Clade_A1	Clade_A1-2	Unknown	Unknown	Unknown	Brighton	-42.719988000000001	147.26800700000001	2006	26/07/2006	DFT1	Cell-Line	No	Yes	Yes	Unknown				Singleton		Not Available	0.96699999999999997	Not Available	0.96699999999999997	Yes	No	F	Unknown	Strain 3	No data
218	218T	'06/2673	'982009104842051	Unmatched	Clade_A2	Clade_A2-8	DFT1_1	DFT1_1	10133C>T	Buckland	-42.613394	147.70647	2006	15/09/2006	DFT1	Cell-Line	No	Yes	No (cell line mislabelling or contamination)	Unknown				Singleton		0.99399999999999999	1.012	Not Available	1.0029999999999999	Yes	Yes	M	1	Strain 4	M5 loss	Tetraploid (5)	40	15	25	1R1_2R1_2R1BM12_3R1_3R1BM12_4R1_5_6_6BM17_7_8_9_9BM12_10R1_10R1BM12_11_11BM17_12_13_15_15BM12_16R17_17R17_18R17_19_22_26_27R1_34R12_35R12_36R12_37R12_38R12_39R12_80_262_984_1014_1809_1840	9	2	7	1R1-7-8|2R1-3R1-5-6-9-10R1-11-15-19|2R1BM12-3R1BM12-9BM12-10R1BM12-15BM12-262-1014-1809-1840|4R1-12-13|6BM17-11BM17-16R17-17R17-18R17|22|26-27R1|34R12-35R12-36R12-37R12-38R12-39R12|80-984	550048000	239800000	310248000	-70448000
219	219T	'06/2887	'982009104354742	Unmatched	Clade_A2	Clade_A2-4	DFT1_24	DFT1_24	3716C>T	St Marys	-41.588864000000001	148.182413	2006	10/06/2006	DFT1	Cell-Line	No	Yes	Yes	Unknown				Singleton		0.97099999999999997	Not Available	Not Available	0.97099999999999997	No	Yes	F	1	Strain 1	M5 loss		41	21	20	1R1_2R1_2R1BM8_3R1_3R1BM8_4R1_5_6_6BM12_7_8_9_9BM8_10R1_10R1BM8_11_11BM12_12_13_15_15BM8_16R12_17R12_18R12_19_22_26_27R1_28R3_28R3G1CN4_28R3G1CN5_28R3G1CN6_34R8_35R8_36R8_37R8_38R8_39R8_69R5_118_967	9	3	6	1R1-7-8|2R1-3R1-5-6-9-10R1-11-15-19|2R1BM8-3R1BM8-9BM8-10R1BM8-15BM8|4R1-12-13|6BM12-11BM12-16R12-17R12-18R12-118|22|26-27R1|28R3-28R3G1CN4|28R3G1CN5-28R3G1CN6-34R8-35R8-36R8-37R8-38R8-39R8-69R5-967	502207000	258800000	243407000	15393000	31
220	220T	'07/0192	'982009100873958	Unmatched	Clade_A1	Clade_A1-1	DFT1_0	DFT1_0	Novariants	Freycinet	-42.194752999999999	148.30324300000001	2007	17/01/2007	DFT1	Cell-Line	No	Yes	Yes	Unknown				Singleton		0.995	1	Not Available	0.99750000000000005	Yes	Yes	M	2	Strain 4			44	31	13	1R1_2R1_2R1BM2_3R1_3R1BM2_4R1_5_6_7_8_9_9BM2_10R1_10R1BM2_11_12_13_15_15BM2_19_34R2_35R2_36R2_37R2_38R2_39R2_48R1_55R1_56R1_63_63G1CN4_63G1CN5_63G1CN6_64_64G1CN4_64G1CN5_64G1CN6_65_65G1CN4_65G1CN5_65G1CN6_66_70_1832	9	4	5	1R1-7-8|2R1-3R1-5-6-9-10R1-11-15-19|2R1BM2-3R1BM2-9BM2-10R1BM2-15BM2|4R1-12-13|34R2-35R2-36R2-37R2-38R2-39R2|48R1-55R1-56R1-63-63G1CN4-64-64G1CN4-65-65G1CN4-66|63G1CN5-63G1CN6-64G1CN5-64G1CN6-65G1CN5-65G1CN6|70|1832	507800000	302600000	205200000	97400000	44
221	221T	'09/0765	Unknown	Unmatched	Clade_A2	Clade_A2-4	DFT1_9	DFT1_9	4266G>A	Triabunna	-42.512636000000001	147.92181400000001	2009	27/02/2009	DFT1	Cell-Line	No	Yes	Yes	Unknown				Singleton		0.97899999999999998	0.98599999999999999	0.95299999999999996	0.98250000000000004	Yes	Yes	F	3	Strain 1 evolved tetraploid	M5 loss	Tetraploid (3)	36	16	20	1R1_2R1_2R1BM9_3R1_3R1BM9_4R1_5_6_6BM12_7_8_9_9BM9_10R1_10R1BM9_11_11BM12_12_13_15_15BM9_16R12_17R12_18R12_19_22_26_27R1_34R9_35R9_36R9_37R9_38R9_39R9_69R10_118	8	2	6	1R1-7-8|2R1-3R1-5-6-9-10R1-11-15-19|2R1BM9-3R1BM9-9BM9-10R1BM9-15BM9|4R1-12-13|6BM12-11BM12-16R12-17R12-18R12-118|22|26-27R1|34R9-35R9-36R9-37R9-38R9-39R9-69R10	495707000	252300000	243407000	8893000
222	222T1	Unknown	'982000190698061	Matched	Clade_B	Clade_B-10	DFT1_2	DFT1_2	14114C>T	West Pencil Pine	-41.717464999999997	145.85587000000001	2015	01/02/2015	DFT1	Tissue	No	Yes	Yes	Unknown				Multiple		0.82099999999999995	0.81799999999999995	0.85199999999999998	0.81950000000000001	Yes	Yes	F	3	No data (confirmed)			21	9	12	1R1_2R1_3R1_4R1_5_6_7_8_9_10R1_11_12_13_15_19_20R1_21R1_25_227_228_946	7	1	6	1R1-7-8|2R1-3R1-5-6-9-10R1-11-15-19|4R1-12-13|20R1|21R1|25|227-228-946	234200000	159900000	74300000	85600000	21
222	222T2a	Unknown	'982000190698061	Matched	Clade_B	Clade_B-10	DFT1_2	DFT1_2	14114C>T	West Pencil Pine	-41.717464999999997	145.85587000000001	2015	01/02/2015	DFT1	Tissue	No	Yes	Yes	Unknown				Multiple		0.79500000000000004	0.79800000000000004	0.84199999999999997	0.79649999999999999	Yes	Yes	F	3	No data (confirmed)			18	9	9	1R1_2R1_3R1_4R1_5_6_7_8_9_10R1_11_12_13_15_19_20R1_21R1_25	6	1	5	1R1-7-8|2R1-3R1-5-6-9-10R1-11-15-19|4R1-12-13|20R1|21R1|25	225000000	159900000	65100000	94800000	18
223	223T1	Unknown	'982000167782358	Matched	Clade_A2	Clade_A2-11	DFT1_0	DFT1_0	Novariants	West Pencil Pine	-41.717464999999997	145.85587000000001	2015	01/02/2015	DFT1	Tissue	No	Yes	Yes	Unknown				Multiple		0.34200000000000003	0.38300000000000001	0.61	0.36249999999999999	Yes	Yes	M	2	No data (confirmed)	M5 loss		33	19	14	1R1_2R1_3R1_4R1_5_5G1CN4_5G1CN5_6_6BM17_7_8_9_10R1_11_11BM17_12_13_15_16R17_17R17_18R17_19_22_26_27R1_28R1_28R1G1CN4_29_29G1CN4_31_32_1834_1834G1CN4	9	4	5	1R1-7-8|2R1-3R1-5-6-9-10R1-11-15-19|4R1-12-13|5G1CN4-28R1-29-31-32-1834|5G1CN5|6BM17-11BM17-16R17-17R17-18R17|22|26-27R1|28R1G1CN4-29G1CN4-1834G1CN4	261107000	170700000	90407000	80293000	33
223	223T1a	Unknown	'982000167782358	Matched	Clade_A2	Clade_A2-11	DFT1_0	DFT1_0	Novariants	West Pencil Pine	-41.717464999999997	145.85587000000001	2015	01/02/2015	DFT1	Tissue	No	No (duplicate)	No (duplicate)	Unknown				Multiple	Duplicate DNA extraction from same tumour	0.16	0.192	0.52	0.17599999999999999	No	No	M	2	No data (confirmed)	No data
224	224T1	Unknown	'982000167788545	Matched	Clade_B	Clade_B-10	Unknown	Unknown	Unknown	West Pencil Pine	-41.717464999999997	145.85587000000001	2015	01/02/2015	DFT1	Tissue	No	Yes	Yes	Unknown				Singleton		Not Available	0.89200000000000002	Not Available	0.89200000000000002	Yes	No	F	5	No data (confirmed)	No data
226	226T1	Unknown	'982000167787241	Matched	Clade_A2	Clade_A2-11	Unknown	Unknown	Unknown	West Pencil Pine	-41.717464999999997	145.85587000000001	2015	01/02/2015	DFT1	Tissue	No	Yes	Yes	Unknown				Multiple	Time-course	Not Available	0.97499999999999998	Not Available	0.97499999999999998	Yes	No	M	3	No data (confirmed)	No data
226	226T1.1	Unknown	'982000167787241	Matched	Clade_A2	Clade_A2-11	DFT1_0	DFT1_0	Novariants	West Pencil Pine	-41.717464999999997	145.85587000000001	2014	01/11/2014	DFT1	Tissue	No	Yes	Yes	Unknown				Multiple		0.59199999999999997	0.58699999999999997	0.752	0.58950000000000002	Yes	Yes	M	3	No data (confirmed)	M5 loss		33	19	14	1R1_2R1_3R1_4R1_5_5G1CN4_5G1CN5_6_6BM17_7_8_9_10R1_11_11BM17_12_13_15_16R17_17R17_18R17_19_22_26_27R1_28R1_28R1G1CN4_29_29G1CN4_31_32_1834_1834G1CN4	9	4	5	1R1-7-8|2R1-3R1-5-6-9-10R1-11-15-19|4R1-12-13|5G1CN4-28R1-29-31-32-1834|5G1CN5|6BM17-11BM17-16R17-17R17-18R17|22|26-27R1|28R1G1CN4-29G1CN4-1834G1CN4	261107000	170700000	90407000	80293000	33
226	226T4.1	Unknown	'982000167787241	Matched	Clade_A2	Clade_A2-11	DFT1_35	DFT1_35A	6106G>A;11457T>C	West Pencil Pine	-41.717464999999997	145.85587000000001	2014	01/11/2014	DFT1	Tissue	No	Yes	Yes	Unknown				Multiple		0.57599999999999996	0.51400000000000001	0.34300000000000003	0.54500000000000004	Yes	Yes	M	3	No data (confirmed)	M5 loss		33	19	14	1R1_2R1_3R1_4R1_5_5G1CN4_5G1CN5_6_6BM17_7_8_9_10R1_11_11BM17_12_13_15_16R17_17R17_18R17_19_22_26_27R1_28R1_28R1G1CN4_29_29G1CN4_31_32_1834_1834G1CN4	9	4	5	1R1-7-8|2R1-3R1-5-6-9-10R1-11-15-19|4R1-12-13|5G1CN4-28R1-29-31-32-1834|5G1CN5|6BM17-11BM17-16R17-17R17-18R17|22|26-27R1|28R1G1CN4-29G1CN4-1834G1CN4	261107000	170700000	90407000	80293000	33
227	227T1	Unknown	'982000167790882	Matched	Clade_A2	Clade_A2-11	DFT1_0	DFT1_0	Novariants	West Pencil Pine	-41.717464999999997	145.85587000000001	2015	01/02/2015	DFT1	Tissue	No	Yes	Yes	Unknown				Multiple		0.90600000000000003	0.93400000000000005	Not Available	0.92	Yes	Yes	F	2	No data (confirmed)	M5 loss		34	20	14	1R1_2R1_3R1_4R1_5_5G1CN4_5G1CN5_6_6BM17_7_8_9_10R1_11_11BM17_12_13_15_16R17_17R17_18R17_19_22_26_27R1_28R1_28R1G1CN4_29_29G1CN4_31_32_49R5_1834_1834G1CN4	10	5	5	1R1-7-8|2R1-3R1-5-6-9-10R1-11-15-19|4R1-12-13|5G1CN4-28R1-29-31-32-1834|5G1CN5|6BM17-11BM17-16R17-17R17-18R17|22|26-27R1|28R1G1CN4-29G1CN4-1834G1CN4|49R5	261907000	171500000	90407000	81093000	34
227	227T2	Unknown	'982000167790882	Matched	Clade_A2	Clade_A2-11	DFT1_0	DFT1_0	Novariants	West Pencil Pine	-41.717464999999997	145.85587000000001	2015	01/02/2015	DFT1	Tissue	No	Yes	Yes	Unknown				Multiple		0.90200000000000002	1	Not Available	0.95099999999999996	No	Yes	F	2	No data (confirmed)	M5 loss		34	20	14	1R1_2R1_3R1_4R1_5_5G1CN4_5G1CN5_6_6BM17_7_8_9_10R1_11_11BM17_12_13_15_16R17_17R17_18R17_19_22_26_27R1_28R1_28R1G1CN4_29_29G1CN4_31_32_49R5_1834_1834G1CN4	10	5	5	1R1-7-8|2R1-3R1-5-6-9-10R1-11-15-19|4R1-12-13|5G1CN4-28R1-29-31-32-1834|5G1CN5|6BM17-11BM17-16R17-17R17-18R17|22|26-27R1|28R1G1CN4-29G1CN4-1834G1CN4|49R5	261907000	171500000	90407000	81093000	34
228	228T1	Unknown	'982000190700288	Matched	Clade_A2	Clade_A2-11	DFT1_0	DFT1_0	Novariants	West Pencil Pine	-41.717464999999997	145.85587000000001	2015	01/02/2015	DFT1	Tissue	No	Yes	Yes	Unknown				Multiple		0.93700000000000006	0.996	Not Available	0.96650000000000003	Yes	Yes	F	3	No data (confirmed)	M5 loss		33	19	14	1R1_2R1_3R1_4R1_5_5G1CN4_5G1CN5_6_6BM17_7_8_9_10R1_11_11BM17_12_13_15_16R17_17R17_18R17_19_22_26_27R1_28R1_28R1G1CN4_29_29G1CN4_31_32_1834_1834G1CN4	9	4	5	1R1-7-8|2R1-3R1-5-6-9-10R1-11-15-19|4R1-12-13|5G1CN4-28R1-29-31-32-1834|5G1CN5|6BM17-11BM17-16R17-17R17-18R17|22|26-27R1|28R1G1CN4-29G1CN4-1834G1CN4	261107000	170700000	90407000	80293000	33
228	228T2	Unknown	'982000190700288	Matched	Clade_B	Clade_B-10	DFT1_2	DFT1_2	14114C>T	West Pencil Pine	-41.717464999999997	145.85587000000001	2015	01/02/2015	DFT1	Tissue	No	Yes	Yes	Unknown				Multiple		0.99	1.008	0.97799999999999998	0.999	Yes	Yes	F	3	No data (confirmed)			18	9	9	1R1_2R1_3R1_4R1_5_6_7_8_9_10R1_11_12_13_15_19_20R1_21R1_25	6	1	5	1R1-7-8|2R1-3R1-5-6-9-10R1-11-15-19|4R1-12-13|20R1|21R1|25	225000000	159900000	65100000	94800000	18
236	236T3	Unknown	'982009106522128	Matched	Clade_B	Clade_B-8	DFT1_2	DFT1_2	14114C>T	Bronte Park	-42.124875000000003	146.46679	2015	15/05/2015	DFT1	Tissue	No	Yes	Yes	Facial/oral	Lower right lip			Singleton		0.81	Not Available	0.86699999999999999	0.81	No	Yes	F	2	No data (confirmed)			24	13	11	1R1_2R1_3R1_4R1_5_6_7_8_9_10R1_11_12_13_15_19_20R1_21R1_25_47R2_89_89G1CN4_96_111_111G1CN4	8	2	6	1R1-7-8|2R1-3R1-5-6-9-10R1-11-15-19|4R1-12-13|20R1|21R1|25|47R2-96|89-89G1CN4-111-111G1CN4	300500000	166700000	133800000	32900000	24
257	257T3	Unknown	'982009106498256	Matched	Clade_B	Clade_B-6	DFT1_0	DFT1_0	Novariants	Fentonbury	-42.653722000000002	146.76054099999999	2015	19/05/2015	DFT1	Tissue	No	Yes	Yes	Facial/oral	right hand side lower jaw			Singleton		0.64900000000000002	Not Available	0.76300000000000001	0.64900000000000002	No	Yes	F	2	No data (confirmed)			19	9	10	1R1_2R1_3R1_4R1_5_6_7_8_9_10R1_11_12_13_15_19_20R1_21R1_25_50	7	1	6	1R1-7-8|2R1-3R1-5-6-9-10R1-11-15-19|4R1-12-13|20R1|21R1|25|50	236100000	159900000	76200000	83700000	19
267	267T1	Unknown	'982000123159734	Matched	Clade_A2	Clade_A2-2	DFT1_14	DFT1_14	7329A>G	Buckland	-42.613394	147.70647	2015	15/05/2015	DFT1	Tissue	No	Yes	Yes	Facial/oral	Lower left lip			Singleton		0.39300000000000002	Not Available	0.64500000000000002	0.39300000000000002	No	Yes	M	2	No data (confirmed)	M5 loss		23	9	14	1R1_2R1_3R1_4R1_5_6_6BM8_7_8_9_10R1_11_11BM8_12_13_15_16R8_17R8_18R8_19_22_117_1004	6	1	5	1R1-7-8|2R1-3R1-5-6-9-10R1-11-15-19|4R1-12-13|6BM8-11BM8-16R8-17R8-18R8-117|22|1004	277407000	159900000	117507000	42393000	23
272	272T1	Unknown	'982000123216701	Matched	Clade_B	Clade_B-5	DFT1_2	DFT1_2	14114C>T	Buckland	-42.613394	147.70647	2015	06/05/2015	DFT1	Tissue	No	Yes (italicised)	Yes	Facial/oral	Left hand side base of jaw			Multiple		0.83399999999999996	Not Available	0.91600000000000004	0.83399999999999996	No	Yes	F	2	No data			18	9	9	1R1_2R1_3R1_4R1_5_6_7_8_9_10R1_11_12_13_15_19_20R1_21R1_25	6	1	5	1R1-7-8|2R1-3R1-5-6-9-10R1-11-15-19|4R1-12-13|20R1|21R1|25	225000000	159900000	65100000	94800000	18
272	272T2	Unknown	'982000123216701	Matched	Clade_B	Clade_B-5	DFT1_2	DFT1_2	14114C>T	Buckland	-42.613394	147.70647	2015	06/05/2015	DFT1	Tissue	No	Yes (italicised)	Yes	Facial/oral	Left upper lip			Multiple		0.85099999999999998	Not Available	0.89	0.85099999999999998	No	Yes	F	2	No data			19	9	10	1R1_2R1_3R1_4R1_5_6_7_8_9_10R1_11_12_13_15_19_20R1_21R1_25_933	7	1	6	1R1-7-8|2R1-3R1-5-6-9-10R1-11-15-19|4R1-12-13|20R1|21R1|25|933	225900000	159900000	66000000	93900000	19
272	272T3	Unknown	'982000123216701	Matched	Clade_B	Clade_B-5	DFT1_2	DFT1_2	14114C>T	Buckland	-42.613394	147.70647	2015	06/05/2015	DFT1	Tissue	No	Yes (italicised)	Yes	Facial/oral	Left upper lip near front			Multiple		0.54500000000000004	Not Available	0.68400000000000005	0.54500000000000004	No	Yes	F	2	No data			18	9	9	1R1_2R1_3R1_4R1_5_6_7_8_9_10R1_11_12_13_15_19_20R1_21R1_25	6	1	5	1R1-7-8|2R1-3R1-5-6-9-10R1-11-15-19|4R1-12-13|20R1|21R1|25	225000000	159900000	65100000	94800000	18
327	327T	Unknown	'SDD000000310315	Matched	Clade_A1	Clade_A1-3A1	DFT1_3	DFT1_3A1	1828A>G;3255G>A;14130G>A	Margate	-43.034731999999998	147.272053	2015	31/03/2015	DFT1	Tissue	No	Yes	Yes	Facial/oral	Right hand side of face			Singleton		0.85399999999999998	Not Available	0.80800000000000005	0.85399999999999998	No	Yes	M	Unknown	No data	M5 loss		24	9	15	1R1_2R1_3R1_4R1_5_6_6BM4_7_8_9_10R1_11_11BM4_12_13_15_16R4_17R4_18R4_19_23_24_59R5_82R2	6	1	5	1R1-7-8|2R1-3R1-5-6-9-10R1-11-15-19|4R1-12-13|6BM4-11BM4-16R4-17R4-18R4|23-24|59R5-82R2	289807000	159900000	129907000	29993000	22
328	328T1	Unknown	'SDD000000200415	Matched	Clade_A2	Clade_A2-6	DFT1_6	DFT1_6A	3161G>A;7842C>T	Judbury	-42.987875000000003	146.927492	2015	20/04/2015	DFT1	Tissue	No	Yes	Yes	Facial/oral	left hand side of face			Multiple		0.81	Not Available	0.9	0.81	No	Yes	F	Unknown	No data (confirmed)			20	10	10	1R1_2R1_3R1_4R1_5_6_7_8_9_10R1_11_12_13_15_19_22_26_27R1_166_167	7	2	5	1R1-7-8|2R1-3R1-5-6-9-10R1-11-15-19|4R1-12-13|22|26-27R1|166|167	244600000	160900000	83700000	77200000	20
328	328T2	Unknown	'SDD000000200415	Matched	Clade_A2	Clade_A2-6	DFT1_6	DFT1_6A	3161G>A;7842C>T	Judbury	-42.987875000000003	146.927492	2015	20/04/2015	DFT1	Tissue	No	Yes	No (metastasis with matched primary)	Lung		Metastasis		Multiple		0.41	Not Available	0.48499999999999999	0.41	No	Yes	F	Unknown	No data (confirmed)			21	11	10	1R1_2R1_3R1_4R1_5_6_7_8_9_10R1_11_12_13_15_19_22_26_27R1_166_167_1808R1	8	3	5	1R1-7-8|2R1-3R1-5-6-9-10R1-11-15-19|4R1-12-13|22|26-27R1|166|167|1808R1	245400000	161700000	83700000	78000000	21
328	328T3	Unknown	'SDD000000200415	Matched	Clade_A2	Clade_A2-6	DFT1_6	DFT1_6A	3161G>A;7842C>T	Judbury	-42.987875000000003	146.927492	2015	20/04/2015	DFT1	Tissue	No	Yes	Yes	Shoulder (subcutaneous)		Metastasis		Multiple		0.878	Not Available	0.92800000000000005	0.878	No	Yes	F	Unknown	No data (confirmed)			21	10	11	1R1_2R1_3R1_4R1_5_6_7_8_9_10R1_11_12_13_15_19_22_26_27R1_166_167_1012	8	2	6	1R1-7-8|2R1-3R1-5-6-9-10R1-11-15-19|4R1-12-13|22|26-27R1|166|167|1012	245600000	160900000	84700000	76200000	21
329	329T1	Unknown	'SDD000000280315	Matched	Clade_A2	Clade_A2-2	DFT1_12	DFT1_12	8374G>A	Chauncy Vale	-42.587926000000003	147.276816	2015	28/03/2015	DFT1	Tissue	No	Yes	Yes	Facial/oral	Exterior lower right lip			Singleton		0.85699999999999998	Not Available	0.82899999999999996	0.85699999999999998	No	Yes	F	Unknown	No data (confirmed)	M5 loss		24	10	14	1R1_2R1_3R1_4R1_5_6_6BM8_7_8_9_10R1_11_11BM8_12_13_15_16R8_17R8_18R8_19_22_117_934_965	7	2	5	1R1-7-8|2R1-3R1-5-6-9-10R1-11-15-19|4R1-12-13|6BM8-11BM8-16R8-17R8-18R8-117|22|934|965	261607000	160600000	101007000	59593000	24
330	330T1	Unknown	'SDD000000030415	Matched	Clade_A2	Clade_A2-6	DFT1_6	DFT1_6B	3161G>A;10289A>G	Franklin	-43.084344999999999	146.98489799999999	2015	04/03/2015	DFT1	Tissue	No	Yes	Yes	Facial/oral	chin			Singleton		0.89100000000000001	Not Available	0.84099999999999997	0.89100000000000001	No	Yes	F	Unknown	No data (confirmed)			18	9	9	1R1_2R1_3R1_4R1_5_6_7_8_9_10R1_11_12_13_15_19_22_26_27R1	5	1	4	1R1-7-8|2R1-3R1-5-6-9-10R1-11-15-19|4R1-12-13|22|26-27R1	242100000	159900000	82200000	77700000	18
331	331T	'12/0625	Unknown	Unmatched	Clade_B	Clade_B-3	DFT1_7	DFT1_7A	2707G>A;8529G>A	Kempton	-42.525894000000001	147.20354900000001	2012	23/02/2012	DFT1	Cell-Line	No	Yes	Yes	Unknown				Singleton		0.97899999999999998	0.97199999999999998	0.98699999999999999	0.97550000000000003	Yes	Yes	M	3	Strain 2	M5 loss		40	19	21	1R1_2R1_2R1BM15_3R1_3R1BM15_4R1_5_5G2CN4_6_6BM20_7_8_9_9BM15_10R1_10R1BM15_11_11BM20_12_13_15_15BM15_16R20_17R20_18R20_19_20R1_34R15_35R15_36R15_37R15_38R15_39R15_47R1_51R3_57_58_407_408_1807	7	2	5	1R1-7-8|2R1-3R1-5-6-9-10R1-11-15-19|2R1BM15-3R1BM15-6BM20-9BM15-10R1BM15-11BM20-15BM15-16R20-17R20-18R20|4R1-12-13|5G2CN4-34R15-35R15-36R15-37R15-38R15-39R15-407-408-1807|20R1|47R1-51R3-57-58	614707000	350400000	264307000	86093000	24
332	332T	'12/3252	Unknown	Unmatched	Clade_B	Clade_B-2	DFT1_13	DFT1_13	10069A>G	Kempton	-42.525894000000001	147.20354900000001	2012	17/08/2012	DFT1	Cell-Line	No	Yes	Yes	Unknown				Singleton		0.98199999999999998	1.0309999999999999	0.97299999999999998	1.0065	Yes	Yes	F	4	Strain 2 evolved	M5 loss		33	16	17	1R1_2R1_2R1BM14_3R1_3R1BM14_4R1_5_6_6BM19_7_8_9_9BM14_10R1_10R1BM14_11_11BM19_12_13_15_15BM14_16R19_17R19_18R19_19_34R14_35R14_36R14_37R14_38R14_39R14_69R8_1842	5	2	3	1R1-7-8|2R1-3R1-5-6-9-10R1-11-15-19|2R1BM14-3R1BM14-6BM19-9BM14-10R1BM14-11BM19-15BM14-16R19-17R19-18R19-1842|4R1-12-13|34R14-35R14-36R14-37R14-38R14-39R14-69R8	464907000	252300000	212607000	39693000	25
333	333Ta	'12/4484	Unknown	Unmatched	Clade_B	Clade_B-3	DFT1_7	DFT1_7A1	2707G>A;8529G>A;9153T>C	Hamilton	-42.557899999999997	146.83376200000001	2012	15/11/2012	DFT1	Cell-Line	No	Yes	Yes	Unknown				Singleton		0.97799999999999998	1.077	0.98099999999999998	1.0275000000000001	No	Yes	F	1	Strain 2 evolved	M5 loss		34	12	22	1R1_2R1_2R1BM16_3R1_4R1_5_6_6BM21_7_8_9_10R1_11_11BM21_12_13_15_15BM16_16R21_19_20R1_37R16_47R1_51R3_57_58_120R16_203R1_840R3_911R2_1019R1_1020R1_1042R16_1831R2	7	2	5	1R1-7-8|2R1-3R1-5-6-9-10R1-11-15-19|2R1BM16-6BM21-11BM21-15BM16-16R21-203R1-840R3-911R2-1019R1-1020R1-1042R16|4R1-12-13|20R1|37R16-120R16-1831R2|47R1-51R3-57-58	1186394342	412600000	773794342	-361194342	22
334	334T1	Unknown	'982000361977435	Matched	Clade_A1	Clade_A1-3A1	DFT1_3	DFT1_3A1a	1828A>G;3255G>A;7033G>A;14130G>A	Kaoota	-43.028703	147.16278600000001	2015	29/03/2015	DFT1	Tissue	No	Yes	Yes	Neck				Multiple		0.69	Not Available	0.89300000000000002	0.69	No	Yes	F	3	No data			17	9	8	1R1_2R1_3R1_4R1_5_6_7_8_9_10R1_11_12_13_15_19_23_24	4	1	3	1R1-7-8|2R1-3R1-5-6-9-10R1-11-15-19|4R1-12-13|23-24	276200000	159900000	116300000	43600000	17
334	334T2	Unknown	'982000361977435	Matched	Clade_A1	Clade_A1-3A1	DFT1_3	DFT1_3A1	1828A>G;3255G>A;14130G>A	Kaoota	-43.028703	147.16278600000001	2015	29/03/2015	DFT1	Tissue	No	Yes	Yes	Facial/oral	Bottom left side of face			Multiple		0.73499999999999999	Not Available	0.83299999999999996	0.73499999999999999	No	Yes	F	3	No data			17	9	8	1R1_2R1_3R1_4R1_5_6_7_8_9_10R1_11_12_13_15_19_23_24	4	1	3	1R1-7-8|2R1-3R1-5-6-9-10R1-11-15-19|4R1-12-13|23-24	276200000	159900000	116300000	43600000	17
334	334T3	Unknown	'982000361977435	Matched	Clade_A1	Clade_A1-3A1	DFT1_3	DFT1_3A1	1828A>G;3255G>A;14130G>A	Kaoota	-43.028703	147.16278600000001	2015	29/03/2015	DFT1	Tissue	No	Yes	Yes	Facial/oral	Middle of left side of face			Multiple		0.82799999999999996	Not Available	0.85599999999999998	0.82799999999999996	No	Yes	F	3	No data			17	9	8	1R1_2R1_3R1_4R1_5_6_7_8_9_10R1_11_12_13_15_19_23_24	4	1	3	1R1-7-8|2R1-3R1-5-6-9-10R1-11-15-19|4R1-12-13|23-24	276200000	159900000	116300000	43600000	17
335	335T	Unknown	'982000356711103	Matched	Clade_A1	Clade_A1-3A1	DFT1_3	DFT1_3A1	1828A>G;3255G>A;14130G>A	Snug	-43.077604000000001	147.15378999999999	2015	25/03/2015	DFT1	Tissue	No	Yes	Yes	Facial/oral	Chin			Singleton		0.309	Not Available	0.36399999999999999	0.309	No	Yes	M	4	No data	M5 loss		22	9	13	1R1_2R1_3R1_4R1_5_6_6BM4_7_8_9_10R1_11_11BM4_12_13_15_16R4_17R4_18R4_19_23_24	5	1	4	1R1-7-8|2R1-3R1-5-6-9-10R1-11-15-19|4R1-12-13|6BM4-11BM4-16R4-17R4-18R4|23-24	284407000	159900000	124507000	35393000	22
336	336T	Unknown	'982009104799360	Matched	Clade_A1	Clade_A1-3A1	DFT1_3	DFT1_3A1	1828A>G;3255G>A;14130G>A	Pelverata	-43.077604000000001	147.15378999999999	2015	30/03/2015	DFT1	Tissue	No	Yes	Yes	Facial/oral	Front lower lip			Singleton		0.32800000000000001	Not Available	0.623	0.32800000000000001	No	Yes	F	2	No data	M5 loss		22	9	13	1R1_2R1_3R1_4R1_5_6_6BM4_7_8_9_10R1_11_11BM4_12_13_15_16R4_17R4_18R4_19_23_24	5	1	4	1R1-7-8|2R1-3R1-5-6-9-10R1-11-15-19|4R1-12-13|6BM4-11BM4-16R4-17R4-18R4|23-24	284407000	159900000	124507000	35393000	22
338	338T	Unknown	'982000356669303	Matched (MIPs Only)	DFT2	DFT2	DFT2_0	DFT2_0	Novariants	Snug	-43.077604000000001	147.15378999999999	2015	26/03/2015	DFT2	Cell-Line	No	No (not DFT1)	No (not DFT1)	Facial/oral	Back right upper lip			Multiple	Duplicate cell pellet	0.997	Not Available	Not Available	0.997	No	Yes	M	2	No data			27	10	17	1R2_42R4_971_1753_1754_1755_1761_1761G1CN4_1775_1776R1_1780_1781_1782R2_1783_1784_1787_1788_1789_1790_1791_1792_1792L1CN0_1793_1794_1795_1797_1801R2	3	2	1	1R2-42R4-971-1775-1776R1-1781-1782R2-1783-1784-1787-1791-1792-1792L1CN0-1793-1794-1795-1797|1753-1761-1761G1CN4-1780-1788-1789-1790-1801R2|1754-1755	222700000	105300000	117400000	-12100000	27
338	338Ta	Unknown	'982000356669303	Matched (MIPs Only)	DFT2	DFT2	DFT2_0	DFT2_0	Novariants	Snug	-43.077604000000001	147.15378999999999	2015	26/03/2015	DFT2	Cell-Line	No	No (not DFT1)	No (not DFT1)	Facial/oral	Back right upper lip			Multiple		0.99199999999999999	Not Available	Not Available	0.99199999999999999	No	Yes	M	2	No data			27	10	17	1R2_42R4_971_1753_1754_1755_1761_1761G1CN4_1775_1776R1_1780_1781_1782R2_1783_1784_1787_1788_1789_1790_1791_1792_1792L1CN0_1793_1794_1795_1797_1801R2	3	2	1	1R2-42R4-971-1775-1776R1-1781-1782R2-1783-1784-1787-1791-1792-1792L1CN0-1793-1794-1795-1797|1753-1761-1761G1CN4-1780-1788-1789-1790-1801R2|1754-1755	222700000	105300000	117400000	-12100000	27
339	339T	Unknown	'982000167763080	Matched (MIPs Only)	DFT2	DFT2	DFT2_0	DFT2_0	Novariants	Nicholls Rivulet	-43.077604000000001	147.15378999999999	2015	27/03/2015	DFT2	Cell-Line	No	No (not DFT1)	No (not DFT1)	Facial/oral	Upper right gum			Multiple	Duplicate cell pellet	0.98599999999999999	Not Available	Not Available	0.98599999999999999	No	Yes	M	3	No data			26	8	18	1R2_42R4_971_1611_1753_1761_1761G1CN4_1775_1776R1_1780_1781_1782R2_1783_1784_1787_1788_1789_1790_1791_1792_1792L1CN0_1793_1794_1795_1797_1801R2	3	1	2	1R2-42R4-971-1775-1776R1-1781-1782R2-1783-1784-1787-1791-1792-1792L1CN0-1793-1794-1795-1797|1611|1753-1761-1761G1CN4-1780-1788-1789-1790-1801R2	195700000	77200000	118500000	-41300000	26
339	339Ta	Unknown	'982000167763080	Matched (MIPs Only)	DFT2	DFT2	DFT2_0	DFT2_0	Novariants	Nicholls Rivulet	-43.077604000000001	147.15378999999999	2015	27/03/2015	DFT2	Cell-Line	No	No (not DFT1)	No (not DFT1)	Facial/oral	Upper right gum			Multiple		0.98699999999999999	Not Available	Not Available	0.98699999999999999	No	Yes	M	3	No data			26	8	18	1R2_42R4_971_1611_1753_1761_1761G1CN4_1775_1776R1_1780_1781_1782R2_1783_1784_1787_1788_1789_1790_1791_1792_1792L1CN0_1793_1794_1795_1797_1801R2	3	1	2	1R2-42R4-971-1775-1776R1-1781-1782R2-1783-1784-1787-1791-1792-1792L1CN0-1793-1794-1795-1797|1611|1753-1761-1761G1CN4-1780-1788-1789-1790-1801R2	195700000	77200000	118500000	-41300000	26
340	340T	Unknown	'982009104723843	Matched	Non-DFTD	Non-DFTD	Non-DFTD	Non-DFTD	-	Cressy (captive)	-	-	2015	04/06/2015	Non-DFTD	Tissue	No	No (not DFT1)	No (not DFT1)	Anal sac			Carcinoma (anal sac squamous cell)	Singleton		Not Available	Not Available	Not Available	N/A	No	Yes	M	Unknown	Non-DFTD			184	178	6	2R2_10R2_116R2_428R2_607R1_1029R3_1045_1284_1285_1286_1287_1287G1CN4_1287G1CN5_1288_1288G1CN4_1289_1290_1290G1CN4_1291_1291G1CN4_1292_1292G1CN4_1293_1293G1CN4_1294_1295_1295G1CN4_1295G2CN5_1296_1296G1CN4_1297_1297G1CN4_1298_1298G1CN4_1298G1CN5_1298G1CN6_1298G1CN7_1298G1CN8_1298G1CN9_1298G1CN10_1298G1CN11_1298G1CN12_1299_1300_1300G1CN3.5_1301_1301G1CN4_1301G1CN5_1301G1CN6_1301G1CN7_1301G1CN8_1302_…	2	1	1	2R2-10R2-116R2-428R2-607R1-1029R3-1284-1286-1287-1287G1CN4-1287G1CN5-1288-1288G1CN4-1289-1290-1290G1CN4-1291-1291G1CN4-1292-1292G1CN4-1293-1293G1CN4-1294-1295-1295G1CN4-1295G2CN5-1296-1296G1CN4-1297-1297G1CN4-1298-1298G1CN4-1298G1CN5-1298G1CN6-1298G1CN7-1298G1CN8-1298G1CN9-1298G1CN10-1298G1CN11-1298G1CN12-1299-1300-1300G1CN3.5-1301-1301G1CN4-1301G1CN5-1301G1CN6-1301G1CN7-1301G1CN8-1302-1302G1CN4-…	1035599999	991300000	44299999	947000001	161
341	341T	Unknown	'982000191010174	Matched	Clade_B	Clade_B-3	DFT1_7	DFT1_7A	2707G>A;8529G>A	Brighton	-42.719988000000001	147.26800700000001	2015	17/05/2015	DFT1	Tissue	No	Yes	Yes	Unknown				Singleton		0.75	Not Available	0.86699999999999999	0.75	No	Yes	Intersex	Unknown	No data (confirmed)			22	11	11	1R1_2R1_3R1_4R1_5_6_7_8_9_10R1_11_12_13_15_19_20R1_47R1_51R3_57_58_924_926	6	2	4	1R1-7-8|2R1-3R1-5-6-9-10R1-11-15-19|4R1-12-13|20R1|47R1-51R3-57-58|924-926	274400000	170800000	103600000	67200000	22
342	342T1	'10/2142	'00065DC74E	Matched	Clade_B	Clade_B-9	DFT1_2	DFT1_2	14114C>T	Mole Creek (captive)	-41.552312999999998	146.45533829999999	2010	07/07/2010	DFT1	Tissue	No	Yes	Yes	Unknown				Singleton		0.82799999999999996	0.80900000000000005	0.83099999999999996	0.81850000000000001	Yes	Yes	F	5	No data (confirmed)			18	9	9	1R1_2R1_3R1_4R1_5_6_7_8_9_10R1_11_12_13_15_19_20R1_21R1_25	6	1	5	1R1-7-8|2R1-3R1-5-6-9-10R1-11-15-19|4R1-12-13|20R1|21R1|25	225000000	159900000	65100000	94800000	18
343	343T1	'10/2301	'982009106486809	Matched	Clade_A1	Clade_A1-3A2	DFT1_3	DFT1_3A2a1	1828A>G;2731A>G;3255G>A;3430T>A;4311G>A	Forestier	-42.902220999999997	147.83382900000001	2010	26/07/2010	DFT1	Tissue	No	Yes	Yes	Unknown				Singleton		0.24299999999999999	0.23899999999999999	0.80500000000000005	0.24099999999999999	Yes	No	F	1	Strain 3	No data
344	344T1	'10/2558	'982009104866449	Matched	Clade_A1	Clade_A1-3A2	DFT1_3	DFT1_3A2a1	1828A>G;2731A>G;3255G>A;3430T>A;4311G>A	Forestier	-42.902220999999997	147.83382900000001	2010	15/08/2010	DFT1	Tissue	No	Yes	Yes	Unknown				Singleton		0.82299999999999995	0.83099999999999996	0.84599999999999997	0.82699999999999996	Yes	Yes	F	2	No data (confirmed)			18	10	8	1R1_2R1_3R1_4R1_5_6_7_8_9_10R1_11_12_13_15_19_23_24_135	5	2	3	1R1-7-8|2R1-3R1-5-6-9-10R1-11-15-19|4R1-12-13|23-24|135	277400000	161100000	116300000	44800000	18
345	345T1	'10/2619	'982009104907551	Matched	Clade_A1	Clade_A1-3A2	DFT1_3	DFT1_3A2a1	1828A>G;2731A>G;3255G>A;3430T>A;4311G>A	Forestier	-42.902220999999997	147.83382900000001	2010	17/08/2010	DFT1	Tissue	No	Yes	Yes	Unknown				Singleton		0.81799999999999995	0.82699999999999996	0.877	0.82250000000000001	Yes	Yes	M	2	No data (confirmed)			18	10	8	1R1_2R1_3R1_4R1_5_6_7_8_9_10R1_11_12_13_15_19_23_24_135	5	2	3	1R1-7-8|2R1-3R1-5-6-9-10R1-11-15-19|4R1-12-13|23-24|135	277400000	161100000	116300000	44800000	18
346	346T1	'10/3379	'982009104720533	Matched	Clade_A1	Clade_A1-3A2	DFT1_3	DFT1_3A2a1	1828A>G;2731A>G;3255G>A;3430T>A;4311G>A	Forestier	-42.902220999999997	147.83382900000001	2010	15/10/2010	DFT1	Tissue	No	Yes	Yes	Unknown				Singleton		0.79300000000000004	0.83299999999999996	0.76400000000000001	0.81299999999999994	Yes	Yes	M	2	No data (confirmed)			19	10	9	1R1_2R1_3R1_4R1_5_6_7_8_9_10R1_11_12_13_15_19_23_24_135_300	6	2	4	1R1-7-8|2R1-3R1-5-6-9-10R1-11-15-19|4R1-12-13|23-24|135|300	305000000	161100000	143900000	17200000	19
347	347T1	'10/3381	9850016002623 (incomplete)	Matched	Clade_A1	Clade_A1-3A2	DFT1_3	DFT1_3A2a	1828A>G;3255G>A;3430T>A;4311G>A	Forestier	-42.902220999999997	147.83382900000001	2010	15/10/2010	DFT1	Tissue	No	Yes	Yes	Unknown				Singleton		0.84699999999999998	0.85299999999999998	0.88200000000000001	0.85	Yes	Yes	F	6	No data (confirmed)			17	9	8	1R1_2R1_3R1_4R1_5_6_7_8_9_10R1_11_12_13_15_19_23_24	4	1	3	1R1-7-8|2R1-3R1-5-6-9-10R1-11-15-19|4R1-12-13|23-24	276200000	159900000	116300000	43600000	17
348	348T1	'10/3568	'982009106481563	Matched	Clade_B	Clade_B-10	DFT1_2	DFT1_2	14114C>T	Natone	-41.168664	145.92752899999999	2010	02/11/2010	DFT1	Tissue	No	Yes	Yes	Unknown				Singleton		0.88800000000000001	0.878	0.91500000000000004	0.88300000000000001	Yes	Yes	M	4	Strain 2			18	9	9	1R1_2R1_3R1_4R1_5_6_7_8_9_10R1_11_12_13_15_19_20R1_21R1_25	6	1	5	1R1-7-8|2R1-3R1-5-6-9-10R1-11-15-19|4R1-12-13|20R1|21R1|25	225000000	159900000	65100000	94800000	18
349	349T1	'10/3610	'00068352D8	Matched	Non-DFTD	Non-DFTD	Non-DFTD	Non-DFTD	-	Mole Creek (captive)	-41.552312999999998	146.45533829999999	2010	04/11/2010	Non-DFTD	Tissue	No	No (not DFT1)	No (not DFT1)	Skin	Cloaca		Round cell tumour (cutaneous)	Singleton		Not Available	Not Available	Not Available	N/A	No	Yes	F	5	Non-DFTD			6	0	6	170R2_1356_1357_1358_1359_1409R1	1	0	1	170R2-1356-1357-1358-1359-1409R1	77700000	0	77700000	-77700000	2
350	350T1	'10/3612	'982009106165359	Matched (MIPs Only)	Clade_A1	Clade_A1-3A2	DFT1_3	DFT1_3A2a1	1828A>G;2731A>G;3255G>A;3430T>A;4311G>A	Forestier	-42.902220999999997	147.83382900000001	2010	03/11/2010	DFT1	Tissue	No	Yes	Yes	Unknown				Singleton		0.61899999999999999	0.65700000000000003	0.65100000000000002	0.63800000000000001	Yes	Yes	M	1	No data (confirmed)			18	9	9	1R1_2R1_3R1_4R1_5_6_7_8_9_10R1_11_12_13_15_19_23_24_458	5	1	4	1R1-7-8|2R1-3R1-5-6-9-10R1-11-15-19|4R1-12-13|23-24|458	277200000	159900000	117300000	42600000	18
351	351T1	'10/3957	'982009106037893	Matched	Clade_B	Clade_B-10	DFT1_2	DFT1_2	14114C>T	Waratah	-41.447800999999998	145.52639500000001	2010	26/11/2010	DFT1	Tissue	No	Yes	Yes	Unknown				Singleton		0.66600000000000004	0.70299999999999996	0.87	0.6845	Yes	Yes	M	4	Strain 2			18	9	9	1R1_2R1_3R1_4R1_5_6_7_8_9_10R1_11_12_13_15_19_20R1_21R1_25	6	1	5	1R1-7-8|2R1-3R1-5-6-9-10R1-11-15-19|4R1-12-13|20R1|21R1|25	225000000	159900000	65100000	94800000	18
352	352T1	'10/4001	'982009106314654	Matched	Non-DFTD	Non-DFTD	Non-DFTD	Non-DFTD	-	Taranna (captive)	-43.065832	147.86815799999999	2010	01/12/2010	Non-DFTD	Tissue	No	No (not DFT1)	No (not DFT1)	Cuteanous lymphoma			Lymphoma (cutaneous)	Singleton		Not Available	Not Available	Not Available	N/A	No	Yes	M	8	Non-DFTD			8	0	8	4R3_426R2_1361_1362_1364_1724R3_1367_1403R1	1	0	1	4R3-426R2-1361-1362-1364-1367-1403R1-1724R3	101600000	0	101600000	-101600000	8
353	353T1	'11/1625	Unknown	Matched	Clade_B	Clade_B-3	DFT1_0	DFT1_0	Novariants	Richmond	-42.728265999999998	147.42703	2011	29/04/2011	DFT1	Tissue	No	Yes	Yes	Unknown				Singleton		0.77400000000000002	0.77	Not Available	0.77200000000000002	Yes	Yes	F	3	No data (confirmed)			18	10	8	1R1_2R1_3R1_4R1_5_6_7_8_9_10R1_11_12_13_15_19_20R1_509_1843	6	2	4	1R1-7-8|2R1-3R1-5-6-9-10R1-11-15-19|4R1-12-13|20R1|509|1843	213800000	160800000	53000000	107800000	18
354	354T1	'11/1626	Unknown	Matched	Clade_A2	Clade_A2-6	DFT1_6	DFT1_6	3161G>A	Glen Huon	-43.027470999999998	146.94150300000001	2011	29/04/2011	DFT1	Tissue	No	Yes	Yes	Unknown				Singleton		0.89500000000000002	0.88100000000000001	0.63400000000000001	0.88800000000000001	Yes	Yes	M	2	Strain 2 and tetraploid Strain 2			21	10	11	1R1_2R1_3R1_4R1_5_6_7_8_9_10R1_11_12_13_15_19_22_26_27R1_166_167_942R2	8	2	6	1R1-7-8|2R1-3R1-5-6-9-10R1-11-15-19|4R1-12-13|22|26-27R1|166|167|942R2	245400000	160900000	84500000	76400000	21
356	356T1	'11/3133	'9653000124785C	Matched	Clade_C	Clade_C-2	DFT1_15	DFT1_15A	2170G>A;13295G>A	Forth	-41.199835999999998	146.23489599999999	2011	17/08/2011	DFT1	Tissue	No	Yes	Yes	Unknown				Singleton		0.84899999999999998	0.83899999999999997	0.80100000000000005	0.84399999999999997	Yes	Yes	F	4	Strain 2			17	10	7	1R1_2R1_3R1_4R1_5_6_7_8_9_10R1_11_12_13_15_19_344_593	5	2	3	1R1-7-8|2R1-3R1-5-6-9-10R1-11-15-19|4R1-12-13|344|593	270600000	200900000	69700000	131200000	17
357	357T1	'11/3366	'982009106364381	Matched	Clade_A1	Clade_A1-3A2	DFT1_3	DFT1_3A2a2	1828A>G;3255G>A;3430T>A;4311G>A;5836G>A	Forestier	-42.902220999999997	147.83382900000001	2011	02/09/2011	DFT1	Tissue	No	Yes	Yes	Unknown				Singleton		0.79800000000000004	0.84199999999999997	0.86199999999999999	0.82	Yes	Yes	F	2	Strain 3			22	12	10	1R1_2R1_3R1_4R1_5_6_7_8_9_10R1_11_12_13_15_19_23_24_54R4_78R2_129R2_442_443	6	2	4	1R1-7-8|2R1-3R1-5-6-9-10R1-11-15-19|4R1-12-13|23-24|54R4-78R2-129R2|442-443	296600000	168900000	127700000	41200000	17
358	358T2	Unknown	'982009106218282	Matched	Clade_A1	Clade_A1-1	DFT1_0	DFT1_0	Novariants	Freycinet	-42.194752999999999	148.30324300000001	2011	23/08/2011	DFT1	Tissue	No	Yes	Yes	Unknown				Multiple		0.51900000000000002	Not Available	Not Available	0.51900000000000002	No	Yes	F	2	Strain 4			35	28	7	1R1_2R1_3R1_4R1_5_6_7_8_9_10R1_11_12_13_15_19_48R1_55R1_56R1_63_63G1CN4_63G1CN5_63G1CN6_63G1CN7_64_64G1CN4_64G1CN5_64G1CN6_64G1CN7_65_65G1CN4_65G1CN5_65G1CN6_65G1CN7_66_70	7	4	3	1R1-7-8|2R1-3R1-5-6-9-10R1-11-15-19|4R1-12-13|48R1-55R1-56R1-63-63G1CN4-64-64G1CN4-65-65G1CN4-66|63G1CN5-63G1CN6-64G1CN5-64G1CN6-65G1CN5-65G1CN6|63G1CN7-64G1CN7-65G1CN7|70	287100000	235200000	51900000	183300000	35
358	358T3	Unknown	'982009106218282	Matched	Clade_A1	Clade_A1-1	DFT1_0	DFT1_0	Novariants	Freycinet	-42.194752999999999	148.30324300000001	2011	31/10/2011	DFT1	Tissue	No	Yes	Yes	Unknown				Multiple		0.93899999999999995	0.94799999999999995	Not Available	0.94350000000000001	Yes	Yes	F	2	Strain 4			35	28	7	1R1_2R1_3R1_4R1_5_6_7_8_9_10R1_11_12_13_15_19_48R1_55R1_56R1_63_63G1CN4_63G1CN5_63G1CN6_63G1CN7_64_64G1CN4_64G1CN5_64G1CN6_64G1CN7_65_65G1CN4_65G1CN5_65G1CN6_65G1CN7_66_70	7	4	3	1R1-7-8|2R1-3R1-5-6-9-10R1-11-15-19|4R1-12-13|48R1-55R1-56R1-63-63G1CN4-64-64G1CN4-65-65G1CN4-66|63G1CN5-63G1CN6-64G1CN5-64G1CN6-65G1CN5-65G1CN6|63G1CN7-64G1CN7-65G1CN7|70	287100000	235200000	51900000	183300000	35
358	358T3.1	Unknown	'982009106218282	Matched	Clade_A1	Clade_A1-1	DFT1_0	DFT1_0	Novariants	Freycinet	-42.194752999999999	148.30324300000001	2011	23/08/2011	DFT1	Tissue	No	No (duplicate)	No (duplicate)	Unknown				Multiple	Duplicate DNA extraction from same tumour	0.86699999999999999	0.91700000000000004	Not Available	0.89200000000000002	Yes	Yes	F	2	Strain 4			36	28	8	1R1_2R1_3R1_4R1_5_6_7_8_9_10R1_11_12_13_15_19_48R1_55R1_56R1_63_63G1CN4_63G1CN5_63G1CN6_63G1CN7_64_64G1CN4_64G1CN5_64G1CN6_64G1CN7_65_65G1CN4_65G1CN5_65G1CN6_65G1CN7_66_70_867	8	4	4	1R1-7-8|2R1-3R1-5-6-9-10R1-11-15-19|4R1-12-13|48R1-55R1-56R1-63-63G1CN4-64-64G1CN4-65-65G1CN4-66|63G1CN5-63G1CN6-64G1CN5-64G1CN6-65G1CN5-65G1CN6|63G1CN7-64G1CN7-65G1CN7|70|867	288100000	235200000	52900000	182300000	36
359	359T1	'11/4290	'985120016024404	Matched	Non-DFTD	Non-DFTD	Non-DFTD	Non-DFTD	-	Badger Island	-	-	2011	08/11/2011	Non-DFTD	Tissue	No	No (not DFT1)	No (not DFT1)	Unknown			Lymphoma (cutaneous)	Singleton		Not Available	Not Available	Not Available	N/A	No	Yes	F	8	Non-DFTD			22	5	17	27R3_53R3_61R2_291R2_1368_1369_1370_1376_1378_1379_1380_1381_1382_1383_1384_1385_1386_1387_1403R2_1722R1_1782R1_1844	2	1	1	27R3-53R3-61R2-291R2-1368-1369-1370-1376-1378-1379-1380-1382-1384-1403R2-1722R1-1782R1-1844|1381-1383-1385-1386-1387	150600000	28500000	122100000	-93600000	18
360	360T1	'11/4493	'982000123128375	Matched (MIPs Only)	Clade_C	Clade_C-2	DFT1_0	DFT1_0	Novariants	Waratah	-41.447800999999998	145.52639500000001	2011	19/11/2011	DFT1	Tissue	No	Yes	Yes	Unknown				Singleton		0.85299999999999998	0.91800000000000004	Not Available	0.88549999999999995	Yes	Yes	M	2	Strain 2	M5 loss		22	9	13	1R1_2R1_3R1_4R1_5_6_6BM39_7_8_9_10R1_11_11BM39_12_13_15_16R39_17R39_18R39_19_233_341	5	1	4	1R1-7-8|2R1-3R1-5-6-9-10R1-11-15-19|4R1-12-13|6BM39-11BM39-16R39-17R39-18R39|233-341	221207000	159900000	61307000	98593000	22
361	361T2	'11/4621	'982009104829917	Matched	Clade_C	Clade_C-3	DFT1_5	DFT1_5	2681C>T	Zeehan	-41.889761999999997	145.34562700000001	2011	30/11/2011	DFT1	Tissue	No	Yes	Yes	Unknown				Singleton		0.92500000000000004	0.94199999999999995	0.93899999999999995	0.9335	Yes	Yes	M	4	Strain 2			16	9	7	1R1_2R1_3R1_4R1_5_6_7_8_9_10R1_11_12_13_15_19_62	4	1	3	1R1-7-8|2R1-3R1-5-6-9-10R1-11-15-19|4R1-12-13|62	211600000	159900000	51700000	108200000	16
363	363T1	'12/0621	'0006832F71	Matched	Clade_A1	Clade_A1-3A3	DFT1_3	DFT1_3A3a	1828A>G;2572G>A;3255G>A;16137G>A	Hobart (captive)	-	-	2012	23/02/2012	DFT1	Experimental transmission (cell-line)	Experimental transmission (cell-line; inoculation date: unknown)	Yes	No (experimental transmission)	Unknown				Singleton		0.92600000000000005	0.92500000000000004	0.95699999999999996	0.92549999999999999	Yes	Yes	M	8	Strain 3 evolved	M5 loss		51	31	20	1R1_2R1_2R1BM4_3R1_3R1BM4_4R1_5_6_6BM6_7_8_9_9BM4_10R1_10R1BM4_11_11BM6_12_13_15_15BM4_16R6_17R6_18R6_19_23_24_33_34R4_35R4_36R4_37R4_38R4_39R4_40R2_40R2G1CN4_43R2_48R2_48R2G1CN4_49R2_49R2G1CN4_54R1_54R1G1CN4_73R1_73R1G1CN4_78R1_78R1G1CN4_84_85_85G1CN4_294R1	10	3	7	1R1-7-8|2R1-3R1-5-6-9-10R1-11-15-19|2R1BM4-3R1BM4-9BM4-10R1BM4-15BM4|4R1-12-13|6BM6-11BM6-16R6-17R6-18R6|23-24|33|34R4-35R4-36R4-37R4-38R4-39R4|40R2-40R2G1CN4-43R2-48R2-48R2G1CN4-49R2-49R2G1CN4-54R1-54R1G1CN4-73R1-73R1G1CN4-78R1-78R1G1CN4-84-85-85G1CN4|294R1	635548000	332141000	303407000	28734000	40
364	364T1	'12/0652	'982000123210100	Matched	Clade_B	Clade_B-5	DFT1_0	DFT1_0	Novariants	Kempton	-42.525894000000001	147.20354900000001	2012	24/02/2012	DFT1	Tissue	No	Yes	Yes	Unknown				Singleton		0.82199999999999995	0.79100000000000004	Not Available	0.80649999999999999	Yes	Yes	F	2	Strain 2			19	9	10	1R1_2R1_3R1_4R1_5_6_7_8_9_10R1_11_12_13_15_19_20R1_21R1_25_175R3	7	1	6	1R1-7-8|2R1-3R1-5-6-9-10R1-11-15-19|4R1-12-13|20R1|21R1|25|175R3	225800000	159900000	65900000	94000000	19
365	365T2	'12/0820	'982009104719592	Matched	Clade_C	Clade_C-2	DFT1_0	DFT1_0	Novariants	West Pencil Pine	-41.717464999999997	145.85587000000001	2012	01/03/2012	DFT1	Tissue	No	Yes	Yes	Unknown				Singleton		0.91	0.94199999999999995	Not Available	0.92600000000000005	Yes	Yes	F	4	Strain 1	M5 loss		28	14	14	1R1_2R1_3R1_4R1_5_6_6BM30_7_8_9_10R1_11_11BM30_12_13_15_16R30_17R30_18R30_19_54R2_67R1_73R2_101R1_129R1_130_816_1032R1	6	2	4	1R1-7-8|2R1-3R1-5-6-9-10R1-11-15-19|4R1-12-13|6BM30-11BM30-16R30-17R30-18R30|54R2-73R2-101R1-129R1-130|67R1-816-1032R1	264548000	174400000	90148000	84252000	28
366	366T1	'03/2314	Unknown	Matched	Clade_C	Clade_C-2	DFT1_0	DFT1_0	Novariants	Kentish	-41.396065	146.25881000000001	2003	20/10/2003	DFT1	Tissue	No	Yes	Yes	Unknown				Singleton		0.91800000000000004	0.93500000000000005	Not Available	0.92649999999999999	Yes	Yes	M	Unknown	No data (confirmed)			15	9	6	1R1_2R1_3R1_4R1_5_6_7_8_9_10R1_11_12_13_15_19	3	1	2	1R1-7-8|2R1-3R1-5-6-9-10R1-11-15-19|4R1-12-13	211000000	159900000	51100000	108800000	15
367	367T1	'03/2326	Unknown	Unmatched	Clade_A2	Clade_A2-3	DFT1_0	DFT1_0	Novariants	Ringarooma	-41.254497999999998	147.73432299999999	2003	21/10/2003	DFT1	Tissue	No	Yes	Yes	Unknown				Singleton		0.89900000000000002	Not Available	Not Available	0.89900000000000002	No	Yes	Unknown	Unknown	No data	M5 loss		26	11	15	1R1_2R1_3R1_4R1_5_6_6BM10_7_8_9_10R1_11_11BM10_12_13_15_16R10_17R10_18R10_19_22_26_27R1_891_892_981	7	2	5	1R1-7-8|2R1-3R1-5-6-9-10R1-11-15-19|4R1-12-13|6BM10-11BM10-16R10-17R10-18R10-981|22|26-27R1|891-892	259007000	164800000	94207000	70593000	26
368	368T1	'03/2732	Unknown	Unmatched	Clade_A1	Clade_A1-3A6	DFT1_3	DFT1_3A6	1828A>G;3255G>A;12242T>C	Forestier	-42.902220999999997	147.83382900000001	2003	05/12/2003	DFT1	Tissue	No	Yes	Yes	Unknown				Singleton		0.89600000000000002	0.91300000000000003	0.92	0.90449999999999997	Yes	Yes	M	2	No data (confirmed)			17	9	8	1R1_2R1_3R1_4R1_5_6_7_8_9_10R1_11_12_13_15_19_23_24	4	1	3	1R1-7-8|2R1-3R1-5-6-9-10R1-11-15-19|4R1-12-13|23-24	276200000	159900000	116300000	43600000	17
370	370T1	'03/2766	Unknown	Matched	Clade_A2	Clade_A2-9	DFT1_0	DFT1_0	Novariants	Epping Forest	-41.758457999999997	147.304114	2003	11/12/2003	DFT1	Tissue	No	Yes	Yes	Unknown				Singleton		0.91300000000000003	0.92300000000000004	Not Available	0.91800000000000004	Yes	Yes	F	3	No data (confirmed)	M5 loss		23	9	14	1R1_2R1_3R1_4R1_5_6_6BM17_7_8_9_10R1_11_11BM17_12_13_15_16R17_17R17_18R17_19_22_26_27R1	6	1	5	1R1-7-8|2R1-3R1-5-6-9-10R1-11-15-19|4R1-12-13|6BM17-11BM17-16R17-17R17-18R17|22|26-27R1	250307000	159900000	90407000	69493000	23
371	371T1	'03/2837	Unknown	Unmatched	Clade_A2	Clade_A2-1	DFT1_0	DFT1_0	Novariants	Bronte Park	-42.124875000000003	146.46679	2003	19/12/2003	DFT1	Tissue	No	Yes	Yes	Unknown				Singleton		0.89200000000000002	0.89800000000000002	Not Available	0.89500000000000002	Yes	Yes	M	4	No data (confirmed)	M5 loss		23	9	14	1R1_2R1_3R1_4R1_5_6_6BM7_7_8_9_10R1_11_11BM7_12_13_15_16R7_17R7_18R7_19_21R3_88_95	5	1	4	1R1-7-8|2R1-3R1-5-6-9-10R1-11-15-19|4R1-12-13|6BM7-11BM7-16R7-17R7-18R7-88-95|21R3	233507000	159900000	73607000	86293000	23
372	372T1	'03/2839	Unknown	Matched	Clade_A2	Clade_A2-1	DFT1_0	DFT1_0	Novariants	Bronte Park	-42.124875000000003	146.46679	2003	19/12/2003	DFT1	Tissue	No	Yes	Yes	Unknown				Singleton		0.89300000000000002	0.94099999999999995	Not Available	0.91700000000000004	Yes	Yes	M	5	No data (confirmed)	M5 loss		23	9	14	1R1_2R1_3R1_4R1_5_6_6BM7_7_8_9_10R1_11_11BM7_12_13_15_16R7_17R7_18R7_19_21R3_88_95	5	1	4	1R1-7-8|2R1-3R1-5-6-9-10R1-11-15-19|4R1-12-13|6BM7-11BM7-16R7-17R7-18R7-88-95|21R3	233507000	159900000	73607000	86293000	22
374	374T1	'04/0607	Unknown	Unmatched	Clade_A2	Clade_A2-1	DFT1_0	DFT1_0	Novariants	Bronte Park	-42.124875000000003	146.46679	2004	11/03/2004	DFT1	Tissue	No	Yes	Yes	Unknown				Singleton		0.85599999999999998	0.89700000000000002	Not Available	0.87649999999999995	No	Yes	F	2	Strain 1	M5 loss		22	9	13	1R1_2R1_3R1_4R1_5_6_6BM7_7_8_9_10R1_11_11BM7_12_13_15_16R7_17R7_18R7_19_88_95	4	1	3	1R1-7-8|2R1-3R1-5-6-9-10R1-11-15-19|4R1-12-13|6BM7-11BM7-16R7-17R7-18R7-88-95	221007000	159900000	61107000	98793000	22
375	375T2	'04/0720	'982009101473700	Unmatched	Clade_A2	Clade_A2-1	DFT1_0	DFT1_0	Novariants	Bronte Park	-42.124875000000003	146.46679	2004	23/03/2004	DFT1	Tissue	No	Yes	Yes	Unknown				Singleton		0.93799999999999994	0.93100000000000005	Not Available	0.9345	Yes	Yes	M	3	No data (confirmed)	M5 loss		22	9	13	1R1_2R1_3R1_4R1_5_6_6BM7_7_8_9_10R1_11_11BM7_12_13_15_16R7_17R7_18R7_19_88_95	4	1	3	1R1-7-8|2R1-3R1-5-6-9-10R1-11-15-19|4R1-12-13|6BM7-11BM7-16R7-17R7-18R7-88-95	221007000	159900000	61107000	98793000	22
376	376T1	'04/1011	Unknown	Unmatched	Non-DFTD	Non-DFTD	Non-DFTD	Non-DFTD	-	Narawntapu	-41.139961999999997	146.64416399999999	2004	29/04/2004	Non-DFTD	Tissue	No	No (not DFT1)	No (not DFT1)	Unknown			Sarcoma (liver fibrosarcoma)	Singleton		Not Available	Not Available	Not Available	N/A	No	Yes	M	6	No data (confirmed)			2	0	2	1388_1845	1	0	1	1388-1845	10800000	0	10800000	-10800000
377	377T1	'04/2255	Unknown	Matched	Clade_E	Clade_E	DFT1_0	DFT1_0	Novariants	Epping Forest	-41.758457999999997	147.304114	2004	27/08/2004	DFT1	Tissue	No	Yes	Yes	Facial/oral	left side of face			Singleton		0.77	0.77400000000000002	Not Available	0.77200000000000002	Yes	Yes	F	3	DFTD evolved			13	9	4	1R1_2R1_3R1_5_6_7_8_9_10R1_11_15_19_363	3	1	2	1R1-7-8|2R1-3R1-5-6-9-10R1-11-15-19|363	188000000	159900000	28100000	131800000	13
378	378T1	'04/2330	Unknown	Matched	Clade_A2	Clade_A2-9	DFT1_0	DFT1_0	Novariants	Epping Forest	-41.758457999999997	147.304114	2004	06/09/2004	DFT1	Tissue	No	Yes	Yes	Unknown				Singleton		0.90800000000000003	0.91	Not Available	0.90900000000000003	Yes	Yes	F	3	No data (confirmed)	M5 loss		23	9	14	1R1_2R1_3R1_4R1_5_6_6BM17_7_8_9_10R1_11_11BM17_12_13_15_16R17_17R17_18R17_19_22_26_27R1	6	1	5	1R1-7-8|2R1-3R1-5-6-9-10R1-11-15-19|4R1-12-13|6BM17-11BM17-16R17-17R17-18R17|22|26-27R1	250307000	159900000	90407000	69493000	23
379	379T1	'05/3115	Unknown	Matched	Clade_A2	Clade_A2-6	DFT1_6	DFT1_6	3161G>A	New Norfolk	-42.775790999999998	147.06791200000001	2005	12/12/2005	DFT1	Tissue	No	Yes	Yes	Unknown				Singleton		0.94399999999999995	0.95599999999999996	0.96099999999999997	0.95	Yes	Yes	F	2	Strain 2			18	9	9	1R1_2R1_3R1_4R1_5_6_7_8_9_10R1_11_12_13_15_19_22_26_27R1	5	1	4	1R1-7-8|2R1-3R1-5-6-9-10R1-11-15-19|4R1-12-13|22|26-27R1	242100000	159900000	82200000	77700000	18
380	380T1	'06/0368	'985120016083419	Unmatched	Clade_A1	Clade_A1-3A	DFT1_3	DFT1_3A	1828A>G;3255G>A	Forestier	-42.902220999999997	147.83382900000001	2006	12/02/2006	DFT1	Tissue	No	Yes	Yes	Unknown				Singleton		0.89700000000000002	0.90700000000000003	0.88100000000000001	0.90200000000000002	Yes	Yes	M	3	Strain 3			17	9	8	1R1_2R1_3R1_4R1_5_6_7_8_9_10R1_11_12_13_15_19_23_24	4	1	3	1R1-7-8|2R1-3R1-5-6-9-10R1-11-15-19|4R1-12-13|23-24	276200000	159900000	116300000	43600000	17
381	381T1	'06/0858	Unknown	Unmatched	Clade_A2	Clade_A2-1	DFT1_0	DFT1_0	Novariants	Bothwell	-42.325741999999998	146.99906300000001	2006	04/04/2006	DFT1	Tissue	No	Yes	Yes	Unknown				Singleton		0.84199999999999997	0.84499999999999997	Not Available	0.84350000000000003	Yes	Yes	F	Unknown	No data (confirmed)	M5 loss		24	9	15	1R1_2R1_3R1_4R1_5_6_6BM7_7_8_9_10R1_11_11BM7_12_13_15_16R7_17R7_18R7_19_88_95_506_507	5	1	4	1R1-7-8|2R1-3R1-5-6-9-10R1-11-15-19|4R1-12-13|6BM7-11BM7-16R7-17R7-18R7-88-95|506-507	245707000	159900000	85807000	74093000	24
382	382T1	'06/1360	'985120016101648	Unmatched	Clade_A1	Clade_A1-3A	DFT1_3	DFT1_3A	1828A>G;3255G>A	Forestier	-42.902220999999997	147.83382900000001	2006	25/05/2006	DFT1	Tissue	No	Yes	Yes	Unknown				Singleton		0.76600000000000001	0.77100000000000002	0.86899999999999999	0.76849999999999996	Yes	Yes	unknown	Unknown	No data (confirmed)			17	9	8	1R1_2R1_3R1_4R1_5_6_7_8_9_10R1_11_12_13_15_19_23_24	4	1	3	1R1-7-8|2R1-3R1-5-6-9-10R1-11-15-19|4R1-12-13|23-24	276200000	159900000	116300000	43600000	17
383	383T1	'06/1440	Unknown	Unmatched	Clade_A1	Clade_A1-3A7	DFT1_3	DFT1_3A7	1828A>G;3255G>A;12374T>C	Forestier	-42.902220999999997	147.83382900000001	2006	01/06/2006	DFT1	Tissue	No	Yes	Yes	Unknown				Singleton		0.77800000000000002	0.79600000000000004	0.82599999999999996	0.78700000000000003	Yes	Yes	M	Unknown	No data (confirmed)			17	9	8	1R1_2R1_3R1_4R1_5_6_7_8_9_10R1_11_12_13_15_19_23_24	4	1	3	1R1-7-8|2R1-3R1-5-6-9-10R1-11-15-19|4R1-12-13|23-24	276200000	159900000	116300000	43600000	17
384	384T1	'06/1926	Unknown	Unmatched	Clade_B	Clade_B-9	DFT1_2	DFT1_2	14114C>T	Deloraine	-41.582307999999998	146.70809700000001	2006	13/07/2006	DFT1	Tissue	No	Yes	Yes	Unknown				Singleton		0.88800000000000001	0.90100000000000002	0.91200000000000003	0.89449999999999996	Yes	Yes	F	2	Strain 2			20	9	11	1R1_2R1_3R1_4R1_5_6_7_8_9_10R1_11_12_13_15_19_20R1_21R1_25_531_532	7	1	6	1R1-7-8|2R1-3R1-5-6-9-10R1-11-15-19|4R1-12-13|20R1|21R1|25|531-532	227400000	159900000	67500000	92400000	20
385	385T1	'06/3520	'982009104272755	Unmatched	Clade_A1	Clade_A1-3A	DFT1_3	DFT1_3A	1828A>G;3255G>A	Forestier	-42.902220999999997	147.83382900000001	2006	13/12/2006	DFT1	Tissue	No	Yes	Yes	Unknown				Singleton		0.70099999999999996	0.69899999999999995	0.90500000000000003	0.7	Yes	Yes	F	1	Strain 5	M5 loss		27	13	14	1R1_2R1_3R1_4R1_5_6_6BM37_7_8_9_10R1_11_11BM37_12_13_15_16R37_17R37_18R37_19_23_24_208_208G1CN4_434_1846_1846G1CN4	7	3	4	1R1-7-8|2R1-3R1-5-6-9-10R1-11-15-19|4R1-12-13|6BM37-11BM37-16R37-17R37-18R37-434|23-24|208|208G1CN4-1846-1846G1CN4	301907000	166300000	135607000	30693000	27
386	386T1	'07/0373	'985120016077276	Matched	Clade_A1	Clade_A1-3A	DFT1_3	DFT1_3A	1828A>G;3255G>A	Forestier	-42.902220999999997	147.83382900000001	2007	02/02/2007	DFT1	Tissue	No	Yes	Yes	Unknown				Singleton		0.86299999999999999	0.878	0.85299999999999998	0.87050000000000005	Yes	Yes	F	4	Strain 3			17	9	8	1R1_2R1_3R1_4R1_5_6_7_8_9_10R1_11_12_13_15_19_23_24	4	1	3	1R1-7-8|2R1-3R1-5-6-9-10R1-11-15-19|4R1-12-13|23-24	276200000	159900000	116300000	43600000	17
387	387T1	'07/0679	'982009100371954	Matched	Clade_A1	Clade_A1-3A7	DFT1_3	DFT1_3A7	1828A>G;3255G>A;12374T>C	Launceston (captive)	-	-	2007	01/03/2007	DFT1	Tissue	Experimental transmission (biopsy transfer)	Yes	No (experimental transmission)	Facial/oral (experimentally inoculated)				Multiple		0.76700000000000002	0.79300000000000004	0.84399999999999997	0.78	Yes	Yes	M	4	Strain 3			17	9	8	1R1_2R1_3R1_4R1_5_6_7_8_9_10R1_11_12_13_15_19_23_24	4	1	3	1R1-7-8|2R1-3R1-5-6-9-10R1-11-15-19|4R1-12-13|23-24	276200000	159900000	116300000	43600000	17
387	387T2	'07/1417	'982009100371954	Matched	Clade_A1	Clade_A1-3A7	DFT1_3	DFT1_3A7a	1828A>G;3255G>A;12374T>C;11142G>A	Launceston (captive)	-	-	2007	08/05/2007	DFT1	Tissue	Experimental transmission (biopsy transfer)	Yes	No (experimental transmission)	Facial/oral (experimentally inoculated)				Multiple	Time-course	0.80700000000000005	0.82099999999999995	0.76300000000000001	0.81399999999999995	Yes	Yes	M	4	Strain 3			17	9	8	1R1_2R1_3R1_4R1_5_6_7_8_9_10R1_11_12_13_15_19_23_24	4	1	3	1R1-7-8|2R1-3R1-5-6-9-10R1-11-15-19|4R1-12-13|23-24	276200000	159900000	116300000	43600000	17
388	388T2	'07/0681	'985120016101682	Matched	Clade_B	Clade_B-4	DFT1_4	DFT1_4	7198T>C	Launceston (captive)	-	-	2007	01/03/2007	DFT1	Experimental transmission (cell-line)	Experimental transmission (cell-line; inoculation date: unknown)	Yes	No (experimental transmission)	Unknown				Singleton		0.13500000000000001	0.11600000000000001	0.51300000000000001	0.1255	Yes	No	M	5	No data	No data
389	389T1	'07/0817	'00065DC9C5	Matched	Clade_B	Clade_B-9	DFT1_2	DFT1_2	14114C>T	Mole Creek (captive)	-41.552312999999998	146.45533829999999	2007	09/03/2007	DFT1	Tissue	No	Yes	Yes	Unknown				Singleton		0.57999999999999996	0.55100000000000005	0.66	0.5655	Yes	Yes	F	Unknown	Strain 2			18	9	9	1R1_2R1_3R1_4R1_5_6_7_8_9_10R1_11_12_13_15_19_20R1_21R1_25	6	1	5	1R1-7-8|2R1-3R1-5-6-9-10R1-11-15-19|4R1-12-13|20R1|21R1|25	225000000	159900000	65100000	94800000	18
390	390T1	'07/1152	'982009100876802	Matched	Clade_A2	Clade_A2-7	DFT1_0	DFT1_0	Novariants	Freycinet	-42.096167999999999	148.256516	2007	16/04/2007	DFT1	Tissue	No	No (missing data)	Yes	Unknown				Singleton		0.41099999999999998	Not Available	Not Available	0.41099999999999998	No	Yes	F	2	Strain 2			18	9	9	1R1_2R1_3R1_4R1_5_6_7_8_9_10R1_11_12_13_15_19_22_26_27R1	5	1	4	1R1-7-8|2R1-3R1-5-6-9-10R1-11-15-19|4R1-12-13|22|26-27R1	242100000	159900000	82200000	77700000	18
393	393T1	'07/1254	'982009102235882	Unmatched	Clade_B	Clade_B-4	DFT1_4	DFT1_4	7198T>C	Fentonbury	-42.653722000000002	146.76054099999999	2007	23/04/2007	DFT1	Tissue	No	Yes	Yes	Unknown				Singleton		0.90700000000000003	0.88700000000000001	0.53400000000000003	0.89700000000000002	Yes	Yes	F	2	Strain 2			17	9	8	1R1_2R1_3R1_4R1_5_6_7_8_9_10R1_11_12_13_15_19_20R1_25	5	1	4	1R1-7-8|2R1-3R1-5-6-9-10R1-11-15-19|4R1-12-13|20R1|25	212500000	159900000	52600000	107300000	17
394	394T5	'07/1316	'982009100831798	Unmatched	Clade_B	Clade_B-4	DFT1_4	DFT1_4	7198T>C	Fentonbury	-42.653722000000002	146.76054099999999	2007	30/04/2007	DFT1	Tissue	No	Yes	Yes	Unknown				Singleton		0.89500000000000002	0.875	0.51900000000000002	0.88500000000000001	Yes	Yes	F	3	No data (confirmed)			18	9	9	1R1_2R1_3R1_4R1_5_6_7_8_9_10R1_11_12_13_15_19_20R1_25_562	6	1	5	1R1-7-8|2R1-3R1-5-6-9-10R1-11-15-19|4R1-12-13|20R1|25|562	213700000	159900000	53800000	106100000	18
395	395T1	'07/1324	'982009102247939	Unmatched	Clade_A1	Clade_A1-1	DFT1_0	DFT1_0	Novariants	Freycinet	-42.096167999999999	148.256516	2007	01/05/2007	DFT1	Tissue	No	Yes	Yes	Unknown				Singleton		0.54200000000000004	0.54100000000000004	Not Available	0.54149999999999998	Yes	Yes	M	2	No data (confirmed)			35	28	7	1R1_2R1_3R1_4R1_5_6_7_8_9_10R1_11_12_13_15_19_48R1_55R1_56R1_63_63G1CN4_63G1CN5_63G1CN6_63G1CN7_64_64G1CN4_64G1CN5_64G1CN6_64G1CN7_65_65G1CN4_65G1CN5_65G1CN6_65G1CN7_66_70	7	4	3	1R1-7-8|2R1-3R1-5-6-9-10R1-11-15-19|4R1-12-13|48R1-55R1-56R1-63-63G1CN4-64-64G1CN4-65-65G1CN4-66|63G1CN5-63G1CN6-64G1CN5-64G1CN6-65G1CN5-65G1CN6|63G1CN7-64G1CN7-65G1CN7|70	287100000	235200000	51900000	183300000	35
396	396T1	'07/1537	'982009104815428	Unmatched	Clade_A2	Clade_A2-10	DFT1_0	DFT1_0	Novariants	West Pencil Pine	-41.717464999999997	145.85587000000001	2007	16/05/2007	DFT1	Tissue	No	Yes	Yes	Unknown				Singleton		0.49199999999999999	0.46700000000000003	0.67500000000000004	0.47949999999999998	Yes	Yes	M	5	Strain 1	M5 loss		23	9	14	1R1_2R1_3R1_4R1_5_6_6BM17_7_8_9_10R1_11_11BM17_12_13_15_16R17_17R17_18R17_19_22_26_27R1	6	1	5	1R1-7-8|2R1-3R1-5-6-9-10R1-11-15-19|4R1-12-13|6BM17-11BM17-16R17-17R17-18R17|22|26-27R1	250307000	159900000	90407000	69493000	23
397	397T2	'07/1714	'982009104267602	Unmatched	Clade_A2	Clade_A2-8	DFT1_1	DFT1_1	10133C>T	Westbury	-41.526670000000003	146.82378	2007	29/05/2007	DFT1	Tissue	No	Yes	Yes	Unknown				Singleton		0.88700000000000001	0.872	Not Available	0.87949999999999995	Yes	Yes	F	3	Strain 1	M5 loss	Tetraploid (5)	25	9	16	1R1_2R1_3R1_4R1_5_6_6BM17_7_8_9_10R1_11_11BM17_12_13_15_16R17_17R17_18R17_19_22_26_27R1_308_309	7	1	6	1R1-7-8|2R1-3R1-5-6-9-10R1-11-15-19|4R1-12-13|6BM17-11BM17-16R17-17R17-18R17|22|26-27R1|308-309	260307000	159900000	100407000	59493000
398	398T1	'07/1872	'982009102626938	Matched	Clade_A2	Clade_A2-8	DFT1_1	DFT1_1	10133C>T	Reedy Marsh	-41.401451999999999	146.740793	2007	08/06/2007	DFT1	Tissue	No	Yes	Yes	Unknown				Singleton		0.94599999999999995	Not Available	0.90700000000000003	0.94599999999999995	No	Yes	F	Unknown	Strain 1	M5 loss	Tetraploid (5)	26	9	17	1R1_2R1_3R1_4R1_5_6_6BM17_7_8_9_9BM29_10R1_11_11BM17_12_13_15_16R17_17R17_18R17_19_22_26_27R1_80_984	8	1	7	1R1-7-8|2R1-3R1-5-6-9-10R1-11-15-19|4R1-12-13|6BM17-11BM17-16R17-17R17-18R17|9BM29|22|26-27R1|80-984	317655957	159900000	157755957	2144043
399	399T1	'07/2622	Unknown	Matched	Clade_A1	Clade_A1-3A	DFT1_3	DFT1_3A	1828A>G;3255G>A	Forestier	-42.902220999999997	147.83382900000001	2007	21/08/2007	DFT1	Tissue	No	Yes	Yes	Unknown				Singleton		0.372	0.36799999999999999	0.56299999999999994	0.37	Yes	Yes	F	Unknown	Strain 3			17	9	8	1R1_2R1_3R1_4R1_5_6_7_8_9_10R1_11_12_13_15_19_23_24	4	1	3	1R1-7-8|2R1-3R1-5-6-9-10R1-11-15-19|4R1-12-13|23-24	276200000	159900000	116300000	43600000	17
400	400T1	'07/3275	'982009105155409	Matched	Clade_B	Clade_B-4	DFT1_4	DFT1_4	7198T>C	Fentonbury	-42.653722000000002	146.76054099999999	2007	12/10/2007	DFT1	Tissue	No	Yes	Yes	Unknown				Singleton		0.81499999999999995	0.81799999999999995	0.872	0.8165	Yes	Yes	M	1	Strain 2			17	9	8	1R1_2R1_3R1_4R1_5_6_7_8_9_10R1_11_12_13_15_19_20R1_25	5	1	4	1R1-7-8|2R1-3R1-5-6-9-10R1-11-15-19|4R1-12-13|20R1|25	212500000	159900000	52600000	107300000	17
401	401T1	'07/3521	'982009100771787	Matched	Clade_A1	Clade_A1-3A2	DFT1_3	DFT1_3A2a	1828A>G;3255G>A;3430T>A;4311G>A	Forestier	-42.902220999999997	147.83382900000001	2007	06/11/2007	DFT1	Tissue	No	Yes	Yes	Unknown				Singleton		0.82799999999999996	0.84899999999999998	0.873	0.83850000000000002	Yes	Yes	M	3	Strain 3			17	9	8	1R1_2R1_3R1_4R1_5_6_7_8_9_10R1_11_12_13_15_19_23_24	4	1	3	1R1-7-8|2R1-3R1-5-6-9-10R1-11-15-19|4R1-12-13|23-24	276200000	159900000	116300000	43600000	17
402	402T1	'07/3559	'982009100887589	Matched	Clade_A1	Clade_A1-3A	DFT1_3	DFT1_3A	1828A>G;3255G>A	Forestier	-42.902220999999997	147.83382900000001	2007	08/11/2007	DFT1	Tissue	No	Yes	Yes	Unknown				Singleton		0.61599999999999999	0.66	0.83799999999999997	0.63800000000000001	Yes	Yes	F	3	No data (confirmed)			18	9	9	1R1_2R1_3R1_4R1_5_6_7_8_9_10R1_11_12_13_15_19_23_24_207	5	1	4	1R1-7-8|2R1-3R1-5-6-9-10R1-11-15-19|4R1-12-13|23-24|207	277200000	159900000	117300000	42600000	18
403	403T1	'07/3560	'982009100365437	Matched	Clade_A1	Clade_A1-3A	DFT1_3	DFT1_3A	1828A>G;3255G>A	Forestier	-42.902220999999997	147.83382900000001	2007	08/11/2007	DFT1	Tissue	No	Yes	Yes	Unknown				Singleton		0.746	0.78700000000000003	0.879	0.76649999999999996	Yes	Yes	F	2	No data (confirmed)			17	9	8	1R1_2R1_3R1_4R1_5_6_7_8_9_10R1_11_12_13_15_19_23_24	4	1	3	1R1-7-8|2R1-3R1-5-6-9-10R1-11-15-19|4R1-12-13|23-24	276200000	159900000	116300000	43600000	17
404	404T1	'07/3597	'982009104835261	Unmatched	Clade_A1	Clade_A1-3A	DFT1_3	DFT1_3A	1828A>G;3255G>A	Forestier	-42.902220999999997	147.83382900000001	2007	12/11/2007	DFT1	Tissue	No	Yes	Yes	Unknown				Singleton		0.56699999999999995	0.59599999999999997	0.79	0.58150000000000002	Yes	Yes	F	1	Strain 3			17	9	8	1R1_2R1_3R1_4R1_5_6_7_8_9_10R1_11_12_13_15_19_23_24	4	1	3	1R1-7-8|2R1-3R1-5-6-9-10R1-11-15-19|4R1-12-13|23-24	276200000	159900000	116300000	43600000	17
405	405T1	'07/3844	'982009105131115	Unmatched	Clade_C	Clade_C-2	DFT1_0	DFT1_0	Novariants	Gunns Plains	-41.284571999999997	146.05047099999999	2007	02/12/2007	DFT1	Tissue	No	Yes	Yes	Unknown				Singleton		0.86499999999999999	0.877	Not Available	0.871	Yes	Yes	F	4	Strain 1			15	9	6	1R1_2R1_3R1_4R1_5_6_7_8_9_10R1_11_12_13_15_19	3	1	2	1R1-7-8|2R1-3R1-5-6-9-10R1-11-15-19|4R1-12-13	211000000	159900000	51100000	108800000	15
406	406T1	'08/0115	Unknown	Matched	Clade_B	Clade_B-3	DFT1_0	DFT1_0	Novariants	New Norfolk	-42.775790999999998	147.06791200000001	2008	11/01/2008	DFT1	Tissue	No	Yes	Yes	Unknown				Singleton		0.80500000000000005	0.78100000000000003	Not Available	0.79300000000000004	Yes	Yes	F	2	Strain 2			16	9	7	1R1_2R1_3R1_4R1_5_6_7_8_9_10R1_11_12_13_15_19_20R1	4	1	3	1R1-7-8|2R1-3R1-5-6-9-10R1-11-15-19|4R1-12-13|20R1	212000000	159900000	52100000	107800000	16
407	407T1	'08/0310	Unknown	Matched	Clade_B	Clade_B-9	DFT1_2	DFT1_2	14114C>T	Mole Creek	-41.561492999999999	146.401814	2008	05/02/2008	DFT1	Tissue	No	Yes	Yes	Unknown				Singleton		0.91700000000000004	0.90500000000000003	0.85899999999999999	0.91100000000000003	Yes	Yes	M	2	No data (confirmed)			22	9	13	1R1_2R1_3R1_4R1_5_6_7_8_9_10R1_11_12_13_15_19_20R1_21R1_25_164R2_165R2_534_914	7	1	6	1R1-7-8|2R1-3R1-5-6-9-10R1-11-15-19|4R1-12-13|20R1|21R1|25|164R2-165R2-534-914	247400000	159900000	87500000	72400000	22
408	408T1	'08/0590	Unknown	Matched (MIPs Only)	Clade_A2	Clade_A2-10	DFT1_0	DFT1_0	Novariants	West Pencil Pine	-41.717464999999997	145.85587000000001	2008	26/02/2008	DFT1	Tissue	No	Yes	Yes	Unknown				Singleton		0.83599999999999997	0.82699999999999996	Not Available	0.83150000000000002	Yes	Yes	F	4	Strain 1	M5 loss		23	9	14	1R1_2R1_3R1_4R1_5_6_6BM17_7_8_9_10R1_11_11BM17_12_13_15_16R17_17R17_18R17_19_22_26_27R1	6	1	5	1R1-7-8|2R1-3R1-5-6-9-10R1-11-15-19|4R1-12-13|6BM17-11BM17-16R17-17R17-18R17|22|26-27R1	250307000	159900000	90407000	69493000	23
409	409T1	'08/0696	Unknown	Matched	Clade_C	Clade_C-2	DFT1_30	DFT1_30	10620T>A	Deloraine	-41.582307999999998	146.70809700000001	2008	06/03/2008	DFT1	Tissue	No	Yes	Yes	Unknown				Singleton		0.85799999999999998	0.874	Not Available	0.86599999999999999	Yes	Yes	F	2	No data (confirmed)			15	9	6	1R1_2R1_3R1_4R1_5_6_7_8_9_10R1_11_12_13_15_19	3	1	2	1R1-7-8|2R1-3R1-5-6-9-10R1-11-15-19|4R1-12-13	211000000	159900000	51100000	108800000	15
410	410T1	'08/1047	'982009104833287	Matched (MIPs Only)	Clade_A1	Clade_A1-3A2	DFT1_3	DFT1_3A2a	1828A>G;3255G>A;3430T>A;4311G>A	Forestier	-42.902220999999997	147.83382900000001	2008	14/04/2008	DFT1	Tissue	No	Yes	Yes	Unknown				Singleton		0.876	0.90600000000000003	0.92400000000000004	0.89100000000000001	Yes	Yes	M	2	No data (confirmed)			17	9	8	1R1_2R1_3R1_4R1_5_6_7_8_9_10R1_11_12_13_15_19_23_24	4	1	3	1R1-7-8|2R1-3R1-5-6-9-10R1-11-15-19|4R1-12-13|23-24	276200000	159900000	116300000	43600000	17
411	411T1	'08/1135	Unknown	Unmatched	Clade_C	Clade_C-2	DFT1_0	DFT1_0	Novariants	Burnie	-41.053489999999996	145.90613200000001	2008	21/04/2008	DFT1	Tissue	No	Yes	Yes	Unknown				Singleton		0.79300000000000004	0.81799999999999995	Not Available	0.80549999999999999	Yes	Yes	M	Unknown	No data (confirmed)	M5 loss		22	9	13	1R1_2R1_3R1_4R1_5_6_6BM30_7_8_9_10R1_11_11BM30_12_13_15_16R30_17R30_18R30_19_81_817	5	1	4	1R1-7-8|2R1-3R1-5-6-9-10R1-11-15-19|4R1-12-13|6BM30-11BM30-16R30-17R30-18R30|81-817	225807000	159900000	65907000	93993000	21
412	412T1	'08/1411	Unknown	Matched	Clade_B	Clade_B-3	DFT1_19	DFT1_19	2322C>A	Kempton	-42.525894000000001	147.20354900000001	2008	13/05/2008	DFT1	Tissue	No	Yes	Yes	Unknown				Singleton		0.80400000000000005	0.79200000000000004	0.88500000000000001	0.79800000000000004	Yes	Yes	F	3	No data (confirmed)			17	9	8	1R1_2R1_3R1_4R1_5_6_7_8_9_10R1_11_12_13_15_19_20R1_563	5	1	4	1R1-7-8|2R1-3R1-5-6-9-10R1-11-15-19|4R1-12-13|20R1|563	236300000	159900000	76400000	83500000	17
413	413T1	'08/1460	'982009104720454	Matched	Clade_B	Clade_B-3	DFT1_7	DFT1_7A	2707G>A;8529G>A	Kempton	-42.525894000000001	147.20354900000001	2008	19/05/2008	DFT1	Tissue	No	Yes	Yes	Unknown				Singleton		0.88500000000000001	0.92100000000000004	0.96799999999999997	0.90300000000000002	Yes	Yes	F	1	No data (confirmed)			20	9	11	1R1_2R1_3R1_4R1_5_6_7_8_9_10R1_11_12_13_15_19_20R1_47R1_51R3_57_58	5	1	4	1R1-7-8|2R1-3R1-5-6-9-10R1-11-15-19|4R1-12-13|20R1|47R1-51R3-57-58	263500000	159900000	103600000	56300000	20
414	414T1	'08/1461	'982009104881646	Matched	Clade_B	Clade_B-3	DFT1_7	DFT1_7A	2707G>A;8529G>A	Kempton	-42.525894000000001	147.20354900000001	2008	19/05/2008	DFT1	Tissue	No	Yes	Yes	Unknown				Singleton		0.79900000000000004	0.81799999999999995	0.93300000000000005	0.8085	Yes	Yes	M	2	No data (confirmed)			20	9	11	1R1_2R1_3R1_4R1_5_6_7_8_9_10R1_11_12_13_15_19_20R1_47R1_51R3_57_58	5	1	4	1R1-7-8|2R1-3R1-5-6-9-10R1-11-15-19|4R1-12-13|20R1|47R1-51R3-57-58	263500000	159900000	103600000	56300000	20
415	415T1	'08/1620	'982009105145532	Matched	Clade_A2	Clade_A2-11	DFT1_0	DFT1_0	Novariants	West Pencil Pine	-41.717464999999997	145.85587000000001	2008	02/06/2008	DFT1	Tissue	No	Yes	Yes	Unknown				Singleton		0.79700000000000004	0.78	Not Available	0.78849999999999998	Yes	Yes	M	2	Strain 1	M5 loss		31	16	15	1R1_2R1_3R1_4R1_5_5G1CN4_6_6BM17_7_8_9_10R1_11_11BM17_12_13_15_16R17_17R17_18R17_19_22_26_27R1_28R1_29_31_32_487_488_1834	9	3	6	1R1-7-8|2R1-3R1-5-6-9-10R1-11-15-19|4R1-12-13|5G1CN4-28R1-29-31-32-1834|6BM17-11BM17-16R17-17R17-18R17|22|26-27R1|487|488	306307000	211400000	94907000	116493000	27
416	416T1	'08/1703	'982009104916387	Matched	Clade_A2	Clade_A2-6	DFT1_6	DFT1_6	3161G>A	Glen Huon	-43.027470999999998	146.94150300000001	2008	05/06/2008	DFT1	Tissue	No	Yes	Yes	Unknown				Singleton		0.76100000000000001	0.77900000000000003	0.81799999999999995	0.77	Yes	Yes	M	3	No data (confirmed)			18	9	9	1R1_2R1_3R1_4R1_5_6_7_8_9_10R1_11_12_13_15_19_22_26_27R1	5	1	4	1R1-7-8|2R1-3R1-5-6-9-10R1-11-15-19|4R1-12-13|22|26-27R1	242100000	159900000	82200000	77700000	18
417	417T1	'08/1729	'982009104906614	Matched	Clade_A2	Clade_A2-6	DFT1_6	DFT1_6	3161G>A	Kempton	-42.525894000000001	147.20354900000001	2008	06/06/2008	DFT1	Tissue	No	Yes	Yes	Unknown				Singleton		0.72199999999999998	0.71699999999999997	0.82799999999999996	0.71950000000000003	Yes	Yes	F	3	No data (confirmed)			18	9	9	1R1_2R1_3R1_4R1_5_6_7_8_9_10R1_11_12_13_15_19_22_26_27R1	5	1	4	1R1-7-8|2R1-3R1-5-6-9-10R1-11-15-19|4R1-12-13|22|26-27R1	242100000	159900000	82200000	77700000	18
419	419T1	'08/1868	'985120016082881	Matched	Clade_A2	Clade_A2-8	DFT1_1	DFT1_1	10133C>T	Narawntapu	-41.139961999999997	146.64416399999999	2008	18/06/2008	DFT1	Tissue	No	Yes	Yes	Unknown				Multiple		0.89100000000000001	0.89100000000000001	0.91400000000000003	0.89100000000000001	Yes	Yes	F	5	Strain 6a	M5 loss	Tetraploid (5)	25	9	16	1R1_2R1_3R1_4R1_5_6_6BM17_7_8_9_10R1_11_11BM17_12_13_15_16R17_17R17_18R17_19_22_26_27R1_80_984	7	1	6	1R1-7-8|2R1-3R1-5-6-9-10R1-11-15-19|4R1-12-13|6BM17-11BM17-16R17-17R17-18R17|22|26-27R1|80-984	308607000	159900000	148707000	11193000
419	419T2	'08/2968	'985120016082881	Matched	Clade_A2	Clade_A2-8	DFT1_1	DFT1_1	10133C>T	Narawntapu	-41.139961999999997	146.64416399999999	2008	18/06/2008	DFT1	Tissue	No	Yes	No (time-course sample)	Unknown				Multiple	Time-course	0.748	0.74	0.91700000000000004	0.74399999999999999	Yes	Yes	F	5	Strain 6a	M5 loss	Tetraploid (5)	25	9	16	1R1_2R1_3R1_4R1_5_6_6BM17_7_8_9_10R1_11_11BM17_12_13_15_16R17_17R17_18R17_19_22_26_27R1_80_984	7	1	6	1R1-7-8|2R1-3R1-5-6-9-10R1-11-15-19|4R1-12-13|6BM17-11BM17-16R17-17R17-18R17|22|26-27R1|80-984	308607000	159900000	148707000	11193000
420	420T1	'08/2031	'982009104805663	Matched	Clade_B	Clade_B-9	DFT1_2	DFT1_2	14114C>T	Lake Rowallan	-41.730282000000003	146.215249	2008	30/06/2008	DFT1	Tissue	No	Yes	Yes	Unknown				Singleton		0.75600000000000001	0.75	0.745	0.753	Yes	Yes	M	3	No data (confirmed)			21	9	12	1R1_2R1_3R1_4R1_5_6_7_8_9_10R1_11_12_13_15_19_20R1_21R1_25_804_805_806	7	1	6	1R1-7-8|2R1-3R1-5-6-9-10R1-11-15-19|4R1-12-13|20R1|21R1|25|804-805-806	248800000	159900000	88900000	71000000	18
421	421T1	'08/2177	'982009104349644	Matched	Clade_A2	Clade_A2-3	DFT1_10	DFT1_10	2261T>C	Ringarooma	-41.254497999999998	147.73432299999999	2008	14/07/2008	DFT1	Tissue	No	Yes	Yes	Unknown				Singleton		0.93300000000000005	0.94699999999999995	0.89100000000000001	0.94	Yes	Yes	M	2	No data (confirmed)	M5 loss		26	10	16	1R1_2R1_3R1_4R1_5_6_6BM11_7_8_9_10R1_11_11BM11_12_13_15_16R11_17R11_18R11_19_22_26_27R1_67R2_160_1032R2	8	2	6	1R1-7-8|2R1-3R1-5-6-9-10R1-11-15-19|4R1-12-13|6BM11-11BM11-16R11-17R11-18R11|22|26-27R1|67R2-1032R2|160	292448000	200000000	92448000	107552000	19
422	422T1	'08/2178	'982009104358247	Matched	Clade_A2	Clade_A2-3	DFT1_10	DFT1_10	2261T>C	Ringarooma	-41.254497999999998	147.73432299999999	2008	14/07/2008	DFT1	Tissue	No	Yes	Yes	Unknown				Singleton		0.72299999999999998	0.71799999999999997	0.72899999999999998	0.72050000000000003	Yes	Yes	M	2	Strain 2 evolved			21	10	11	1R1_2R1_3R1_4R1_5_6_7_8_9_10R1_11_12_13_15_19_22_26_27R1_67R2_160_1032R2	7	2	5	1R1-7-8|2R1-3R1-5-6-9-10R1-11-15-19|4R1-12-13|22|26-27R1|67R2-1032R2|160	284241000	200000000	84241000	115759000	21
423	423T1	'08/2476	'982009105139133	Matched	Clade_B	Clade_B-9	DFT1_2	DFT1_2	14114C>T	Deloraine	-41.582307999999998	146.70809700000001	2008	07/08/2008	DFT1	Tissue	No	Yes	Yes	Unknown				Singleton		0.878	0.89100000000000001	0.92400000000000004	0.88449999999999995	Yes	Yes	F	2	Strain 3 evolved			18	9	9	1R1_2R1_3R1_4R1_5_6_7_8_9_10R1_11_12_13_15_19_20R1_21R1_25	6	1	5	1R1-7-8|2R1-3R1-5-6-9-10R1-11-15-19|4R1-12-13|20R1|21R1|25	225000000	159900000	65100000	94800000	18
424	424T1	'08/2871	'982009104836906	Matched	Clade_A1	Clade_A1-3A	DFT1_3	DFT1_3A	1828A>G;3255G>A	Glen Huon	-43.027470999999998	146.94150300000001	2008	08/09/2008	DFT1	Tissue	No	Yes	Yes	Unknown				Singleton		0.52200000000000002	0.54100000000000004	0.79500000000000004	0.53149999999999997	Yes	Yes	F	2	Strain 3 evolved			21	11	10	1R1_2R1_3R1_4R1_5_6_7_8_9_10R1_11_12_13_15_19_23_24_286R1_418_419_420	6	2	4	1R1-7-8|2R1-3R1-5-6-9-10R1-11-15-19|4R1-12-13|23-24|286R1-420|418-419	294600000	174300000	120300000	54000000	21
425	425T1	'08/2872	'982009104822360	Matched	Clade_B	Clade_B-3	DFT1_7	DFT1_7A	2707G>A;8529G>A	Glen Huon	-43.027470999999998	146.94150300000001	2008	Unknown	DFT1	Tissue	No	Yes	Yes	Unknown				Singleton		0.82499999999999996	0.872	0.92400000000000004	0.84850000000000003	Yes	Yes	F	2	Strain 2 evolved			20	9	11	1R1_2R1_3R1_4R1_5_6_7_8_9_10R1_11_12_13_15_19_20R1_47R1_51R3_57_58	5	1	4	1R1-7-8|2R1-3R1-5-6-9-10R1-11-15-19|4R1-12-13|20R1|47R1-51R3-57-58	263500000	159900000	103600000	56300000	20
426	426T1	'08/2873	'982009104867987	Matched	Clade_A1	Clade_A1-3A	DFT1_3	DFT1_3A	1828A>G;3255G>A	Glen Huon	-43.027470999999998	146.94150300000001	2008	Unknown	DFT1	Tissue	No	Yes	Yes	Unknown				Singleton		0.69499999999999995	0.753	0.91600000000000004	0.72399999999999998	Yes	Yes	F	2	Strain 2			20	12	8	1R1_2R1_3R1_4R1_5_6_7_8_9_10R1_11_12_13_15_19_23_24_208_297_298	6	3	3	1R1-7-8|2R1-3R1-5-6-9-10R1-11-15-19|4R1-12-13|23-24|208|297-298	280000000	163700000	116300000	47400000	20
427	427T1	'08/2935	'00065DD538	Matched	Clade_B	Clade_B-8	DFT1_2	DFT1_2	14114C>T	Hobart (captive)	-	-	2008	Unknown	DFT1	Experimental transmission (cell-line)	Experimental transmission (cell-line; inoculation date: unknown)	Yes	No (experimental transmission)	Unknown				Singleton		0.95	0.96399999999999997	0.92700000000000005	0.95699999999999996	Yes	Yes	M	Unknown	Tetraploid	M5 loss		35	17	18	1R1_2R1_2R1BM21_3R1_3R1BM21_4R1_5_6_6BM26_7_8_9_9BM21_10R1_10R1BM21_11_11BM26_12_13_15_15BM21_16R26_19_20R1_21R1_25_34R21_35R21_36R21_37R21_38R21_39R21_515_987G1CN4_1810G1CN4	8	2	6	1R1-7-8|2R1-3R1-5-6-9-10R1-11-15-19|2R1BM21-3R1BM21-6BM26-9BM21-10R1BM21-11BM26-15BM21-16R26-515|4R1-12-13|20R1|21R1|25|34R21-35R21-36R21-37R21-38R21-39R21-987G1CN4-1810G1CN4	524300000	284900000	239400000	45500000	35
428	428T1	'08/3033	'982009102236127	Matched	Clade_A2	Clade_A2-8	DFT1_1	DFT1_1	10133C>T	Narawntapu	-41.139961999999997	146.64416399999999	2008	Unknown	DFT1	Tissue	No	Yes	Yes	Unknown				Singleton		0.72299999999999998	0.74399999999999999	8.7999999999999995E-2	0.73350000000000004	No	Yes	F	4	Strain 1 diploid and tetraploid	M5 loss	Tetraploid (5)	38	16	22	1R1_2R1_2R1BM30_3R1_3R1BM30_4R1_5_6_6BM17_7_8_9_9BM30_10R1_10R1BM30_11_11BM17_12_13_15_15BM30_16R17_17R17_18R17_19_22_26_27R1_34R30_35R30_36R30_37R30_38R30_39R30_69R13_80_984_203R3	9	2	7	1R1-7-8|2R1-3R1-5-6-9-10R1-11-15-19|2R1BM30-3R1BM30-9BM30-10R1BM30-15BM30-203R3|4R1-12-13|6BM17-11BM17-16R17-17R17-18R17|22|26-27R1|34R30-35R30-36R30-37R30-38R30-39R30-69R13|80-984	768707000	252300000	516407000	-264107000
429	429T1	'08/3262	'982009104937739	Matched	Clade_C	Clade_C-2	DFT1_0	DFT1_0	Novariants	Burnie	-41.053489999999996	145.90613200000001	2008	Unknown	DFT1	Tissue	No	Yes	Yes	Unknown				Singleton		0.27700000000000002	0.27100000000000002	0.70299999999999996	0.27400000000000002	Yes	Yes	M	5	No data (confirmed)			15	9	6	1R1_2R1_3R1_4R1_5_6_7_8_9_10R1_11_12_13_15_19	3	1	2	1R1-7-8|2R1-3R1-5-6-9-10R1-11-15-19|4R1-12-13	211000000	159900000	51100000	108800000	15
430	430T1	'08/3449	'982009104937620	Matched (MIPs Only)	Clade_A2	Clade_A2-8	DFT1_1	DFT1_1	10133C>T	Narawntapu	-41.139961999999997	146.64416399999999	2008	Unknown	DFT1	Tissue	No	Yes	Yes	Unknown				Singleton		0.33300000000000002	Not Available	Not Available	0.33300000000000002	No	No	M	2	Strain 6a	No data	Tetraploid (5)
432	432T1	'08/3696	'982009104798550	Matched	Clade_A1	Clade_A1-3A2	DFT1_3	DFT1_3A2a	1828A>G;3255G>A;3430T>A;4311G>A	Forestier	-42.902220999999997	147.83382900000001	2008	11/11/2008	DFT1	Tissue	No	Yes	Yes	Unknown				Singleton		0.88800000000000001	0.91100000000000003	0.91900000000000004	0.89949999999999997	Yes	Yes	F	2	No data (confirmed)			19	11	8	1R1_2R1_3R1_4R1_5_6_7_8_9_10R1_11_12_13_15_19_23_24_123_1830	5	2	3	1R1-7-8|2R1-3R1-5-6-9-10R1-11-15-19|4R1-12-13|23-24|123-1830	354900000	238600000	116300000	122300000	19
433	433T1	'08/4046	'982009104931509	Matched	Clade_A1	Clade_A1-3A	DFT1_3	DFT1_3A	1828A>G;3255G>A	Forestier	-42.902220999999997	147.83382900000001	2008	04/12/2008	DFT1	Tissue	No	Yes	Yes	Unknown				Singleton		0.39200000000000002	0.38300000000000001	0.55000000000000004	0.38750000000000001	Yes	Yes	M	2	No data (confirmed)			21	12	9	1R1_2R1_3R1_4R1_5_6_7_8_9_10R1_11_12_13_15_19_23_24_295R1_295R1G1CN4_296_435	6	2	4	1R1-7-8|2R1-3R1-5-6-9-10R1-11-15-19|4R1-12-13|23-24|295R1-295R1G1CN4-296|435	331400000	197700000	133700000	64000000	21
435	435T	'09/0402	'982009100786171	Matched	Non-DFTD	Non-DFTD	Non-DFTD	Non-DFTD	-	Launceston (captive)	-	-	2009	Unknown	Non-DFTD	Tissue	No	No (not DFT1)	No (not DFT1)	Skin	Left carpal		Lymphoma (cutaneous)	Singleton		Not Available	Not Available	Not Available	N/A	No	Yes	F	6	Non-DFTD			13	1	12	4R4_1392_1394_1396_1397_1398_1402_1403R3_1406_1409R2_1411_1412_1413	2	1	1	4R4-1392-1394-1396-1397-1398-1402-1403R3-1406-1409R2-1412-1413|1411	117600000	800000	116800000	-116000000	1
436	436T1	'09/0431	'982009104839874	Unmatched	Clade_A1	Clade_A1-3A2	DFT1_3	DFT1_3A2a	1828A>G;3255G>A;3430T>A;4311G>A	Forestier	-42.902220999999997	147.83382900000001	2009	Unknown	DFT1	Tissue	No	Yes	Yes	Unknown				Singleton		0.78600000000000003	0.75	0.89100000000000001	0.76800000000000002	Yes	Yes	M	Unknown	Strain 3			19	11	8	1R1_2R1_3R1_4R1_5_6_7_8_9_10R1_11_12_13_15_19_23_24_123_1830	5	2	3	1R1-7-8|2R1-3R1-5-6-9-10R1-11-15-19|4R1-12-13|23-24|123-1830	354900000	238600000	116300000	122300000	19
437	437T	'09/0563	Unknown	Matched	Clade_A2	Clade_A2-4	DFT1_0	DFT1_0	Novariants	Brighton	-42.719988000000001	147.26800700000001	2009	Unknown	DFT1	Tissue	No	Yes	Yes	Unknown				Singleton		0.52500000000000002	0.53500000000000003	Not Available	0.53	Yes	Yes	F	3	No data (confirmed)	M5 loss	Tetraploid (3)	24	9	15	1R1_2R1_3R1_4R1_5_6_6BM12_7_8_9_10R1_11_11BM12_12_13_15_16R12_17R12_18R12_19_22_26_27R1_118	6	1	5	1R1-7-8|2R1-3R1-5-6-9-10R1-11-15-19|4R1-12-13|6BM12-11BM12-16R12-17R12-18R12-118|22|26-27R1	250807000	159900000	90907000	68993000
438	438T1	'09/0724	'982009104927999	Matched	Clade_A1	Clade_A1-3A2	DFT1_3	DFT1_3A2a1	1828A>G;2731A>G;3255G>A;3430T>A;4311G>A	Forestier	-42.902220999999997	147.83382900000001	2009	Unknown	DFT1	Tissue	No	Yes	Yes	Unknown				Singleton		0.86699999999999999	0.91	0.89700000000000002	0.88849999999999996	Yes	Yes	M	2	Strain 3			17	9	8	1R1_2R1_3R1_4R1_5_6_7_8_9_10R1_11_12_13_15_19_23_24	4	1	3	1R1-7-8|2R1-3R1-5-6-9-10R1-11-15-19|4R1-12-13|23-24	276200000	159900000	116300000	43600000	17
439	439T1	'09/0924	'985154000001118	Matched	Clade_A1	Clade_A1-3A	DFT1_3	DFT1_3A	1828A>G;3255G>A	Prospect	-41.470692	147.13282899999999	2009	Unknown	DFT1	Tissue	No	Yes	No (involved captive devil)	Unknown				Singleton		0.82399999999999995	0.85399999999999998	0.90800000000000003	0.83899999999999997	Yes	Yes	F	2	No data (confirmed)			17	9	8	1R1_2R1_3R1_4R1_5_6_7_8_9_10R1_11_12_13_15_19_23_24	4	1	3	1R1-7-8|2R1-3R1-5-6-9-10R1-11-15-19|4R1-12-13|23-24	276200000	159900000	116300000	43600000	17
440	440T1	'09/1196	'00065D7B0B	Matched	Clade_B	Clade_B-9	DFT1_2	DFT1_2	14114C>T	Mole Creek (captive)	-41.552312999999998	146.45533829999999	2009	Unknown	DFT1	Tissue	No	Yes	Yes	Unknown				Singleton		0.86099999999999999	0.86699999999999999	0.91900000000000004	0.86399999999999999	Yes	Yes	F	5	No data (confirmed)			18	9	9	1R1_2R1_3R1_4R1_5_6_7_8_9_10R1_11_12_13_15_19_20R1_21R1_25	6	1	5	1R1-7-8|2R1-3R1-5-6-9-10R1-11-15-19|4R1-12-13|20R1|21R1|25	225000000	159900000	65100000	94800000	18
441	441T1	'09/1278	'985154000001173	Matched	Non-DFTD	Non-DFTD	Non-DFTD	Non-DFTD	-	Beaconsfield	-41.190479000000003	146.811069	2009	Unknown	Non-DFTD	Tissue	No	No (not DFT1)	No (not DFT1)	Unknown			Round cell tumour (cutaneous)	Singleton		Not Available	Not Available	Not Available	N/A	No	Yes	F	4	Non-DFTD			5	1	4	1431_1438_1440_1449_1847	2	1	1	1431-1438-1440-1847|1449	241500000	69700000	171800000	-102100000
442	442T2	'09/1450	'982009104868613	Matched	Clade_A1	Clade_A1-3A2	DFT1_3	DFT1_3A2a1	1828A>G;2731A>G;3255G>A;3430T>A;4311G>A	Forestier	-42.902220999999997	147.83382900000001	2009	25/04/2009	DFT1	Tissue	No	Yes	Yes	Unknown				Singleton		0.53800000000000003	Not Available	0.65200000000000002	0.53800000000000003	No	Yes	F	3	No data			17	9	8	1R1_2R1_3R1_4R1_5_6_7_8_9_10R1_11_12_13_15_19_23_24	4	1	3	1R1-7-8|2R1-3R1-5-6-9-10R1-11-15-19|4R1-12-13|23-24	276200000	159900000	116300000	43600000	17
444	444T1	'09/1466	'982009100675446	Matched	Clade_A1	Clade_A1-3A	DFT1_3	DFT1_3A	1828A>G;3255G>A	Forestier	-42.902220999999997	147.83382900000001	2009	27/04/2009	DFT1	Tissue	No	Yes	Yes	Unknown				Singleton		0.45900000000000002	Not Available	0.72799999999999998	0.45900000000000002	No	Yes	M	4	Strain 3a	M5 loss		27	11	16	1R1_2R1_3R1_4R1_5_6_6BM38_7_8_9_10R1_11_11BM38_12_13_15_16R38_17R38_18R38_19_23_24_33_209_210_915_1848	8	2	6	1R1-7-8|2R1-3R1-5-6-9-10R1-11-15-19|4R1-12-13|6BM38-11BM38-16R38-17R38-18R38|23-24|33|209-210|915-1848	294986906	166079906	128907000	37172906	20
445	445T1	'09/1478	'982009104857449	Unmatched	Clade_A1	Clade_A1-3A2	DFT1_3	DFT1_3A2a	1828A>G;3255G>A;3430T>A;4311G>A	Forestier	-42.902220999999997	147.83382900000001	2009	28/04/2009	DFT1	Tissue	No	Yes	Yes	Unknown				Singleton		0.82399999999999995	Not Available	0.86299999999999999	0.82399999999999995	No	Yes	M	2	No data (confirmed)			19	11	8	1R1_2R1_3R1_4R1_5_6_7_8_9_10R1_11_12_13_15_19_23_24_123_1830	5	2	3	1R1-7-8|2R1-3R1-5-6-9-10R1-11-15-19|4R1-12-13|23-24|123-1830	354900000	238600000	116300000	122300000	19
446	446T1	'09/1719	'98515400001131	Matched	Clade_A2	Clade_A2-1	DFT1_0	DFT1_0	Novariants	Mt Field	-42.675758999999999	146.68549999999999	2009	13/05/2009	DFT1	Tissue	No	Yes	Yes	Unknown				Singleton		0.65300000000000002	Not Available	Not Available	0.65300000000000002	No	Yes	M	Unknown	No data (confirmed)	M5 loss		24	9	15	1R1_2R1_3R1_4R1_5_6_6BM7_7_8_9_10R1_11_11BM7_12_13_15_16R7_17R7_18R7_19_88_95_903_948	5	1	4	1R1-7-8|2R1-3R1-5-6-9-10R1-11-15-19|4R1-12-13|6BM7-11BM7-16R7-17R7-18R7-88-95|903-948	280607000	159900000	120707000	39193000	24
447	447T1	'09/2249	'982009105195861	Matched	Clade_A2	Clade_A2-7	DFT1_0	DFT1_0	Novariants	Bicheno	-41.848377999999997	148.26425599999999	2009	28/06/2009	DFT1	Tissue	No	Yes	Yes	Unknown				Singleton		0.89600000000000002	Not Available	Not Available	0.89600000000000002	No	Yes	F	2	Strain 2 evolved; marker 3 seems to have more on it			20	10	10	1R1_2R1_3R1_4R1_5_6_7_8_9_10R1_11_12_13_15_19_20R2_22_26_27R1_127	7	2	5	1R1-7-8|2R1-3R1-5-6-9-10R1-11-15-19|4R1-12-13|20R2|22|26-27R1|127	263900000	180700000	83200000	97500000	20
448	448T1	'09/2280	'982009106097132	Matched	Clade_A2	Clade_A2-3	DFT1_10	DFT1_10	2261T>C	Ringarooma	-41.254497999999998	147.73432299999999	2009	Unknown	DFT1	Tissue	No	Yes	Yes	Unknown				Singleton		0.88	Not Available	0.94599999999999995	0.88	No	Yes	F	1	Strain 2			19	10	9	1R1_2R1_3R1_4R1_5_6_7_8_9_10R1_11_12_13_15_19_22_26_27R1_160	6	2	4	1R1-7-8|2R1-3R1-5-6-9-10R1-11-15-19|4R1-12-13|22|26-27R1|160	282200000	200000000	82200000	117800000	19
449	449T1	'09/2311	'982009104841247	Unmatched	Clade_A1	Clade_A1-3A	DFT1_3	DFT1_3A	1828A>G;3255G>A	Forestier	-42.902220999999997	147.83382900000001	2009	Unknown	DFT1	Tissue	No	Yes	Yes	Unknown				Singleton		0.501	Not Available	0.69599999999999995	0.501	No	Yes	F	2	Strain 3	M5 loss		26	9	17	1R1_2R1_3R1_4R1_5_6_6BM2_7_8_9_10R1_11_11BM2_12_13_15_16R2_17R2_18R2_19_23_24_33_841_928_1008	7	1	6	1R1-7-8|2R1-3R1-5-6-9-10R1-11-15-19|4R1-12-13|6BM2-11BM2-16R2-17R2-18R2|23-24|33|841-928-1008	329407000	159900000	169507000	-9607000	24
450	450T1	'09/3332	'956000001052372	Matched	Clade_B	Clade_B-9	DFT1_2	DFT1_2	14114C>T	Mole Creek (captive)	-41.552312999999998	146.45533829999999	2009	Unknown	DFT1	Tissue	No	Yes	Yes	Unknown				Singleton		0.81200000000000006	Not Available	0.89400000000000002	0.81200000000000006	No	Yes	M	2	Strain 2			18	9	9	1R1_2R1_3R1_4R1_5_6_7_8_9_10R1_11_12_13_15_19_20R1_21R1_25	6	1	5	1R1-7-8|2R1-3R1-5-6-9-10R1-11-15-19|4R1-12-13|20R1|21R1|25	225000000	159900000	65100000	94800000	18
451	451T1	'09-3427	'MTP000000093427	Matched	Clade_A2	Clade_A2-2	DFT1_0	DFT1_0	Novariants	Scottsdale	-41.172035000000001	147.51837	2009	21/09/2009	DFT1	Tissue	No	Yes	Yes	Unknown				Singleton		0.90400000000000003	Not Available	Not Available	0.90400000000000003	No	Yes	F	Unknown	No data (confirmed)			36	25	11	1R1_2R1_3R1_4R1_5_6_7_8_9_10R1_11_12_13_15_19_22_42R3_122R2_859_859G1CN4_862_862G1CN4_862G1CN5_862G1CN6_863_863G1CN4_865_865G1CN4_866_866G1CN4_866G1CN5_866G1CN6_961_962_1849_1849G1CN4	6	2	4	1R1-7-8|2R1-3R1-5-6-9-10R1-11-15-19|4R1-12-13|22|42R3-122R2-961-962|859-859G1CN4-862-862G1CN4-862G1CN5-862G1CN6-863-863G1CN4-865-865G1CN4-866-866G1CN4-866G1CN5-866G1CN6-1849-1849G1CN4	286900000	196500000	90400000	106100000	36
453	453T1	'09/3500	'982009104867670	Matched	Clade_A1	Clade_A1-3A	DFT1_3	DFT1_3A	1828A>G;3255G>A	Forestier	-42.902220999999997	147.83382900000001	2009	Unknown	DFT1	Tissue	No	Yes	Yes	Unknown				Singleton		0.77900000000000003	Not Available	0.76600000000000001	0.77900000000000003	No	Yes	F	3	Strain 3			30	18	12	1R1_2R1_3R1_4R1_5_6_7_8_9_10R1_11_12_13_15_19_23_24_33_40R3_40R3G1CN4_40R3G1CN5_43R3_43R3G1CN4_43R3G1CN5_49R3_49R3G1CN4_49R3G1CN5_59R3_844_1031	7	2	5	1R1-7-8|2R1-3R1-5-6-9-10R1-11-15-19|4R1-12-13|23-24|33|40R3-40R3G1CN4-40R3G1CN5-43R3-43R3G1CN4-43R3G1CN5-49R3-49R3G1CN4-49R3G1CN5|59R3-844-1031	299897000	165723000	134174000	31549000	30
454	454T1	'09/3534	'982009104872692	Matched	Clade_A1	Clade_A1-3A	DFT1_3	DFT1_3A	1828A>G;3255G>A	Forestier	-42.902220999999997	147.83382900000001	2009	Unknown	DFT1	Tissue	No	Yes	Yes	Unknown				Singleton		0.89600000000000002	Not Available	0.92200000000000004	0.89600000000000002	No	Yes	M	3	No data (confirmed)			20	9	11	1R1_2R1_3R1_4R1_5_6_7_8_9_10R1_11_12_13_15_19_23_24_33_209_210	6	1	5	1R1-7-8|2R1-3R1-5-6-9-10R1-11-15-19|4R1-12-13|23-24|33|209-210	280600000	159900000	120700000	39200000	20
455	455T1	'09/3564	'982009100373762	Matched	Clade_A1	Clade_A1-3A	DFT1_3	DFT1_3A	1828A>G;3255G>A	Forestier	-42.902220999999997	147.83382900000001	2009	30/09/2009	DFT1	Tissue	No	Yes	Yes	Unknown				Singleton		0.33300000000000002	Not Available	0.50600000000000001	0.33300000000000002	No	Yes	F	4	No data (confirmed)			18	9	9	1R1_2R1_3R1_4R1_5_6_7_8_9_10R1_11_12_13_15_19_23_24_33	5	1	4	1R1-7-8|2R1-3R1-5-6-9-10R1-11-15-19|4R1-12-13|23-24|33	277900000	159900000	118000000	41900000	18
456	456T1	'09/4358	'982009104234503	Matched	Clade_A1	Clade_A1-3A2	DFT1_3	DFT1_3A2a1	1828A>G;2731A>G;3255G>A;3430T>A;4311G>A	Forestier	-42.902220999999997	147.83382900000001	2009	Unknown	DFT1	Tissue	No	Yes	Yes	Unknown				Singleton		0.91100000000000003	Not Available	0.93100000000000005	0.91100000000000003	No	Yes	F	2	Strain 2			17	9	8	1R1_2R1_3R1_4R1_5_6_7_8_9_10R1_11_12_13_15_19_23_24	4	1	3	1R1-7-8|2R1-3R1-5-6-9-10R1-11-15-19|4R1-12-13|23-24	276200000	159900000	116300000	43600000	17
457	457T1	'09/4428	'982009104867065	Matched	Clade_A1	Clade_A1-3A2	DFT1_3	DFT1_3A2a1	1828A>G;2731A>G;3255G>A;3430T>A;4311G>A	Forestier	-42.902220999999997	147.83382900000001	2009	26/11/2009	DFT1	Tissue	No	Yes	Yes	Unknown				Singleton		0.53	Not Available	0.85099999999999998	0.53	No	Yes	F	3	Strain 3 tetraploid			17	9	8	1R1_2R1_3R1_4R1_5_6_7_8_9_10R1_11_12_13_15_19_23_24	4	1	3	1R1-7-8|2R1-3R1-5-6-9-10R1-11-15-19|4R1-12-13|23-24	276200000	159900000	116300000	43600000	17
458	458T1	'12/3045	'982000123208272	Matched	Clade_A1	Clade_A1-3A2	DFT1_3	DFT1_3A2a1	1828A>G;2731A>G;3255G>A;3430T>A;4311G>A	Forestier	-42.902220999999997	147.83382900000001	2012	Unknown	DFT1	Tissue	No	Yes	Yes	Unknown				Singleton		0.83899999999999997	Not Available	0.91600000000000004	0.83899999999999997	No	Yes	F	2	Strain 3			18	9	9	1R1_2R1_3R1_4R1_5_6_7_8_9_10R1_11_12_13_15_19_23_24_871	5	1	4	1R1-7-8|2R1-3R1-5-6-9-10R1-11-15-19|4R1-12-13|23-24|871	277100000	159900000	117200000	42700000	18
460	460T1	'14/3287	Unknown	Matched	Clade_A2	Clade_A2-5	DFT1_20	DFT1_20	15049T>C	Low Head	-41.058000999999997	146.83275	2014	Unknown	DFT1	Tissue	No	No (missing data)	Yes	Unknown				Singleton		0.91700000000000004	Not Available	0.94299999999999995	0.91700000000000004	No	Yes	M	3	Strain 2			18	9	9	1R1_2R1_3R1_4R1_5_6_7_8_9_10R1_11_12_13_15_19_22_26_27R1	5	1	4	1R1-7-8|2R1-3R1-5-6-9-10R1-11-15-19|4R1-12-13|22|26-27R1	242100000	159900000	82200000	77700000	18
461	461T	Unknown	'982009106307588	Unmatched	Clade_B	Clade_B-9	DFT1_2	DFT1_2	14114C>T	Narawntapu	-41.139961999999997	146.64416399999999	2014	11/04/2014	DFT1	Tissue	No	Yes	Yes	Facial/oral	Right front of face below nose			Singleton		0.34200000000000003	Not Available	0.79300000000000004	0.34200000000000003	No	Yes	F	2	No data (confirmed)			18	9	9	1R1_2R1_3R1_4R1_5_6_7_8_9_10R1_11_12_13_15_19_20R1_21R1_25	6	1	5	1R1-7-8|2R1-3R1-5-6-9-10R1-11-15-19|4R1-12-13|20R1|21R1|25	225000000	159900000	65100000	94800000	18
462	462T1	Unknown	'982009106545752	Matched	Clade_B	Clade_B-9	DFT1_2	DFT1_2	14114C>T	Narawntapu	-41.139961999999997	146.64416399999999	2014	13/04/2014	DFT1	Tissue	No	Yes	Yes	Facial/oral	Lower jaw near mandible			Multiple		0.67900000000000005	Not Available	0.871	0.67900000000000005	No	Yes	M	3	No data (confirmed)			18	9	9	1R1_2R1_3R1_4R1_5_6_7_8_9_10R1_11_12_13_15_19_20R1_21R1_25	6	1	5	1R1-7-8|2R1-3R1-5-6-9-10R1-11-15-19|4R1-12-13|20R1|21R1|25	225000000	159900000	65100000	94800000	18
462	462T2	Unknown	'982009106545752	Matched	Clade_B	Clade_B-9	DFT1_2	DFT1_2	14114C>T	Narawntapu	-41.139961999999997	146.64416399999999	2014	13/04/2014	DFT1	Tissue	No	Yes	Yes	Facial/oral	Upper left lip			Multiple		0.72799999999999998	Not Available	0.8	0.72799999999999998	No	Yes	M	3	No data (confirmed)			18	9	9	1R1_2R1_3R1_4R1_5_6_7_8_9_10R1_11_12_13_15_19_20R1_21R1_25	6	1	5	1R1-7-8|2R1-3R1-5-6-9-10R1-11-15-19|4R1-12-13|20R1|21R1|25	225000000	159900000	65100000	94800000	18
462	462T3	Unknown	'982009106545752	Matched	Clade_B	Clade_B-9	DFT1_2	DFT1_2	14114C>T	Narawntapu	-41.139961999999997	146.64416399999999	2014	13/04/2014	DFT1	Tissue	No	Yes	Yes	Facial/oral	Lower jaw near throat			Multiple		0.77200000000000002	Not Available	0.81399999999999995	0.77200000000000002	No	Yes	M	3	No data (confirmed)			18	9	9	1R1_2R1_3R1_4R1_5_6_7_8_9_10R1_11_12_13_15_19_20R1_21R1_25	6	1	5	1R1-7-8|2R1-3R1-5-6-9-10R1-11-15-19|4R1-12-13|20R1|21R1|25	225000000	159900000	65100000	94800000	18
463	463T1	Unknown	'900006000170359	Matched	Clade_C	Clade_C-2	DFT1_29	DFT1_29	16143G>A	Takone	-41.162607999999999	145.63892799999999	2014	08/05/2014	DFT1	Tissue	No	Yes (italicised)	Yes	Facial/oral	Left side of face near nose			Multiple		0.14599999999999999	Not Available	0.47099999999999997	0.14599999999999999	No	No	M	2	No data (confirmed)	No data
463	463T2	Unknown	'900006000170359	Matched	Clade_C	Clade_C-3	DFT1_5	DFT1_5	2681C>T	Takone	-41.162607999999999	145.63892799999999	2014	08/05/2014	DFT1	Tissue	No	Yes	Yes	Facial/oral	Upper front left lip			Multiple		0.8	Not Available	0.77500000000000002	0.8	No	Yes	M	2	No data (confirmed)			16	9	7	1R1_2R1_3R1_4R1_5_6_7_8_9_10R1_11_12_13_15_19_904	4	1	3	1R1-7-8|2R1-3R1-5-6-9-10R1-11-15-19|4R1-12-13|904	238200000	159900000	78300000	81600000	16
463	463T3	Unknown	'900006000170359	Matched	Clade_C	Clade_C-2	DFT1_29	DFT1_29	16143G>A	Takone	-41.162607999999999	145.63892799999999	2014	08/05/2014	DFT1	Tissue	No	Yes (italicised)	Yes	Facial/oral	Lower left lip			Multiple		0.36399999999999999	Not Available	0.67100000000000004	0.36399999999999999	No	Yes	M	2	No data (confirmed)	M5 loss		26	11	15	1R1_2R1_3R1_4R1_5_6_6BM30_7_8_9_10R1_11_11BM30_12_13_15_16R30_17R30_18R30_19_834R2_837R1_845_968_1850_1851	6	2	4	1R1-7-8|2R1-3R1-5-6-9-10R1-11-15-19|4R1-12-13|6BM30-11BM30-16R30-17R30-18R30|834R2-968|837R1-845-1850-1851	279507000	201300000	78207000	123093000	26
463	463T4	Unknown	'900006000170359	Matched	Clade_C	Clade_C-3	DFT1_5	DFT1_5	2681C>T	Takone	-41.162607999999999	145.63892799999999	2014	08/05/2014	DFT1	Tissue	No	Yes	Yes	Facial/oral	Lower left jaw near lip			Multiple		0.20399999999999999	Not Available	0.58099999999999996	0.20399999999999999	No	Yes	M	2	No data (confirmed)			16	9	7	1R1_2R1_3R1_4R1_5_6_7_8_9_10R1_11_12_13_15_19_904	4	1	3	1R1-7-8|2R1-3R1-5-6-9-10R1-11-15-19|4R1-12-13|904	238200000	159900000	78300000	81600000	16
464	464T1	Unknown	'900006000171526	Matched	Clade_C	Clade_C-3	DFT1_5	DFT1_5	2681C>T	Takone	-41.162607999999999	145.63892799999999	2014	07/05/2014	DFT1	Tissue	No	Yes	Yes	Facial/oral	Front upper lip			Multiple		0.625	Not Available	0.77	0.625	No	Yes	F	2	No data (confirmed)	M5 loss		21	9	12	1R1_2R1_3R1_4R1_5_6_6BM33_7_8_9_10R1_11_11BM33_12_13_15_16R33_17R33_18R33_19_943	5	1	4	1R1-7-8|2R1-3R1-5-6-9-10R1-11-15-19|4R1-12-13|6BM33-11BM33-16R33-17R33-18R33|943	220107000	159900000	60207000	99693000	21
464	464T2	Unknown	'900006000171526	Matched	Clade_C	Clade_C-3	DFT1_5	DFT1_5	2681C>T	Takone	-41.162607999999999	145.63892799999999	2014	07/05/2014	DFT1	Tissue	No	Yes	Yes	Facial/oral	Right upper lip			Multiple		0.59	Not Available	0.79500000000000004	0.59	No	Yes	F	2	No data (confirmed)	M5 loss		21	9	12	1R1_2R1_3R1_4R1_5_6_6BM33_7_8_9_10R1_11_11BM33_12_13_15_16R33_17R33_18R33_19_943	5	1	4	1R1-7-8|2R1-3R1-5-6-9-10R1-11-15-19|4R1-12-13|6BM33-11BM33-16R33-17R33-18R33|943	220107000	159900000	60207000	99693000	21
465	465T1	Unknown	'982000123131193	Matched	Clade_C	Clade_C-3	DFT1_5	DFT1_5	2681C>T	Takone	-41.162607999999999	145.63892799999999	2014	04/05/2014	DFT1	Tissue	No	Yes	Yes	Facial/oral	Right side of face on lower jaw			Singleton		0.624	Not Available	0.83299999999999996	0.624	No	Yes	M	3	No data (confirmed)	M5 loss		21	9	12	1R1_2R1_3R1_4R1_5_6_6BM33_7_8_9_10R1_11_11BM33_12_13_15_16R33_17R33_18R33_19_993	5	1	4	1R1-7-8|2R1-3R1-5-6-9-10R1-11-15-19|4R1-12-13|6BM33-11BM33-16R33-17R33-18R33|993	247807000	159900000	87907000	71993000	21
469	469T1	Unknown	'982009106585954	Matched	Clade_B	Clade_B-8	DFT1_2	DFT1_2	14114C>T	Bronte Park	-42.124875000000003	146.46679	2014	24/05/2014	DFT1	Tissue	No	Yes (italicised)	Yes	Facial/oral	Left side of face near nose			Singleton		0.67700000000000005	Not Available	0.78100000000000003	0.67700000000000005	No	Yes	F	2	No data (confirmed)			18	9	9	1R1_2R1_3R1_4R1_5_6_7_8_9_10R1_11_12_13_15_19_20R1_21R1_25	6	1	5	1R1-7-8|2R1-3R1-5-6-9-10R1-11-15-19|4R1-12-13|20R1|21R1|25	225000000	159900000	65100000	94800000	18
470	470T1	Unknown	'982009106589216	Matched	Clade_B	Clade_B-8	DFT1_2	DFT1_2	14114C>T	Bronte Park	-42.124875000000003	146.46679	2014	26/05/2014	DFT1	Tissue	No	Yes (italicised)	Yes	Facial/oral	Upper left jaw			Singleton		0.84899999999999998	Not Available	0.89700000000000002	0.84899999999999998	No	Yes	F	2	No data (confirmed)			18	9	9	1R1_2R1_3R1_4R1_5_6_7_8_9_10R1_11_12_13_15_19_20R1_21R1_25	6	1	5	1R1-7-8|2R1-3R1-5-6-9-10R1-11-15-19|4R1-12-13|20R1|21R1|25	225000000	159900000	65100000	94800000	18
471	471T1	Unknown	'982000191010994	Matched	Clade_B	Clade_B-2	DFT1_13	DFT1_13A	4201T>C;10069A>G	Kempton	-42.525894000000001	147.20354900000001	2014	24/05/2014	DFT1	Tissue	No	Yes	Yes	Facial/oral	Left upper lip			Multiple		0.69399999999999995	Not Available	0.85399999999999998	0.69399999999999995	No	Yes	F	3	No data (confirmed)			16	9	7	1R1_2R1_3R1_4R1_5_6_7_8_9_10R1_11_12_13_15_19_842	4	1	3	1R1-7-8|2R1-3R1-5-6-9-10R1-11-15-19|4R1-12-13|842	211500000	159900000	51600000	108300000	16
471	471T2	Unknown	'982000191010994	Matched	Clade_B	Clade_B-3	DFT1_7	DFT1_7A2	2707G>A;8529G>A;6308T>C	Kempton	-42.525894000000001	147.20354900000001	2014	24/05/2014	DFT1	Tissue	No	Yes	Yes	Facial/oral	Right side of face below eye			Multiple		0.88400000000000001	0.90600000000000003	0.92700000000000005	0.89500000000000002	Yes	Yes	F	3	No data (confirmed)			24	13	11	1R1_2R1_3R1_4R1_5_6_7_8_9_10R1_11_12_13_15_19_20R1_47R1_51R3_57_58_100_112_113_1035	6	2	4	1R1-7-8|2R1-3R1-5-6-9-10R1-11-15-19|4R1-12-13|20R1|47R1-51R3-57-58|100-112-113-1035	274391573	170791573	103600000	67191573	24
472	472T5	Unknown	'982000191016500	Matched	Clade_B	Clade_B-3	DFT1_7	DFT1_7A2	2707G>A;8529G>A;6308T>C	Kempton	-42.525894000000001	147.20354900000001	2014	25/05/2014	DFT1	Tissue	No	Yes	Yes	Skin	Right hind leg posterior			Singleton		0.751	0.76900000000000002	0.79600000000000004	0.76	Yes	Yes	F	3	No data (confirmed)			25	13	12	1R1_2R1_3R1_4R1_5_6_7_8_9_10R1_11_12_13_15_19_20R1_47R1_51R3_57_58_100_112_113_918_1035	7	2	5	1R1-7-8|2R1-3R1-5-6-9-10R1-11-15-19|4R1-12-13|20R1|47R1-51R3-57-58|100-112-113-1035|918	275991573	170791573	105200000	65591573	25
473	473T1	Unknown	'982000190529814	Matched	Clade_B	Clade_B-6	DFT1_0	DFT1_0	Novariants	Fentonbury	-42.653722000000002	146.76054099999999	2014	18/06/2014	DFT1	Tissue	No	Yes	Yes	Facial/oral	Left side of face near corner of mouth			Multiple		0.22500000000000001	Not Available	0.435	0.22500000000000001	No	Yes	M	3	No data (confirmed)			19	9	10	1R1_2R1_3R1_4R1_5_6_7_8_9_10R1_11_12_13_15_19_20R1_21R1_25_50	7	1	6	1R1-7-8|2R1-3R1-5-6-9-10R1-11-15-19|4R1-12-13|20R1|21R1|25|50	236100000	159900000	76200000	83700000	19
473	473T3	Unknown	'982000190529814	Matched	Clade_B	Clade_B-6	DFT1_0	DFT1_0	Novariants	Fentonbury	-42.653722000000002	146.76054099999999	2014	18/06/2014	DFT1	Tissue	No	Yes	Yes	Facial/oral	Right side of face below eye			Multiple		0.93500000000000005	0.93799999999999994	Not Available	0.9365	Yes	Yes	M	3	No data (confirmed)			19	9	10	1R1_2R1_3R1_4R1_5_6_7_8_9_10R1_11_12_13_15_19_20R1_21R1_25_50	7	1	6	1R1-7-8|2R1-3R1-5-6-9-10R1-11-15-19|4R1-12-13|20R1|21R1|25|50	236100000	159900000	76200000	83700000	19
474	474T1	Unknown	'982009106680871	Unmatched	Clade_B	Clade_B-6	DFT1_0	DFT1_0	Novariants	Fentonbury	-42.653722000000002	146.76054099999999	2014	14/06/2014	DFT1	Tissue	No	Yes	Yes	Facial/oral	right side of face			Singleton		0.54500000000000004	Not Available	0.72199999999999998	0.54500000000000004	No	Yes	F	2	No data (confirmed)			19	9	10	1R1_2R1_3R1_4R1_5_6_7_8_9_10R1_11_12_13_15_19_20R1_21R1_25_50	7	1	6	1R1-7-8|2R1-3R1-5-6-9-10R1-11-15-19|4R1-12-13|20R1|21R1|25|50	236100000	159900000	76200000	83700000	19
475	475T2	Unknown	'982000123120536	Unmatched	Clade_B	Clade_B-5	DFT1_2	DFT1_2	14114C>T	Buckland	-42.613394	147.70647	2014	29/06/2014	DFT1	Tissue	No	Yes (italicised)	Yes	Facial/oral	Lower left jaw near lip			Multiple		0.65900000000000003	Not Available	0.83799999999999997	0.65900000000000003	No	Yes	F	2	No data (confirmed)			18	9	9	1R1_2R1_3R1_4R1_5_6_7_8_9_10R1_11_12_13_15_19_20R1_21R1_25	6	1	5	1R1-7-8|2R1-3R1-5-6-9-10R1-11-15-19|4R1-12-13|20R1|21R1|25	225000000	159900000	65100000	94800000	18
475	475T4	Unknown	'982000123120536	Unmatched	Clade_B	Clade_B-5	DFT1_2	DFT1_2	14114C>T	Buckland	-42.613394	147.70647	2014	29/06/2014	DFT1	Tissue	No	Yes	Yes	Neck	Lower left side of face near throat			Multiple		0.97	0.94199999999999995	0.93300000000000005	0.95599999999999996	Yes	Yes	F	2	No data (confirmed)			19	9	10	1R1_2R1_3R1_4R1_5_6_7_8_9_10R1_11_12_13_15_19_20R1_21R1_25_878	7	1	6	1R1-7-8|2R1-3R1-5-6-9-10R1-11-15-19|4R1-12-13|20R1|21R1|25|878	226400000	159900000	66500000	93400000	19
476	476T2	Unknown	'982000356669378	Unmatched	Clade_A2	Clade_A2-5	DFT1_0	DFT1_0	Novariants	Stony Head	-41.014394000000003	147.013229	2014	22/06/2014	DFT1	Tissue	No	Yes	Yes	Skin	Tail			Multiple		0.376	Not Available	Not Available	0.376	No	Yes	F	3	No data (confirmed)	M5 loss	Tetraploid (4)	28	12	16	1R1_2R1_3R1_4R1_5_6_6BM13_7_8_9_10R1_11_11BM13_12_13_15_16R13_17R13_18R13_19_22_26_27R1_40R1_43R1_49R1_60_110	8	2	6	1R1-7-8|2R1-3R1-5-6-9-10R1-11-15-19|4R1-12-13|6BM13-11BM13-16R13-17R13-18R13-60|22|26-27R1|40R1-43R1-49R1|110	258848000	161841000	97007000	64834000
476	476T3	Unknown	'982000356669378	Unmatched	Clade_A2	Clade_A2-5	DFT1_0	DFT1_0	Novariants	Stony Head	-41.014394000000003	147.013229	2014	22/06/2014	DFT1	Tissue	No	Yes	Yes	Facial/oral	Lower left jaw			Multiple		0.36499999999999999	Not Available	Not Available	0.36499999999999999	No	Yes	F	3	No data (confirmed)	M5 loss	Tetraploid (4)	31	15	16	1R1_2R1_3R1_4R1_5_6_6BM13_7_8_9_10R1_11_11BM13_12_13_15_16R13_17R13_18R13_19_22_26_27R1_40R1_43R1_49R1_60_110_953R2_276R2_1029R4	9	3	6	1R1-7-8|2R1-3R1-5-6-9-10R1-11-15-19|4R1-12-13|6BM13-11BM13-16R13-17R13-18R13-60|22|26-27R1|40R1-43R1-49R1|110|276R2-953R2-1029R4	425248000	328241000	97007000	231234000
477	477T2	Unknown	'982000356675708	Matched	Clade_A2	Clade_A2-5	DFT1_0	DFT1_0	Novariants	Stony Head	-41.014394000000003	147.013229	2014	22/06/2014	DFT1	Tissue	No	Yes	Yes	Facial/oral	Lower left jaw near lip			Multiple		0.75700000000000001	Not Available	Not Available	0.75700000000000001	No	Yes	M	3	No data (confirmed)	M5 loss	Tetraploid (4)	24	9	15	1R1_2R1_3R1_4R1_5_6_6BM13_7_8_9_10R1_11_11BM13_12_13_15_16R13_17R13_18R13_19_22_26_27R1_60	6	1	5	1R1-7-8|2R1-3R1-5-6-9-10R1-11-15-19|4R1-12-13|6BM13-11BM13-16R13-17R13-18R13-60|22|26-27R1	251707000	159900000	91807000	68093000
477	477T3	Unknown	'982000356675708	Matched	Clade_A2	Clade_A2-5	DFT1_0	DFT1_0	Novariants	Stony Head	-41.014394000000003	147.013229	2014	22/06/2014	DFT1	Tissue	No	Yes	Yes	Facial/oral	Lower right jaw			Multiple		0.95899999999999996	0.95499999999999996	Not Available	0.95699999999999996	Yes	Yes	M	3	No data (confirmed)	M5 loss	Tetraploid (4)	31	12	19	1R1_2R1_3R1_4R1_5_6_6BM13_7_8_9_10R1_11_11BM13_12_13_15_16R13_17R13_18R13_19_22_26_27R1_40R1_43R1_49R1_60_94_110_846_1005	9	2	7	1R1-7-8|2R1-3R1-5-6-9-10R1-11-15-19|4R1-12-13|6BM13-11BM13-16R13-17R13-18R13-60|22|26-27R1|40R1-43R1-49R1|94-846-1005|110	261648000	161841000	99807000	62034000
477	477T4	Unknown	'982000356675708	Matched	Clade_A2	Clade_A2-5	DFT1_0	DFT1_0	Novariants	Stony Head	-41.014394000000003	147.013229	2014	22/06/2014	DFT1	Tissue	No	Yes	Yes	Facial/oral	right side of face			Multiple		0.97699999999999998	0.98399999999999999	Not Available	0.98050000000000004	Yes	Yes	M	3	No data (confirmed)	M5 loss	Tetraploid (4)	27	12	15	1R1_2R1_3R1_4R1_5_6_6BM13_7_8_9_10R1_11_11BM13_12_13_15_16R13_17R13_18R13_19_22_26_27R1_40R1_43R1_49R1_60	7	2	5	1R1-7-8|2R1-3R1-5-6-9-10R1-11-15-19|4R1-12-13|6BM13-11BM13-16R13-17R13-18R13-60|22|26-27R1|40R1-43R1-49R1	253648000	161841000	91807000	70034000
477	477T5	Unknown	'982000356675708	Matched	Clade_A2	Clade_A2-5	DFT1_0	DFT1_0	Novariants	Stony Head	-41.014394000000003	147.013229	2014	22/06/2014	DFT1	Tissue	No	Yes	Yes	Neck	Neck dorsal behind right ear			Multiple		0.77	Not Available	Not Available	0.77	No	Yes	M	3	No data (confirmed)	M5 loss	Tetraploid (4)	28	12	16	1R1_2R1_3R1_4R1_5_6_6BM13_7_8_9_10R1_11_11BM13_12_13_15_16R13_17R13_18R13_19_22_26_27R1_40R1_43R1_49R1_60_110	8	2	6	1R1-7-8|2R1-3R1-5-6-9-10R1-11-15-19|4R1-12-13|6BM13-11BM13-16R13-17R13-18R13-60|22|26-27R1|40R1-43R1-49R1|110	258848000	161841000	97007000	64834000
478	478T2	Unknown	'982000356483242	Matched (MIPs Only)	Clade_A2	Clade_A2-5	DFT1_0	DFT1_0	Novariants	Stony Head	-41.014394000000003	147.013229	2014	22/06/2014	DFT1	Tissue	No	No (missing data)	Yes	Unknown				Singleton		9.6000000000000002E-2	0.128	Not Available	0.112	No	No	M	3	No data (confirmed)	No data	Tetraploid (4)
480	480T1	Unknown	'982009106485186	Matched	Clade_B	Clade_B-9	DFT1_2	DFT1_2	14114C>T	Narawntapu	-41.139961999999997	146.64416399999999	2015	Unknown	DFT1	Tissue	No	Yes (italicised)	Yes	Skin	Shoulder			Singleton		0.85699999999999998	Not Available	0.87	0.85699999999999998	No	Yes	M	2	No data (confirmed)			25	9	16	1R1_2R1_2R1BM40_3R1_3R1BM40_4R1_5_6_7_8_9_9BM40_10R1_10R1BM40_11_12_13_15_15BM40_16R40_19_20R1_21R1_25_929	8	1	7	1R1-7-8|2R1-3R1-5-6-9-10R1-11-15-19|2R1BM40-3R1BM40-9BM40-10R1BM40-15BM40-16R40|4R1-12-13|20R1|21R1|25|929	380000000	159900000	220100000	-60200000	15
493	493T1	'16/2158	'982000190525865	Matched	Clade_C	Clade_C-3	DFT1_5	DFT1_5	2681C>T	Granville Harbour	-41.805917999999998	145.04102599999999	2016	19/05/2016	DFT1	Tissue	No	Yes	Yes	Facial/oral	left side of face			Multiple		0.80700000000000005	0.68400000000000005	0.35499999999999998	0.74550000000000005	Yes	Yes	M	3	No data	M5 loss	Tetraploid (9)	29	12	17	1R1_2R1_3R1_4R1_5_6_6BM34_7_8_9_10R1_11_11BM34_12_13_15_16R34_17R34_18R34_19_52R2_53R1_61R1_62_68_97_104_345R1_823	8	3	5	1R1-7-8|2R1-3R1-5-6-9-10R1-11-15-19|4R1-12-13|6BM34-11BM34-16R34-17R34-18R34|52R2-53R1-61R1-68-823|62|97-104|345R1	852107000	784800000	67307000	717493000
493	493T2	'16/2158	'982000190525865	Matched	Clade_C	Clade_C-3	DFT1_5	DFT1_5	2681C>T	Granville Harbour	-41.805917999999998	145.04102599999999	2016	19/05/2016	DFT1	Tissue	No	Yes	Yes	Facial/oral	Lower front lip			Multiple		0.80300000000000005	0.77800000000000002	0.79800000000000004	0.79049999999999998	Yes	Yes	M	3	No data		Tetraploid (9)	21	9	12	1R1_2R1_3R1_4R1_5_6_7_8_9_10R1_11_12_13_15_19_52R2_53R1_61R1_62_68_823	5	1	4	1R1-7-8|2R1-3R1-5-6-9-10R1-11-15-19|4R1-12-13|52R2-53R1-61R1-68-823|62	219000000	159900000	59100000	100800000
499	499T1	'16/2161	'982000190609582	Matched	Clade_C	Clade_C-3	DFT1_5	DFT1_5	2681C>T	Granville Harbour	-41.805917999999998	145.04102599999999	2016	19/05/2016	DFT1	Tissue	No	Yes	Yes	Facial/oral	Right side lower jaw ventral to ear			Singleton		0.34499999999999997	0.33600000000000002	0.5	0.34050000000000002	Yes	Yes	M	3	No data		Tetraploid (9)	26	13	13	1R1_2R1_3R1_4R1_5_6_7_8_9_10R1_11_12_13_15_19_52R2_53R1_61R1_62_68_607R2_607R2G1CN4_608_608G1CN4_823_1852	7	2	5	1R1-7-8|2R1-3R1-5-6-9-10R1-11-15-19|4R1-12-13|52R2-53R1-61R1-68-823|62|607R2-607R2G1CN4-608-608G1CN4|1852	262300000	164300000	98000000	66300000
513	513T1	Unknown	'982000191016743	Matched	Clade_C	Clade_C-3	DFT1_5	DFT1_5	2681C>T	Granville Harbour	-41.805917999999998	145.04102599999999	2017	19/05/2017	DFT1	Tissue	No	Yes	Yes	Facial/oral	Front left jaw			Singleton		0.91900000000000004	Not Available	0.89100000000000001	0.91900000000000004	No	Yes	F	2	No data	M5 loss	Tetraploid (9)	29	12	17	1R1_2R1_3R1_4R1_5_6_6BM34_7_8_9_10R1_11_11BM34_12_13_15_16R34_17R34_18R34_19_52R2_53R1_61R1_62_68_97_104_345R1_823	8	3	5	1R1-7-8|2R1-3R1-5-6-9-10R1-11-15-19|4R1-12-13|6BM34-11BM34-16R34-17R34-18R34|52R2-53R1-61R1-68-823|62|97-104|345R1	852107000	784800000	67307000	717493000
528	528T1	'16/2157	'982009106151231; 982000363360184	Matched	Clade_C	Clade_C-3	DFT1_5	DFT1_5C	2681C>T;2753G>A	Granville Harbour	-41.805917999999998	145.04102599999999	2016	22/05/2016	DFT1	Tissue	No	Yes	Yes	Facial/oral	Lower left lip			Multiple		0.47499999999999998	0.41699999999999998	0.497	0.44600000000000001	Yes	Yes	F	3	No data (confirmed)	M5 loss	Tetraploid (9)	28	11	17	1R1_2R1_3R1_4R1_5_6_6BM34_7_8_9_10R1_11_11BM34_12_13_15_16R34_17R34_18R34_19_52R2_53R1_61R1_62_68_97_104_823	7	2	5	1R1-7-8|2R1-3R1-5-6-9-10R1-11-15-19|4R1-12-13|6BM34-11BM34-16R34-17R34-18R34|52R2-53R1-61R1-68-823|62|97-104	333007000	265700000	67307000	198393000
528	528T2	'16/2157	'982009106151231; 982000363360184	Matched	Clade_C	Clade_C-3	DFT1_5	DFT1_5	2681C>T	Granville Harbour	-41.805917999999998	145.04102599999999	2016	22/05/2016	DFT1	Tissue	No	Yes	Yes	Facial/oral	Lower right side of face			Multiple		0.97	0.96699999999999997	0.90500000000000003	0.96850000000000003	Yes	Yes	F	3	No data	M5 loss	Tetraploid (9)	29	12	17	1R1_2R1_3R1_4R1_5_6_6BM34_7_8_9_10R1_11_11BM34_12_13_15_16R34_17R34_18R34_19_52R2_53R1_61R1_62_68_97_104_345R1_823	8	3	5	1R1-7-8|2R1-3R1-5-6-9-10R1-11-15-19|4R1-12-13|6BM34-11BM34-16R34-17R34-18R34|52R2-53R1-61R1-68-823|62|97-104|345R1	852107000	784800000	67307000	717493000
540	540T1	Unknown	'982009106211869	Matched	Clade_C	Clade_C-3	DFT1_5	DFT1_5	2681C>T	Granville Harbour	-41.805917999999998	145.04102599999999	2015	29/05/2015	DFT1	Tissue	No	Yes	Yes	Facial/oral	Right side lower jaw			Multiple		0.79500000000000004	Not Available	0.81499999999999995	0.79500000000000004	No	Yes	M	3	No data	M5 loss	Tetraploid (9)	26	9	17	1R1_2R1_3R1_4R1_5_6_6BM34_7_8_9_10R1_11_11BM34_12_13_15_16R34_17R34_18R34_19_52R2_53R1_61R1_62_68_823	6	1	5	1R1-7-8|2R1-3R1-5-6-9-10R1-11-15-19|4R1-12-13|6BM34-11BM34-16R34-17R34-18R34|52R2-53R1-61R1-68-823|62	227207000	159900000	67307000	92593000
540	540T4	Unknown	'982009106211869	Matched	Clade_C	Clade_C-3	DFT1_5	DFT1_5	2681C>T	Granville Harbour	-41.805917999999998	145.04102599999999	2015	29/05/2015	DFT1	Tissue	No	Yes	Yes	Facial/oral	Lower right lip			Multiple		0.88600000000000001	Not Available	0.93600000000000005	0.88600000000000001	No	Yes	M	3	No data	M5 loss	Tetraploid (9)	28	11	17	1R1_2R1_3R1_4R1_5_6_6BM34_7_8_9_10R1_11_11BM34_12_13_15_16R34_17R34_18R34_19_52R2_53R1_61R1_62_68_97_104_823	7	2	5	1R1-7-8|2R1-3R1-5-6-9-10R1-11-15-19|4R1-12-13|6BM34-11BM34-16R34-17R34-18R34|52R2-53R1-61R1-68-823|62|97-104	333007000	265700000	67307000	198393000
610	610T1	Unknown	'982009106499858	Matched	Clade_B	Clade_B-8	DFT1_2	DFT1_2	14114C>T	Bronte Park	-42.124875000000003	146.46679	2015	15/05/2015	DFT1	Tissue	No	Yes	Yes	Facial/oral	Right side lower jaw			Singleton		0.72499999999999998	Not Available	0.77	0.72499999999999998	No	Yes	M	2	No data (confirmed)			30	21	9	1R1_2R1_3R1_4R1_5_6_7_8_9_10R1_11_12_12BM2_13_13BM1_15_19_20R1_21R1_25_37R38_89_89G1CN4_111_111G1CN4_120R38_150R1_879_900_1831R3	8	3	5	1R1-7-8|2R1-3R1-5-6-9-10R1-11-15-19|4R1-12-13|12BM2-13BM1-37R38-120R38-150R1-879-900-1831R3|20R1|21R1|25|89-89G1CN4-111-111G1CN4	753400000	688300000	65100000	623200000	21
614	614T1	'05/2531	Unknown	Unmatched	Clade_B	Clade_B-4	DFT1_4	DFT1_4	7198T>C	Fentonbury	-42.653722000000002	146.76054099999999	2005	Unknown	DFT1	Cell-Line	No	Yes	Yes	Unknown				Singleton		0.95799999999999996	1.0109999999999999	0.96399999999999997	0.98450000000000004	Yes	Yes	F	Unknown	Strain 2	M5 loss		29	13	16	1R1_2R1_2R1BM18_3R1_3R1BM18_4R1_5_6_6BM25_7_8_9_9BM18_10R1_10R1BM18_11_11BM25_12_13_15_15BM18_16R25_19_20R1_25_36R18_69R1_270_812	7	2	5	1R1-7-8|2R1-3R1-5-6-9-10R1-11-15-19|2R1BM18-3R1BM18-6BM25-9BM18-10R1BM18-11BM25-15BM18-16R25|4R1-12-13|20R1|25|36R18-69R1-270-812	580500000	368600000	211900000	156700000	29
615	615T1	'05/2748	'982009100874204	Unmatched	Clade_B	Clade_B-8	DFT1_2	DFT1_2	14114C>T	Bronte Park	-42.124875000000003	146.46679	2005	Unknown	DFT1	Cell-Line	No	Yes	Yes	Unknown				Singleton		0.93200000000000005	0.97399999999999998	0.95699999999999996	0.95299999999999996	Yes	Yes	F	1	Strain 2			29	15	14	1R1_2R1_2R1BM22_3R1_3R1BM22_4R1_5_6_7_8_9_9BM22_10R1_10R1BM22_11_12_13_15_15BM22_19_20R1_21R1_25_34R22_35R22_36R22_37R22_38R22_39R22	8	2	6	1R1-7-8|2R1-3R1-5-6-9-10R1-11-15-19|2R1BM22-3R1BM22-9BM22-10R1BM22-15BM22|4R1-12-13|20R1|21R1|25|34R22-35R22-36R22-37R22-38R22-39R22	457400000	239800000	217600000	22200000	29
617	617T1	'06/1645	Unknown	Unmatched	Clade_C	Clade_C-2	DFT1_0	DFT1_0	Novariants	Kimberley	-41.398634999999999	146.49255099999999	2006	Unknown	DFT1	Cell-Line	No	Yes	Yes	Unknown				Singleton		0.97099999999999997	1.0129999999999999	Not Available	0.99199999999999999	Yes	Yes	F	3	Strain 2	M5 loss		28	11	17	1R1_2R1_2R1BM23_3R1_3R1BM23_4R1_5_6_6BM32_7_8_9_9BM23_10R1_10R1BM23_11_11BM32_12_13_15_15BM23_16R32_17R32_18R32_19_37R23_120R23_954	5	2	3	1R1-7-8|2R1-3R1-5-6-9-10R1-11-15-19|2R1BM23-3R1BM23-6BM32-9BM23-10R1BM23-11BM32-15BM23-16R32-17R32-18R32-954|4R1-12-13|37R23-120R23	623307000	410600000	212707000	197893000	28
618	618T1	'06/1857	Unknown	Unmatched	Clade_C	Clade_C-2	DFT1_0	DFT1_0	Novariants	Railton	-41.329225999999998	146.408277	2006	Unknown	DFT1	Cell-Line	No	Yes	Yes	Unknown				Singleton		0.98599999999999999	1.016	0.253	1.0009999999999999	Yes	Yes	M	Unknown	Strain 2	M5 loss		33	18	15	1R1_2R1_2R1BM24_3R1_4R1_5_6_6BM31_7_8_9_10R1_11_11BM31_12_13_15_15BM24_16R31_17R31_18R31_19_34R24_35R24_36R24_37R24_38R24_39R24_69R7_276R1_411_1029R1_1042R24	5	2	3	1R1-7-8|2R1-3R1-5-6-9-10R1-11-15-19|2R1BM24-6BM31-11BM31-15BM24-16R31-17R31-18R31-411-1042R24|4R1-12-13|34R24-35R24-36R24-37R24-38R24-39R24-69R7-276R1-1029R1	889001342	416500000	472501342	-56001342	12
619	619T1	'06/1949	'982009104253089	Matched	Clade_A2	Clade_A2-10	DFT1_0	DFT1_0	Novariants	West Pencil Pine	-41.717464999999997	145.85587000000001	2006	Unknown	DFT1	Cell-Line	No	Yes	Yes	Unknown				Singleton		0.98499999999999999	1.0329999999999999	Not Available	1.0089999999999999	Yes	Yes	M	3	Strain 1	M5 loss		35	16	19	1R1_2R1_2R1BM6_3R1_3R1BM6_4R1_5_6_6BM17_7_8_9_9BM6_10R1_10R1BM6_11_11BM17_12_13_15_15BM6_16R17_17R17_18R17_19_22_26_27R1_34R6_35R6_36R6_37R6_38R6_39R6_69R6	8	2	6	1R1-7-8|2R1-3R1-5-6-9-10R1-11-15-19|2R1BM6-3R1BM6-9BM6-10R1BM6-15BM6|4R1-12-13|6BM17-11BM17-16R17-17R17-18R17|22|26-27R1|34R6-35R6-36R6-37R6-38R6-39R6-69R6	495207000	252300000	242907000	9393000	18
620	620T1	'06/2336	'985120016113034	Unmatched	Clade_A2	Clade_A2-8	DFT1_1	DFT1_1	10133C>T	Narawntapu	-41.139961999999997	146.64416399999999	2006	Unknown	DFT1	Cell-Line	No	Yes	No (cell line mislabelling or contamination)	Unknown				Singleton		0.98399999999999999	0.99299999999999999	Not Available	0.98850000000000005	Yes	Yes	M	4	Strain 1 tetraploid	M5 loss	Tetraploid (5)	42	24	18	1R1_2R1_2R1BM13_3R1_4R1_5_6_6BM17_7_8_9_10R1_11_11BM17_12_13_15_16R17_17R17_18R17_19_22_26_27R1_37R13_78R4_80_120R13_193R3_253R2_254_257R1_259R1_261R1_263R1_379R2_833R1_889R2_910R1_984_1042R13_1853	9	2	7	1R1-7-8|2R1-3R1-5-6-9-10R1-11-15-19|2R1BM13-1042R13|4R1-12-13|6BM17-11BM17-16R17-17R17-18R17|22|26-27R1|37R13-78R4-120R13-193R3-253R2-254-257R1-259R1-261R1-263R1-379R2-833R1-889R2-910R1-1853|80-984	1095701342	535500000	560201342	-24701342
626	626T1	Unknown	'982000123208441	Matched	Clade_B	Clade_B-8	DFT1_2	DFT1_2	14114C>T	Bronte Park	-42.124875000000003	146.46679	2015	Unknown	DFT1	Tissue	No	Yes (italicised)	Yes	Facial/oral	Lower front right jaw			Singleton		0.23300000000000001	Not Available	0.496	0.23300000000000001	No	Yes	F	2	No data (confirmed)			18	9	9	1R1_2R1_3R1_4R1_5_6_7_8_9_10R1_11_12_13_15_19_20R1_21R1_25	6	1	5	1R1-7-8|2R1-3R1-5-6-9-10R1-11-15-19|4R1-12-13|20R1|21R1|25	225000000	159900000	65100000	94800000	18
627	627T1	Unknown	'982000356432649	Matched	Clade_B	Clade_B-8	DFT1_2	DFT1_2	14114C>T	Bronte Park	-42.124875000000003	146.46679	2015	Unknown	DFT1	Tissue	No	Yes	Yes	Facial/oral	Lower right lip			Singleton		0.54800000000000004	Not Available	0.67800000000000005	0.54800000000000004	No	Yes	M	2	No data			24	13	11	1R1_2R1_3R1_4R1_5_6_7_8_9_10R1_11_12_13_15_19_20R1_21R1_25_47R2_89_89G1CN4_96_111_111G1CN4	8	2	6	1R1-7-8|2R1-3R1-5-6-9-10R1-11-15-19|4R1-12-13|20R1|21R1|25|47R2-96|89-89G1CN4-111-111G1CN4	300500000	166700000	133800000	32900000	24
628	628T1	Unknown	'982000191009681	Unmatched	Clade_B	Clade_B-6	DFT1_0	DFT1_0	Novariants	Fentonbury	-42.653722000000002	146.76054099999999	2015	Unknown	DFT1	Tissue	No	Yes	Yes	Facial/oral	Right side lower jaw			Multiple		0.90200000000000002	Not Available	Not Available	0.90200000000000002	No	Yes	F	1	No data			19	9	10	1R1_2R1_3R1_4R1_5_6_7_8_9_10R1_11_12_13_15_19_20R1_21R1_25_50	7	1	6	1R1-7-8|2R1-3R1-5-6-9-10R1-11-15-19|4R1-12-13|20R1|21R1|25|50	236100000	159900000	76200000	83700000	19
628	628T2	Unknown	'982000191009681	Unmatched	Clade_B	Clade_B-6	DFT1_0	DFT1_0	Novariants	Fentonbury	-42.653722000000002	146.76054099999999	2015	Unknown	DFT1	Tissue	No	Yes	Yes	Facial/oral	Front right lower jaw			Multiple		0.85899999999999999	Not Available	Not Available	0.85899999999999999	No	Yes	F	1	No data			19	9	10	1R1_2R1_3R1_4R1_5_6_7_8_9_10R1_11_12_13_15_19_20R1_21R1_25_50	7	1	6	1R1-7-8|2R1-3R1-5-6-9-10R1-11-15-19|4R1-12-13|20R1|21R1|25|50	236100000	159900000	76200000	83700000	19
628	628T3	Unknown	'982000191009681	Unmatched	Clade_B	Clade_B-6	DFT1_0	DFT1_0	Novariants	Fentonbury	-42.653722000000002	146.76054099999999	2015	Unknown	DFT1	Tissue	No	Yes	Yes	Facial/oral	Left side lower jaw			Multiple		0.751	Not Available	Not Available	0.751	No	Yes	F	1	No data			19	9	10	1R1_2R1_3R1_4R1_5_6_7_8_9_10R1_11_12_13_15_19_20R1_21R1_25_50	7	1	6	1R1-7-8|2R1-3R1-5-6-9-10R1-11-15-19|4R1-12-13|20R1|21R1|25|50	236100000	159900000	76200000	83700000	19
629	629T1	Unknown	'982000191015685	Matched	Clade_B	Clade_B-6	DFT1_0	DFT1_0	Novariants	Fentonbury	-42.653722000000002	146.76054099999999	2015	14/05/2015	DFT1	Tissue	No	Yes	Yes	Facial/oral	Lower left lip			Singleton		0.42699999999999999	Not Available	0.77100000000000002	0.42699999999999999	No	Yes	F	2	No data			19	9	10	1R1_2R1_3R1_4R1_5_6_7_8_9_10R1_11_12_13_15_19_20R1_21R1_25_50	7	1	6	1R1-7-8|2R1-3R1-5-6-9-10R1-11-15-19|4R1-12-13|20R1|21R1|25|50	236100000	159900000	76200000	83700000	19
630	630T1	Unknown	'982000363454290	Matched	Clade_B	Clade_B-6	DFT1_0	DFT1_0	Novariants	Fentonbury	-42.653722000000002	146.76054099999999	2015	20/05/2015	DFT1	Tissue	No	Yes	Yes	Facial/oral	right side of face			Singleton		0.872	Not Available	Not Available	0.872	No	Yes	M	3	No data			19	9	10	1R1_2R1_3R1_4R1_5_6_7_8_9_10R1_11_12_13_15_19_20R1_21R1_25_50	7	1	6	1R1-7-8|2R1-3R1-5-6-9-10R1-11-15-19|4R1-12-13|20R1|21R1|25|50	236100000	159900000	76200000	83700000	19
631	631T1	Unknown	'982000363283082	Matched	Clade_C	Clade_C-3	DFT1_5	DFT1_5	2681C>T	Granville Harbour	-41.805917999999998	145.04102599999999	2015	30/06/2015	DFT1	Tissue	No	Yes	Yes	Facial/oral	left side of face			Singleton		0.75600000000000001	Not Available	0.79300000000000004	0.75600000000000001	No	Yes	M	5	No data		Tetraploid (9)	22	10	12	1R1_2R1_3R1_4R1_5_6_7_8_9_10R1_11_12_13_15_19_52R2_53R1_61R1_62_68_345R2_823	6	2	4	1R1-7-8|2R1-3R1-5-6-9-10R1-11-15-19|4R1-12-13|52R2-53R1-61R1-68-823|62|345R2	738100000	679000000	59100000	619900000
632	632T1	Unknown	'982000356526482	Matched	Clade_B	Clade_B-3	DFT1_7	DFT1_7A2	2707G>A;8529G>A;6308T>C	Kempton	-42.525894000000001	147.20354900000001	2015	15/05/2015	DFT1	Tissue	No	Yes	Yes	Neck	Left side of neck ventral to head			Singleton		0.46500000000000002	Not Available	0.80800000000000005	0.46500000000000002	No	Yes	F	2	No data			26	15	11	1R1_2R1_3R1_4R1_5_6_7_8_9_10R1_11_12_13_15_19_20R1_47R1_51R3_57_58_100_112_113_138_139G1CN4_1035	7	3	4	1R1-7-8|2R1-3R1-5-6-9-10R1-11-15-19|4R1-12-13|20R1|47R1-51R3-57-58|100-112-113-1035|138-139G1CN4	279191573	175591573	103600000	71991573	26
634	634T1	Unknown	'982000356574868	Unmatched	Clade_C	Clade_C-3	DFT1_5	DFT1_5A1	2681C>T;4266G>A;14953T>C	Takone	-41.162607999999999	145.63892799999999	2015	30/06/2015	DFT1	Tissue	No	Yes	Yes	Facial/oral	Front right lower lip			Multiple		0.83899999999999997	Not Available	0.80400000000000005	0.83899999999999997	No	Yes	F	2	No data			20	12	8	1R1_2R1_3R1_4R1_5_6_7_8_9_10R1_11_12_13_15_19_1002_1010_1011_1032R3_1854	6	2	4	1R1-7-8|2R1-3R1-5-6-9-10R1-11-15-19|4R1-12-13|1002-1011-1854|1010|1032R3	299400000	246000000	53400000	192600000	20
634	634T2	Unknown	'982000356574868	Unmatched	Clade_C	Clade_C-3	DFT1_5	DFT1_5A1	2681C>T;4266G>A;14953T>C	Takone	-41.162607999999999	145.63892799999999	2015	30/06/2015	DFT1	Tissue	No	Yes	Yes	Facial/oral	Left upper lip			Multiple		0.46500000000000002	Not Available	0.71299999999999997	0.46500000000000002	No	Yes	F	2	No data			20	12	8	1R1_2R1_3R1_4R1_5_6_7_8_9_10R1_11_12_13_15_19_1002_1010_1011_1032R3_1854	6	2	4	1R1-7-8|2R1-3R1-5-6-9-10R1-11-15-19|4R1-12-13|1002-1011-1854|1010|1032R3	299400000	246000000	53400000	192600000	20
635	635T1	Unknown	'982009106575584	Matched	Clade_C	Clade_C-3	DFT1_5	DFT1_5	2681C>T	Takone	-41.162607999999999	145.63892799999999	2015	25/06/2015	DFT1	Tissue	No	Yes	Yes	Facial/oral	Interior right lower lip			Multiple		0.23899999999999999	Not Available	0.53400000000000003	0.23899999999999999	No	Yes	M	2	No data			19	10	9	1R1_2R1_3R1_4R1_5_6_7_8_9_10R1_11_12_13_15_19_904_936_990R1_990R1L1CN0	6	2	4	1R1-7-8|2R1-3R1-5-6-9-10R1-11-15-19|4R1-12-13|904|936|990R1-990R1L1CN0	254600000	171700000	82900000	88800000	19
635	635T2	Unknown	'982009106575584	Matched	Clade_C	Clade_C-3	DFT1_5	DFT1_5A1	2681C>T;4266G>A;14953T>C	Takone	-41.162607999999999	145.63892799999999	2015	25/06/2015	DFT1	Tissue	No	Yes	Yes	Facial/oral	Interior front lower lip			Multiple		0.26400000000000001	Not Available	0.51600000000000001	0.26400000000000001	No	Yes	M	2	No data			22	12	10	1R1_2R1_3R1_4R1_5_6_7_8_9_10R1_11_12_13_15_19_990R2_990R2L1CN0_1002_1010_1011_1032R3_1854	7	2	5	1R1-7-8|2R1-3R1-5-6-9-10R1-11-15-19|4R1-12-13|990R2-990R2L1CN0|1002-1011-1854|1010|1032R3	304000000	246000000	58000000	188000000	22
636	636T1	Unknown	'982000363485080	Matched	Clade_B	Clade_B-5	DFT1_2	DFT1_2	14114C>T	Buckland	-42.613394	147.70647	2015	10/06/2015	DFT1	Tissue	No	Yes (italicised)	Yes	Facial/oral	left side of face			Singleton		0.84099999999999997	Not Available	0.88200000000000001	0.84099999999999997	No	Yes	F	3	No data (confirmed)			22	11	11	1R1_2R1_3R1_4R1_5_6_7_8_9_10R1_11_12_13_15_19_20R1_21R1_25_893_895_927_969	8	2	6	1R1-7-8|2R1-3R1-5-6-9-10R1-11-15-19|4R1-12-13|20R1|21R1|25|893-895|927-969	282100000	163000000	119100000	43900000	22
637	637T1	Unknown	'982000363393409	Matched	DFT2	DFT2	DFT2_0	DFT2_0	Novariants	Nicholls Rivulet	-43.077604000000001	147.15378999999999	2015	01/06/2015	DFT2	Tissue	No	No (not DFT1)	No (not DFT1)	Facial/oral				Multiple		0.68200000000000005	Not Available	Not Available	0.68200000000000005	No	Yes	F	3	No data (confirmed)			29	12	17	1R2_42R4_971_1635_1639_1645_1647_1753_1761_1761G1CN4_1775_1776R1_1780_1781_1782R2_1783_1784_1787_1788_1789_1790_1791_1792_1792L1CN0_1793_1794_1795_1797_1801R2	3	2	1	1R2-42R4-971-1775-1776R1-1781-1782R2-1783-1784-1787-1791-1792-1792L1CN0-1793-1794-1795-1797|1635-1639-1645-1647|1753-1761-1761G1CN4-1780-1788-1789-1790-1801R2	204600000	87200000	117400000	-30200000	29
637	637T2	Unknown	'982000363393409	Matched	DFT2	DFT2	DFT2_0	DFT2_0	Novariants	Nicholls Rivulet	-43.077604000000001	147.15378999999999	2015	01/06/2015	DFT2	Tissue	No	No (not DFT1)	No (not DFT1)	Facial/oral				Multiple		0.77200000000000002	Not Available	Not Available	0.77200000000000002	No	Yes	F	3	No data (confirmed)			29	12	17	1R2_42R4_971_1635_1639_1645_1647_1753_1761_1761G1CN4_1775_1776R1_1780_1781_1782R2_1783_1784_1787_1788_1789_1790_1791_1792_1792L1CN0_1793_1794_1795_1797_1801R2	3	2	1	1R2-42R4-971-1775-1776R1-1781-1782R2-1783-1784-1787-1791-1792-1792L1CN0-1793-1794-1795-1797|1635-1639-1645-1647|1753-1761-1761G1CN4-1780-1788-1789-1790-1801R2	204600000	87200000	117400000	-30200000	29
638	638T1	Unknown	'982000363452012	Matched	DFT2	DFT2	DFT2_0	DFT2_0	Novariants	Nicholls Rivulet	-43.077604000000001	147.15378999999999	2015	18/06/2015	DFT2	Tissue	No	No (not DFT1)	No (not DFT1)	Facial/oral	right side of face			Multiple		0.80600000000000005	Not Available	Not Available	0.80600000000000005	No	Yes	M	Unknown	No data			31	14	17	1R2_42R4_971_1635_1639_1645_1647_1753_1761_1761G1CN4_1761G1CN5_1761G1CN6_1775_1776R1_1780_1781_1782R2_1783_1784_1787_1788_1789_1790_1791_1792_1792L1CN0_1793_1794_1795_1797_1801R2	5	4	1	1R2-42R4-971-1775-1776R1-1781-1782R2-1783-1784-1787-1791-1792-1792L1CN0-1793-1794-1795-1797|1635-1639-1645-1647|1753-1761-1761G1CN4-1780-1788-1789-1790-1801R2|1761G1CN5|1761G1CN6	206400000	89000000	117400000	-28400000	31
638	638T2	Unknown	'982000363452012	Matched	DFT2	DFT2	DFT2_0	DFT2_0	Novariants	Nicholls Rivulet	-43.077604000000001	147.15378999999999	2015	18/06/2015	DFT2	Tissue	No	No (not DFT1)	No (not DFT1)	Facial/oral	right side of face			Multiple		0.84299999999999997	Not Available	Not Available	0.84299999999999997	No	Yes	M	Unknown	No data			30	12	18	1R2_42R4_971_1508_1635_1639_1645_1647_1753_1761_1761G1CN4_1775_1776R1_1780_1781_1782R2_1783_1784_1787_1788_1789_1790_1791_1792_1792L1CN0_1793_1794_1795_1797_1801R2	4	2	2	1R2-42R4-971-1775-1776R1-1781-1782R2-1783-1784-1787-1791-1792-1792L1CN0-1793-1794-1795-1797|1508|1635-1639-1645-1647|1753-1761-1761G1CN4-1780-1788-1789-1790-1801R2	209500000	87200000	122300000	-35100000	30
639	639T1	Unknown	'982000363452126	Matched	Clade_A2	Clade_A2-5	DFT1_0	DFT1_0	Novariants	Stony Head	-41.014394000000003	147.013229	2015	Unknown	DFT1	Tissue	No	Yes	Yes	Facial/oral	Lower right lip			Singleton		0.79200000000000004	Not Available	Not Available	0.79200000000000004	No	Yes	M	Unknown	Strain 1 tetraploid	M5 loss	Tetraploid (4)	33	15	18	1R1_2R1_3R1_4R1_5_6_6BM13_7_8_9_10R1_11_11BM13_12_13_15_16R13_17R13_18R13_19_19G1CN4_22_26_27R1_40R1_43R1_49R1_60_321R2_837R2_873_1801R1_1863	9	3	6	1R1-7-8|2R1-3R1-5-6-9-10R1-11-15-19|4R1-12-13|6BM13-11BM13-16R13-17R13-18R13-60|19G1CN4-873-1801R1|22|26-27R1|40R1-43R1-49R1|321R2-837R2-1863	364248000	255541000	108707000	146834000
643	643T1	Unknown	'982000123210419	Matched	Clade_B	Clade_B-8	DFT1_2	DFT1_2	14114C>T	Bronte Park	-42.124875000000003	146.46679	2015	18/05/2015	DFT1	Tissue	No	Yes	Yes	Skin	Left shoulder			Singleton		0.42099999999999999	Not Available	0.59299999999999997	0.42099999999999999	No	Yes	F	2	No data			19	9	10	1R1_2R1_3R1_4R1_5_6_7_8_9_10R1_11_12_13_15_19_20R1_21R1_25_1007	7	1	6	1R1-7-8|2R1-3R1-5-6-9-10R1-11-15-19|4R1-12-13|20R1|21R1|25|1007	225800000	159900000	65900000	94000000	19
669	669T1	'16/1931	'982000363454373	Matched	Clade_B	Clade_B-6	DFT1_0	DFT1_0	Novariants	Fentonbury	-42.653722000000002	146.76054099999999	2016	23/05/2016	DFT1	Tissue	No	Yes	Yes	Facial/oral	Left side lower jaw			Multiple		0.502	0.46100000000000002	0.53700000000000003	0.48149999999999998	Yes	Yes	F	2	No data	M5 gain		25	14	11	1R1_2R1_3R1_4R1_5_6_6G1CN4_7_8_9_10R1_11_11G1CN4_12_13_15_284R1_1803R1_285R1_19_20R1_21R1_25_50_511	9	2	7	1R1-7-8|2R1-3R1-5-6-9-10R1-11-15-19|4R1-12-13|6G1CN4-11G1CN4-284R1-285R1-1803R1|20R1|21R1|25|50|511	245407000	168107000	77300000	90807000	25
669	669T2	'16/1931	'982000363454373	Matched	Clade_B	Clade_B-6	DFT1_0	DFT1_0	Novariants	Fentonbury	-42.653722000000002	146.76054099999999	2016	23/05/2016	DFT1	Tissue	No	Yes	Yes	Facial/oral	Right side lower jaw			Multiple		0.77500000000000002	Not Available	Not Available	0.77500000000000002	No	Yes	F	2	No data			19	9	10	1R1_2R1_3R1_4R1_5_6_7_8_9_10R1_11_12_13_15_19_20R1_21R1_25_50	7	1	6	1R1-7-8|2R1-3R1-5-6-9-10R1-11-15-19|4R1-12-13|20R1|21R1|25|50	236100000	159900000	76200000	83700000	19
669	669T3	'16/1931	'982000363454373	Matched	Clade_B	Clade_B-6	DFT1_0	DFT1_0	Novariants	Fentonbury	-42.653722000000002	146.76054099999999	2016	23/05/2016	DFT1	Tissue	No	Yes	Yes	Facial/oral	Right side of face near nose			Multiple		0.34399999999999997	0.35	0.48899999999999999	0.34699999999999998	Yes	Yes	F	2	No data			19	9	10	1R1_2R1_3R1_4R1_5_6_7_8_9_10R1_11_12_13_15_19_20R1_21R1_25_50	7	1	6	1R1-7-8|2R1-3R1-5-6-9-10R1-11-15-19|4R1-12-13|20R1|21R1|25|50	236100000	159900000	76200000	83700000	19
669	669T4	'16/1931	'982000363454373	Matched	Clade_B	Clade_B-6	DFT1_0	DFT1_0	Novariants	Fentonbury	-42.653722000000002	146.76054099999999	2016	23/05/2016	DFT1	Tissue	No	Yes	Yes	Facial/oral	Left upper lip			Multiple		0.93400000000000005	0.93300000000000005	Not Available	0.9335	Yes	Yes	F	2	No data			27	15	12	1R1_2R1_3R1_4R1_5_6_7_8_9_10R1_11_12_13_15_17R41_18R41_19_20R1_21R1_25_34R34_35R34_36R34_37R34_38R34_39R34_50	9	2	7	1R1-7-8|2R1-3R1-5-6-9-10R1-11-15-19|4R1-12-13|17R41-18R41|20R1|21R1|25|34R34-35R34-36R34-37R34-38R34-39R34|50	317407000	239800000	77607000	162193000	27
669	669T5	'16/1931	'982000363454373	Matched	Clade_B	Clade_B-6	DFT1_21	DFT1_21	2185A>G	Fentonbury	-42.653722000000002	146.76054099999999	2016	23/05/2016	DFT1	Tissue	No	Yes	Yes	Neck	Right side ventral to neck			Multiple		0.752	0.746	0.86499999999999999	0.749	Yes	Yes	F	2	No data			19	9	10	1R1_2R1_3R1_4R1_5_6_7_8_9_10R1_11_12_13_15_19_20R1_21R1_25_50	7	1	6	1R1-7-8|2R1-3R1-5-6-9-10R1-11-15-19|4R1-12-13|20R1|21R1|25|50	236100000	159900000	76200000	83700000	19
669	669T6	'16/1931	'982000363454373	Matched	Clade_B	Clade_B-6	DFT1_21	DFT1_21	2185A>G	Fentonbury	-42.653722000000002	146.76054099999999	2016	23/05/2016	DFT1	Tissue	No	Yes	Yes	Skin	Right hand side dorsal near rib			Multiple		0.75900000000000001	0.72799999999999998	0.90300000000000002	0.74350000000000005	Yes	Yes	F	2	No data			19	9	10	1R1_2R1_3R1_4R1_5_6_7_8_9_10R1_11_12_13_15_19_20R1_21R1_25_50	7	1	6	1R1-7-8|2R1-3R1-5-6-9-10R1-11-15-19|4R1-12-13|20R1|21R1|25|50	236100000	159900000	76200000	83700000	19
678	678T1	'16/2160	'982000363458490	Matched	Clade_C	Clade_C-3	DFT1_5	DFT1_5	2681C>T	Granville Harbour	-41.805917999999998	145.04102599999999	2016	19/05/2016	DFT1	Tissue	No	Yes	Yes	Facial/oral	Left upper jaw near snout			Multiple		0.59	0.56999999999999995	0.70599999999999996	0.57999999999999996	Yes	Yes	F	2	No data	M5 loss	Tetraploid (9)	28	11	17	1R1_2R1_3R1_4R1_5_6_6BM34_7_8_9_10R1_11_11BM34_12_13_15_16R34_17R34_18R34_19_52R2_53R1_61R1_62_68_97_104_823	7	2	5	1R1-7-8|2R1-3R1-5-6-9-10R1-11-15-19|4R1-12-13|6BM34-11BM34-16R34-17R34-18R34|52R2-53R1-61R1-68-823|62|97-104	333007000	265700000	67307000	198393000
678	678T2	'16/2160	'982000363458490	Matched	Clade_C	Clade_C-3	Unknown	Unknown	Unknown	Granville Harbour	-41.805917999999998	145.04102599999999	2016	19/05/2016	DFT1	Tissue	No	Yes	Yes	Facial/oral	Right upper lip			Multiple		Not Available	0.92100000000000004	Not Available	0.92100000000000004	Yes	No	F	2	No data	No data	Tetraploid (9)
684	684T1	Unknown	'982000363282815	Matched	Clade_C	Clade_C-3	DFT1_5	DFT1_5	2681C>T	Granville Harbour	-41.805917999999998	145.04102599999999	2017	18/05/2017	DFT1	Tissue	No	Yes	Yes	Facial/oral	right side of face			Singleton		0.56100000000000005	Not Available	0.71399999999999997	0.56100000000000005	No	Yes	F	1	No data	M5 loss	Tetraploid (9)	29	12	17	1R1_2R1_3R1_4R1_5_6_6BM35_7_8_9_10R1_11_11BM35_12_13_15_16R35_17R35_18R35_19_52R2_53R1_61R1_62_68_97_104_345R1_823	8	3	5	1R1-7-8|2R1-3R1-5-6-9-10R1-11-15-19|4R1-12-13|6BM35-11BM35-16R35-17R35-18R35|52R2-53R1-61R1-68-823|62|97-104|345R1	852107000	784800000	67307000	717493000
697	697T1	'16/1770	'982000356533926	Matched	Clade_B	Clade_B-3	DFT1_7	DFT1_7A2	2707G>A;6308T>C;8529G>A	Kempton	-42.525894000000001	147.20354900000001	2016	10/05/2016	DFT1	Tissue	No	Yes	Yes	Facial/oral	Lower right jaw			Singleton		0.9	0.92100000000000004	0.89200000000000002	0.91049999999999998	Yes	Yes	M	2	Strain 2 evolved			26	15	11	1R1_2R1_3R1_4R1_5_6_7_8_9_10R1_11_12_13_15_19_20R1_47R1_51R3_57_58_100_112_113_138_139G1CN4_1035	7	3	4	1R1-7-8|2R1-3R1-5-6-9-10R1-11-15-19|4R1-12-13|20R1|47R1-51R3-57-58|100-112-113-1035|138-139G1CN4	279191573	175591573	103600000	71991573	26
700	700T1	'16/1769	'982000356643710	Matched	Clade_B	Clade_B-3	DFT1_7	DFT1_7A2	2707G>A;6308T>C;8529G>A	Kempton	-42.525894000000001	147.20354900000001	2016	17/05/2016	DFT1	Tissue	No	Yes	Yes	Facial/oral	Right upper lip			Multiple		0.58299999999999996	0.63100000000000001	0.77500000000000002	0.60699999999999998	Yes	Yes	F	2	No data			26	15	11	1R1_2R1_3R1_4R1_5_6_7_8_9_10R1_11_12_13_15_19_20R1_47R1_51R3_57_58_100_112_113_138_139G1CN4_1035	7	3	4	1R1-7-8|2R1-3R1-5-6-9-10R1-11-15-19|4R1-12-13|20R1|47R1-51R3-57-58|100-112-113-1035|138-139G1CN4	279191573	175591573	103600000	71991573	26
700	700T2	'16/1769	'982000356643710	Matched	Clade_B	Clade_B-3	DFT1_7	DFT1_7A2	2707G>A;6308T>C;8529G>A	Kempton	-42.525894000000001	147.20354900000001	2016	17/05/2016	DFT1	Tissue	No	Yes	Yes	Facial/oral	Right lower lip			Multiple		0.84599999999999997	0.85199999999999998	0.91600000000000004	0.84899999999999998	Yes	Yes	F	2	No data			30	16	14	1R1_2R1_2R1BM32_3R1_3R1BM32_4R1_5_6_7_8_9_9BM32_10R1_11_12_13_15_19_20R1_47R1_51R3_57_58_100_112_113_138_139G1CN4_567_1035	9	4	5	1R1-7-8|2R1-3R1-5-6-9-10R1-11-15-19|2R1BM32-3R1BM32-9BM32|4R1-12-13|20R1|47R1-51R3-57-58|100-112-113-1035|138-139G1CN4|567	337691573	176691573	161000000	15691573	30
700	700T3	'16/1769	'982000356643710	Matched	Clade_B	Clade_B-3	DFT1_7	DFT1_7A2	2707G>A;6308T>C;8529G>A	Kempton	-42.525894000000001	147.20354900000001	2016	17/05/2016	DFT1	Tissue	No	Yes	Yes	Facial/oral	Right side near lip			Multiple		0.58399999999999996	0.61399999999999999	0.78900000000000003	0.59899999999999998	Yes	Yes	F	2	No data			26	15	11	1R1_2R1_3R1_4R1_5_6_7_8_9_10R1_11_12_13_15_19_20R1_47R1_51R3_57_58_100_112_113_138_139G1CN4_1035	7	3	4	1R1-7-8|2R1-3R1-5-6-9-10R1-11-15-19|4R1-12-13|20R1|47R1-51R3-57-58|100-112-113-1035|138-139G1CN4	279191573	175591573	103600000	71991573	26
805	805T1	Unknown	Unknown	Matched	Clade_A2	Clade_A2-2	DFT1_12	DFT1_12	8374G>A	Campania	-42.664427000000003	147.42019500000001	2015	04/08/2015	DFT1	Tissue	No	Yes	Yes	Facial/oral	left side of face			Multiple		0.76700000000000002	Not Available	0.82299999999999995	0.76700000000000002	No	Yes	M	2	No data	M5 loss		29	12	17	1R1_2R1_3R1_4R1_5_6_6BM8_7_8_9_10R1_11_11BM8_12_13_15_16R8_17R8_18R8_19_22_22BM1_117_164R1_165R1_856_906_934_965	9	3	6	1R1-7-8|2R1-3R1-5-6-9-10R1-11-15-19|4R1-12-13|6BM8-11BM8-16R8-17R8-18R8-117|22|22BM1-856|164R1-165R1-906|934|965	303707000	163500000	140207000	23293000	29
805	805T2	Unknown	Unknown	Matched	Clade_A2	Clade_A2-2	DFT1_12	DFT1_12	8374G>A	Campania	-42.664427000000003	147.42019500000001	2015	04/08/2015	DFT1	Tissue	No	Yes	Yes	Facial/oral	right side of face			Multiple		0.60499999999999998	Not Available	0.85	0.60499999999999998	No	Yes	M	2	No data	M5 loss		29	12	17	1R1_2R1_3R1_4R1_5_6_6BM8_7_8_9_10R1_11_11BM8_12_13_15_16R8_17R8_18R8_19_22_22BM1_117_164R1_165R1_856_906_934_965	9	3	6	1R1-7-8|2R1-3R1-5-6-9-10R1-11-15-19|4R1-12-13|6BM8-11BM8-16R8-17R8-18R8-117|22|22BM1-856|164R1-165R1-906|934|965	303707000	163500000	140207000	23293000	29
805	805T3	Unknown	Unknown	Matched	Clade_A2	Clade_A2-2	DFT1_12	DFT1_12	8374G>A	Campania	-42.664427000000003	147.42019500000001	2015	04/08/2015	DFT1	Tissue	No	Yes	No (metastasis with matched primary)	Lymph node	Submandibular lymph node	Metastasis		Multiple		0.36699999999999999	Not Available	0.65300000000000002	0.36699999999999999	No	Yes	M	2	No data	M5 loss		29	12	17	1R1_2R1_3R1_4R1_5_6_6BM8_7_8_9_10R1_11_11BM8_12_13_15_16R8_17R8_18R8_19_22_22BM1_117_164R1_165R1_856_906_934_965	9	3	6	1R1-7-8|2R1-3R1-5-6-9-10R1-11-15-19|4R1-12-13|6BM8-11BM8-16R8-17R8-18R8-117|22|22BM1-856|164R1-165R1-906|934|965	303707000	163500000	140207000	23293000	29
807	807T1a	Unknown	'R00000020151130	Matched	DFT2	DFT2	DFT2_0	DFT2_0	Novariants	Cygnet	-43.144903999999997	147.06788499999999	2015	30/10/2015	DFT2	Tissue	No	No (not DFT1)	No (not DFT1)	Unknown				Singleton		Not Available	Not Available	Not Available	N/A	No	Yes	M	5	No data			28	10	18	1R2_42R4_971_1753_1754_1755_1761_1761G1CN4_1773_1775_1776R1_1780_1781_1782R2_1783_1784_1787_1788_1789_1790_1791_1792_1792L1CN0_1793_1794_1795_1797_1801R2	4	2	2	1R2-42R4-971-1775-1776R1-1781-1782R2-1783-1784-1787-1791-1792-1792L1CN0-1793-1794-1795-1797|1753-1761-1761G1CN4-1780-1788-1789-1790-1801R2|1754-1755|1773	223500000	105300000	118200000	-12900000	28
808	808T1	Unknown	'982009106536238	Matched	Clade_B	Clade_B-9	DFT1_2	DFT1_2	14114C>T	Narawntapu	-41.139961999999997	146.64416399999999	2015	02/11/2015	DFT1	Tissue	No	Yes	Yes	Facial/oral	Interior lower left lip			Singleton		0.59499999999999997	0.57499999999999996	0.71	0.58499999999999996	Yes	Yes	F	Unknown	Strain 2			18	9	9	1R1_2R1_3R1_4R1_5_6_7_8_9_10R1_11_12_13_15_19_20R1_21R1_25	6	1	5	1R1-7-8|2R1-3R1-5-6-9-10R1-11-15-19|4R1-12-13|20R1|21R1|25	225000000	159900000	65100000	94800000	18
809	809T1	Unknown	Unknown	Matched	DFT2	DFT2	DFT2_0	DFT2_0	Novariants	Woodbridge	-43.165942999999999	147.23095900000001	2015	16/12/2015	DFT2	Tissue	No	No (not DFT1)	No (not DFT1)	Facial/oral	left side of face			Multiple		0.77400000000000002	Not Available	Not Available	0.77400000000000002	No	Yes	M	3	No data			26	9	17	1R2_42R4_971_1664_1753_1761_1761G1CN4_1775_1776R1_1780_1781_1782R2_1783_1784_1787_1788_1789_1790_1791_1792_1792L1CN0_1793_1794_1795_1797_1801R2	3	2	1	1R2-42R4-971-1775-1776R1-1781-1782R2-1783-1784-1787-1791-1792-1792L1CN0-1793-1794-1795-1797|1664|1753-1761-1761G1CN4-1780-1788-1789-1790-1801R2	196600000	79200000	117400000	-38200000	26
809	809T1a	Unknown	Unknown	Matched	DFT2	DFT2	DFT2_0	DFT2_0	Novariants	Woodbridge	-43.165942999999999	147.23095900000001	2015	16/12/2015	DFT2	Tissue	No	No (not DFT1)	No (not DFT1)	Unknown				Multiple	Duplicate DNA extraction from same tumour	Not Available	Not Available	Not Available	N/A	No	Yes	M	3	No data			26	9	17	1R2_42R4_971_1664_1753_1761_1761G1CN4_1775_1776R1_1780_1781_1782R2_1783_1784_1787_1788_1789_1790_1791_1792_1792L1CN0_1793_1794_1795_1797_1801R2	3	2	1	1R2-42R4-971-1775-1776R1-1781-1782R2-1783-1784-1787-1791-1792-1792L1CN0-1793-1794-1795-1797|1664|1753-1761-1761G1CN4-1780-1788-1789-1790-1801R2	196600000	79200000	117400000	-38200000	26
811	811T1	Unknown	'S000000120116	Matched	Clade_A1	Clade_A1-3A1	DFT1_3	DFT1_3A1	1828A>G;3255G>A;14130G>A	Margate	-43.034731999999998	147.272053	2016	12/01/2016	DFT1	Tissue	No	Yes	Yes	Facial/oral	Left lower jaw			Multiple		0.91	Not Available	0.96299999999999997	0.91	No	Yes	M	3	No data	M5 loss		22	9	13	1R1_2R1_3R1_4R1_5_6_6BM4_7_8_9_10R1_11_11BM4_12_13_15_16R4_17R4_18R4_19_23_24	5	1	4	1R1-7-8|2R1-3R1-5-6-9-10R1-11-15-19|4R1-12-13|6BM4-11BM4-16R4-17R4-18R4|23-24	284407000	159900000	124507000	35393000	22
811	811T2	Unknown	'S000000120116	Matched	Clade_A1	Clade_A1-3A1	DFT1_3	DFT1_3A1b	1828A>G;3255G>A;14130G>A;14633A>G	Margate	-43.034731999999998	147.272053	2016	12/01/2016	DFT1	Tissue	No	Yes	Yes	Facial/oral	Right side where mouth ends			Multiple		0.85899999999999999	Not Available	0.77200000000000002	0.85899999999999999	No	Yes	M	3	No data	M5 loss		24	11	13	1R1_2R1_3R1_4R1_5_6_6BM4_7_8_9_10R1_11_11BM4_12_13_15_16R4_17R4_18R4_19_23_24_938_999	6	2	4	1R1-7-8|2R1-3R1-5-6-9-10R1-11-15-19|4R1-12-13|6BM4-11BM4-16R4-17R4-18R4|23-24|938-999	286407000	161900000	124507000	37393000	24
811	811T4	Unknown	'S000000120116	Matched	Clade_A1	Clade_A1-3A1	DFT1_3	DFT1_3A1	1828A>G;3255G>A;14130G>A	Margate	-43.034731999999998	147.272053	2016	12/01/2016	DFT1	Tissue	No	Yes	No (metastasis with matched primary)	Lymph node	Submandibular lymph node	Metastasis		Multiple		0.48899999999999999	Not Available	0.78300000000000003	0.48899999999999999	No	Yes	M	3	No data	M5 loss		22	9	13	1R1_2R1_3R1_4R1_5_6_6BM4_7_8_9_10R1_11_11BM4_12_13_15_16R4_17R4_18R4_19_23_24	5	1	4	1R1-7-8|2R1-3R1-5-6-9-10R1-11-15-19|4R1-12-13|6BM4-11BM4-16R4-17R4-18R4|23-24	284407000	159900000	124507000	35393000	22
812	812T1	Unknown	'982000356483454	Matched	DFT2	DFT2	DFT2_0	DFT2_0	Novariants	Snug	-43.077604000000001	147.15378999999999	2016	12/01/2016	DFT2	Tissue	No	No (not DFT1)	No (not DFT1)	Facial/oral	Left side ventral to ear			Multiple		0.72599999999999998	Not Available	Not Available	0.72599999999999998	No	Yes	F	4	No data			27	9	18	1R2_42R4_971_1540_1611_1753_1761_1761G1CN4_1775_1776R1_1780_1781_1782R2_1783_1784_1787_1788_1789_1790_1791_1792_1792L1CN0_1793_1794_1795_1797_1801R2	4	2	2	1R2-42R4-971-1775-1776R1-1781-1782R2-1783-1784-1787-1791-1792-1792L1CN0-1793-1794-1795-1797|1540|1611|1753-1761-1761G1CN4-1780-1788-1789-1790-1801R2	221800000	103300000	118500000	-15200000	27
812	812T2	Unknown	'982000356483454	Matched	Clade_A1	Clade_A1-3A1	DFT1_3	DFT1_3A1	1828A>G;3255G>A;14130G>A	Snug	-43.077604000000001	147.15378999999999	2016	12/01/2016	DFT1	Tissue	No	Yes	Yes	Facial/oral	left side of face			Multiple		0.497	Not Available	0.71399999999999997	0.497	No	Yes	F	4	DFT2	M5 loss		25	12	13	1R1_2R1_3R1_4R1_5_6_6BM4_7_8_9_10R1_11_11BM4_12_13_15_16R4_17R4_18R4_19_23_24_54R3_101R3_156	6	2	4	1R1-7-8|2R1-3R1-5-6-9-10R1-11-15-19|4R1-12-13|6BM4-11BM4-16R4-17R4-18R4|23-24|54R3-101R3-156	292024950	167517950	124507000	43010950	25
812	812T3	Unknown	'982000356483454	Matched	Clade_A1	Clade_A1-3A1	DFT1_3	DFT1_3A1	1828A>G;3255G>A;14130G>A	Snug	-43.077604000000001	147.15378999999999	2016	12/01/2016	DFT1	Tissue	No	Yes	Yes	Facial/oral	Left upper lip			Multiple		0.89200000000000002	0.91900000000000004	0.90200000000000002	0.90549999999999997	Yes	Yes	F	4	DFT2	M5 loss		22	9	13	1R1_2R1_3R1_4R1_5_6_6BM4_7_8_9_10R1_11_11BM4_12_13_15_16R4_17R4_18R4_19_23_24	5	1	4	1R1-7-8|2R1-3R1-5-6-9-10R1-11-15-19|4R1-12-13|6BM4-11BM4-16R4-17R4-18R4|23-24	284407000	159900000	124507000	35393000	22
813	813T1	Unknown	'982000361951310	Matched	Clade_A1	Clade_A1-3A1	DFT1_3	DFT1_3A1	1828A>G;3255G>A;14130G>A	Margate	-43.034731999999998	147.272053	2016	13/01/2016	DFT1	Tissue	No	Yes	Yes	Facial/oral	Left lower lip extending down toward chin			Singleton		0.85099999999999998	Not Available	0.91600000000000004	0.85099999999999998	No	Yes	F	4	No data (confirmed)			21	12	9	1R1_2R1_3R1_4R1_5_6_7_8_9_10R1_11_12_13_15_19_23_24_40R5_49R6_72_77	7	3	4	1R1-7-8|2R1-3R1-5-6-9-10R1-11-15-19|4R1-12-13|23-24|40R5-49R6|72|77	296500000	162300000	134200000	28100000	21
814	814T1	Unknown	'982000167806989	Matched	Clade_A1	Clade_A1-3A1	DFT1_3	DFT1_3A1a	1828A>G;3255G>A;7033G>A;14130G>A	Margate	-43.034731999999998	147.272053	2016	14/01/2016	DFT1	Tissue	No	Yes	Yes	Facial/oral	Left side of hard palate			Singleton		0.56899999999999995	Not Available	0.72899999999999998	0.56899999999999995	No	Yes	M	2	No data (confirmed)			17	9	8	1R1_2R1_3R1_4R1_5_6_7_8_9_10R1_11_12_13_15_19_23_24	4	1	3	1R1-7-8|2R1-3R1-5-6-9-10R1-11-15-19|4R1-12-13|23-24	276200000	159900000	116300000	43600000	17
816	816T1	Unknown	'982000363454219	Matched	Clade_A1	Clade_A1-3A1	DFT1_3	DFT1_3A1	1828A>G;3255G>A;14130G>A	Pelverata	-43.077604000000001	147.15378999999999	2016	16/01/2016	DFT1	Tissue	No	Yes	Yes	Facial/oral	Upper left hard palate			Multiple		0.80600000000000005	Not Available	0.89400000000000002	0.80600000000000005	No	Yes	F	3	No data (confirmed)	M5 loss		22	9	13	1R1_2R1_3R1_4R1_5_6_6BM4_7_8_9_10R1_11_11BM4_12_13_15_16R4_17R4_18R4_19_23_24	5	1	4	1R1-7-8|2R1-3R1-5-6-9-10R1-11-15-19|4R1-12-13|6BM4-11BM4-16R4-17R4-18R4|23-24	284407000	159900000	124507000	35393000	22
816	816T2	Unknown	'982000363454219	Matched	Clade_A1	Clade_A1-3A1	DFT1_3	DFT1_3A1	1828A>G;3255G>A;14130G>A	Pelverata	-43.077604000000001	147.15378999999999	2016	16/01/2016	DFT1	Tissue	No	Yes	Yes	Facial/oral	Upper left hard palate (in front of T1)			Multiple		0.73799999999999999	Not Available	0.83	0.73799999999999999	No	Yes	F	3	No data (confirmed)	M5 loss		22	9	13	1R1_2R1_3R1_4R1_5_6_6BM4_7_8_9_10R1_11_11BM4_12_13_15_16R4_17R4_18R4_19_23_24	5	1	4	1R1-7-8|2R1-3R1-5-6-9-10R1-11-15-19|4R1-12-13|6BM4-11BM4-16R4-17R4-18R4|23-24	284407000	159900000	124507000	35393000	22
818	818T2	Unknown	'982000167740522	Matched	Clade_A1	Clade_A1-3A1	DFT1_3	DFT1_3A1	1828A>G;3255G>A;14130G>A	Snug	-43.077604000000001	147.15378999999999	2016	14/01/2016	DFT1	Tissue	No	Yes	Yes	Facial/oral	Hard palate near left hand side			Multiple		0.64800000000000002	Not Available	0.88900000000000001	0.64800000000000002	No	Yes	M	2	No data (confirmed)	M5 loss		22	9	13	1R1_2R1_3R1_4R1_5_6_6BM4_7_8_9_10R1_11_11BM4_12_13_15_16R4_17R4_18R4_19_23_24	5	1	4	1R1-7-8|2R1-3R1-5-6-9-10R1-11-15-19|4R1-12-13|6BM4-11BM4-16R4-17R4-18R4|23-24	284407000	159900000	124507000	35393000	22
818	818T3	Unknown	'982000167740522	Matched	DFT2	DFT2	DFT2_0	DFT2_0	Novariants	Snug	-43.077604000000001	147.15378999999999	2016	14/01/2016	DFT2	Tissue	No	No (not DFT1)	No (not DFT1)	Lymph node	Pre-auricular lymph node (left hand side)	Metastasis		Multiple		0.88400000000000001	Not Available	Not Available	0.88400000000000001	No	Yes	M	2	No data (confirmed)			27	9	18	1R2_42R4_971_1611_1753_1761_1761G1CN4_1761G1CN5_1775_1776R1_1780_1781_1782R2_1783_1784_1787_1788_1789_1790_1791_1792_1792L1CN0_1793_1794_1795_1797_1801R2	4	2	2	1R2-42R4-971-1775-1776R1-1781-1782R2-1783-1784-1787-1791-1792-1792L1CN0-1793-1794-1795-1797|1611|1753-1761-1761G1CN4-1780-1788-1789-1790-1801R2|1761G1CN5	196600000	78100000	118500000	-40400000	27
819	819T1	Unknown	'982000167812844	Matched	Clade_B	Clade_B-10	DFT1_2	DFT1_2A	4329G>A;14114C>T	West Pencil Pine	-41.717464999999997	145.85587000000001	2014	01/08/2014	DFT1	Tissue	No	Yes	Yes	Unknown				Singleton		0.45700000000000002	Not Available	0.79100000000000004	0.45700000000000002	No	Yes	F	Unknown	No data (confirmed)			24	10	14	1R1_2R1_3R1_4R1_5_6_7_8_9_10R1_11_12_13_15_19_20R1_21R1_25_128_838_843_974_986R1_998	8	2	6	1R1-7-8|2R1-3R1-5-6-9-10R1-11-15-19|4R1-12-13|20R1|21R1|25|128|838-843-974-986R1-998	252200000	160900000	91300000	69600000	23
820	820T1	'12/0345	'982009106207596	Matched	Clade_A2	Clade_A2-6	DFT1_6	DFT1_6	3161G>A	Judbury	-42.987875000000003	146.927492	2012	30/01/2012	DFT1	Tissue	No	Yes	Yes	Unknown				Singleton		0.85199999999999998	0.91800000000000004	0.91600000000000004	0.88500000000000001	Yes	Yes	F	Unknown	No data (confirmed)			18	9	9	1R1_2R1_3R1_4R1_5_6_7_8_9_10R1_11_12_13_15_19_22_26_27R1	5	1	4	1R1-7-8|2R1-3R1-5-6-9-10R1-11-15-19|4R1-12-13|22|26-27R1	242100000	159900000	82200000	77700000	18
821	821T2	'10/3634	Unknown	Matched	Clade_A1	Clade_A1-3A	DFT1_3	DFT1_3A	1828A>G;3255G>A	Forestier	-42.902220999999997	147.83382900000001	2010	07/11/2010	DFT1	Tissue	No	Yes	Yes	Unknown				Singleton		0.79400000000000004	0.81100000000000005	0.93100000000000005	0.80249999999999999	Yes	Yes	M	Unknown	No data (confirmed)	M5 loss		25	9	16	1R1_2R1_3R1_4R1_5_6_6BM38_7_8_9_10R1_11_11BM38_12_13_15_16R38_17R38_18R38_19_23_24_33_209_210	7	1	6	1R1-7-8|2R1-3R1-5-6-9-10R1-11-15-19|4R1-12-13|6BM38-11BM38-16R38-17R38-18R38|23-24|33|209-210	288807000	159900000	128907000	30993000	25
822	822T1	'09/2804	Unknown	Unmatched	Clade_A2	Clade_A2-11	DFT1_0	DFT1_0	Novariants	West Pencil Pine	-41.717464999999997	145.85587000000001	2009	Unknown	DFT1	Cell-Line	No	Yes	Yes	Unknown				Singleton		1	0.997	Not Available	0.99850000000000005	Yes	Yes	Unknown	Unknown	Strain 1	M5 loss		32	15	17	1R1_2R1_2R1BM7_3R1_3R1BM7_4R1_5_6_6BM17_7_8_9_9BM7_10R1_11_11BM17_12_13_15_16R17_17R17_18R17_19_22_26_27R1_34R7_35R7_36R7_37R7_38R7_39R7	8	2	6	1R1-7-8|2R1-3R1-5-6-9-10R1-11-15-19|2R1BM7-3R1BM7-9BM7|4R1-12-13|6BM17-11BM17-16R17-17R17-18R17|22|26-27R1|34R7-35R7-36R7-37R7-38R7-39R7	448407000	239800000	208607000	31193000	26
824	824T1	'14/2737	'982000191017308	Matched	Clade_A2	Clade_A2-6	DFT1_6	DFT1_6	3161G>A	Lonnavale	-42.921222	146.74811399999999	2014	26/07/2014	DFT1	Tissue	No	Yes	Yes	Facial/oral	Interior lower right lip			Singleton		0.52900000000000003	Not Available	0.60699999999999998	0.52900000000000003	No	Yes	M	2	No data			20	10	10	1R1_2R1_3R1_4R1_5_6_7_8_9_10R1_11_12_13_15_19_22_26_27R1_312R2_1023	7	2	5	1R1-7-8|2R1-3R1-5-6-9-10R1-11-15-19|4R1-12-13|22|26-27R1|312R2|1023	246100000	161000000	85100000	75900000	19
825	825T1	Unknown	'982000167814762	Matched	Clade_B	Clade_B-10	DFT1_2	DFT1_2B1	14114C>T;12362G>A;14412G>A	West Pencil Pine	-41.717464999999997	145.85587000000001	2014	01/08/2014	DFT1	Tissue	No	Yes	Yes	Unknown				Multiple		0.129	0.13800000000000001	0.50800000000000001	0.13350000000000001	No	No	F	Unknown	No data (confirmed)	No data
825	825T2	Unknown	'982000167814762	Matched	Clade_B	Clade_B-10	DFT1_2	DFT1_2B1	14114C>T;12362G>A;14412G>A	West Pencil Pine	-41.717464999999997	145.85587000000001	2014	01/08/2014	DFT1	Tissue	No	Yes	Yes	Unknown				Multiple		0.749	0.73199999999999998	0.76900000000000002	0.74050000000000005	Yes	Yes	F	Unknown	No data (confirmed)			18	9	9	1R1_2R1_3R1_4R1_5_6_7_8_9_10R1_11_12_13_15_19_20R1_21R1_25	6	1	5	1R1-7-8|2R1-3R1-5-6-9-10R1-11-15-19|4R1-12-13|20R1|21R1|25	225000000	159900000	65100000	94800000	18
826	826T1	Unknown	'900006000169079	Matched	Clade_B	Clade_B-10	DFT1_2	DFT1_2	14114C>T	West Pencil Pine	-41.717464999999997	145.85587000000001	2014	01/08/2014	DFT1	Tissue	No	Yes	Yes	Unknown				Multiple		0.84099999999999997	Not Available	0.89100000000000001	0.84099999999999997	No	Yes	F	Unknown	No data (confirmed)			25	14	11	1R1_2R1_3R1_4R1_5_6_7_8_9_10R1_11_12_13_15_19_20R1_21R1_25_180_180G1CN4_181_181G1CN4_182_876_955	8	2	6	1R1-7-8|2R1-3R1-5-6-9-10R1-11-15-19|4R1-12-13|20R1|21R1|25|180-180G1CN4-181-181G1CN4-182|876-955	238900000	164900000	74000000	90900000	23
826	826T2	Unknown	'900006000169079	Matched	Clade_B	Clade_B-10	DFT1_2	DFT1_2	14114C>T	West Pencil Pine	-41.717464999999997	145.85587000000001	2014	01/08/2014	DFT1	Tissue	No	Yes (italicised)	Yes	Unknown				Multiple		0.92400000000000004	Not Available	0.94499999999999995	0.92400000000000004	No	Yes	F	Unknown	No data (confirmed)			18	9	9	1R1_2R1_3R1_4R1_5_6_7_8_9_10R1_11_12_13_15_19_20R1_21R1_25	6	1	5	1R1-7-8|2R1-3R1-5-6-9-10R1-11-15-19|4R1-12-13|20R1|21R1|25	225000000	159900000	65100000	94800000	18
874	874T1	Unknown	Unknown	Matched	Clade_B	Clade_B-5	DFT1_2	DFT1_2	14114C>T	Campania	-42.664427000000003	147.42019500000001	2016	01/01/2016	DFT1	Tissue	No	Yes	Yes	Unknown				Singleton		0.32500000000000001	0.29299999999999998	0.51700000000000002	0.309	Yes	Yes	F	Unknown	No data			26	11	15	1R1_2R1_2R1BM33_3R1_3R1BM33_4R1_5_6_7_8_9_9BM33_10R1_10R1BM33_11_12_13_15_19_20R1_21R1_25_279_328_539_541	8	2	6	1R1-7-8|2R1-3R1-5-6-9-10R1-11-15-19|2R1BM33-3R1BM33-9BM33-10R1BM33-328-541|4R1-12-13|20R1|21R1|25|279-539	392200000	219500000	172700000	46800000	26
875	875T1	'16/1785	Unknown	Matched	Clade_A1	Clade_A1-3A1	DFT1_3	DFT1_3A1	1828A>G;3255G>A;14130G>A	Snug	-43.077604000000001	147.15378999999999	2016	24/04/2016	DFT1	Tissue	No	Yes	Yes	Facial/oral	Interior left lip at corner of mouth			Multiple		0.874	0.88	0.91500000000000004	0.877	Yes	Yes	M	3	No data	M5 loss		25	9	16	1R1_2R1_3R1_4R1_5_6_6BM4_7_8_9_10R1_11_11BM4_12_13_15_16R4_17R4_18R4_19_21R8_23_24_59R5_82R2	7	1	6	1R1-7-8|2R1-3R1-5-6-9-10R1-11-15-19|4R1-12-13|6BM4-11BM4-16R4-17R4-18R4|21R8|23-24|59R5-82R2	302307000	159900000	142407000	17493000	25
875	875T10	'16/1785	Unknown	Matched	Clade_A1	Clade_A1-3A1	DFT1_3	DFT1_3A1	1828A>G;3255G>A;14130G>A	Snug	-43.077604000000001	147.15378999999999	2016	24/04/2016	DFT1	Tissue	No	Yes	Yes	Facial/oral	Front lower palate			Multiple		0.30299999999999999	0.33300000000000002	0.52200000000000002	0.318	No	Yes	M	3	No data	M5 loss		26	9	17	1R1_2R1_3R1_4R1_5_6_6BM4_7_8_9_10R1_11_11BM4_12_13_15_16R4_17R4_18R4_19_21R8_23_24_59R5_82R2_944	8	1	7	1R1-7-8|2R1-3R1-5-6-9-10R1-11-15-19|4R1-12-13|6BM4-11BM4-16R4-17R4-18R4|21R8|23-24|59R5-82R2|944	303207000	159900000	143307000	16593000	26
875	875T2	'16/1785	Unknown	Matched	Clade_A1	Clade_A1-3A1	DFT1_3	DFT1_3A1	1828A>G;3255G>A;14130G>A	Snug	-43.077604000000001	147.15378999999999	2016	24/04/2016	DFT1	Tissue	No	Yes	Yes	Facial/oral	Interior upper left lip			Multiple		0.82399999999999995	0.83899999999999997	0.88600000000000001	0.83150000000000002	Yes	Yes	M	3	No data	M5 loss		25	9	16	1R1_2R1_3R1_4R1_5_6_6BM4_7_8_9_10R1_11_11BM4_12_13_15_16R4_17R4_18R4_19_21R8_23_24_59R5_82R2	7	1	6	1R1-7-8|2R1-3R1-5-6-9-10R1-11-15-19|4R1-12-13|6BM4-11BM4-16R4-17R4-18R4|21R8|23-24|59R5-82R2	302307000	159900000	142407000	17493000	25
875	875T3	'16/1785	Unknown	Matched	Clade_A1	Clade_A1-3A1	DFT1_3	DFT1_3A1	1828A>G;3255G>A;14130G>A	Snug	-43.077604000000001	147.15378999999999	2016	24/04/2016	DFT1	Tissue	No	Yes	Yes	Facial/oral	Interior upper left lip			Multiple		0.879	0.93	0.95399999999999996	0.90449999999999997	Yes	Yes	M	3	No data	M5 loss		25	9	16	1R1_2R1_3R1_4R1_5_6_6BM4_7_8_9_10R1_11_11BM4_12_13_15_16R4_17R4_18R4_19_21R8_23_24_59R5_82R2	7	1	6	1R1-7-8|2R1-3R1-5-6-9-10R1-11-15-19|4R1-12-13|6BM4-11BM4-16R4-17R4-18R4|21R8|23-24|59R5-82R2	302307000	159900000	142407000	17493000	25
875	875T4	'16/1785	Unknown	Matched	Clade_A1	Clade_A1-3A1	DFT1_3	DFT1_3A1	1828A>G;3255G>A;14130G>A	Snug	-43.077604000000001	147.15378999999999	2016	24/04/2016	DFT1	Tissue	No	Yes	Yes	Facial/oral	Upper palate			Multiple		0.80200000000000005	0.80900000000000005	0.91100000000000003	0.80549999999999999	Yes	Yes	M	3	No data	M5 loss		23	10	13	1R1_2R1_3R1_4R1_5_6_6BM4_7_8_9_10R1_11_11BM4_12_13_15_16R4_17R4_18R4_19_23_24_899	6	2	4	1R1-7-8|2R1-3R1-5-6-9-10R1-11-15-19|4R1-12-13|6BM4-11BM4-16R4-17R4-18R4|23-24|899	285307000	160800000	124507000	36293000	23
875	875T5	'16/1785	Unknown	Matched	Clade_A1	Clade_A1-3A1	DFT1_3	DFT1_3A1	1828A>G;3255G>A;14130G>A	Snug	-43.077604000000001	147.15378999999999	2016	24/04/2016	DFT1	Tissue	No	Yes	Yes	Facial/oral	Exterior front right lip			Multiple		0.61	0.66	0.82399999999999995	0.63500000000000001	Yes	Yes	M	3	No data	M5 loss		25	9	16	1R1_2R1_3R1_4R1_5_6_6BM4_7_8_9_10R1_11_11BM4_12_13_15_16R4_17R4_18R4_19_21R8_23_24_59R5_82R2	7	1	6	1R1-7-8|2R1-3R1-5-6-9-10R1-11-15-19|4R1-12-13|6BM4-11BM4-16R4-17R4-18R4|21R8|23-24|59R5-82R2	302307000	159900000	142407000	17493000	25
875	875T6	'16/1785	Unknown	Matched	Clade_A1	Clade_A1-3A1	DFT1_3	DFT1_3A1	1828A>G;3255G>A;14130G>A	Snug	-43.077604000000001	147.15378999999999	2016	24/04/2016	DFT1	Tissue	No	Yes	Yes	Facial/oral	Exterior left lip at corner of mouth			Multiple		0.77500000000000002	0.84899999999999998	0.90300000000000002	0.81200000000000006	Yes	Yes	M	3	No data	M5 loss		25	9	16	1R1_2R1_3R1_4R1_5_6_6BM4_7_8_9_10R1_11_11BM4_12_13_15_16R4_17R4_18R4_19_21R8_23_24_59R5_82R2	7	1	6	1R1-7-8|2R1-3R1-5-6-9-10R1-11-15-19|4R1-12-13|6BM4-11BM4-16R4-17R4-18R4|21R8|23-24|59R5-82R2	302307000	159900000	142407000	17493000	25
875	875T7	'16/1785	Unknown	Matched	Clade_A1	Clade_A1-3A1	DFT1_3	DFT1_3A1	1828A>G;3255G>A;14130G>A	Snug	-43.077604000000001	147.15378999999999	2016	24/04/2016	DFT1	Tissue	No	Yes	Yes	Facial/oral	Exterior left lip at corner of mouth			Multiple		0.82499999999999996	0.872	0.90100000000000002	0.84850000000000003	Yes	Yes	M	3	No data	M5 loss		22	9	13	1R1_2R1_3R1_4R1_5_6_6BM4_7_8_9_10R1_11_11BM4_12_13_15_16R4_17R4_18R4_19_23_24	5	1	4	1R1-7-8|2R1-3R1-5-6-9-10R1-11-15-19|4R1-12-13|6BM4-11BM4-16R4-17R4-18R4|23-24	284407000	159900000	124507000	35393000	22
875	875T8	'16/1785	Unknown	Matched	Clade_A1	Clade_A1-3A1	DFT1_3	DFT1_3A1	1828A>G;3255G>A;14130G>A	Snug	-43.077604000000001	147.15378999999999	2016	24/04/2016	DFT1	Tissue	No	Yes	Yes	Facial/oral	Left lower jaw towards neck			Multiple		0.68300000000000005	0.73299999999999998	0.80900000000000005	0.70799999999999996	Yes	Yes	M	3	No data	M5 loss		23	9	14	1R1_2R1_3R1_4R1_5_6_6BM4_7_8_9_10R1_11_11BM4_12_13_15_16R4_17R4_18R4_19_23_24_426R1	6	1	5	1R1-7-8|2R1-3R1-5-6-9-10R1-11-15-19|4R1-12-13|6BM4-11BM4-16R4-17R4-18R4|23-24|426R1	285307000	159900000	125407000	34493000	23
876	876T1	'16/0559	Unknown	Unmatched	Clade_B	Clade_B-1	DFT1_0	DFT1_0	Novariants	Ross	-42.069999000000003	147.49181799999999	2016	13/02/2016	DFT1	Tissue	No	Yes	Yes	Facial/oral				Multiple		0.91100000000000003	0.96	Not Available	0.9355	Yes	Yes	F	1	No data (confirmed)	M5 loss	Tetraploid (6)	27	10	17	1R1_2R1_3R1_4R1_5_6_6BM18_7_8_9_10R1_10R1BM31_11_11BM18_12_13_15_16R18_17R18_18R18_19_172_220_221_222_799_137	6	2	4	1R1-7-8|2R1-3R1-5-6-9-10R1-11-15-19|4R1-12-13|6BM18-11BM18-16R18-17R18-18R18-137-172-220-221-222|10R1BM31|799	273507000	161000000	112507000	48493000
876	876T2	'16/0559	Unknown	Unmatched	Clade_B	Clade_B-1	DFT1_0	DFT1_0	Novariants	Ross	-42.069999000000003	147.49181799999999	2016	13/02/2016	DFT1	Tissue	No	Yes	Yes	Facial/oral				Multiple		0.91100000000000003	0.94399999999999995	Not Available	0.92749999999999999	Yes	Yes	F	1	No data (confirmed)	M5 loss	Tetraploid (6)	27	9	18	1R1_2R1_3R1_4R1_5_6_6BM18_7_8_9_10R1_10R1BM31_11_11BM18_12_13_15_16R18_17R18_18R18_19_172_220_221_222_572_137	6	1	5	1R1-7-8|2R1-3R1-5-6-9-10R1-11-15-19|4R1-12-13|6BM18-11BM18-16R18-17R18-18R18-137-172-220-221-222|10R1BM31|572	273707000	159900000	113807000	46093000
877	877T1	'16/0681	Unknown	Unmatched	Clade_A1	Clade_A1-3A	DFT1_3	DFT1_3A	1828A>G;3255G>A	Huonville	-43.01829	147.063819	2016	Unknown	DFT1	Tissue	No	Yes	Yes	Unknown				Singleton		0.86499999999999999	0.91800000000000004	0.96299999999999997	0.89149999999999996	Yes	Yes	M	3	No data (confirmed)		Tetraploid (1)	21	12	9	1R1_2R1_3R1_4R1_5_6_7_8_9_10R1_11_12_13_15_19_23_24_69R2_202R1_421_819	8	4	4	1R1-7-8|2R1-3R1-5-6-9-10R1-11-15-19|4R1-12-13|23-24|69R2|202R1|421|819	515900000	388600000	127300000	261300000
878	878T1	'16/1808	'982000363392445	Matched	Clade_B	Clade_B-7	DFT1_2	DFT1_2F	14114C>T;14727G>A	Kempton	-42.525894000000001	147.20354900000001	2016	12/05/2016	DFT1	Tissue	No	Yes	Yes	Facial/oral	Right lower jaw near lip			Multiple		0.77600000000000002	0.76600000000000001	0.86599999999999999	0.77100000000000002	Yes	Yes	M	3	DFTD evolved			20	9	11	1R1_2R1_3R1_3R1BM35_3R1BM41_4R1_5_6_7_8_9_10R1_11_12_13_15_19_20R1_21R1_25	7	1	6	1R1-7-8|2R1-3R1-5-6-9-10R1-11-15-19|3R1BM35-3R1BM41|4R1-12-13|20R1|21R1|25	231200000	159900000	71300000	88600000	20
878	878T2	'16/1808	'982000363392445	Matched	Clade_B	Clade_B-7	DFT1_2	DFT1_2F	14114C>T;14727G>A	Kempton	-42.525894000000001	147.20354900000001	2016	12/05/2016	DFT1	Tissue	No	Yes	Yes	Facial/oral	Right lower jaw near neck			Multiple		0.49299999999999999	0.5	0.69799999999999995	0.4965	Yes	Yes	M	3	DFTD evolved			20	9	11	1R1_2R1_3R1_3R1BM35_3R1BM41_4R1_5_6_7_8_9_10R1_11_12_13_15_19_20R1_21R1_25	7	1	6	1R1-7-8|2R1-3R1-5-6-9-10R1-11-15-19|3R1BM35-3R1BM41|4R1-12-13|20R1|21R1|25	231200000	159900000	71300000	88600000	20
878	878T3	'16/1808	'982000363392445	Matched	Clade_B	Clade_B-7	DFT1_2	DFT1_2F	14114C>T;14727G>A	Kempton	-42.525894000000001	147.20354900000001	2016	12/05/2016	DFT1	Tissue	No	Yes	Yes	Facial/oral	Left lower jaw			Multiple		0.95199999999999996	0.93899999999999995	0.92	0.94550000000000001	Yes	Yes	M	3	No data			20	9	11	1R1_2R1_3R1_3R1BM35_3R1BM41_4R1_5_6_7_8_9_10R1_11_12_13_15_19_20R1_21R1_25	7	1	6	1R1-7-8|2R1-3R1-5-6-9-10R1-11-15-19|3R1BM35-3R1BM41|4R1-12-13|20R1|21R1|25	231200000	159900000	71300000	88600000	20
879	879T1	'16/1890	'982000363462228	Matched	Clade_B	Clade_B-8	DFT1_2	DFT1_2G	14114C>T;15896T>C	Bronte Park	-42.124875000000003	146.46679	2016	10/05/2016	DFT1	Tissue	No	Yes	Yes	Neck	Right hand side dorsal on neck between ears			Multiple		0.68600000000000005	0.70899999999999996	0.60499999999999998	0.69750000000000001	Yes	Yes	F	2	No data (confirmed)			24	13	11	1R1_2R1_3R1_4R1_5_6_7_8_9_10R1_11_12_13_15_19_20R1_21R1_25_47R2_89_89G1CN4_96_111_111G1CN4	8	2	6	1R1-7-8|2R1-3R1-5-6-9-10R1-11-15-19|4R1-12-13|20R1|21R1|25|47R2-96|89-89G1CN4-111-111G1CN4	300500000	166700000	133800000	32900000	24
879	879T2	'16/1890	'982000363462228	Matched	Clade_B	Clade_B-8	DFT1_2	DFT1_2	14114C>T	Bronte Park	-42.124875000000003	146.46679	2016	10/05/2016	DFT1	Tissue	No	Yes	Yes	Facial/oral	Right lower lip			Multiple		0.82099999999999995	0.85699999999999998	0.84799999999999998	0.83899999999999997	Yes	Yes	F	2	No data (confirmed)			24	13	11	1R1_2R1_3R1_4R1_5_6_7_8_9_10R1_11_12_13_15_19_20R1_21R1_25_47R2_89_89G1CN4_96_111_111G1CN4	8	2	6	1R1-7-8|2R1-3R1-5-6-9-10R1-11-15-19|4R1-12-13|20R1|21R1|25|47R2-96|89-89G1CN4-111-111G1CN4	300500000	166700000	133800000	32900000	24
879	879T3	'16/1890	'982000363462228	Matched	Clade_B	Clade_B-8	DFT1_2	DFT1_2	14114C>T	Bronte Park	-42.124875000000003	146.46679	2016	10/05/2016	DFT1	Tissue	No	Yes	Yes	Facial/oral	Right hand side ventral to eye			Multiple		0.90100000000000002	0.91	0.84199999999999997	0.90549999999999997	Yes	Yes	F	2	No data (confirmed)			25	13	12	1R1_2R1_3R1_4R1_5_6_7_8_9_10R1_11_12_13_15_19_20R1_21R1_25_47R2_89_89G1CN4_96_111_111G1CN4_321R1	9	2	7	1R1-7-8|2R1-3R1-5-6-9-10R1-11-15-19|4R1-12-13|20R1|21R1|25|47R2-96|89-89G1CN4-111-111G1CN4|321R1	311700000	166700000	145000000	21700000	25
879	879T4	'16/1890	'982000363462228	Matched	Clade_B	Clade_B-8	DFT1_2	DFT1_2	14114C>T	Bronte Park	-42.124875000000003	146.46679	2016	10/05/2016	DFT1	Tissue	No	Yes	Yes	Neck	Right hand side dorsal neck near right ear			Multiple		0.81699999999999995	0.83899999999999997	0.84499999999999997	0.82799999999999996	Yes	Yes	F	2	No data (confirmed)			24	13	11	1R1_2R1_3R1_4R1_5_6_7_8_9_10R1_11_12_13_15_19_20R1_21R1_25_47R2_89_89G1CN4_96_111_111G1CN4	8	2	6	1R1-7-8|2R1-3R1-5-6-9-10R1-11-15-19|4R1-12-13|20R1|21R1|25|47R2-96|89-89G1CN4-111-111G1CN4	300500000	166700000	133800000	32900000	24
879	879T5	'16/1890	'982000363462228	Matched	Clade_B	Clade_B-8	DFT1_2	DFT1_2	14114C>T	Bronte Park	-42.124875000000003	146.46679	2016	10/05/2016	DFT1	Tissue	No	Yes	Yes	Facial/oral	Left lower jaw			Multiple		0.79200000000000004	0.79900000000000004	0.89500000000000002	0.79549999999999998	Yes	Yes	F	2	No data (confirmed)			24	13	11	1R1_2R1_3R1_4R1_5_6_7_8_9_10R1_11_12_13_15_19_20R1_21R1_25_47R2_89_89G1CN4_96_111_111G1CN4	8	2	6	1R1-7-8|2R1-3R1-5-6-9-10R1-11-15-19|4R1-12-13|20R1|21R1|25|47R2-96|89-89G1CN4-111-111G1CN4	300500000	166700000	133800000	32900000	24
879	879T6	'16/1890	'982000363462228	Matched	Clade_B	Clade_B-8	DFT1_2	DFT1_2	14114C>T	Bronte Park	-42.124875000000003	146.46679	2016	10/05/2016	DFT1	Tissue	No	Yes	Yes	Unknown				Multiple		0.82699999999999996	0.85499999999999998	0.89800000000000002	0.84099999999999997	Yes	Yes	F	2	No data (confirmed)			26	13	13	1R1_2R1_3R1_4R1_5_6_7_8_9_9BM39_10R1_11_12_13_15_19_20R1_21R1_25_47R2_89_89G1CN4_96_111_111G1CN4_329	9	2	7	1R1-7-8|2R1-3R1-5-6-9-10R1-11-15-19|4R1-12-13|9BM39-329|20R1|21R1|25|47R2-96|89-89G1CN4-111-111G1CN4	383200000	166700000	216500000	-49800000	23
879	879T7	'16/1890	'982000363462228	Matched	Clade_B	Clade_B-8	DFT1_2	DFT1_2	14114C>T	Bronte Park	-42.124875000000003	146.46679	2016	10/05/2016	DFT1	Tissue	No	Yes	Yes	Pouch		Metastasis		Multiple		0.72199999999999998	0.78200000000000003	0.82399999999999995	0.752	Yes	Yes	F	2	No data (confirmed)			25	13	12	1R1_2R1_3R1_4R1_5_6_7_8_9_10R1_11_12_13_15_19_20R1_21R1_25_47R2_89_89G1CN4_96_111_111G1CN4_839	9	2	7	1R1-7-8|2R1-3R1-5-6-9-10R1-11-15-19|4R1-12-13|20R1|21R1|25|47R2-96|89-89G1CN4-111-111G1CN4|839	301400000	166700000	134700000	32000000	25
881	881T1	'16/2058	'982000405794404	Matched	Clade_B	Clade_B-9	DFT1_2	DFT1_2	14114C>T	Fentonbury	-42.653722000000002	146.76054099999999	2016	25/05/2016	DFT1	Tissue	No	Yes	Yes	Facial/oral	Right upper jaw			Multiple		0.26900000000000002	0.23200000000000001	0.56299999999999994	0.2505	Yes	Yes	M	2	No data (confirmed)			24	9	15	1R1_2R1_3R1_4R1_5_6_7_8_9_10R1_11_12_13_15_19_20R1_21R1_25_59R2_174_175R1_224_225_847	8	1	7	1R1-7-8|2R1-3R1-5-6-9-10R1-11-15-19|4R1-12-13|20R1|21R1|25|59R2|174-175R1-224-225-847	285300000	159900000	125400000	34500000	24
881	881T2	'16/2058	'982000405794404	Matched	Clade_B	Clade_B-9	DFT1_2	DFT1_2	14114C>T	Fentonbury	-42.653722000000002	146.76054099999999	2016	25/05/2016	DFT1	Tissue	No	Yes	Yes	Facial/oral	Right lower jaw			Multiple		0.66800000000000004	0.70199999999999996	0.78500000000000003	0.68500000000000005	Yes	Yes	M	2	No data (confirmed)			25	10	15	1R1_2R1_3R1_4R1_5_6_7_8_9_10R1_11_12_13_15_19_20R1_21R1_25_174_175R1_224_225_847_858_930	9	2	7	1R1-7-8|2R1-3R1-5-6-9-10R1-11-15-19|4R1-12-13|20R1|21R1|25|174-175R1-224-225-847|858|930	285300000	160700000	124600000	36100000	25
881	881T3	'16/2058	'982000405794404	Matched	Clade_B	Clade_B-9	DFT1_2	DFT1_2	14114C>T	Fentonbury	-42.653722000000002	146.76054099999999	2016	25/05/2016	DFT1	Tissue	No	Yes	Yes	Neck	Right hand side near neck			Multiple		0.433	0.55300000000000005	0.70599999999999996	0.49299999999999999	No	Yes	M	2	No data (confirmed)			24	9	15	1R1_2R1_3R1_4R1_5_6_7_8_9_10R1_11_12_13_15_19_20R1_21R1_25_174_175R1_224_225_847_972	8	1	7	1R1-7-8|2R1-3R1-5-6-9-10R1-11-15-19|4R1-12-13|20R1|21R1|25|174-175R1-224-225-847|972	285600000	159900000	125700000	34200000	24
922	922T1	'16/2414	'982000167811158	Matched	Clade_C	Clade_C-2	DFT1_0	DFT1_0	Novariants	Takone	-41.162607999999999	145.63892799999999	2016	17/06/2016	DFT1	Tissue	No	Yes	Yes	Facial/oral	Left upper lip			Multiple		0.11799999999999999	0.159	0.52300000000000002	0.13850000000000001	Yes	No	M	1	No data (confirmed)	No data
922	922T2	'16/2414	'982000167811158	Matched	Clade_C	Clade_C-2	DFT1_0	DFT1_0	Novariants	Takone	-41.162607999999999	145.63892799999999	2016	17/06/2016	DFT1	Tissue	No	Yes	Yes	Facial/oral	Left upper lip			Multiple		0.41699999999999998	0.44900000000000001	0.78200000000000003	0.433	Yes	Yes	M	1	No data (confirmed)			20	10	10	1R1_2R1_3R1_4R1_5_6_7_8_9_10R1_11_12_13_15_19_233_341_342_591_592	6	2	4	1R1-7-8|2R1-3R1-5-6-9-10R1-11-15-19|4R1-12-13|233-341|342-591|592	236300000	161400000	74900000	86500000	20
982	982T1	Unknown	'982000405794591	Matched	Clade_B	Clade_B-6	DFT1_0	DFT1_0	Novariants	Fentonbury	-42.653722000000002	146.76054099999999	2016	Unknown	DFT1	Tissue	No	Yes	Yes	Facial/oral	Interior right lower lip			Singleton		Not Available	0.79200000000000004	Not Available	0.79200000000000004	Yes	No	M	2	No data	No data
983	983T1	Unknown	'982000363404057	Matched	Clade_A2	Clade_A2-5	DFT1_0	DFT1_0	Novariants	Stony Head	-41.014394000000003	147.013229	2016	10/07/2016	DFT1	Tissue	No	Yes	Yes	Unknown				Multiple		0.53500000000000003	0.54800000000000004	Not Available	0.54149999999999998	Yes	Yes	M	4	No data (confirmed)	M5 loss	Tetraploid (4)	29	12	17	1R1_2R1_3R1_4R1_5_6_6BM13_7_8_9_10R1_11_11BM13_12_13_15_16R13_17R13_18R13_19_22_26_27R1_40R1_43R1_49R1_60_110_1022	9	2	7	1R1-7-8|2R1-3R1-5-6-9-10R1-11-15-19|4R1-12-13|6BM13-11BM13-16R13-17R13-18R13-60|22|26-27R1|40R1-43R1-49R1|110|1022	260448000	161841000	98607000	63234000
983	983T2	Unknown	'982000363404057	Matched	Clade_A2	Clade_A2-5	DFT1_0	DFT1_0	Novariants	Stony Head	-41.014394000000003	147.013229	2016	10/07/2016	DFT1	Tissue	No	Yes	Yes	Unknown				Multiple		0.54	0.58299999999999996	Not Available	0.5615	Yes	Yes	M	4	No data (confirmed)	M5 loss	Tetraploid (4)	28	12	16	1R1_2R1_3R1_4R1_5_6_6BM13_7_8_9_10R1_11_11BM13_12_13_15_16R13_17R13_18R13_19_22_26_27R1_40R1_43R1_49R1_60_110	8	2	6	1R1-7-8|2R1-3R1-5-6-9-10R1-11-15-19|4R1-12-13|6BM13-11BM13-16R13-17R13-18R13-60|22|26-27R1|40R1-43R1-49R1|110	258848000	161841000	97007000	64834000
985	985T1	'16/2156	'982000365467404	Unmatched	Clade_B	Clade_B-6	DFT1_0	DFT1_0	Novariants	Fentonbury	-42.653722000000002	146.76054099999999	2016	20/05/2016	DFT1	Tissue	No	Yes	Yes	Facial/oral	Left upper lip			Singleton		0.77900000000000003	0.74199999999999999	Not Available	0.76049999999999995	Yes	Yes	F	2	No data (confirmed)			19	9	10	1R1_2R1_3R1_4R1_5_6_7_8_9_10R1_11_12_13_15_19_20R1_21R1_25_50	7	1	6	1R1-7-8|2R1-3R1-5-6-9-10R1-11-15-19|4R1-12-13|20R1|21R1|25|50	236100000	159900000	76200000	83700000	19
986	986T1	'16/2165	'982000365504543	Unmatched	Clade_B	Clade_B-6	DFT1_0	DFT1_0	Novariants	Fentonbury	-42.653722000000002	146.76054099999999	2016	20/05/2016	DFT1	Tissue	No	Yes	Yes	Facial/oral	Right upper lip			Singleton		0.88100000000000001	0.86299999999999999	Not Available	0.872	Yes	Yes	F	2	No data (confirmed)			19	9	10	1R1_2R1_3R1_4R1_5_6_7_8_9_10R1_11_12_13_15_19_20R1_21R1_25_50	7	1	6	1R1-7-8|2R1-3R1-5-6-9-10R1-11-15-19|4R1-12-13|20R1|21R1|25|50	236100000	159900000	76200000	83700000	19
987	987T2	'16/2413	'900006000172391	Unmatched	Clade_C	Clade_C-3	DFT1_5	DFT1_5	2681C>T	Takone	-41.162607999999999	145.63892799999999	2016	17/06/2016	DFT1	Tissue	No	Yes	Yes	Facial/oral	Right upper lip			Singleton		0.40200000000000002	0.434	0.64300000000000002	0.41799999999999998	Yes	Yes	F	4	No data (confirmed)	M5 loss		22	10	12	1R1_2R1_3R1_4R1_5_6_6BM33_7_8_9_10R1_11_11BM33_12_13_15_16R33_17R33_18R33_19_55R2_620	6	2	4	1R1-7-8|2R1-3R1-5-6-9-10R1-11-15-19|4R1-12-13|6BM33-11BM33-16R33-17R33-18R33|55R2|620	239207000	160700000	78507000	82193000	22
989	989T1	Unknown	'982000405791464	Unmatched	Clade_B	Clade_B-5	DFT1_0	DFT1_0	Novariants	Buckland	-42.613394	147.70647	2016	25/06/2016	DFT1	Tissue	No	Yes	Yes	Facial/oral	Side of face above right eye			Singleton		Not Available	0.83799999999999997	Not Available	0.83799999999999997	Yes	No	M	1	No data	No data
990	990T1	'16/2163	'982000365130154	Unmatched	Clade_B	Clade_B-6	DFT1_0	DFT1_0	Novariants	Fentonbury	-42.653722000000002	146.76054099999999	2016	19/05/2016	DFT1	Tissue	No	Yes	Yes	Facial/oral	Left upper lip			Singleton		0.496	0.52900000000000003	0.77600000000000002	0.51249999999999996	Yes	Yes	F	2	No data (confirmed)			21	9	12	1R1_2R1_3R1_4R1_5_6_7_8_9_10R1_11_12_13_15_19_20R1_21R1_25_50_513_894	8	1	7	1R1-7-8|2R1-3R1-5-6-9-10R1-11-15-19|4R1-12-13|20R1|21R1|25|50|513-894	246000000	159900000	86100000	73800000	21
993	993T1.1	Unknown	Unknown	Matched	Clade_A1	Clade_A1-3A3	DFT1_3	DFT1_3A3a	1828A>G;2572G>A;3255G>A;16137G>A	Hobart (captive)	-	-	2015	13/04/2015	DFT1	Experimental transmission (cell-line)	Experimental transmission (cell-line; inoculation date: 26/11/2014)	Yes	No (experimental transmission)	Skin	Left rump			Multiple		0.81100000000000005	0.82099999999999995	0.73799999999999999	0.81599999999999995	Yes	Yes	F	Unknown	No data	M5 loss		57	32	25	1R1_2R1_2R1BM4_3R1_3R1BM4_4R1_5_5BM1_6_6BM6_7_8_9_9BM4_10R1_10R1BM4_11_11BM6_12_13_15_15BM4_16R6_17R6_18R6_19_23_24_33_34R4_35R4_36R4_37R4_38R4_39R4_40R2_40R2G1CN4_43R2_48R2_48R2G1CN4_49R2_49R2G1CN4_54R1_54R1G1CN4_73R1_73R1G1CN4_78R1_78R1G1CN4_84_85_85G1CN4_146_147_148_288_289_427	12	4	8	1R1-7-8|2R1-3R1-5-6-9-10R1-11-15-19|2R1BM4-3R1BM4-9BM4-10R1BM4-15BM4|4R1-12-13|5BM1-146-147-148|6BM6-11BM6-16R6-17R6-18R6|23-24|33|34R4-35R4-36R4-37R4-38R4-39R4|40R2-40R2G1CN4-43R2-48R2-48R2G1CN4-49R2-49R2G1CN4-54R1-54R1G1CN4-73R1-73R1G1CN4-78R1-78R1G1CN4-84-85-85G1CN4|288-289|427	669448000	333141000	336307000	-3166000	55
993	993T1.2	Unknown	Unknown	Matched	Clade_A1	Clade_A1-3A3	DFT1_3	DFT1_3A3a	1828A>G;2572G>A;3255G>A;16137G>A	Hobart (captive)	-	-	2015	12/05/2015	DFT1	Experimental transmission (cell-line)	Experimental transmission (cell-line; inoculation date: 26/11/2014)	Yes	No (experimental transmission)	Skin	Left rump			Multiple	Time-course	0.70799999999999996	0.71499999999999997	0.72099999999999997	0.71150000000000002	Yes	Yes	F	Unknown	No data	M5 loss		56	31	25	1R1_2R1_2R1BM4_3R1_3R1BM4_4R1_5_5BM1_6_6BM6_7_8_9_9BM4_10R1_10R1BM4_11_11BM6_12_13_15_15BM4_16R6_17R6_18R6_19_23_24_33_34R4_35R4_36R4_37R4_38R4_39R4_40R2_40R2G1CN4_43R2_48R2_48R2G1CN4_49R2_49R2G1CN4_54R1_54R1G1CN4_73R1_73R1G1CN4_78R1_78R1G1CN4_84_85_85G1CN4_146_147_148_288_289	11	3	8	1R1-7-8|2R1-3R1-5-6-9-10R1-11-15-19|2R1BM4-3R1BM4-9BM4-10R1BM4-15BM4|4R1-12-13|5BM1-146-147-148|6BM6-11BM6-16R6-17R6-18R6|23-24|33|34R4-35R4-36R4-37R4-38R4-39R4|40R2-40R2G1CN4-43R2-48R2-48R2G1CN4-49R2-49R2G1CN4-54R1-54R1G1CN4-73R1-73R1G1CN4-78R1-78R1G1CN4-84-85-85G1CN4|288-289	668448000	332141000	336307000	-4166000	54
994	994T1.1	Unknown	Unknown	Matched	Clade_A1	Clade_A1-3A3	DFT1_3	DFT1_3A3a	1828A>G;2572G>A;3255G>A;16137G>A	Hobart (captive)	-	-	2015	04/03/2015	DFT1	Experimental transmission (cell-line)	Experimental transmission (cell-line; inoculation date: 26/11/2014)	Yes	No (experimental transmission)	Skin	Rump			Multiple		0.92400000000000004	0.94799999999999995	0.93200000000000005	0.93600000000000005	Yes	Yes	M	Unknown	No data	M5 loss		57	31	26	1R1_2R1_2R1BM4_3R1_3R1BM4_4R1_5_5BM1_6_6BM6_7_8_9_9BM4_10R1_10R1BM4_11_11BM6_12_13_15_15BM4_16R6_17R6_18R6_19_23_24_33_34R4_35R4_36R4_37R4_38R4_39R4_40R2_40R2G1CN4_43R2_48R2_48R2G1CN4_49R2_49R2G1CN4_54R1_54R1G1CN4_73R1_73R1G1CN4_78R1_78R1G1CN4_84_85_85G1CN4_146_147_148_288_289_1805	12	3	9	1R1-7-8|2R1-3R1-5-6-9-10R1-11-15-19|2R1BM4-3R1BM4-9BM4-10R1BM4-15BM4|4R1-12-13|5BM1-146-147-148|6BM6-11BM6-16R6-17R6-18R6|23-24|33|34R4-35R4-36R4-37R4-38R4-39R4|40R2-40R2G1CN4-43R2-48R2-48R2G1CN4-49R2-49R2G1CN4-54R1-54R1G1CN4-73R1-73R1G1CN4-78R1-78R1G1CN4-84-85-85G1CN4|288-289|1805	669448000	332141000	337307000	-5166000	57
995	995T1.1	Unknown	Unknown	Matched	Clade_A1	Clade_A1-3A3	DFT1_3	DFT1_3A3a	1828A>G;2572G>A;3255G>A;16137G>A	Hobart (captive)	-	-	2015	13/04/2015	DFT1	Experimental transmission (cell-line)	Experimental transmission (cell-line; inoculation date: 03/02/2015)	Yes	No (experimental transmission)	Skin	Left rump			Multiple		0.92700000000000005	0.91500000000000004	0.94	0.92100000000000004	Yes	Yes	F	Unknown	No data	M5 loss		56	31	25	1R1_2R1_2R1BM4_3R1_3R1BM4_4R1_5_6_6BM6_7_8_9_9BM4_10R1_10R1BM4_11_11BM6_12_13_15_15BM4_16R6_17R6_18R6_19_23_24_33_34R4_35R4_36R4_37R4_38R4_39R4_40R2_40R2G1CN4_43R2_48R2_48R2G1CN4_49R2_49R2G1CN4_52R1_53R2_54R1_54R1G1CN4_73R1_73R1G1CN4_78R1_78R1G1CN4_84_85_85G1CN4_290_291R1_292_293	10	3	7	1R1-7-8|2R1-3R1-5-6-9-10R1-11-15-19|2R1BM4-3R1BM4-9BM4-10R1BM4-15BM4|4R1-12-13|6BM6-11BM6-16R6-17R6-18R6|23-24|33|34R4-35R4-36R4-37R4-38R4-39R4|40R2-40R2G1CN4-43R2-48R2-48R2G1CN4-49R2-49R2G1CN4-54R1-54R1G1CN4-73R1-73R1G1CN4-78R1-78R1G1CN4-84-85-85G1CN4|52R1-53R2-290-291R1-292-293	626748000	332141000	294607000	37534000	50
995	995T1.2	Unknown	Unknown	Matched	Clade_A1	Clade_A1-3A3	DFT1_3	DFT1_3A3a	1828A>G;2572G>A;3255G>A;16137G>A	Hobart (captive)	-	-	2015	08/05/2015	DFT1	Experimental transmission (cell-line)	Experimental transmission (cell-line; inoculation date: 03/02/2015)	Yes	No (experimental transmission)	Skin	Left rump			Multiple	Time-course	0.93300000000000005	0.96	0.95899999999999996	0.94650000000000001	Yes	Yes	F	Unknown	No data	M5 loss		57	31	26	1R1_2R1_2R1BM4_3R1_3R1BM4_4R1_5_6_6BM6_7_8_9_9BM4_10R1_10R1BM4_11_11BM6_12_13_15_15BM4_16R6_17R6_18R6_19_23_24_33_34R4_35R4_36R4_37R4_38R4_39R4_40R2_40R2G1CN4_43R2_48R2_48R2G1CN4_49R2_49R2G1CN4_52R1_53R2_54R1_54R1G1CN4_73R1_73R1G1CN4_78R1_78R1G1CN4_84_85_85G1CN4_290_291R1_292_293_294R2	11	3	8	1R1-7-8|2R1-3R1-5-6-9-10R1-11-15-19|2R1BM4-3R1BM4-9BM4-10R1BM4-15BM4|4R1-12-13|6BM6-11BM6-16R6-17R6-18R6|23-24|33|34R4-35R4-36R4-37R4-38R4-39R4|40R2-40R2G1CN4-43R2-48R2-48R2G1CN4-49R2-49R2G1CN4-54R1-54R1G1CN4-73R1-73R1G1CN4-78R1-78R1G1CN4-84-85-85G1CN4|52R1-53R2-290-291R1-292-293|294R2	651448000	332141000	319307000	12834000	50
996	996T1	Unknown	Unknown	Matched	Clade_A1	Clade_A1-3A3	DFT1_3	DFT1_3A3a	1828A>G;2572G>A;3255G>A;16137G>A	Hobart (captive)	-	-	2015	08/05/2015	DFT1	Experimental transmission (cell-line)	Experimental transmission (cell-line; inoculation date: 03/02/2015)	Yes	No (experimental transmission)	Skin	Left rump			Multiple		0.78	0.78	0.89700000000000002	0.78	Yes	Yes	M	Unknown	No data	M5 loss		50	31	19	1R1_2R1_2R1BM4_3R1_3R1BM4_4R1_5_6_6BM6_7_8_9_9BM4_10R1_10R1BM4_11_11BM6_12_13_15_15BM4_16R6_17R6_18R6_19_23_24_33_34R4_35R4_36R4_37R4_38R4_39R4_40R2_40R2G1CN4_43R2_48R2_48R2G1CN4_49R2_49R2G1CN4_54R1_54R1G1CN4_73R1_73R1G1CN4_78R1_78R1G1CN4_84_85_85G1CN4	9	3	6	1R1-7-8|2R1-3R1-5-6-9-10R1-11-15-19|2R1BM4-3R1BM4-9BM4-10R1BM4-15BM4|4R1-12-13|6BM6-11BM6-16R6-17R6-18R6|23-24|33|34R4-35R4-36R4-37R4-38R4-39R4|40R2-40R2G1CN4-43R2-48R2-48R2G1CN4-49R2-49R2G1CN4-54R1-54R1G1CN4-73R1-73R1G1CN4-78R1-78R1G1CN4-84-85-85G1CN4	610848000	332141000	278707000	53434000	50
996	996T2	Unknown	Unknown	Matched	Clade_A1	Clade_A1-3A3	DFT1_3	DFT1_3A3a	1828A>G;2572G>A;3255G>A;16137G>A	Hobart (captive)	-	-	2015	08/05/2015	DFT1	Experimental transmission (cell-line)	Experimental transmission (cell-line; inoculation date: 03/02/2015)	Yes	No (experimental transmission)	Skin	Interscapular			Multiple		0.871	0.88900000000000001	0.88	0.88	Yes	Yes	M	Unknown	No data	M5 loss		57	31	26	1R1_2R1_2R1BM4_3R1_3R1BM4_4R1_5_6_6BM6_7_8_9_9BM4_10R1_10R1BM4_11_11BM6_12_13_15_15BM4_16R6_17R6_18R6_19_23_24_33_34R4_35R4_36R4_37R4_38R4_39R4_40R2_40R2G1CN4_43R2_48R2_48R2G1CN4_49R2_49R2G1CN4_52R1_53R2_54R1_54R1G1CN4_73R1_73R1G1CN4_78R1_78R1G1CN4_84_85_85G1CN4_290_291R1_292_293_973	11	3	8	1R1-7-8|2R1-3R1-5-6-9-10R1-11-15-19|2R1BM4-3R1BM4-9BM4-10R1BM4-15BM4|4R1-12-13|6BM6-11BM6-16R6-17R6-18R6|23-24|33|34R4-35R4-36R4-37R4-38R4-39R4|40R2-40R2G1CN4-43R2-48R2-48R2G1CN4-49R2-49R2G1CN4-54R1-54R1G1CN4-73R1-73R1G1CN4-78R1-78R1G1CN4-84-85-85G1CN4|52R1-53R2-290-291R1-292-293|973	627648000	332141000	295507000	36634000	57
997	997T1	Unknown	Unknown	Matched	Non-DFTD	Non-DFTD	Non-DFTD	Non-DFTD	-	Hobart (captive)	-	-	2013	11/05/2013	Non-DFTD	Tissue	No	No (not DFT1)	No (not DFT1)	Anal sac			Carcinoma (anal sac squamous cell)	Singleton		Not Available	Not Available	Not Available	N/A	No	Yes	F	Unknown	Non-DFTD			174	140	34	2R3_232_523R2_1675_1677_1678_1679_1680_1681_1682_1683_1684_1685_1686_1687_1688_1689_1690_1691_1692_1693_1693G1CN4_1693G1CN5_1693G1CN6_1694_1695_1696_1697_1698_1699_1700_1701_1701G1CN4_1701G1CN5_1701G1CN6_1701G1CN7_1701G1CN8_1701G1CN9_1701G1CN10_1702_1703_1703G1CN4_1703G2CN5_1704_1705_1706_1707_1707G1CN4_1708_1708G1CN4_1708G1CN5_1709_1709G1CN4_1709G1CN5_1710_1710G1CN4_1710G1CN5_1710G1CN6_1711_1711…	2	1	1	2R3-523R2-1678-1682-1683-1684-1685-1686-1687-1688-1691-1693-1693G1CN4-1693G1CN5-1693G1CN6-1694-1696-1697-1698-1699-1701-1701G1CN4-1701G1CN5-1701G1CN6-1701G1CN7-1701G1CN8-1701G1CN9-1701G1CN10-1703-1703G1CN4-1703G2CN5-1705-1707-1707G1CN4-1708-1708G1CN4-1708G1CN5-1709-1709G1CN4-1709G1CN5-1710-1710G1CN4-1710G1CN5-1710G1CN6-1711-1711G1CN4-1714-1714G1CN4-1715-1715G1CN4-1715G1CN5-1716-1718-1721-1721G1CN…	1248600000	838300000	410300000	428000000	138
998	998T1	Unknown	Unknown	Matched	Clade_A2	Clade_A2-6	DFT1_6	DFT1_6	3161G>A	Hastings	-43.425261999999996	146.938524	2016	21/07/2016	DFT1	Tissue	No	Yes	Yes	Facial/oral	Front lower lip			Singleton		0.94499999999999995	0.94599999999999995	0.95299999999999996	0.94550000000000001	Yes	Yes	M	2	No data			21	12	9	1R1_2R1_3R1_4R1_5_6_7_8_9_10R1_11_12_13_15_15G2CN4_19_22_26_27R1_313G1CN4_316G1CN4	6	2	4	1R1-7-8|2R1-3R1-5-6-9-10R1-11-15-19|4R1-12-13|15G2CN4-313G1CN4-316G1CN4|22|26-27R1	288500000	206300000	82200000	124100000	21
999	999T1	Unknown	Unknown	Matched	Clade_A1	Clade_A1-3A1	DFT1_3	DFT1_3A1	1828A>G;3255G>A;14130G>A	Lower Longley	-42.904758000000001	147.085824	2016	25/08/2016	DFT1	Tissue	No	Yes	Yes	Facial/oral				Multiple		0.871	0.88400000000000001	0.92	0.87749999999999995	Yes	Yes	F	Unknown	No data			25	10	15	1R1_2R1_3R1_4R1_5_6_7_8_9_10R1_11_12_13_15_19_23_24_42R1_59R1_72_77_82R1_92_122R1_340	8	2	6	1R1-7-8|2R1-3R1-5-6-9-10R1-11-15-19|4R1-12-13|23-24|42R1-59R1-82R1-122R1-340|72|77|92	304400000	160900000	143500000	17400000	25
999	999T2	Unknown	Unknown	Matched	Clade_A1	Clade_A1-3A1	DFT1_3	DFT1_3A1	1828A>G;3255G>A;14130G>A	Lower Longley	-42.904758000000001	147.085824	2016	25/08/2016	DFT1	Tissue	No	Yes	Yes	Facial/oral				Multiple		0.88700000000000001	0.90500000000000003	0.92200000000000004	0.89600000000000002	Yes	Yes	F	Unknown	No data			25	10	15	1R1_2R1_3R1_4R1_5_6_7_8_9_10R1_11_12_13_15_19_23_24_42R1_59R1_72_77_82R1_92_122R1_340	8	2	6	1R1-7-8|2R1-3R1-5-6-9-10R1-11-15-19|4R1-12-13|23-24|42R1-59R1-82R1-122R1-340|72|77|92	304400000	160900000	143500000	17400000	25
999	999T3	Unknown	Unknown	Matched	Clade_A1	Clade_A1-3A1	DFT1_3	DFT1_3A1	1828A>G;3255G>A;14130G>A	Lower Longley	-42.904758000000001	147.085824	2016	25/08/2016	DFT1	Tissue	No	Yes	Yes	Facial/oral				Multiple		0.85199999999999998	0.86899999999999999	0.91900000000000004	0.86050000000000004	Yes	Yes	F	Unknown	No data			25	10	15	1R1_2R1_3R1_4R1_5_6_7_8_9_10R1_11_12_13_15_19_23_24_42R1_59R1_72_77_82R1_92_122R1_340	8	2	6	1R1-7-8|2R1-3R1-5-6-9-10R1-11-15-19|4R1-12-13|23-24|42R1-59R1-82R1-122R1-340|72|77|92	304400000	160900000	143500000	17400000	25
999	999T6	Unknown	Unknown	Matched	Clade_A1	Clade_A1-3A1	DFT1_3	DFT1_3A1	1828A>G;3255G>A;14130G>A	Lower Longley	-42.904758000000001	147.085824	2016	25/08/2016	DFT1	Tissue	No	Yes	Yes	Facial/oral				Multiple		0.95	0.96299999999999997	0.95299999999999996	0.95650000000000002	Yes	Yes	F	Unknown	No data			25	10	15	1R1_2R1_3R1_4R1_5_6_7_8_9_10R1_11_12_13_15_19_23_24_42R1_59R1_72_77_82R1_92_122R1_340	8	2	6	1R1-7-8|2R1-3R1-5-6-9-10R1-11-15-19|4R1-12-13|23-24|42R1-59R1-82R1-122R1-340|72|77|92	304400000	160900000	143500000	17400000	25
1000	1000T1.1	Unknown	'982000363393469	Matched	Clade_A2	Clade_A2-2	DFT1_12	DFT1_12	8374G>A	Hobart	-42.850665999999997	147.38239899999999	2016	23/09/2016	DFT1	Tissue	No	Yes	Yes	Facial/oral	Lower front right lip			Multiple		0.78700000000000003	0.76600000000000001	0.82299999999999995	0.77649999999999997	Yes	Yes	F	Unknown	No data	M5 loss		22	9	13	1R1_2R1_3R1_4R1_5_6_6BM8_7_8_9_10R1_11_11BM8_12_13_15_16R8_17R8_18R8_19_22_117	5	1	4	1R1-7-8|2R1-3R1-5-6-9-10R1-11-15-19|4R1-12-13|6BM8-11BM8-16R8-17R8-18R8-117|22	260407000	159900000	100507000	59393000	22
1000	1000T1a	Unknown	'982000363393469	Matched	Clade_A2	Clade_A2-3	DFT1_0	DFT1_0	Novariants	Hobart	-42.850665999999997	147.38239899999999	2016	13/09/2016	DFT1	Tissue	No	Yes	Yes	Facial/oral	Lower front right lip			Multiple		0.496	0.496	Not Available	0.496	Yes	Yes	F	Unknown	No data			22	10	12	1R1_2R1_3R1_4R1_5_6_7_8_9_10R1_11_12_13_15_19_22_26_27R1_312R1_625_808_1021	8	2	6	1R1-7-8|2R1-3R1-5-6-9-10R1-11-15-19|4R1-12-13|22|26-27R1|312R1|625|808-1021	248600000	161000000	87600000	73400000	22
1000	1000T3	Unknown	'982000363393469	Matched	Clade_A2	Clade_A2-3	DFT1_0	DFT1_0	Novariants	Hobart	-42.850665999999997	147.38239899999999	2016	23/09/2016	DFT1	Tissue	No	Yes	Yes	Unknown				Multiple		0.53100000000000003	0.308	Not Available	0.41949999999999998	Yes	Yes	F	Unknown	No data			21	9	12	1R1_2R1_3R1_4R1_5_6_7_8_9_10R1_11_12_13_15_19_22_26_27R1_625_808_1021	7	1	6	1R1-7-8|2R1-3R1-5-6-9-10R1-11-15-19|4R1-12-13|22|26-27R1|625|808-1021	247500000	159900000	87600000	72300000	21
1001	1001T1	Unknown	'982000191008016	Matched	Clade_B	Clade_B-10	DFT1_2	DFT1_2	14114C>T	West Pencil Pine	-41.717464999999997	145.85587000000001	2013	01/11/2013	DFT1	Tissue	No	Yes	Yes	Unknown				Singleton		0.83	0.82299999999999995	0.876	0.82650000000000001	Yes	Yes	M	1	No data (confirmed)			18	9	9	1R1_2R1_3R1_4R1_5_6_7_8_9_10R1_11_12_13_15_19_20R1_21R1_25	6	1	5	1R1-7-8|2R1-3R1-5-6-9-10R1-11-15-19|4R1-12-13|20R1|21R1|25	225000000	159900000	65100000	94800000	18
1002	1002T1	Unknown	'982009104789608	Matched	Clade_A2	Clade_A2-11	DFT1_0	DFT1_0	Novariants	West Pencil Pine	-41.717464999999997	145.85587000000001	2012	01/02/2012	DFT1	Tissue	No	Yes	Yes	Unknown				Singleton		0.88600000000000001	0.89600000000000002	Not Available	0.89100000000000001	Yes	Yes	M	3	Strain 1	M5 loss		33	19	14	1R1_2R1_3R1_4R1_5_5G1CN4_5G1CN5_6_6BM17_7_8_9_10R1_11_11BM17_12_13_15_16R17_17R17_18R17_19_22_26_27R1_28R1_28R1G1CN4_29_29G1CN4_31_32_1834_1834G1CN4	9	4	5	1R1-7-8|2R1-3R1-5-6-9-10R1-11-15-19|4R1-12-13|5G1CN4-28R1-29-31-32-1834|5G1CN5|6BM17-11BM17-16R17-17R17-18R17|22|26-27R1|28R1G1CN4-29G1CN4-1834G1CN4	261107000	170700000	90407000	80293000	33
1003	1003T1	Unknown	'982000356429834	Matched	Clade_B	Clade_B-10	DFT1_2	DFT1_2	14114C>T	West Pencil Pine	-41.717464999999997	145.85587000000001	2015	01/11/2015	DFT1	Tissue	No	Yes	Yes	Unknown				Singleton		0.78700000000000003	0.78300000000000003	0.80400000000000005	0.78500000000000003	Yes	Yes	F	1	No data (confirmed)			24	14	10	1R1_2R1_3R1_4R1_5_6_7_8_9_10R1_11_12_13_15_19_20R1_21R1_25_180_180G1CN4_181_181G1CN4_182_547	8	2	6	1R1-7-8|2R1-3R1-5-6-9-10R1-11-15-19|4R1-12-13|20R1|21R1|25|180-180G1CN4-181-181G1CN4-182|547	230500000	164900000	65600000	99300000	24
1004	1004T1	Unknown	'982000356574585	Matched	Clade_A2	Clade_A2-11	DFT1_0	DFT1_0	Novariants	West Pencil Pine	-41.717464999999997	145.85587000000001	2016	01/05/2016	DFT1	Tissue	No	Yes	Yes	Unknown				Multiple		0.71	0.74099999999999999	Not Available	0.72550000000000003	Yes	Yes	F	2	No data (confirmed)	M5 loss		33	19	14	1R1_2R1_3R1_4R1_5_5G1CN4_5G1CN5_6_6BM17_7_8_9_10R1_11_11BM17_12_13_15_16R17_17R17_18R17_19_22_26_27R1_28R1_28R1G1CN4_29_29G1CN4_31_32_1834_1834G1CN4	9	4	5	1R1-7-8|2R1-3R1-5-6-9-10R1-11-15-19|4R1-12-13|5G1CN4-28R1-29-31-32-1834|5G1CN5|6BM17-11BM17-16R17-17R17-18R17|22|26-27R1|28R1G1CN4-29G1CN4-1834G1CN4	261107000	170700000	90407000	80293000	33
1004	1004T2	Unknown	'982000356574585	Matched	Clade_A2	Clade_A2-11	DFT1_0	DFT1_0	Novariants	West Pencil Pine	-41.717464999999997	145.85587000000001	2016	01/05/2016	DFT1	Tissue	No	Yes	Yes	Unknown				Multiple		0.182	0.156	0.64200000000000002	0.16900000000000001	Yes	No	F	2	No data (confirmed)	No data
1005	1005T1	Unknown	'982000167783273	Matched	Clade_A2	Clade_A2-11	DFT1_0	DFT1_0	Novariants	West Pencil Pine	-41.717464999999997	145.85587000000001	2014	01/11/2014	DFT1	Tissue	No	Yes	Yes	Unknown				Singleton		0.66100000000000003	Not Available	Not Available	0.66100000000000003	Yes	Yes	F	1	No data (confirmed)	M5 loss		33	19	14	1R1_2R1_3R1_4R1_5_5G1CN4_5G1CN5_6_6BM17_7_8_9_10R1_11_11BM17_12_13_15_16R17_17R17_18R17_19_22_26_27R1_28R1_28R1G1CN4_29_29G1CN4_31_32_1834_1834G1CN4	9	4	5	1R1-7-8|2R1-3R1-5-6-9-10R1-11-15-19|4R1-12-13|5G1CN4-28R1-29-31-32-1834|5G1CN5|6BM17-11BM17-16R17-17R17-18R17|22|26-27R1|28R1G1CN4-29G1CN4-1834G1CN4	261107000	170700000	90407000	80293000	33
1006	1006T1	Unknown	'982000167813037	Matched (MIPs Only)	Clade_A2	Clade_A2-11	DFT1_0	DFT1_0	Novariants	West Pencil Pine	-41.717464999999997	145.85587000000001	2012	01/11/2012	DFT1	Tissue	No	Yes	Yes	Unknown				Singleton		0.56100000000000005	0.55800000000000005	0.748	0.5595	Yes	Yes	M	1	Strain 1	M5 loss		33	19	14	1R1_2R1_3R1_4R1_5_5G1CN4_5G1CN5_6_6BM17_7_8_9_10R1_11_11BM17_12_13_15_16R17_17R17_18R17_19_22_26_27R1_28R1_28R1G1CN4_29_29G1CN4_31_32_1834_1834G1CN4	9	4	5	1R1-7-8|2R1-3R1-5-6-9-10R1-11-15-19|4R1-12-13|5G1CN4-28R1-29-31-32-1834|5G1CN5|6BM17-11BM17-16R17-17R17-18R17|22|26-27R1|28R1G1CN4-29G1CN4-1834G1CN4	261107000	170700000	90407000	80293000	33
1007	1007T1	Unknown	'982000190533626	Matched	Clade_B	Clade_B-10	DFT1_2	DFT1_2B1	14114C>T;12362G>A;14412G>A	West Pencil Pine	-41.717464999999997	145.85587000000001	2014	01/02/2014	DFT1	Tissue	No	Yes	Yes	Unknown				Singleton		0.41499999999999998	0.371	0.63600000000000001	0.39300000000000002	Yes	Yes	M	2	No data (confirmed)			18	9	9	1R1_2R1_3R1_4R1_5_6_7_8_9_10R1_11_12_13_15_19_20R1_21R1_25	6	1	5	1R1-7-8|2R1-3R1-5-6-9-10R1-11-15-19|4R1-12-13|20R1|21R1|25	225000000	159900000	65100000	94800000	18
1008	1008T1	Unknown	'982000167808001	Matched	Clade_A2	Clade_A2-11	DFT1_0	DFT1_0	Novariants	West Pencil Pine	-41.717464999999997	145.85587000000001	2014	01/11/2014	DFT1	Tissue	No	Yes	Yes	Unknown				Singleton		0.32900000000000001	0.28899999999999998	0.7	0.309	Yes	Yes	M	1	No data (confirmed)	M5 loss		33	19	14	1R1_2R1_3R1_4R1_5_5G1CN4_5G1CN5_6_6BM17_7_8_9_10R1_11_11BM17_12_13_15_16R17_17R17_18R17_19_22_26_27R1_28R1_28R1G1CN4_29_29G1CN4_31_32_1834_1834G1CN4	9	4	5	1R1-7-8|2R1-3R1-5-6-9-10R1-11-15-19|4R1-12-13|5G1CN4-28R1-29-31-32-1834|5G1CN5|6BM17-11BM17-16R17-17R17-18R17|22|26-27R1|28R1G1CN4-29G1CN4-1834G1CN4	261107000	170700000	90407000	80293000	33
1009	1009T1	Unknown	'982009104798071	Matched	Clade_C	Clade_C-3	DFT1_5	DFT1_5	2681C>T	West Pencil Pine	-41.717464999999997	145.85587000000001	2011	01/07/2011	DFT1	Tissue	No	Yes (italicised)	Yes	Unknown				Singleton		0.17699999999999999	0.152	0.47	0.16450000000000001	No	No	M	3	No data (confirmed)	No data
1010	1010T1	Unknown	'982000167781717	Matched	Clade_A2	Clade_A2-10	DFT1_22	DFT1_22	16143G>A	West Pencil Pine	-41.717464999999997	145.85587000000001	2012	01/08/2012	DFT1	Tissue	No	Yes	Yes	Unknown				Singleton		0.56899999999999995	0.60199999999999998	0.82599999999999996	0.58550000000000002	Yes	Yes	F	1	Strain 1 tetraploid, strain 2 tetraploid	M5 loss		35	20	15	1R1_2R1_3R1_4R1_5_6_6BM17_7_8_9_10R1_10R1G1CN4_10R1G1CN5_11_11BM17_12_13_15_15G1CN4_15G1CN5_16R17_17R17_18R17_19_22_26_27R1_93G1CN4_93G1CN5_93G1CN6_93G1CN7_93G1CN8_102G1CN4_102G1CN5_1827	12	6	6	1R1-7-8|2R1-3R1-5-6-9-10R1-11-15-19|4R1-12-13|6BM17-11BM17-16R17-17R17-18R17|10R1G1CN4-15G1CN4-93G1CN4-93G1CN5-102G1CN4|10R1G1CN5-15G1CN5-102G1CN5|22|26-27R1|93G1CN6|93G1CN7|93G1CN8|1827	270407000	177800000	92607000	85193000	35
1011	1011T1	Unknown	'982000167789148	Matched	Clade_A2	Clade_A2-11	DFT1_0	DFT1_0	Novariants	West Pencil Pine	-41.717464999999997	145.85587000000001	2012	01/05/2012	DFT1	Tissue	No	Yes	Yes	Unknown				Multiple		0.89	0.89800000000000002	Not Available	0.89400000000000002	Yes	Yes	M	3	Strain 1	M5 loss		33	19	14	1R1_2R1_3R1_4R1_5_5G1CN4_5G1CN5_6_6BM17_7_8_9_10R1_11_11BM17_12_13_15_16R17_17R17_18R17_19_22_26_27R1_28R1_28R1G1CN4_29_29G1CN4_31_32_1834_1834G1CN4	9	4	5	1R1-7-8|2R1-3R1-5-6-9-10R1-11-15-19|4R1-12-13|5G1CN4-28R1-29-31-32-1834|5G1CN5|6BM17-11BM17-16R17-17R17-18R17|22|26-27R1|28R1G1CN4-29G1CN4-1834G1CN4	261107000	170700000	90407000	80293000	33
1011	1011T2	Unknown	'982000167789148	Matched	Clade_A2	Clade_A2-11	DFT1_33	DFT1_33	2146A>G	West Pencil Pine	-41.717464999999997	145.85587000000001	2012	01/05/2012	DFT1	Tissue	No	Yes	Yes	Unknown				Multiple		0.38	0.35499999999999998	0.51900000000000002	0.36749999999999999	Yes	Yes	M	3	Strain 1	M5 loss		33	19	14	1R1_2R1_3R1_4R1_5_5G1CN4_6_6BM17_7_8_9_10R1_11_11BM17_12_13_15_16R17_17R17_18R17_19_22_26_27R1_28R1_28R1G1CN4_29_29G1CN4_31_32_340R3_1834_1834G1CN4	9	4	5	1R1-7-8|2R1-3R1-5-6-9-10R1-11-15-19|4R1-12-13|5G1CN4-28R1-29-31-32-1834|6BM17-11BM17-16R17-17R17-18R17|22|26-27R1|28R1G1CN4-29G1CN4-1834G1CN4|340R3	261107000	170700000	90407000	80293000	33
1011	1011T3	Unknown	'982000167789148	Matched	Clade_A2	Clade_A2-11	DFT1_0	DFT1_0	Novariants	West Pencil Pine	-41.717464999999997	145.85587000000001	2012	01/05/2012	DFT1	Tissue	No	Yes	Yes	Unknown				Multiple		0.441	0.46400000000000002	0.77800000000000002	0.45250000000000001	Yes	Yes	M	3	Strain 1	M5 loss		33	19	14	1R1_2R1_3R1_4R1_5_5G1CN4_6_6BM17_7_8_9_10R1_11_11BM17_12_13_15_16R17_17R17_18R17_19_22_26_27R1_28R1_28R1G1CN4_29_29G1CN4_31_32_340R3_1834_1834G1CN4	9	4	5	1R1-7-8|2R1-3R1-5-6-9-10R1-11-15-19|4R1-12-13|5G1CN4-28R1-29-31-32-1834|6BM17-11BM17-16R17-17R17-18R17|22|26-27R1|28R1G1CN4-29G1CN4-1834G1CN4|340R3	261107000	170700000	90407000	80293000	33
1012	1012T1	Unknown	'982000191009560	Matched	Clade_B	Clade_B-10	DFT1_2	DFT1_2	14114C>T	West Pencil Pine	-41.717464999999997	145.85587000000001	2014	01/11/2014	DFT1	Tissue	No	Yes	Yes	Unknown				Singleton		0.23200000000000001	0.26200000000000001	0.34399999999999997	0.247	Yes	Yes	M	1	No data (confirmed)			21	9	12	1R1_2R1_3R1_4R1_5_6_7_8_9_10R1_11_12_13_15_19_20R1_21R1_25_227_228_946	7	1	6	1R1-7-8|2R1-3R1-5-6-9-10R1-11-15-19|4R1-12-13|20R1|21R1|25|227-228-946	234200000	159900000	74300000	85600000	21
1013	1013T1	Unknown	'982009104909961	Matched	Clade_B	Clade_B-10	DFT1_2	DFT1_2A	4329G>A;14114C>T	West Pencil Pine	-41.717464999999997	145.85587000000001	2013	01/11/2013	DFT1	Tissue	No	Yes	Yes	Unknown				Singleton		0.72299999999999998	0.67500000000000004	0.84299999999999997	0.69899999999999995	Yes	Yes	F	2	No data (confirmed)			19	10	9	1R1_2R1_3R1_4R1_5_6_7_8_9_10R1_11_12_13_15_19_20R1_21R1_25_128	7	2	5	1R1-7-8|2R1-3R1-5-6-9-10R1-11-15-19|4R1-12-13|20R1|21R1|25|128	226000000	160900000	65100000	95800000	19
1014	1014T1	Unknown	'982009106154889	Matched	Clade_A2	Clade_A2-11	DFT1_0	DFT1_0	Novariants	West Pencil Pine	-41.717464999999997	145.85587000000001	2012	01/12/2012	DFT1	Tissue	No	Yes	Yes	Unknown				Singleton		0.13400000000000001	0.10299999999999999	0.42599999999999999	0.11849999999999999	Yes	No	M	1	Strain 1	No data
1016	1016T2	Unknown	'982000190606471	Matched	Clade_B	Clade_B-10	DFT1_2	DFT1_2A	4329G>A;14114C>T	West Pencil Pine	-41.717464999999997	145.85587000000001	2013	01/01/2013	DFT1	Tissue	No	Yes	Yes	Unknown				Singleton		0.41799999999999998	Not Available	0.64700000000000002	0.41799999999999998	Yes	Yes	M	2	Strain 1			19	10	9	1R1_2R1_3R1_4R1_5_6_7_8_9_10R1_11_12_13_15_19_20R1_21R1_25_128	7	2	5	1R1-7-8|2R1-3R1-5-6-9-10R1-11-15-19|4R1-12-13|20R1|21R1|25|128	226000000	160900000	65100000	95800000	19
1017	1017T3	Unknown	'982000167786788	Matched	Clade_C	Clade_C-2	DFT1_0	DFT1_0	Novariants	West Pencil Pine	-41.717464999999997	145.85587000000001	2013	01/11/2013	DFT1	Tissue	No	Yes	Yes	Unknown				Multiple		0.52100000000000002	0.505	Not Available	0.51300000000000001	Yes	Yes	F	2	No data (confirmed)	M5 loss		30	16	14	1R1_2R1_3R1_4R1_5_6_6BM30_7_8_9_10R1_11_11BM30_12_13_15_16R30_17R30_18R30_19_54R2_67R1_73R2_101R1_129R1_130_580_581_816_1032R1	7	3	4	1R1-7-8|2R1-3R1-5-6-9-10R1-11-15-19|4R1-12-13|6BM30-11BM30-16R30-17R30-18R30|54R2-73R2-101R1-129R1-130|67R1-816-1032R1|580-581	323948000	233800000	90148000	143652000	28
1017	1017T4	Unknown	'982000167786788	Matched	Clade_B	Clade_B-10	DFT1_2	DFT1_2	14114C>T	West Pencil Pine	-41.717464999999997	145.85587000000001	2013	01/11/2013	DFT1	Tissue	No	Yes	Yes	Unknown				Multiple		0.61	0.52600000000000002	0.53400000000000003	0.56799999999999995	Yes	Yes	F	2	No data (confirmed)			22	9	13	1R1_2R1_3R1_4R1_5_6_7_8_9_10R1_11_12_13_15_19_20R1_21R1_25_227_228_935_946	8	1	7	1R1-7-8|2R1-3R1-5-6-9-10R1-11-15-19|4R1-12-13|20R1|21R1|25|227-228-946|935	236000000	159900000	76100000	83800000	21
1018	1018T1	Unknown	'982000167813268	Matched	Clade_A2	Clade_A2-11	DFT1_0	DFT1_0	Novariants	West Pencil Pine	-41.717464999999997	145.85587000000001	2013	01/01/2013	DFT1	Tissue	No	Yes	Yes	Unknown				Singleton		0.50600000000000001	0.48599999999999999	Not Available	0.496	Yes	Yes	M	2	Strain 1	M5 loss		33	19	14	1R1_2R1_3R1_4R1_5_5G1CN4_5G1CN5_6_6BM17_7_8_9_10R1_11_11BM17_12_13_15_16R17_17R17_18R17_19_22_26_27R1_28R1_28R1G1CN4_29_29G1CN4_31_32_1834_1834G1CN4	9	4	5	1R1-7-8|2R1-3R1-5-6-9-10R1-11-15-19|4R1-12-13|5G1CN4-28R1-29-31-32-1834|5G1CN5|6BM17-11BM17-16R17-17R17-18R17|22|26-27R1|28R1G1CN4-29G1CN4-1834G1CN4	261107000	170700000	90407000	80293000	33
1019	1019T1	Unknown	'982009106145258	Matched	Clade_B	Clade_B-10	DFT1_2	DFT1_2	14114C>T	West Pencil Pine	-41.717464999999997	145.85587000000001	2012	01/05/2012	DFT1	Tissue	No	Yes	Yes	Unknown				Singleton		0.41399999999999998	0.40200000000000002	0.71199999999999997	0.40799999999999997	Yes	Yes	F	3	Strain 2			18	9	9	1R1_2R1_3R1_4R1_5_6_7_8_9_10R1_11_12_13_15_19_20R1_21R1_25	6	1	5	1R1-7-8|2R1-3R1-5-6-9-10R1-11-15-19|4R1-12-13|20R1|21R1|25	225000000	159900000	65100000	94800000	18
1020	1020T1	Unknown	'982009106203255	Matched	Clade_C	Clade_C-3	DFT1_5	DFT1_5	2681C>T	West Pencil Pine	-41.717464999999997	145.85587000000001	2013	01/02/2013	DFT1	Tissue	No	Yes	Yes	Unknown				Singleton		0.6	0.59699999999999998	0.76600000000000001	0.59850000000000003	Yes	Yes	F	3	Strain 2			15	9	6	1R1_2R1_3R1_4R1_5_6_7_8_9_10R1_11_12_13_15_19	3	1	2	1R1-7-8|2R1-3R1-5-6-9-10R1-11-15-19|4R1-12-13	211000000	159900000	51100000	108800000	15
1021	1021T1	Unknown	'982000167782584	Matched	Clade_B	Clade_B-10	DFT1_2	DFT1_2B1	14114C>T;12362G>A;14412G>A	West Pencil Pine	-41.717464999999997	145.85587000000001	2014	01/01/2014	DFT1	Tissue	No	Yes	Yes	Unknown				Singleton		0.14699999999999999	0.14699999999999999	0.44600000000000001	0.14699999999999999	Yes	No	F	2	No data (confirmed)	No data
1022	1022T1	Unknown	'982000167811000	Matched	Clade_B	Clade_B-10	DFT1_2	DFT1_2	14114C>T	West Pencil Pine	-41.717464999999997	145.85587000000001	2013	01/05/2013	DFT1	Tissue	No	Yes	Yes	Unknown				Multiple		0.60899999999999999	0.59899999999999998	0.74	0.60399999999999998	Yes	Yes	F	2	Strain 2			18	9	9	1R1_2R1_3R1_4R1_5_6_7_8_9_10R1_11_12_13_15_19_20R1_21R1_25	6	1	5	1R1-7-8|2R1-3R1-5-6-9-10R1-11-15-19|4R1-12-13|20R1|21R1|25	225000000	159900000	65100000	94800000	18
1022	1022T2	Unknown	'982000167811000	Matched	Clade_B	Clade_B-10	DFT1_2	DFT1_2	14114C>T	West Pencil Pine	-41.717464999999997	145.85587000000001	2013	01/05/2013	DFT1	Tissue	No	Yes	Yes	Unknown				Multiple		0.27200000000000002	0.25	0.59399999999999997	0.26100000000000001	Yes	Yes	F	2	Strain 2			18	9	9	1R1_2R1_3R1_4R1_5_6_7_8_9_10R1_11_12_13_15_19_20R1_21R1_25	6	1	5	1R1-7-8|2R1-3R1-5-6-9-10R1-11-15-19|4R1-12-13|20R1|21R1|25	225000000	159900000	65100000	94800000	18
1023	1023T1	Unknown	'982009106181561	Matched	Clade_A2	Clade_A2-11	DFT1_0	DFT1_0	Novariants	West Pencil Pine	-41.717464999999997	145.85587000000001	2012	01/02/2012	DFT1	Tissue	No	Yes	Yes	Unknown				Multiple		0.38200000000000001	0.40400000000000003	0.66800000000000004	0.39300000000000002	Yes	Yes	M	3	Strain 1 tetraploid	M5 loss		33	19	14	1R1_2R1_3R1_4R1_5_5G1CN4_5G1CN5_6_6BM17_7_8_9_10R1_11_11BM17_12_13_15_16R17_17R17_18R17_19_22_26_27R1_28R1_28R1G1CN4_29_29G1CN4_31_32_1834_1834G1CN4	9	4	5	1R1-7-8|2R1-3R1-5-6-9-10R1-11-15-19|4R1-12-13|5G1CN4-28R1-29-31-32-1834|5G1CN5|6BM17-11BM17-16R17-17R17-18R17|22|26-27R1|28R1G1CN4-29G1CN4-1834G1CN4	261107000	170700000	90407000	80293000	33
1023	1023T2	Unknown	'982009106181561	Matched	Clade_A2	Clade_A2-11	DFT1_0	DFT1_0	Novariants	West Pencil Pine	-41.717464999999997	145.85587000000001	2012	01/02/2012	DFT1	Tissue	No	Yes	Yes	Unknown				Multiple		0.128	0.107	0.30099999999999999	0.11749999999999999	Yes	No	M	3	Tetraploid Strain 1	No data
1024	1024T1	Unknown	'982009104275775	Matched	Clade_A2	Clade_A2-11	DFT1_0	DFT1_0	Novariants	West Pencil Pine	-41.717464999999997	145.85587000000001	2012	01/02/2012	DFT1	Tissue	No	Yes	Yes	Unknown				Singleton		0.45800000000000002	0.42799999999999999	0.77200000000000002	0.443	Yes	Yes	F	3	Strain 1	M5 loss		32	18	14	1R1_2R1_3R1_4R1_5_5G1CN4_6_6BM17_7_8_9_10R1_11_11BM17_12_13_15_16R17_17R17_18R17_19_22_26_27R1_28R1_28R1G1CN4_29_29G1CN4_31_32_1834_1834G1CN4	8	3	5	1R1-7-8|2R1-3R1-5-6-9-10R1-11-15-19|4R1-12-13|5G1CN4-28R1-29-31-32-1834|6BM17-11BM17-16R17-17R17-18R17|22|26-27R1|28R1G1CN4-29G1CN4-1834G1CN4	260207000	169800000	90407000	79393000	32
1025	1025T2	Unknown	'982009105854600	Matched	Clade_A2	Clade_A2-10	DFT1_22	DFT1_22	16143G>A	West Pencil Pine	-41.717464999999997	145.85587000000001	2012	01/09/2012	DFT1	Tissue	No	Yes	Yes	Unknown				Singleton		0.436	0.41499999999999998	0.77200000000000002	0.42549999999999999	Yes	Yes	M	2	Strain 2	M5 loss		35	20	15	1R1_2R1_3R1_4R1_5_6_6BM17_7_8_9_10R1_10R1G1CN4_10R1G1CN5_11_11BM17_12_13_15_15G1CN4_15G1CN5_16R17_17R17_18R17_19_22_26_27R1_93G1CN4_93G1CN5_93G1CN6_93G1CN7_102G1CN4_102G1CN5_340R2_1827	12	6	6	1R1-7-8|2R1-3R1-5-6-9-10R1-11-15-19|4R1-12-13|6BM17-11BM17-16R17-17R17-18R17|10R1G1CN4-15G1CN4-93G1CN4-93G1CN5-102G1CN4|10R1G1CN5-15G1CN5-102G1CN5|22|26-27R1|93G1CN6|93G1CN7|340R2|1827	269007000	176400000	92607000	83793000	35
1026	1026T1	Unknown	'982000190532654	Matched	Clade_C	Clade_C-3	DFT1_5	DFT1_5	2681C>T	West Pencil Pine	-41.717464999999997	145.85587000000001	2013	01/02/2013	DFT1	Tissue	No	Yes	Yes	Unknown				Singleton		0.47499999999999998	0.47699999999999998	0.78600000000000003	0.47599999999999998	Yes	Yes	F	3	Strain 1	M5 loss		21	9	12	1R1_2R1_3R1_4R1_5_6_6BM33_7_8_9_10R1_11_11BM33_12_13_15_16R33_17R33_18R33_19_175R2	5	1	4	1R1-7-8|2R1-3R1-5-6-9-10R1-11-15-19|4R1-12-13|6BM33-11BM33-16R33-17R33-18R33|175R2	220007000	159900000	60107000	99793000	21
1027	1027T1	Unknown	'982009106180793	Matched	Clade_A2	Clade_A2-11	DFT1_0	DFT1_0	Novariants	West Pencil Pine	-41.717464999999997	145.85587000000001	2012	01/10/2012	DFT1	Tissue	No	Yes	Yes	Unknown				Multiple		0.68600000000000005	0.69099999999999995	Not Available	0.6885	Yes	Yes	M	2	Strain 2	M5 loss		33	19	14	1R1_2R1_3R1_4R1_5_5G1CN4_5G1CN5_6_6BM17_7_8_9_10R1_11_11BM17_12_13_15_16R17_17R17_18R17_19_22_26_27R1_28R1_28R1G1CN4_29_29G1CN4_31_32_1834_1834G1CN4	9	4	5	1R1-7-8|2R1-3R1-5-6-9-10R1-11-15-19|4R1-12-13|5G1CN4-28R1-29-31-32-1834|5G1CN5|6BM17-11BM17-16R17-17R17-18R17|22|26-27R1|28R1G1CN4-29G1CN4-1834G1CN4	261107000	170700000	90407000	80293000	33
1027	1027T2	Unknown	'982009106180793	Matched	Clade_B	Clade_B-10	DFT1_2	DFT1_2	14114C>T	West Pencil Pine	-41.717464999999997	145.85587000000001	2012	01/10/2012	DFT1	Tissue	No	Yes	Yes	Unknown				Multiple		0.77100000000000002	0.77600000000000002	0.86599999999999999	0.77349999999999997	Yes	Yes	M	2	Strain 2			18	9	9	1R1_2R1_3R1_4R1_5_6_7_8_9_10R1_11_12_13_15_19_20R1_21R1_25	6	1	5	1R1-7-8|2R1-3R1-5-6-9-10R1-11-15-19|4R1-12-13|20R1|21R1|25	225000000	159900000	65100000	94800000	18
1027	1027T3	Unknown	'982009106180793	Matched	Clade_A2	Clade_A2-11	DFT1_0	DFT1_0	Novariants	West Pencil Pine	-41.717464999999997	145.85587000000001	2012	01/10/2012	DFT1	Tissue	No	Yes	Yes	Unknown				Multiple		0.58299999999999996	0.57099999999999995	0.752	0.57699999999999996	Yes	Yes	M	2	Strain 2	M5 loss		33	19	14	1R1_2R1_3R1_4R1_5_5G1CN4_5G1CN5_6_6BM17_7_8_9_10R1_11_11BM17_12_13_15_16R17_17R17_18R17_19_22_26_27R1_28R1_28R1G1CN4_29_29G1CN4_31_32_1834_1834G1CN4	9	4	5	1R1-7-8|2R1-3R1-5-6-9-10R1-11-15-19|4R1-12-13|5G1CN4-28R1-29-31-32-1834|5G1CN5|6BM17-11BM17-16R17-17R17-18R17|22|26-27R1|28R1G1CN4-29G1CN4-1834G1CN4	261107000	170700000	90407000	80293000	33
1028	1028T1	Unknown	'982000190604602	Matched	Clade_A2	Clade_A2-11	DFT1_0	DFT1_0	Novariants	West Pencil Pine	-41.717464999999997	145.85587000000001	2013	01/11/2013	DFT1	Tissue	No	Yes	Yes	Unknown				Singleton		0.82699999999999996	0.85199999999999998	Not Available	0.83950000000000002	Yes	Yes	M	1	No data (confirmed)	M5 loss		33	19	14	1R1_2R1_3R1_4R1_5_5G1CN4_5G1CN5_6_6BM17_7_8_9_10R1_11_11BM17_12_13_15_16R17_17R17_18R17_19_22_26_27R1_28R1_28R1G1CN4_29_29G1CN4_31_32_1834_1834G1CN4	9	4	5	1R1-7-8|2R1-3R1-5-6-9-10R1-11-15-19|4R1-12-13|5G1CN4-28R1-29-31-32-1834|5G1CN5|6BM17-11BM17-16R17-17R17-18R17|22|26-27R1|28R1G1CN4-29G1CN4-1834G1CN4	261107000	170700000	90407000	80293000	33
1030	1030T1	Unknown	'982009104919599	Matched	Clade_C	Clade_C-2	DFT1_0	DFT1_0	Novariants	West Pencil Pine	-41.717464999999997	145.85587000000001	2013	01/02/2013	DFT1	Tissue	No	Yes	Yes	Unknown				Multiple		0.437	0.42599999999999999	0.64	0.43149999999999999	Yes	Yes	F	2	Strain 1	M5 loss		30	15	15	1R1_2R1_3R1_4R1_5_6_6BM30_7_8_9_10R1_11_11BM30_12_13_15_16R30_17R30_18R30_19_54R2_67R1_73R2_101R1_129R1_130_340R1_816_947_1032R1	8	3	5	1R1-7-8|2R1-3R1-5-6-9-10R1-11-15-19|4R1-12-13|6BM30-11BM30-16R30-17R30-18R30|54R2-73R2-101R1-129R1-130|67R1-816-1032R1|340R1|947	266148000	175300000	90848000	84452000	30
1030	1030T3	Unknown	'982009104919599	Matched	Clade_A2	Clade_A2-11	DFT1_0	DFT1_0	Novariants	West Pencil Pine	-41.717464999999997	145.85587000000001	2013	01/02/2013	DFT1	Tissue	No	Yes	Yes	Unknown				Multiple		0.75800000000000001	0.76300000000000001	Not Available	0.76049999999999995	Yes	Yes	F	2	Strain 1	M5 loss		33	19	14	1R1_2R1_3R1_4R1_5_5G1CN4_5G1CN5_6_6BM17_7_8_9_10R1_11_11BM17_12_13_15_16R17_17R17_18R17_19_22_26_27R1_28R1_28R1G1CN4_29_29G1CN4_31_32_1834_1834G1CN4	9	4	5	1R1-7-8|2R1-3R1-5-6-9-10R1-11-15-19|4R1-12-13|5G1CN4-28R1-29-31-32-1834|5G1CN5|6BM17-11BM17-16R17-17R17-18R17|22|26-27R1|28R1G1CN4-29G1CN4-1834G1CN4	261107000	170700000	90407000	80293000	33
1031	1031T2	Unknown	'982009104909578	Matched	Clade_B	Clade_B-10	DFT1_2	DFT1_2	14114C>T	West Pencil Pine	-41.717464999999997	145.85587000000001	2012	01/11/2012	DFT1	Tissue	No	Yes	Yes	Unknown				Singleton		0.38400000000000001	0.373	0.73299999999999998	0.3785	Yes	Yes	F	1	No data (confirmed)			18	9	9	1R1_2R1_3R1_4R1_5_6_7_8_9_10R1_11_12_13_15_19_20R1_21R1_25	6	1	5	1R1-7-8|2R1-3R1-5-6-9-10R1-11-15-19|4R1-12-13|20R1|21R1|25	225000000	159900000	65100000	94800000	18
1032	1032T1	Unknown	'982000362816049	Matched	Clade_B	Clade_B-10	DFT1_2	DFT1_2	14114C>T	West Pencil Pine	-41.717464999999997	145.85587000000001	2015	01/08/2015	DFT1	Tissue	No	Yes	Yes	Unknown				Multiple		0.53300000000000003	0.49099999999999999	0.77300000000000002	0.51200000000000001	Yes	Yes	F	1	No data (confirmed)			23	14	9	1R1_2R1_3R1_4R1_5_6_7_8_9_10R1_11_12_13_15_19_20R1_21R1_25_180_180G1CN4_181_181G1CN4_182	7	2	5	1R1-7-8|2R1-3R1-5-6-9-10R1-11-15-19|4R1-12-13|20R1|21R1|25|180-180G1CN4-181-181G1CN4-182	230000000	164900000	65100000	99800000	23
1032	1032T2	Unknown	'982000362816049	Matched	Clade_B	Clade_B-10	DFT1_2	DFT1_2	14114C>T	West Pencil Pine	-41.717464999999997	145.85587000000001	2015	01/08/2015	DFT1	Tissue	No	Yes	Yes	Unknown				Multiple		0.71399999999999997	0.69	0.81	0.70199999999999996	Yes	Yes	F	1	No data (confirmed)			18	9	9	1R1_2R1_3R1_4R1_5_6_7_8_9_10R1_11_12_13_15_19_20R1_21R1_25	6	1	5	1R1-7-8|2R1-3R1-5-6-9-10R1-11-15-19|4R1-12-13|20R1|21R1|25	225000000	159900000	65100000	94800000	18
1033	1033T1	Unknown	'982000190532991	Matched	Clade_B	Clade_B-10	DFT1_2	DFT1_2B1	14114C>T;12362G>A;14412G>A	West Pencil Pine	-41.717464999999997	145.85587000000001	2013	01/08/2013	DFT1	Tissue	No	Yes	Yes	Unknown				Singleton		0.41499999999999998	0.37	0.76300000000000001	0.39250000000000002	Yes	Yes	M	2	Strain 2			18	9	9	1R1_2R1_3R1_4R1_5_6_7_8_9_10R1_11_12_13_15_19_20R1_21R1_25	6	1	5	1R1-7-8|2R1-3R1-5-6-9-10R1-11-15-19|4R1-12-13|20R1|21R1|25	225000000	159900000	65100000	94800000	18
1034	1034T1	Unknown	'982000190610576	Matched	Clade_B	Clade_B-10	DFT1_2	DFT1_2	14114C>T	West Pencil Pine	-41.717464999999997	145.85587000000001	2013	01/11/2013	DFT1	Tissue	No	Yes	Yes	Unknown				Singleton		0.28699999999999998	0.26600000000000001	0.42099999999999999	0.27650000000000002	Yes	Yes	M	2	No data (confirmed)			18	9	9	1R1_2R1_3R1_4R1_5_6_7_8_9_10R1_11_12_13_15_19_20R1_21R1_25	6	1	5	1R1-7-8|2R1-3R1-5-6-9-10R1-11-15-19|4R1-12-13|20R1|21R1|25	225000000	159900000	65100000	94800000	18
1036	1036T1	Unknown	'982000190605291	Matched	Clade_A2	Clade_A2-11	DFT1_0	DFT1_0	Novariants	West Pencil Pine	-41.717464999999997	145.85587000000001	2013	01/11/2013	DFT1	Tissue	No	Yes	Yes	Unknown				Singleton		0.71899999999999997	0.70599999999999996	Not Available	0.71250000000000002	Yes	Yes	F	1	No data (confirmed)	M5 loss		33	19	14	1R1_2R1_3R1_4R1_5_5G1CN4_5G1CN5_6_6BM17_7_8_9_10R1_11_11BM17_12_13_15_16R17_17R17_18R17_19_22_26_27R1_28R1_28R1G1CN4_29_29G1CN4_31_32_1834_1834G1CN4	9	4	5	1R1-7-8|2R1-3R1-5-6-9-10R1-11-15-19|4R1-12-13|5G1CN4-28R1-29-31-32-1834|5G1CN5|6BM17-11BM17-16R17-17R17-18R17|22|26-27R1|28R1G1CN4-29G1CN4-1834G1CN4	261107000	170700000	90407000	80293000	33
1037	1037T1	Unknown	'982000167786887	Matched	Clade_A2	Clade_A2-11	DFT1_0	DFT1_0	Novariants	West Pencil Pine	-41.717464999999997	145.85587000000001	2014	01/02/2014	DFT1	Tissue	No	Yes	Yes	Unknown				Singleton		0.372	0.36399999999999999	0.66700000000000004	0.36799999999999999	Yes	Yes	F	3	No data (confirmed)	M5 loss		32	18	14	1R1_2R1_3R1_4R1_5_5G1CN4_6_6BM17_7_8_9_10R1_11_11BM17_12_13_15_16R17_17R17_18R17_19_22_26_27R1_28R1_28R1G1CN4_29_29G1CN4_31_32_1834_1834G1CN4	8	3	5	1R1-7-8|2R1-3R1-5-6-9-10R1-11-15-19|4R1-12-13|5G1CN4-28R1-29-31-32-1834|6BM17-11BM17-16R17-17R17-18R17|22|26-27R1|28R1G1CN4-29G1CN4-1834G1CN4	260207000	169800000	90407000	79393000	32
1038	1038T1	Unknown	'982000190609040	Matched	Clade_B	Clade_B-10	DFT1_2	DFT1_2	14114C>T	West Pencil Pine	-41.717464999999997	145.85587000000001	2013	01/11/2013	DFT1	Tissue	No	Yes	Yes	Unknown				Multiple		0.46899999999999997	0.48099999999999998	0.77800000000000002	0.47499999999999998	Yes	Yes	F	1	No data (confirmed)			18	9	9	1R1_2R1_3R1_4R1_5_6_7_8_9_10R1_11_12_13_15_19_20R1_21R1_25	6	1	5	1R1-7-8|2R1-3R1-5-6-9-10R1-11-15-19|4R1-12-13|20R1|21R1|25	225000000	159900000	65100000	94800000	18
1038	1038T2	Unknown	'982000190609040	Matched	Clade_A2	Clade_A2-11	DFT1_0	DFT1_0	Novariants	West Pencil Pine	-41.717464999999997	145.85587000000001	2013	01/11/2013	DFT1	Tissue	No	Yes	Yes	Unknown				Multiple		0.57299999999999995	0.58099999999999996	Not Available	0.57699999999999996	Yes	Yes	F	1	No data (confirmed)	M5 loss		33	19	14	1R1_2R1_3R1_4R1_5_5G1CN4_5G1CN5_6_6BM17_7_8_9_10R1_11_11BM17_12_13_15_16R17_17R17_18R17_19_22_26_27R1_28R1_28R1G1CN4_29_29G1CN4_31_32_1834_1834G1CN4	9	4	5	1R1-7-8|2R1-3R1-5-6-9-10R1-11-15-19|4R1-12-13|5G1CN4-28R1-29-31-32-1834|5G1CN5|6BM17-11BM17-16R17-17R17-18R17|22|26-27R1|28R1G1CN4-29G1CN4-1834G1CN4	261107000	170700000	90407000	80293000	33
1039	1039T1	Unknown	'982000356425037	Matched	Clade_B	Clade_B-10	DFT1_2	DFT1_2	14114C>T	West Pencil Pine	-41.717464999999997	145.85587000000001	2015	01/08/2015	DFT1	Tissue	No	Yes	Yes	Unknown				Singleton		0.39800000000000002	0.39	0.70799999999999996	0.39400000000000002	Yes	Yes	F	2	No data (confirmed)			23	14	9	1R1_2R1_3R1_4R1_5_6_7_8_9_10R1_11_12_13_15_19_20R1_21R1_25_180_180G1CN4_181_181G1CN4_182	7	2	5	1R1-7-8|2R1-3R1-5-6-9-10R1-11-15-19|4R1-12-13|20R1|21R1|25|180-180G1CN4-181-181G1CN4-182	230000000	164900000	65100000	99800000	23
1041	1041T1	Unknown	'982000167813159	Matched	Clade_A2	Clade_A2-11	DFT1_0	DFT1_0	Novariants	West Pencil Pine	-41.717464999999997	145.85587000000001	2012	01/11/2012	DFT1	Tissue	No	Yes	Yes	Unknown				Singleton		0.29799999999999999	0.27500000000000002	0.68100000000000005	0.28649999999999998	Yes	Yes	F	1	Strain 1 50% Tetraploid	M5 loss		32	18	14	1R1_2R1_3R1_4R1_5_5G1CN4_6_6BM17_7_8_9_10R1_11_11BM17_12_13_15_16R17_17R17_18R17_19_22_26_27R1_28R1_28R1G1CN4_29_29G1CN4_31_32_1834_1834G1CN4	8	3	5	1R1-7-8|2R1-3R1-5-6-9-10R1-11-15-19|4R1-12-13|5G1CN4-28R1-29-31-32-1834|6BM17-11BM17-16R17-17R17-18R17|22|26-27R1|28R1G1CN4-29G1CN4-1834G1CN4	260207000	169800000	90407000	79393000	32
1042	1042T1	Unknown	'982000190609271	Matched	Clade_A2	Clade_A2-11	DFT1_0	DFT1_0	Novariants	West Pencil Pine	-41.717464999999997	145.85587000000001	2013	01/11/2013	DFT1	Tissue	No	Yes	Yes	Unknown				Singleton		0.54300000000000004	0.57999999999999996	Not Available	0.5615	Yes	Yes	M	3	No data (confirmed)	M5 loss		33	19	14	1R1_2R1_3R1_4R1_5_5G1CN4_5G1CN5_6_6BM17_7_8_9_10R1_11_11BM17_12_13_15_16R17_17R17_18R17_19_22_26_27R1_28R1_28R1G1CN4_29_29G1CN4_31_32_1834_1834G1CN4	9	4	5	1R1-7-8|2R1-3R1-5-6-9-10R1-11-15-19|4R1-12-13|5G1CN4-28R1-29-31-32-1834|5G1CN5|6BM17-11BM17-16R17-17R17-18R17|22|26-27R1|28R1G1CN4-29G1CN4-1834G1CN4	261107000	170700000	90407000	80293000	33
1043	1043T1	Unknown	Unknown	Matched	Clade_A1	Clade_A1-3A1	Unknown	Unknown	Unknown	Margate	-43.034731999999998	147.272053	2017	03/01/2017	DFT1	Tissue	No	Yes	Yes	Unknown				Multiple		Not Available	0.56200000000000006	Not Available	0.56200000000000006	Yes	No	F	2	No data	No data
1043	1043T2	Unknown	Unknown	Matched	Clade_A1	Clade_A1-3A1	Unknown	Unknown	Unknown	Margate	-43.034731999999998	147.272053	2017	03/01/2017	DFT1	Tissue	No	Yes	Yes	Unknown				Multiple		Not Available	0.95799999999999996	Not Available	0.95799999999999996	Yes	No	F	2	No data	No data
1044	1044T1	Unknown	Unknown	Matched	Clade_A2	Clade_A2-6	DFT1_6	DFT1_6	3161G>A	Southport	-43.420797999999998	146.97326100000001	2017	23/04/2017	DFT1	Tissue	No	Yes	Yes	Unknown				Multiple		0.874	Not Available	0.94899999999999995	0.874	Yes	Yes	M	2	No data			18	9	9	1R1_2R1_3R1_4R1_5_6_7_8_9_10R1_11_12_13_15_19_22_26_27R1	5	1	4	1R1-7-8|2R1-3R1-5-6-9-10R1-11-15-19|4R1-12-13|22|26-27R1	242100000	159900000	82200000	77700000	18
1044	1044T2	Unknown	Unknown	Matched	Clade_A2	Clade_A2-6	Unknown	Unknown	Unknown	Southport	-43.420797999999998	146.97326100000001	2017	23/04/2017	DFT1	Tissue	No	Yes	Yes	Unknown				Multiple		Not Available	0.44900000000000001	Not Available	0.44900000000000001	Yes	No	M	2	No data	No data
1044	1044T3	Unknown	Unknown	Matched	Clade_A2	Clade_A2-6	Unknown	Unknown	Unknown	Southport	-43.420797999999998	146.97326100000001	2017	23/04/2017	DFT1	Tissue	No	Yes	No (metastasis with matched primary)	Lung		Metastasis		Multiple		Not Available	0.71099999999999997	Not Available	0.71099999999999997	Yes	No	M	2	No data	No data
1044	1044T4	Unknown	Unknown	Matched	Clade_A2	Clade_A2-6	DFT1_6	DFT1_6	3161G>A	Southport	-43.420797999999998	146.97326100000001	2017	23/04/2017	DFT1	Tissue	No	Yes	Yes	Unknown				Multiple		0.85799999999999998	0.83499999999999996	0.85399999999999998	0.84650000000000003	Yes	Yes	M	2	No data			22	13	9	1R1_2R1_3R1_4R1_5_6_7_8_9_10R1_11_12_13_15_15G2CN4_19_22_26_27R1_313G1CN4_316G1CN4_1855	7	3	4	1R1-7-8|2R1-3R1-5-6-9-10R1-11-15-19|4R1-12-13|15G2CN4-313G1CN4-316G1CN4|22|26-27R1|1855	300900000	218700000	82200000	136500000	18
1045	1045T1	Unknown	Unknown	Matched	Clade_C	Clade_C-3	DFT1_5	DFT1_5	2681C>T	Granville Harbour	-41.805917999999998	145.04102599999999	2017	26/05/2017	DFT1	Tissue	No	Yes	Yes	Unknown				Multiple		0.997	Not Available	0.86699999999999999	0.997	Yes	Yes	M	3	No data	M5 loss	Tetraploid (9)	29	12	17	1R1_2R1_3R1_4R1_5_6_6BM34_7_8_9_10R1_11_11BM34_12_13_15_16R34_17R34_18R34_19_52R2_53R1_61R1_62_68_97_104_345R1_823	8	3	5	1R1-7-8|2R1-3R1-5-6-9-10R1-11-15-19|4R1-12-13|6BM34-11BM34-16R34-17R34-18R34|52R2-53R1-61R1-68-823|62|97-104|345R1	852107000	784800000	67307000	717493000
1045	1045T2	Unknown	Unknown	Matched	Clade_C	Clade_C-3	DFT1_5	DFT1_5	2681C>T	Granville Harbour	-41.805917999999998	145.04102599999999	2017	26/05/2017	DFT1	Tissue	No	Yes	Yes	Unknown				Multiple		0.77500000000000002	0.69399999999999995	0.83499999999999996	0.73450000000000004	Yes	Yes	M	3	No data	M5 loss	Tetraploid (9)	32	12	20	1R1_2R1_3R1_4R1_5_6_6BM34_7_8_9_10R1_11_11BM34_12_13_15_16R34_17R34_18R34_19_52R2_53R1_61R1_62_68_97_104_345R1_823_1856_1857_1858	9	3	6	1R1-7-8|2R1-3R1-5-6-9-10R1-11-15-19|4R1-12-13|6BM34-11BM34-16R34-17R34-18R34|52R2-53R1-61R1-68-823|62|97-104|345R1|1856-1857-1858	892830537	784800000	108030537	676769463
1045	1045T3	Unknown	Unknown	Matched	Clade_C	Clade_C-3	DFT1_5	DFT1_5	2681C>T	Granville Harbour	-41.805917999999998	145.04102599999999	2017	26/05/2017	DFT1	Tissue	No	Yes	Yes	Unknown				Multiple		0.90800000000000003	0.93100000000000005	0.85799999999999998	0.91949999999999998	Yes	Yes	M	3	No data	M5 loss	Tetraploid (9)	29	12	17	1R1_2R1_3R1_4R1_5_6_6BM34_7_8_9_10R1_11_11BM34_12_13_15_16R34_17R34_18R34_19_52R2_53R1_61R1_62_68_97_104_345R1_823	8	3	5	1R1-7-8|2R1-3R1-5-6-9-10R1-11-15-19|4R1-12-13|6BM34-11BM34-16R34-17R34-18R34|52R2-53R1-61R1-68-823|62|97-104|345R1	852107000	784800000	67307000	717493000
1045	1045T4	Unknown	Unknown	Matched	Clade_C	Clade_C-3	DFT1_5	DFT1_5E	2681C>T; 13917A>G	Granville Harbour	-41.805917999999998	145.04102599999999	2017	26/05/2017	DFT1	Tissue	No	Yes	Yes	Unknown				Multiple		0.96799999999999997	Not Available	0.59599999999999997	0.96799999999999997	Yes	Yes	M	3	No data	M5 loss	Tetraploid (9)	29	12	17	1R1_2R1_3R1_4R1_5_6_6BM34_7_8_9_10R1_11_11BM34_12_13_15_16R34_17R34_18R34_19_52R2_53R1_61R1_62_68_97_104_345R1_823	8	3	5	1R1-7-8|2R1-3R1-5-6-9-10R1-11-15-19|4R1-12-13|6BM34-11BM34-16R34-17R34-18R34|52R2-53R1-61R1-68-823|62|97-104|345R1	852107000	784800000	67307000	717493000
1046	1046T1	Unknown	'982000363413078	Matched	Clade_A2	Clade_A2-5	DFT1_25	DFT1_25	15059A>G	Stony Head	-41.014394000000003	147.013229	2017	02/07/2017	DFT1	Tissue	No	Yes	Yes	Neck	Neck ventral to head			Singleton		0.34200000000000003	0.35499999999999998	Not Available	0.34849999999999998	Yes	Yes	M	2	No data	M5 loss	Tetraploid (4)	32	17	15	1R1_2R1_3R1_4R1_5_6_6BM13_7_8_9_10R1_11_11BM13_12_13_15_16R13_17R13_18R13_19_22_26_27R1_40R1_40R1G1CN4_43R1_43R1G1CN4_49R1_49R1G1CN4_60_169_217	9	4	5	1R1-7-8|2R1-3R1-5-6-9-10R1-11-15-19|4R1-12-13|6BM13-11BM13-16R13-17R13-18R13-60|22|26-27R1|40R1-43R1-49R1|40R1G1CN4-43R1G1CN4-49R1G1CN4|169-217	355791145	263984145	91807000	172177145
1047	1047T1	Unknown	Unknown	Matched	Clade_A2	Clade_A2-5	DFT1_0	DFT1_0	Novariants	Stony Head	-41.014394000000003	147.013229	2017	30/06/2017	DFT1	Tissue	No	Yes	Yes	Facial/oral	Exterior lower right lip			Multiple		0.14599999999999999	0.14199999999999999	0.45400000000000001	0.14399999999999999	Yes	No	M	Unknown	No data	No data	Tetraploid (4)
1047	1047T1.1	Unknown	Unknown	Matched	Clade_A2	Clade_A2-5	DFT1_32	DFT1_32	6881T>C	Stony Head	-41.014394000000003	147.013229	2017	25/09/2017	DFT1	Tissue	No	Yes	Yes	Facial/oral	Exterior lower right lip			Multiple	Time-course	0.27600000000000002	0.28699999999999998	0.222	0.28149999999999997	Yes	Yes	M	Unknown	No data	M5 loss	Tetraploid (4)	32	17	15	1R1_2R1_3R1_4R1_5_6_6BM13_7_8_9_10R1_11_11BM13_12_13_15_16R13_17R13_18R13_19_22_26_27R1_40R1_40R1G1CN4_43R1_43R1G1CN4_49R1_49R1G1CN4_60_169_217	9	4	5	1R1-7-8|2R1-3R1-5-6-9-10R1-11-15-19|4R1-12-13|6BM13-11BM13-16R13-17R13-18R13-60|22|26-27R1|40R1-43R1-49R1|40R1G1CN4-43R1G1CN4-49R1G1CN4|169-217	355791145	263984145	91807000	172177145
1048	1048T1	Unknown	Unknown	Matched	Clade_A2	Clade_A2-5	DFT1_0	DFT1_0	Novariants	Stony Head	-41.014394000000003	147.013229	2017	30/06/2017	DFT1	Tissue	No	Yes	Yes	Facial/oral	Front interior lip			Singleton		0.41899999999999998	0.43	0.74	0.42449999999999999	Yes	Yes	F	5	Strain 1 tetraploid	M5 loss	Tetraploid (4)	28	12	16	1R1_2R1_3R1_4R1_5_6_6BM13_7_8_9_10R1_11_11BM13_12_13_15_16R13_17R13_18R13_19_22_26_27R1_40R1_43R1_49R1_60_110	8	2	6	1R1-7-8|2R1-3R1-5-6-9-10R1-11-15-19|4R1-12-13|6BM13-11BM13-16R13-17R13-18R13-60|22|26-27R1|40R1-43R1-49R1|110	258848000	161841000	97007000	64834000
1049	1049T1	Unknown	'982000405949540	Unmatched	Clade_B	Clade_B-7	DFT1_2	DFT1_2F	14114C>T;14727G>A	Kempton	-42.525894000000001	147.20354900000001	2017	15/05/2017	DFT1	Tissue	No	Yes	Yes	Facial/oral	Left side top of nose			Multiple		0.10199999999999999	0.106	0.52100000000000002	0.104	Yes	No	F	2	No data (confirmed)	No data
1049	1049T2	Unknown	'982000405949540	Unmatched	Clade_B	Clade_B-7	DFT1_2	DFT1_2F	14114C>T;14727G>A	Kempton	-42.525894000000001	147.20354900000001	2017	15/05/2017	DFT1	Tissue	No	Yes	Yes	Facial/oral	Right side of nose			Multiple		0.36399999999999999	0.314	0.77300000000000002	0.33900000000000002	Yes	Yes	F	2	No data			20	9	11	1R1_2R1_3R1_3R1BM35_3R1BM41_4R1_5_6_7_8_9_10R1_11_12_13_15_19_20R1_21R1_25	7	1	6	1R1-7-8|2R1-3R1-5-6-9-10R1-11-15-19|3R1BM35-3R1BM41|4R1-12-13|20R1|21R1|25	231200000	159900000	71300000	88600000	20
1050	1050T1	Unknown	'982000363452754	Matched	Clade_B	Clade_B-7	DFT1_2	DFT1_2F	14114C>T;14727G>A	Kempton	-42.525894000000001	147.20354900000001	2017	13/05/2017	DFT1	Tissue	No	Yes	Yes	Facial/oral	Right lower jaw			Multiple		0.77300000000000002	0.73199999999999998	0.873	0.75249999999999995	Yes	Yes	M	2	No data			20	10	10	1R1_2R1_3R1_4R1_5_6_7_8_9_10R1_11_12_13_15_19_20R1_21R1_25_226_286R2	8	2	6	1R1-7-8|2R1-3R1-5-6-9-10R1-11-15-19|4R1-12-13|20R1|21R1|25|226|286R2	228000000	160900000	67100000	93800000	19
1050	1050T2	Unknown	'982000363452754	Matched	Clade_B	Clade_B-7	DFT1_2	DFT1_2F	14114C>T;14727G>A	Kempton	-42.525894000000001	147.20354900000001	2017	13/05/2017	DFT1	Tissue	No	Yes	Yes	Neck	Right side of neck ventral to head			Multiple		0.29299999999999998	0.30299999999999999	0.504	0.29799999999999999	No	Yes	M	2	No data			21	11	10	1R1_2R1_3R1_4R1_5_6_7_8_9_10R1_11_12_13_15_19_20R1_21R1_25_226_286R2_286R2G1CN3.5	9	3	6	1R1-7-8|2R1-3R1-5-6-9-10R1-11-15-19|4R1-12-13|20R1|21R1|25|226|286R2|286R2G1CN3.5	229000000	161900000	67100000	94800000	19
1050	1050T3	Unknown	'982000363452754	Matched	Clade_B	Clade_B-7	DFT1_2	DFT1_2F	14114C>T;14727G>A	Kempton	-42.525894000000001	147.20354900000001	2017	13/05/2017	DFT1	Tissue	No	Yes	Yes	Neck	Middle of neck ventral to head			Multiple		0.29299999999999998	0.30599999999999999	0.78	0.29949999999999999	Yes	Yes	M	2	No data			21	11	10	1R1_2R1_3R1_4R1_5_6_7_8_9_10R1_11_12_13_15_19_20R1_21R1_25_226_286R2_286R2G1CN3.5	9	3	6	1R1-7-8|2R1-3R1-5-6-9-10R1-11-15-19|4R1-12-13|20R1|21R1|25|226|286R2|286R2G1CN3.5	229000000	161900000	67100000	94800000	19
1051	1051T1	Unknown	'982000363303950	Unmatched	Clade_B	Clade_B-8	DFT1_2	DFT1_2I	14114C>T;7233A>C	Bronte Park	-42.124875000000003	146.46679	2017	26/05/2017	DFT1	Tissue	No	Yes	Yes	Facial/oral	chin			Singleton		0.434	0.45800000000000002	0.69199999999999995	0.44600000000000001	Yes	Yes	M	2	No data			18	9	9	1R1_2R1_3R1_4R1_5_6_7_8_9_10R1_11_12_13_15_19_20R1_21R1_25	6	1	5	1R1-7-8|2R1-3R1-5-6-9-10R1-11-15-19|4R1-12-13|20R1|21R1|25	225000000	159900000	65100000	94800000	18
1052	1052T1	Unknown	'982000361955737	Matched	Clade_C	Clade_C-3	DFT1_5	DFT1_5	2681C>T	Granville Harbour	-41.805917999999998	145.04102599999999	2017	18/06/2017	DFT1	Tissue	No	Yes	Yes	Facial/oral	Left lower jaw			Singleton		0.85399999999999998	0.76100000000000001	0.48599999999999999	0.8075	Yes	Yes	F	3	No data	M5 loss	Tetraploid (9)	30	12	18	1R1_2R1_3R1_4R1_5_6_6BM34_7_8_9_10R1_11_11BM34_12_13_15_16R34_17R34_18R34_19_52R2_53R1_61R1_62_68_97_104_203R2_345R1_823	9	3	6	1R1-7-8|2R1-3R1-5-6-9-10R1-11-15-19|4R1-12-13|6BM34-11BM34-16R34-17R34-18R34|52R2-53R1-61R1-68-823|62|97-104|203R2|345R1	1067307000	784800000	282507000	502293000
1053	1053T1	Unknown	'982000363282903; 982000363508997	Matched	Clade_C	Clade_C-3	DFT1_5	DFT1_5	2681C>T	Granville Harbour	-41.805917999999998	145.04102599999999	2017	20/06/2017	DFT1	Tissue	No	Yes	Yes	Facial/oral	Left lower jaw			Singleton		0.11600000000000001	0.108	0.30399999999999999	0.112	Yes	No	M	4	No data	No data	Tetraploid (9)
1054	1054T1	Unknown	'982000365130030	Unmatched	Clade_B	Clade_B-6	DFT1_0	DFT1_0	Novariants	Fentonbury	-42.653722000000002	146.76054099999999	2017	18/05/2017	DFT1	Tissue	No	Yes	Yes	Facial/oral	Front lower lip			Singleton		0.21199999999999999	0.19500000000000001	0.46	0.20349999999999999	Yes	Yes	F	2	No data			19	9	10	1R1_2R1_3R1_4R1_5_6_7_8_9_10R1_11_12_13_15_19_20R1_21R1_25_50	7	1	6	1R1-7-8|2R1-3R1-5-6-9-10R1-11-15-19|4R1-12-13|20R1|21R1|25|50	236100000	159900000	76200000	83700000	19
1055	1055T1	Unknown	'982000405791040	Matched	Clade_B	Clade_B-6	DFT1_0	DFT1_0	Novariants	Fentonbury	-42.653722000000002	146.76054099999999	2017	19/05/2017	DFT1	Tissue	No	Yes	Yes	Facial/oral	Front lower lip			Singleton		0.123	0.11799999999999999	Not Available	0.1205	Yes	No	F	2	No data	No data
1056	1056T2	Unknown	'982000405796344	Matched	Clade_B	Clade_B-6	DFT1_0	DFT1_0	Novariants	Fentonbury	-42.653722000000002	146.76054099999999	2017	21/05/2017	DFT1	Tissue	No	Yes	Yes	Facial/oral	Right side of face above eye			Singleton		0.33600000000000002	0.34799999999999998	Not Available	0.34200000000000003	Yes	Yes	F	1	No data			19	9	10	1R1_2R1_3R1_4R1_5_6_7_8_9_10R1_11_12_13_15_19_20R1_21R1_25_50	7	1	6	1R1-7-8|2R1-3R1-5-6-9-10R1-11-15-19|4R1-12-13|20R1|21R1|25|50	236100000	159900000	76200000	83700000	19
1058	1058T1	Unknown	'982000405978754	Matched	Clade_C	Clade_C-1	DFT1_23	DFT1_23	7328G>A	Wukalina	-40.917897000000004	148.240026	2017	16/08/2017	DFT1	Tissue	No	Yes	Yes	Facial/oral	left side of face			Singleton		0.378	0.40699999999999997	0.436	0.39250000000000002	Yes	Yes	F	2	No data			28	15	13	1R1_2R1_3R1_4R1_5_6_7_8_9_10R1_11_12_12BM1_13_15_19_51R1_115G1CN4_141_142_143_144_145_184_185_186_579_818	6	2	4	1R1-7-8|2R1-3R1-5-6-9-10R1-11-15-19|4R1-12-13|12BM1-115G1CN4-141-142-143-818|51R1-144-145-184-185-186|579	316200000	168100000	148100000	20000000	28
1059	1059T2	Unknown	'982000405484267	Matched	Clade_B	Clade_B-1	DFT1_26	DFT1_26	16390G>A	Wukalina	-40.917897000000004	148.240026	2017	15/08/2017	DFT1	Tissue	No	Yes	Yes	Facial/oral	Left side of chin ventral to head			Singleton		0.59	0.59799999999999998	0.8	0.59399999999999997	Yes	Yes	M	1	No data	M5 loss		27	10	17	1R1_2R1_3R1_4R1_5_6_6BM18_7_8_9_10R1_11_11BM18_12_13_15_16R18_17R18_18R18_19_172_220_221_222_307_510_137	6	2	4	1R1-7-8|2R1-3R1-5-6-9-10R1-11-15-19|4R1-12-13|6BM18-11BM18-16R18-17R18-18R18-137-172-220-221-222|307|510	307107000	185000000	122107000	62893000	27
1060	1060T1	Unknown	'982000365592205	Unmatched	Clade_C	Clade_C-1	DFT1_23	DFT1_23	7328G>A	Wukalina	-40.917897000000004	148.240026	2017	16/06/2017	DFT1	Tissue	No	Yes	Yes	Facial/oral	right side of face			Singleton		0.30099999999999999	0.33300000000000002	0.71299999999999997	0.317	Yes	Yes	M	2	No data			28	16	12	1R1_2R1_3R1_4R1_5_6_7_8_9_10R1_11_12_12BM1_13_15_19_28R2_51R1_115G1CN4_141_142_143_144_145_184_185_186_818	6	3	3	1R1-7-8|2R1-3R1-5-6-9-10R1-11-15-19|4R1-12-13|12BM1-115G1CN4-141-142-143-818|28R2|51R1-144-145-184-185-186	315800000	169300000	146500000	22800000	28
1061	1061T1	Unknown	'982000362816290	Unmatched	Clade_C	Clade_C-1	DFT1_23	DFT1_23	7328G>A	Wukalina	-40.917897000000004	148.240026	2017	16/06/2017	DFT1	Tissue	No	Yes	Yes	Facial/oral	Exterior front upper lip			Singleton		0.29699999999999999	0.32100000000000001	0.68600000000000005	0.309	Yes	Yes	F	2	No data			28	16	12	1R1_2R1_3R1_4R1_5_6_7_8_9_10R1_11_12_12BM1_13_15_19_28R2_51R1_115G1CN4_141_142_143_144_145_184_185_186_818	6	3	3	1R1-7-8|2R1-3R1-5-6-9-10R1-11-15-19|4R1-12-13|12BM1-115G1CN4-141-142-143-818|28R2|51R1-144-145-184-185-186	315800000	169300000	146500000	22800000	28
1062	1062T1	Unknown	'982000405946791	Unmatched	Clade_C	Clade_C-1	DFT1_23	DFT1_23A	7328G>A;10620T>A	Wukalina	-40.917897000000004	148.240026	2017	15/06/2017	DFT1	Tissue	No	Yes	Yes	Facial/oral	Interior front lower lip			Singleton		0.182	0.17699999999999999	0.437	0.17949999999999999	Yes	No	F	2	No data	No data
1064	1064T1	Unknown	'982000365112637	Matched	Clade_B	Clade_B-10	DFT1_2	DFT1_2	14114C>T	West Pencil Pine	-41.717464999999997	145.85587000000001	2017	23/08/2017	DFT1	Tissue	No	Yes	Yes	Unknown				Multiple		0.93	0.92600000000000005	0.92400000000000004	0.92800000000000005	Yes	Yes	F	2	No data (confirmed)			22	9	13	1R1_2R1_3R1_4R1_5_6_7_8_9_10R1_11_12_13_15_19_20R1_21R1_25_227_228_548_946	8	1	7	1R1-7-8|2R1-3R1-5-6-9-10R1-11-15-19|4R1-12-13|20R1|21R1|25|227-228-946|548	238100000	159900000	78200000	81700000	22
1064	1064T2	Unknown	'982000365112637	Matched	Clade_B	Clade_B-10	DFT1_2	DFT1_2	14114C>T	West Pencil Pine	-41.717464999999997	145.85587000000001	2017	23/08/2017	DFT1	Tissue	No	Yes	Yes	Unknown				Multiple		0.52400000000000002	0.50900000000000001	0.84599999999999997	0.51649999999999996	Yes	Yes	F	2	No data (confirmed)			18	9	9	1R1_2R1_3R1_4R1_5_6_7_8_9_10R1_11_12_13_15_19_20R1_21R1_25	6	1	5	1R1-7-8|2R1-3R1-5-6-9-10R1-11-15-19|4R1-12-13|20R1|21R1|25	225000000	159900000	65100000	94800000	18
1065	1065T1	Unknown	'982000405915086	Matched	Clade_B	Clade_B-10	DFT1_2	DFT1_2	14114C>T	West Pencil Pine	-41.717464999999997	145.85587000000001	2017	25/08/2017	DFT1	Tissue	No	Yes	Yes	Unknown				Singleton		0.59599999999999997	0.63300000000000001	0.80300000000000005	0.61450000000000005	Yes	Yes	M	1	No data (confirmed)			22	10	12	1R1_2R1_3R1_4R1_5_6_7_8_9_10R1_11_12_13_15_19_20R1_21R1_25_128_229R2_549_550	8	2	6	1R1-7-8|2R1-3R1-5-6-9-10R1-11-15-19|4R1-12-13|20R1|21R1|25|128|229R2-549-550	329100000	160900000	168200000	-7300000	22
1066	1066T1	Unknown	'982000365112208	Matched	Clade_A2	Clade_A2-11	DFT1_0	DFT1_0	Novariants	West Pencil Pine	-41.717464999999997	145.85587000000001	2017	25/08/2017	DFT1	Tissue	No	Yes	Yes	Unknown				Multiple		0.28000000000000003	0.313	0.61199999999999999	0.29649999999999999	Yes	Yes	F	2	No data (confirmed)	M5 loss		33	19	14	1R1_2R1_3R1_4R1_5_5G1CN4_5G1CN5_6_6BM17_7_8_9_10R1_11_11BM17_12_13_15_16R17_17R17_18R17_19_22_26_27R1_28R1_28R1G1CN4_29_29G1CN4_31_32_1834_1834G1CN4	9	4	5	1R1-7-8|2R1-3R1-5-6-9-10R1-11-15-19|4R1-12-13|5G1CN4-28R1-29-31-32-1834|5G1CN5|6BM17-11BM17-16R17-17R17-18R17|22|26-27R1|28R1G1CN4-29G1CN4-1834G1CN4	261107000	170700000	90407000	80293000	33
1066	1066T2	Unknown	'982000365112208	Matched	Clade_A2	Clade_A2-11	DFT1_0	DFT1_0	Novariants	West Pencil Pine	-41.717464999999997	145.85587000000001	2017	25/08/2017	DFT1	Tissue	No	Yes	Yes	Unknown				Multiple		0.78	0.76200000000000001	Not Available	0.77100000000000002	Yes	Yes	F	2	No data (confirmed)	M5 loss		33	19	14	1R1_2R1_3R1_4R1_5_5G1CN4_5G1CN5_6_6BM17_7_8_9_10R1_11_11BM17_12_13_15_16R17_17R17_18R17_19_22_26_27R1_28R1_28R1G1CN4_29_29G1CN4_31_32_1834_1834G1CN4	9	4	5	1R1-7-8|2R1-3R1-5-6-9-10R1-11-15-19|4R1-12-13|5G1CN4-28R1-29-31-32-1834|5G1CN5|6BM17-11BM17-16R17-17R17-18R17|22|26-27R1|28R1G1CN4-29G1CN4-1834G1CN4	261107000	170700000	90407000	80293000	33
1066	1066T3	Unknown	'982000365112208	Matched	Clade_B	Clade_B-10	DFT1_2	DFT1_2	14114C>T	West Pencil Pine	-41.717464999999997	145.85587000000001	2017	25/08/2017	DFT1	Tissue	No	Yes	Yes	Unknown				Multiple		0.85499999999999998	0.79800000000000004	0.873	0.82650000000000001	Yes	Yes	F	2	No data (confirmed)			21	9	12	1R1_2R1_3R1_4R1_5_6_7_8_9_10R1_11_12_13_15_19_20R1_21R1_25_227_228_946	7	1	6	1R1-7-8|2R1-3R1-5-6-9-10R1-11-15-19|4R1-12-13|20R1|21R1|25|227-228-946	234200000	159900000	74300000	85600000	21
1067	1067T1	Unknown	'982009106392944	Unmatched	Clade_A1	Clade_A1-1	DFT1_0	DFT1_0	Novariants	Freycinet	-42.194752999999999	148.30324300000001	2011	19/08/2011	DFT1	Tissue	No	Yes	Yes	Unknown				Singleton		0.33500000000000002	0.32800000000000001	Not Available	0.33150000000000002	Yes	Yes	F	Unknown	No data			38	31	7	1R1_2R1_3R1_4R1_5_6_7_8_9_10R1_11_12_13_15_19_48R1_55R1_56R1_63_63G1CN4_63G1CN5_63G1CN6_63G1CN7_63G1CN8_64_64G1CN4_64G1CN5_64G1CN6_64G1CN7_64G1CN8_65_65G1CN4_65G1CN5_65G1CN6_65G1CN7_65G1CN8_66_70	8	5	3	1R1-7-8|2R1-3R1-5-6-9-10R1-11-15-19|4R1-12-13|48R1-55R1-56R1-63-63G1CN4-64-64G1CN4-65-65G1CN4-66|63G1CN5-63G1CN6-64G1CN5-64G1CN6-65G1CN5-65G1CN6|63G1CN7-64G1CN7-65G1CN7|63G1CN8-64G1CN8-65G1CN8|70	299600000	247700000	51900000	195800000	38
1068	1068T1	Unknown	'982009105830109	Unmatched	Clade_A1	Clade_A1-1	DFT1_0	DFT1_0	Novariants	Freycinet	-42.194752999999999	148.30324300000001	2011	23/08/2011	DFT1	Tissue	No	Yes	Yes	Unknown				Multiple		0.51900000000000002	0.52400000000000002	Not Available	0.52149999999999996	Yes	Yes	F	Unknown	No data			38	31	7	1R1_2R1_3R1_4R1_5_6_7_8_9_10R1_11_12_13_15_19_48R1_55R1_56R1_63_63G1CN4_63G1CN5_63G1CN6_63G1CN7_63G1CN8_64_64G1CN4_64G1CN5_64G1CN6_64G1CN7_64G1CN8_65_65G1CN4_65G1CN5_65G1CN6_65G1CN7_65G1CN8_66_70	8	5	3	1R1-7-8|2R1-3R1-5-6-9-10R1-11-15-19|4R1-12-13|48R1-55R1-56R1-63-63G1CN4-64-64G1CN4-65-65G1CN4-66|63G1CN5-63G1CN6-64G1CN5-64G1CN6-65G1CN5-65G1CN6|63G1CN7-64G1CN7-65G1CN7|63G1CN8-64G1CN8-65G1CN8|70	299600000	247700000	51900000	195800000	38
1068	1068T4	Unknown	'982009105830109	Unmatched	Clade_A1	Clade_A1-1	DFT1_0	DFT1_0	Novariants	Freycinet	-42.194752999999999	148.30324300000001	2011	23/08/2011	DFT1	Tissue	No	Yes	Yes	Unknown				Multiple		0.54300000000000004	0.56599999999999995	Not Available	0.55449999999999999	Yes	Yes	F	Unknown	No data			35	28	7	1R1_2R1_3R1_4R1_5_6_7_8_9_10R1_11_12_13_15_19_48R1_55R1_56R1_63_63G1CN4_63G1CN5_63G1CN6_63G1CN7_64_64G1CN4_64G1CN5_64G1CN6_64G1CN7_65_65G1CN4_65G1CN5_65G1CN6_65G1CN7_66_70	7	4	3	1R1-7-8|2R1-3R1-5-6-9-10R1-11-15-19|4R1-12-13|48R1-55R1-56R1-63-63G1CN4-64-64G1CN4-65-65G1CN4-66|63G1CN5-63G1CN6-64G1CN5-64G1CN6-65G1CN5-65G1CN6|63G1CN7-64G1CN7-65G1CN7|70	287100000	235200000	51900000	183300000	35
1069	1069T2	Unknown	'982009106502994	Unmatched	Clade_A1	Clade_A1-1	DFT1_0	DFT1_0	Novariants	Freycinet	-42.194752999999999	148.30324300000001	2011	26/08/2011	DFT1	Tissue	No	Yes	Yes	Unknown				Singleton		0.59799999999999998	0.57899999999999996	Not Available	0.58850000000000002	Yes	Yes	M	Unknown	No data			38	31	7	1R1_2R1_3R1_4R1_5_6_7_8_9_10R1_11_12_13_15_19_48R1_55R1_56R1_63_63G1CN4_63G1CN5_63G1CN6_63G1CN7_63G1CN8_64_64G1CN4_64G1CN5_64G1CN6_64G1CN7_64G1CN8_65_65G1CN4_65G1CN5_65G1CN6_65G1CN7_65G1CN8_66_70	8	5	3	1R1-7-8|2R1-3R1-5-6-9-10R1-11-15-19|4R1-12-13|48R1-55R1-56R1-63-63G1CN4-64-64G1CN4-65-65G1CN4-66|63G1CN5-63G1CN6-64G1CN5-64G1CN6-65G1CN5-65G1CN6|63G1CN7-64G1CN7-65G1CN7|63G1CN8-64G1CN8-65G1CN8|70	299600000	247700000	51900000	195800000	38
1070	1070T1	Unknown	'982000190699767	Unmatched	Clade_A1	Clade_A1-1	DFT1_0	DFT1_0	Novariants	Freycinet	-42.194752999999999	148.30324300000001	2012	04/09/2012	DFT1	Tissue	No	No (missing data)	Yes	Unknown				Multiple		0.104	Not Available	Not Available	0.104	No	No	M	Unknown	No data	No data
1070	1070T2	Unknown	'982000190699767	Unmatched	Clade_A1	Clade_A1-1	DFT1_0	DFT1_0	Novariants	Freycinet	-42.194752999999999	148.30324300000001	2012	04/09/2012	DFT1	Tissue	No	Yes	Yes	Unknown				Multiple		0.88300000000000001	0.86	Not Available	0.87150000000000005	Yes	Yes	M	Unknown	No data			38	31	7	1R1_2R1_3R1_4R1_5_6_7_8_9_10R1_11_12_13_15_19_48R1_55R1_56R1_63_63G1CN4_63G1CN5_63G1CN6_63G1CN7_63G1CN8_64_64G1CN4_64G1CN5_64G1CN6_64G1CN7_64G1CN8_65_65G1CN4_65G1CN5_65G1CN6_65G1CN7_65G1CN8_66_70	8	5	3	1R1-7-8|2R1-3R1-5-6-9-10R1-11-15-19|4R1-12-13|48R1-55R1-56R1-63-63G1CN4-64-64G1CN4-65-65G1CN4-66|63G1CN5-63G1CN6-64G1CN5-64G1CN6-65G1CN5-65G1CN6|63G1CN7-64G1CN7-65G1CN7|63G1CN8-64G1CN8-65G1CN8|70	299600000	247700000	51900000	195800000	38
1071	1071T1	Unknown	'982000190607744	Unmatched	Clade_A2	Clade_A2-7	DFT1_27	DFT1_27A1a	1824T>C;6075G>A;1296G>A;16390G>A	Freycinet	-42.194752999999999	148.30324300000001	2012	30/11/2012	DFT1	Tissue	No	Yes	Yes	Unknown				Singleton		0.51900000000000002	0.52300000000000002	0.78400000000000003	0.52100000000000002	Yes	Yes	F	Unknown	No data			20	10	10	1R1_2R1_3R1_4R1_5_6_7_8_9_10R1_11_12_13_15_19_20R2_22_26_27R1_127	7	2	5	1R1-7-8|2R1-3R1-5-6-9-10R1-11-15-19|4R1-12-13|20R2|22|26-27R1|127	263900000	180700000	83200000	97500000	20
1072	1072T1	Unknown	'982000190533071	Unmatched	Clade_A2	Clade_A2-7	DFT1_31	DFT1_31	4422G>A	Freycinet	-42.194752999999999	148.30324300000001	2012	03/12/2012	DFT1	Tissue	No	No (missing data)	Yes	Unknown				Multiple		0.156	0.20699999999999999	0.33300000000000002	0.18149999999999999	No	No	F	Unknown	No data	No data
1072	1072T4	Unknown	'982000190533071	Unmatched	Clade_A2	Clade_A2-7	DFT1_0	DFT1_0	Novariants	Freycinet	-42.194752999999999	148.30324300000001	2012	03/12/2012	DFT1	Tissue	No	Yes	Yes	Unknown				Multiple		0.36599999999999999	0.35799999999999998	Not Available	0.36199999999999999	Yes	Yes	F	Unknown	No data	M5 loss		25	10	15	1R1_2R1_3R1_4R1_5_6_6BM15_7_8_9_10R1_11_11BM15_12_13_15_16R15_17R15_18R15_19_20R2_22_26_27R1_127	8	2	6	1R1-7-8|2R1-3R1-5-6-9-10R1-11-15-19|4R1-12-13|6BM15-11BM15-16R15-17R15-18R15|20R2|22|26-27R1|127	272107000	180700000	91407000	89293000	25
1073	1073T2	Unknown	'982009104820975	Unmatched	Clade_A2	Clade_A2-7	DFT1_27	DFT1_27A1a	1824T>C;6075G>A;1296G>A;16390G>A	Freycinet	-42.194752999999999	148.30324300000001	2013	06/10/2013	DFT1	Tissue	No	Yes	Yes	Unknown				Multiple		0.40899999999999997	0.38600000000000001	0.75	0.39750000000000002	Yes	Yes	F	Unknown	No data			20	10	10	1R1_2R1_3R1_4R1_5_6_7_8_9_10R1_11_12_13_15_19_20R2_22_26_27R1_127	7	2	5	1R1-7-8|2R1-3R1-5-6-9-10R1-11-15-19|4R1-12-13|20R2|22|26-27R1|127	263900000	180700000	83200000	97500000	20
1073	1073T5	Unknown	'982009104820975	Unmatched	Clade_B	Clade_B-9	DFT1_2	DFT1_2	14114C>T	Freycinet	-42.194752999999999	148.30324300000001	2013	06/10/2013	DFT1	Tissue	No	Yes	Yes	Unknown				Multiple		0.55500000000000005	0.52	0.749	0.53749999999999998	Yes	Yes	F	Unknown	No data			18	9	9	1R1_2R1_3R1_4R1_5_6_7_8_9_10R1_11_12_13_15_19_20R1_21R1_25	6	1	5	1R1-7-8|2R1-3R1-5-6-9-10R1-11-15-19|4R1-12-13|20R1|21R1|25	225000000	159900000	65100000	94800000	18
1073	1073T6	Unknown	'982009104820975	Unmatched	Clade_B	Clade_B-9	DFT1_2	DFT1_2	14114C>T	Freycinet	-42.194752999999999	148.30324300000001	2013	06/10/2013	DFT1	Tissue	No	Yes	Yes	Unknown				Multiple		0.39400000000000002	Not Available	0.63700000000000001	0.39400000000000002	No	Yes	F	Unknown	No data			18	9	9	1R1_2R1_3R1_4R1_5_6_7_8_9_10R1_11_12_13_15_19_20R1_21R1_25	6	1	5	1R1-7-8|2R1-3R1-5-6-9-10R1-11-15-19|4R1-12-13|20R1|21R1|25	225000000	159900000	65100000	94800000	18
1075	1075T1	Unknown	'982000190695064	Unmatched	Clade_A2	Clade_A2-7	DFT1_0	DFT1_0	Novariants	Freycinet	-42.194752999999999	148.30324300000001	2012	01/10/2012	DFT1	Tissue	No	Yes	Yes	Unknown				Singleton		0.23300000000000001	Not Available	Not Available	0.23300000000000001	No	Yes	M	Unknown	No data	M5 loss		25	10	15	1R1_2R1_3R1_4R1_5_6_6BM15_7_8_9_10R1_11_11BM15_12_13_15_16R15_17R15_18R15_19_20R2_22_26_27R1_127	8	2	6	1R1-7-8|2R1-3R1-5-6-9-10R1-11-15-19|4R1-12-13|6BM15-11BM15-16R15-17R15-18R15|20R2|22|26-27R1|127	272107000	180700000	91407000	89293000	25
1076	1076T1	Unknown	'982000362826645	Matched	Clade_B	Clade_B-9	DFT1_2	DFT1_2	14114C>T	Freycinet	-42.194752999999999	148.30324300000001	2015	11/09/2015	DFT1	Tissue	No	Yes	Yes	Unknown				Multiple		0.79100000000000004	Not Available	0.78700000000000003	0.79100000000000004	No	Yes	M	Unknown	No data		Tetraploid (7)	24	11	13	1R1_2R1_3R1_4R1_5_6_7_8_9_10R1_11_12_13_15_19_20R1_21R1_25_860_941_950_952_1009_1859	8	2	6	1R1-7-8|2R1-3R1-5-6-9-10R1-11-15-19|4R1-12-13|20R1|21R1|25|860-1009|941-950-952-1859	275704504	172100000	103604504	68495496
1076	1076T2	Unknown	'982000362826645	Matched	Clade_B	Clade_B-9	DFT1_2	DFT1_2	14114C>T	Freycinet	-42.194752999999999	148.30324300000001	2015	11/09/2015	DFT1	Tissue	No	Yes	Yes	Unknown				Multiple		0.52500000000000002	Not Available	0.59799999999999998	0.52500000000000002	No	Yes	M	Unknown	No data	M5 loss	Tetraploid (7)	25	11	14	1R1_2R1_3R1_4R1_5_6_6BM27_7_8_9_10R1_11_11BM27_12_13_15_16R27_17R27_18R27_19_20R1_21R1_25_860_1009	8	2	6	1R1-7-8|2R1-3R1-5-6-9-10R1-11-15-19|4R1-12-13|6BM27-11BM27-16R27-17R27-18R27|20R1|21R1|25|860-1009	245407000	172100000	73307000	98793000
1077	1077T1	Unknown	'982000356426095	Matched	Clade_B	Clade_B-9	DFT1_2	DFT1_2	14114C>T	Freycinet	-42.194752999999999	148.30324300000001	2015	01/11/2015	DFT1	Tissue	No	Yes	Yes	Unknown				Singleton		0.80100000000000005	Not Available	0.83599999999999997	0.80100000000000005	No	Yes	F	Unknown	No data			18	9	9	1R1_2R1_3R1_4R1_5_6_7_8_9_10R1_11_12_13_15_19_20R1_21R1_25	6	1	5	1R1-7-8|2R1-3R1-5-6-9-10R1-11-15-19|4R1-12-13|20R1|21R1|25	225000000	159900000	65100000	94800000	18
1078	1078T2	Unknown	'982000356426081	Matched	Clade_B	Clade_B-9	DFT1_2	DFT1_2	14114C>T	Freycinet	-42.194752999999999	148.30324300000001	2016	08/10/2016	DFT1	Tissue	No	Yes	Yes	Unknown				Multiple		0.40899999999999997	Not Available	0.56000000000000005	0.40899999999999997	No	Yes	F	Unknown	No data			18	9	9	1R1_2R1_3R1_4R1_5_6_7_8_9_10R1_11_12_13_15_19_20R1_21R1_25	6	1	5	1R1-7-8|2R1-3R1-5-6-9-10R1-11-15-19|4R1-12-13|20R1|21R1|25	225000000	159900000	65100000	94800000	18
1078	1078T3	Unknown	'982000356426081	Matched	Clade_B	Clade_B-9	DFT1_2	DFT1_2	14114C>T	Freycinet	-42.194752999999999	148.30324300000001	2016	08/10/2016	DFT1	Tissue	No	Yes	Yes	Unknown				Multiple		0.47299999999999998	Not Available	0.72699999999999998	0.47299999999999998	No	Yes	F	Unknown	No data			18	9	9	1R1_2R1_3R1_4R1_5_6_7_8_9_10R1_11_12_13_15_19_20R1_21R1_25	6	1	5	1R1-7-8|2R1-3R1-5-6-9-10R1-11-15-19|4R1-12-13|20R1|21R1|25	225000000	159900000	65100000	94800000	18
1078	1078T4	Unknown	'982000356426081	Matched	Clade_B	Clade_B-9	DFT1_2	DFT1_2	14114C>T	Freycinet	-42.194752999999999	148.30324300000001	2016	08/10/2016	DFT1	Tissue	No	Yes (italicised)	Yes	Unknown				Multiple		0.31	Not Available	0.68600000000000005	0.31	No	Yes	F	Unknown	No data			19	10	9	1R1_2R1_3R1_4R1_5_6_7_8_9_10R1_11_12_13_15_19_20R1_21R1_25_953R1	7	2	5	1R1-7-8|2R1-3R1-5-6-9-10R1-11-15-19|4R1-12-13|20R1|21R1|25|953R1	227200000	162100000	65100000	97000000	19
1079	1079T1	Unknown	'982000362833391	Matched	Clade_B	Clade_B-9	DFT1_2	DFT1_2H	14114C>T;10935G>A	Freycinet	-42.194752999999999	148.30324300000001	2016	29/11/2016	DFT1	Tissue	No	Yes (italicised)	Yes	Unknown				Multiple		0.316	Not Available	0.69899999999999995	0.316	No	Yes	M	Unknown	No data			20	9	11	1R1_2R1_3R1_4R1_5_6_7_8_9_10R1_11_12_13_15_19_20R1_21R1_25_870_872	7	1	6	1R1-7-8|2R1-3R1-5-6-9-10R1-11-15-19|4R1-12-13|20R1|21R1|25|870-872	256500000	159900000	96600000	63300000	20
1079	1079T2	Unknown	'982000362833391	Matched	Clade_B	Clade_B-9	DFT1_2	DFT1_2H	14114C>T;10935G>A	Freycinet	-42.194752999999999	148.30324300000001	2016	29/11/2016	DFT1	Tissue	No	Yes (italicised)	Yes	Unknown				Multiple		0.73499999999999999	Not Available	0.82099999999999995	0.73499999999999999	No	Yes	M	Unknown	No data			20	9	11	1R1_2R1_3R1_4R1_5_6_7_8_9_10R1_11_12_13_15_19_20R1_21R1_25_870_872	7	1	6	1R1-7-8|2R1-3R1-5-6-9-10R1-11-15-19|4R1-12-13|20R1|21R1|25|870-872	256500000	159900000	96600000	63300000	20
1080	1080T1	Unknown	'982000362833456	Matched	Clade_B	Clade_B-9	DFT1_2	DFT1_2	14114C>T	Freycinet	-42.194752999999999	148.30324300000001	2016	20/12/2016	DFT1	Tissue	No	Yes	Yes	Unknown				Singleton		0.66800000000000004	0.66	0.71199999999999997	0.66400000000000003	Yes	Yes	F	Unknown	No data			18	9	9	1R1_2R1_3R1_4R1_5_6_7_8_9_10R1_11_12_13_15_19_20R1_21R1_25	6	1	5	1R1-7-8|2R1-3R1-5-6-9-10R1-11-15-19|4R1-12-13|20R1|21R1|25	225000000	159900000	65100000	94800000	18
1081	1081T1	Unknown	'982000405977793	Matched	Clade_A2	Clade_A2-5	DFT1_0	DFT1_0	Novariants	Stony Head	-41.014394000000003	147.013229	2017	20/09/2017	DFT1	Tissue	No	Yes	Yes	Facial/oral	interior left upper lip			Singleton		0.23300000000000001	Not Available	0.32100000000000001	0.23300000000000001	No	Yes	F	Unknown	Strain 1 tetraploid	M5 loss	Tetraploid (4)	29	14	15	1R1_2R1_3R1_4R1_5_6_6BM13_7_8_9_10R1_11_11BM13_12_13_15_16R13_17R13_18R13_19_22_26_27R1_40R1_43R1_49R1_60_169_217	8	3	5	1R1-7-8|2R1-3R1-5-6-9-10R1-11-15-19|4R1-12-13|6BM13-11BM13-16R13-17R13-18R13-60|22|26-27R1|40R1-43R1-49R1|169-217	353850145	262043145	91807000	170236145
1082	1082T1	Unknown	'982000191010136	Matched	Clade_A2	Clade_A2-5	DFT1_0	DFT1_0	Novariants	Stony Head	-41.014394000000003	147.013229	2017	20/09/2017	DFT1	Tissue	No	Yes	Yes	Facial/oral	right side of face			Singleton		0.77100000000000002	Not Available	Not Available	0.77100000000000002	No	Yes	M	4	Strain 1 tetraploid	M5 loss	Tetraploid (4)	29	14	15	1R1_2R1_3R1_4R1_5_6_6BM13_7_8_9_10R1_11_11BM13_12_13_15_16R13_17R13_18R13_19_22_26_27R1_40R1_43R1_49R1_60_169_217	8	3	5	1R1-7-8|2R1-3R1-5-6-9-10R1-11-15-19|4R1-12-13|6BM13-11BM13-16R13-17R13-18R13-60|22|26-27R1|40R1-43R1-49R1|169-217	353850145	262043145	91807000	170236145
1191	1191T1	Unknown	'982000363000552	Matched	Clade_B	Clade_B-9	DFT1_2	DFT1_2J	14114C>T, 1956G>A	Freycinet	-42.194752999999999	148.30324300000001	2018	01/02/2018	DFT1	Tissue	No	Yes	Yes	Unknown				Multiple		0.86599999999999999	0.82199999999999995	0.89100000000000001	0.84399999999999997	Yes	Yes	M	3	No data (confirmed)	M5 loss	Tetraploid (7)	25	13	12	1R1_2R1_3R1_4R1_5_6_6BM28_7_8_9_10R1_11_11BM28_12_13_15_16R28_19_20R1_21R1_25_860_1009_1860_1861	9	3	6	1R1-7-8|2R1-3R1-5-6-9-10R1-11-15-19|4R1-12-13|6BM28-11BM28-16R28|20R1|21R1|25|860-1009|1860-1861	410822170	338922170	71900000	267022170
1191	1191T2	Unknown	'982000363000552	Matched	Clade_B	Clade_B-9	DFT1_2	DFT1_2J	14114C>T, 1956G>A	Freycinet	-42.194752999999999	148.30324300000001	2018	01/02/2018	DFT1	Tissue	No	Yes	Yes	Unknown				Multiple		0.89900000000000002	0.875	0.88800000000000001	0.88700000000000001	Yes	Yes	M	3	No data (confirmed)		Tetraploid (7)	20	11	9	1R1_2R1_3R1_4R1_5_6_7_8_9_10R1_11_12_13_15_19_20R1_21R1_25_860_1009	7	2	5	1R1-7-8|2R1-3R1-5-6-9-10R1-11-15-19|4R1-12-13|20R1|21R1|25|860-1009	237200000	172100000	65100000	107000000
1191	1191T4	Unknown	'982000363000552	Matched	Clade_B	Clade_B-9	DFT1_2	DFT1_2J	14114C>T, 1956G>A	Freycinet	-42.194752999999999	148.30324300000001	2018	01/02/2018	DFT1	Tissue	No	Yes	Yes	Unknown				Multiple		0.252	0.26400000000000001	0.63800000000000001	0.25800000000000001	Yes	Yes	M	3	No data (confirmed)		Tetraploid (7)	20	11	9	1R1_2R1_3R1_4R1_5_6_7_8_9_10R1_11_12_13_15_19_20R1_21R1_25_860_1009	7	2	5	1R1-7-8|2R1-3R1-5-6-9-10R1-11-15-19|4R1-12-13|20R1|21R1|25|860-1009	237200000	172100000	65100000	107000000
1191	1191T5	Unknown	'982000363000552	Matched	Clade_B	Clade_B-9	DFT1_2	DFT1_2J	14114C>T, 1956G>A	Freycinet	-42.194752999999999	148.30324300000001	2018	01/02/2018	DFT1	Tissue	No	Yes	Yes	Unknown				Multiple		0.56200000000000006	0.52400000000000002	0.73499999999999999	0.54300000000000004	Yes	Yes	M	3	No data (confirmed)		Tetraploid (7)	20	11	9	1R1_2R1_3R1_4R1_5_6_7_8_9_10R1_11_12_13_15_19_20R1_21R1_25_860_1009	7	2	5	1R1-7-8|2R1-3R1-5-6-9-10R1-11-15-19|4R1-12-13|20R1|21R1|25|860-1009	237200000	172100000	65100000	107000000
1192	1192T1	Unknown	'982000365610211	Matched	Clade_B	Clade_B-9	DFT1_2	DFT1_2J1	14114C>T;1956G>A;15220T>C	Freycinet	-42.194752999999999	148.30324300000001	2018	01/02/2018	DFT1	Tissue	No	Yes	Yes	Unknown				Singleton		0.81399999999999995	0.78500000000000003	0.67700000000000005	0.79949999999999999	Yes	Yes	F	2	No data (confirmed)		Tetraploid (7)	23	11	12	1R1_2R1_3R1_4R1_5_6_7_8_9_10R1_11_12_13_15_17R29_18R29_19_20R1_21R1_25_860_932_1009	8	2	6	1R1-7-8|2R1-3R1-5-6-9-10R1-11-15-19|4R1-12-13|17R29-18R29-932|20R1|21R1|25|860-1009	272807000	172100000	100707000	71393000
1193	1193T1	Unknown	'982000363022381	Unmatched	Clade_B	Clade_B-9	DFT1_2	DFT1_2J	14114C>T, 1956G>A	Freycinet	-42.194752999999999	148.30324300000001	2018	01/02/2018	DFT1	Tissue	No	Yes	Yes	Unknown				Singleton		0.498	0.52900000000000003	0.78500000000000003	0.51349999999999996	Yes	Yes	M	4	No data (confirmed)		Tetraploid (7)	22	13	9	1R1_2R1_3R1_4R1_5_5G3CN4_6_7_8_9_10R1_11_12_13_15_19_20R1_21R1_25_83_860_1009	8	3	5	1R1-7-8|2R1-3R1-5-6-9-10R1-11-15-19|4R1-12-13|5G3CN4-83|20R1|21R1|25|860-1009	459100000	394000000	65100000	328900000
1194	1194T1	Unknown	'982000365610133	Unmatched	Clade_B	Clade_B-9	DFT1_2	DFT1_2	14114C>T	Freycinet	-42.194752999999999	148.30324300000001	2018	01/02/2018	DFT1	Tissue	No	Yes	Yes	Unknown				Singleton		0.26300000000000001	0.26500000000000001	0.51600000000000001	0.26400000000000001	Yes	Yes	F	2	No data (confirmed)			18	9	9	1R1_2R1_3R1_4R1_5_6_7_8_9_10R1_11_12_13_15_19_20R1_21R1_25	6	1	5	1R1-7-8|2R1-3R1-5-6-9-10R1-11-15-19|4R1-12-13|20R1|21R1|25	225000000	159900000	65100000	94800000	18
1195	1195T1	Unknown	'982000365119589	Unmatched	Clade_B	Clade_B-9	DFT1_2	DFT1_2	14114C>T	Freycinet	-42.194752999999999	148.30324300000001	2018	01/02/2018	DFT1	Tissue	No	Yes	Yes	Unknown				Multiple		0.80900000000000005	0.77400000000000002	0.86899999999999999	0.79149999999999998	Yes	Yes	M	3	No data (confirmed)			18	9	9	1R1_2R1_3R1_4R1_5_6_7_8_9_10R1_11_12_13_15_19_20R1_21R1_25	6	1	5	1R1-7-8|2R1-3R1-5-6-9-10R1-11-15-19|4R1-12-13|20R1|21R1|25	225000000	159900000	65100000	94800000	18
1195	1195T2	Unknown	'982000365119589	Unmatched	Clade_B	Clade_B-9	DFT1_2	DFT1_2	14114C>T	Freycinet	-42.194752999999999	148.30324300000001	2018	01/02/2018	DFT1	Tissue	No	Yes	Yes	Unknown				Multiple		0.56499999999999995	0.56399999999999995	0.64500000000000002	0.5645	Yes	Yes	M	3	No data (confirmed)			18	9	9	1R1_2R1_3R1_4R1_5_6_7_8_9_10R1_11_12_13_15_19_20R1_21R1_25	6	1	5	1R1-7-8|2R1-3R1-5-6-9-10R1-11-15-19|4R1-12-13|20R1|21R1|25	225000000	159900000	65100000	94800000	18
1196	1196T1	Unknown	'982000363017554	Unmatched	Clade_B	Clade_B-9	DFT1_2	DFT1_2J	14114C>T, 1956G>A	Freycinet	-42.194752999999999	148.30324300000001	2018	01/02/2018	DFT1	Tissue	No	Yes	Yes	Unknown				Multiple		0.66200000000000003	0.64100000000000001	0.82099999999999995	0.65149999999999997	Yes	Yes	M	4	No data (confirmed)		Tetraploid (7)	20	11	9	1R1_2R1_3R1_4R1_5_6_7_8_9_10R1_11_12_13_15_19_20R1_21R1_25_860_1009	7	2	5	1R1-7-8|2R1-3R1-5-6-9-10R1-11-15-19|4R1-12-13|20R1|21R1|25|860-1009	237200000	172100000	65100000	107000000
1196	1196T2	Unknown	'982000363017554	Unmatched	Clade_B	Clade_B-9	DFT1_2	DFT1_2J2	14114C>T;1956G>A;15171G>A	Freycinet	-42.194752999999999	148.30324300000001	2018	01/02/2018	DFT1	Tissue	No	Yes	Yes	Unknown				Multiple		0.69099999999999995	0.68	0.89600000000000002	0.6855	Yes	Yes	M	4	No data (confirmed)		Tetraploid (7)	20	11	9	1R1_2R1_3R1_4R1_5_6_7_8_9_10R1_11_12_13_15_19_20R1_21R1_25_860_1009	7	2	5	1R1-7-8|2R1-3R1-5-6-9-10R1-11-15-19|4R1-12-13|20R1|21R1|25|860-1009	237200000	172100000	65100000	107000000
1197	1197T1	Unknown	'982000402226625	Unmatched	Clade_B	Clade_B-9	DFT1_2	DFT1_2	14114C>T	Freycinet	-42.194752999999999	148.30324300000001	2018	01/02/2018	DFT1	Tissue	No	Yes	Yes	Unknown				Multiple		0.503	Not Available	0.73699999999999999	0.503	Yes	Yes	F	4	No data (confirmed)			18	9	9	1R1_2R1_3R1_4R1_5_6_7_8_9_10R1_11_12_13_15_19_20R1_21R1_25	6	1	5	1R1-7-8|2R1-3R1-5-6-9-10R1-11-15-19|4R1-12-13|20R1|21R1|25	225000000	159900000	65100000	94800000	18
1197	1197T2	Unknown	'982000402226625	Unmatched	Clade_B	Clade_B-9	DFT1_2	DFT1_2J	14114C>T, 1956G>A	Freycinet	-42.194752999999999	148.30324300000001	2018	01/02/2018	DFT1	Tissue	No	Yes	Yes	Unknown				Multiple		0.621	0.6	0.80700000000000005	0.61050000000000004	Yes	Yes	F	4	No data (confirmed)		Tetraploid (7)	20	11	9	1R1_2R1_3R1_4R1_5_6_7_8_9_10R1_11_12_13_15_19_20R1_21R1_25_860_1009	7	2	5	1R1-7-8|2R1-3R1-5-6-9-10R1-11-15-19|4R1-12-13|20R1|21R1|25|860-1009	237200000	172100000	65100000	107000000
1197	1197T3	Unknown	'982000402226625	Unmatched	Clade_B	Clade_B-9	DFT1_2	DFT1_2	14114C>T	Freycinet	-42.194752999999999	148.30324300000001	2018	01/02/2018	DFT1	Tissue	No	Yes	Yes	Unknown				Multiple		0.38600000000000001	0.38100000000000001	0.76200000000000001	0.38350000000000001	Yes	Yes	F	4	No data (confirmed)			18	9	9	1R1_2R1_3R1_4R1_5_6_7_8_9_10R1_11_12_13_15_19_20R1_21R1_25	6	1	5	1R1-7-8|2R1-3R1-5-6-9-10R1-11-15-19|4R1-12-13|20R1|21R1|25	225000000	159900000	65100000	94800000	18
[truncated: 13 more columns]

## Sheet: Table_S1B
Sample_ID	Microchip	Location	Gender	Year	Tumour status	WGS available	MIPs available	Telseq_Length_Estimate	SangerStudyIDs
1H	'982009102430562	Forestier	Female	2007	Matched	Yes	No	2650.16	3999STDY6383555
2H	'982009100773235	Forestier	Male	2007	Matched	Yes	No	3858.05	3999STDY6383557
3H	'982009100864506	Forestier	Female	2007	Matched	Yes	No	2778.4	3999STDY6383559
4H	'982009100866164	Forestier	Female	2007	Matched	Yes	No	3062.18	3999STDY6383561
5H	'982009104239392	Forestier	Male	2007	Matched	Yes	No	3428.98	3999STDY6383563
6H	'982009102521579	Forestier	Male	2007	Matched	Yes	No	2453.77	3999STDY6383565
7H	'982009104239476	Forestier	Female	2008	Matched	Yes	No	3137.83	3999STDY6383567
8H	'982009104869208	West Pencil Pine	Female	2007	Matched	Yes	No	4430.67	3999STDY6383568
9H	'982009104968776	West Pencil Pine	Female	2007	Matched	Yes	No	3875.69	3999STDY6383570
11H	'Unknown	Nugent	Female	2006	Matched	Yes	No	2997.81	3999STDY6383573
12H	'Unknown	Tarraleah	Male	2006	Matched	Yes	No	8556.91	3999STDY6383577
13H	'Unknown	Forestier	Male	2006	Unmatched	Yes	No	3249.79	3999STDY6383578
14H	'Unknown	Mole Creek	Male	2006	Matched	Yes	No	3304.04	3999STDY6383580
15H	'Unknown	Yolla	Male	2006	Unmatched	Yes	No	7752.77	3999STDY6383581
16H	'Unknown	St Marys	Male	2006	Unmatched	Yes	No	57557.1	3999STDY6383582
17H	'Unknown	St Marys	Male	2006	Matched	Yes	No	2669.13	3999STDY6383584
18H	'Unknown	St Marys	Male	2006	Matched	Yes	No	3119.22	3999STDY6383586
19H	'982009100818962	St Marys	Male	2006	Matched	Yes	No	3014.2	3999STDY6383588
23H	'Unknown	Captive	Male	2004	Unmatched	Yes	No	2815.63	3999STDY6383593
24H	'Unknown	Smithton	Female	2006	Unmatched	Yes	No	1543.4	3999STDY6383594
25H	'Unknown	Burnie	Female	2006	Unmatched	Yes	No	5022.8	3999STDY6383595
26H	'Unknown	Wynyard	Male	2007	Unmatched	Yes	No	3920.06	3999STDY6383596
27H	'Unknown	Wynyard	Male	2007	Unmatched	Yes	No	3429.69	3999STDY6383597
28H	'Unknown	Boat Harbour	Male	2007	Unmatched	Yes	No	2556.03	3999STDY6383598
29H	'Unknown	Wynyard	Male	2007	Unmatched	Yes	No	1235.31	3999STDY6383599
30H	'No microchip	Westbury	Male	2007	Unmatched	Yes	No	1578.67	3999STDY6352571
31H1a	'982009100758259	Forestier	Male	2007	Matched	Yes	No	1457.93	3999STDY6352575
32H	'982009100818058	Fentonbury	Female	2007	Matched	Yes	No	2744.79	3999STDY6399978
33H3a	'982009102737669	Forestier	Male	2007	Matched	Yes	No	1723.59	3999STDY6352582
34H1a	'982009100830635; 00065DC74E	Forestier	Female	2007	Matched	Yes	No	2413.51	3999STDY6352588
36H1a	'982009102375594	Reedy Marsh	Female	2007	Matched	Yes	No	1051.76	3999STDY6352590
37H1a	'982009104235325	Wukalina	Male	2007	Matched	Yes	No	2451.85	3999STDY6383519
39H1a	'982009100322308	Forestier	Male	2007	Matched	Yes	No	1065.99	3999STDY6352597
40H1a	'985120015992583	Forestier	Female	2007	Matched	Yes	No	2396.91	3999STDY6352606
41H1a	'982009100848554	Forestier	Female	2007	Unmatched	Yes	No	954.93	3999STDY6352608
45H4	'982009104349396	Forestier	Male	2008	Matched	Yes	No	2224.18	3999STDY6352612
46H2	'982009104247056	Gladstone	Female	2008	Matched	Yes	No	1953.11	3999STDY6352614
47H1	'982009100840254	Westbury	Male	2008	Matched	Yes	No	1879.85	3999STDY6352616
49H1	Unknown	Mangalore	Female	2007	Matched	Yes	No	1753.77	3999STDY6352621
50H1	'982009104928332	Kempton	Intersex	2008	Matched	Yes	No	2180.75	3999STDY6352624
51H3	'982009104847105	Kempton	Male	2008	Matched	Yes	Yes	1750.2	MPG_Devil7531395,MPG_Devil7531395,3999STDY6352630
51H3a	'982009104847105	Kempton	Male	2008	Matched	Yes	Yes	2439.58	MPG_Devil7678619,MPG_Devil7678619,3999STDY7238464
52H1	'982009105188074	Freycinet	Male	2008	Matched	Yes	Yes	1982.86	MPG_Devil7531398,MPG_Devil7531398,3999STDY6352633
52H1a	'982009105188074	Freycinet	Male	2008	Matched	Yes	Yes	3486.71	MPG_Devil7678618,MPG_Devil7678618,3999STDY7238463
53H2	'982009100418077	Narawntapu	Male	2007	Matched	Yes	Yes	1310.96	MPG_Devil7531401,MPG_Devil7531401,3999STDY6352636
54H1	'982009104855230	West Pencil Pine	Female	2008	Matched	Yes	Yes	1406.16	MPG_Devil7531403,MPG_Devil7531403,3999STDY6352638
55H	'000658C2A0	Mole Creek (captive)	Male	2007	Matched	Yes	Yes	2097.8	MPG_Devil7531408,MPG_Devil7531408,3999STDY6352643
56H2	'982009104808995	Upper Natone	Male	2007	Matched	Yes	Yes	1141.66	MPG_Devil7531411,MPG_Devil7531411,3999STDY6352646
57H2	'982009104859904	Narawntapu	Male	2008	Matched	Yes	Yes	1565.13	MPG_Devil7531413,MPG_Devil7531413,3999STDY6352648
58H1	'982009100906846	Forestier	Male	2007	Matched	Yes	Yes	992.548	MPG_Devil7531415,MPG_Devil7531415,3999STDY6437809
60H	'Unknown	Mt William	Male	2008	Unmatched	Yes	No	2019.65	3999STDY6399934
61H2	'982009104809064	Forestier	Male	2008	Matched	Yes	Yes	2187.24	MPG_Devil7531420,MPG_Devil7531420,3999STDY6352655
62H	'982009104877259	Forestier	Male	2008	Unmatched	Yes	No	1527.69	3999STDY6399935
63H1	'982009104248590	Forestier	Male	2008	Matched	Yes	Yes	1748.68	MPG_Devil7531424,MPG_Devil7531424,3999STDY6352659
64H1	'982009104836888	Forestier	Male	2008	Matched	Yes	Yes	1656.31	MPG_Devil7531426,MPG_Devil7531426,3999STDY6352661
65H1	'982009104811311	Forestier	Male	2008	Unmatched	Yes	Yes	1817.65	MPG_Devil7531428,MPG_Devil7531428,3999STDY6352663
66H	'982009105171583	Forestier	Male	2008	Matched	Yes	Yes	1975.81	MPG_Devil7531435,MPG_Devil7531435,3999STDY6352670
67H1	'982009104869228	Forestier	Female	2008	Matched	Yes	Yes	1783.7	MPG_Devil7531437,MPG_Devil7531437,3999STDY6352672
68H1	'982009104839923	Forestier	Male	2008	Matched	Yes	Yes	1182.65	MPG_Devil7531439,MPG_Devil7531439,3999STDY6352674
69H	'982009104350352	Forestier	Male	2008	Unmatched	Yes	No	1059	3999STDY6399936
70H1	'982009104810296	Forestier	Female	2008	Matched	Yes	Yes	1233.5	MPG_Devil7531441,MPG_Devil7531441,3999STDY6352677
71H	'982009100799027	Forestier	Female	2008	Matched	Yes	Yes	1336.08	MPG_Devil7531445,MPG_Devil7531445,3999STDY6352681
72H1	'982009104834357	Forestier	Male	2008	Matched	Yes	Yes	1013.89	MPG_Devil7531447,MPG_Devil7531447,3999STDY6352683
74H	'Unknown	Woolnorth	Female	Unknown	Unmatched	Yes	No	739.227	3999STDY6399938
75H4	'982009100754517	Forestier	Male	2007	Matched	Yes	Yes	1058.5	MPG_Devil7531449,MPG_Devil7531449,3999STDY6352685
76H1	'982009100303073	Forestier	Male	2007	Matched	Yes	Yes	1261.9	MPG_Devil7531451,MPG_Devil7531451,3999STDY6352687
77H1a	'982009104849679	Forestier	Male	2010	Matched	Yes	Yes	1682.95	MPG_Devil7531453,MPG_Devil7531453,3999STDY6352689
78Ha	'982009104925238	Forestier	Female	2010	Matched	Yes	Yes	1480.63	MPG_Devil7531455,MPG_Devil7531455,3999STDY6352691
79Ha	'982009104840088	Forestier	Male	2010	Matched	Yes	Yes	1447.18	MPG_Devil7531457,MPG_Devil7531457,3999STDY6352693
80H	'982009104789723	Forestier	Male	2010	Matched	Yes	Yes	1724.58	MPG_Devil7531460,MPG_Devil7531460,3999STDY6352696
81H	'982009105195643	Forestier	Male	2010	Matched	Yes	Yes	1311.59	MPG_Devil7531462,MPG_Devil7531462,3999STDY6352698
82H	'Unknown	Magra	Female	2008	Matched	Yes	Yes	1558.61	MPG_Devil7531464,MPG_Devil7531464,3999STDY6352700
83H	'Unknown	Copping	Female	2008	Matched	Yes	Yes	1842.83	MPG_Devil7531466,MPG_Devil7531466,3999STDY6352702
84H	'Unknown	Lovely Banks	Female	2006	Matched	Yes	Yes	1500.76	MPG_Devil7531468,MPG_Devil7531468,3999STDY6352704
88H	'Unknown	Freycinet	Male	2007	Matched	Yes	No	4449.83	3999STDY6383521
89H	'Unknown	Forestier	Male	2010	Unmatched	Yes	Yes	2738.75	MPG_Devil7531469,MPG_Devil7531469,3999STDY6352708
91H	'Unknown	Captive	Female	2006	Unmatched	Yes	No	2457.5	3999STDY6383600
93H1	'982009104234739	Forestier	Male	2010	Matched	Yes	Yes	1488.17	MPG_Devil7531472,MPG_Devil7531472,3999STDY6352712
94H1	'982009104876128	Forestier	Male	2010	Matched	Yes	Yes	1368.54	MPG_Devil7531474,MPG_Devil7531474,3999STDY6352714
95H	'Unknown	Geeveston	Male	2009	Matched	Yes	No	3095.65	3999STDY6383523
97H1	'No microchip	Taranna Wildlife Park	Female	2010	Unmatched	Yes	Yes	2205.61	MPG_Devil7531476,MPG_Devil7531476,3999STDY6352716
98H	'982009105169257	Forestier	Male	2010	Matched	Yes	Yes	1114.57	MPG_Devil7531478,MPG_Devil7531478,3999STDY6352718
99H	'982009104879401	Forestier	Male	2010	Matched	Yes	Yes	1217.2	MPG_Devil7531480,MPG_Devil7531480,3999STDY6352720
100H	'982009104925396	Forestier	Male	2010	Matched	Yes	Yes	1409.67	MPG_Devil7551400,MPG_Devil7551400,3999STDY6362397
101H	'MTP000000101673	Buckland	Female	2010	Matched (MIPs Only)	No	Yes	N/A	MPG_Devil7551403,MPG_Devil7551403
102H	'982009106034997	Buckland	Male	2010	Matched (MIPs Only)	No	Yes	N/A	MPG_Devil7551406,MPG_Devil7551406
103H	'982009106180012	West Pencil Pine	Male	2010	Matched	Yes	Yes	2126.03	MPG_Devil7551603,MPG_Devil7551603,3999STDY6756785
104H	'982009105179063	West Pencil Pine	Female	2010	Matched	Yes	Yes	3013.4	MPG_Devil7551604,MPG_Devil7551604,3999STDY6756786
105H	'982009105161869	West Pencil Pine	Female	2010	Matched	Yes	Yes	909.902	MPG_Devil7551605,MPG_Devil7551605,3999STDY6756787
106H1	'0006444E9C	Mole Creek (captive)	Female	2010	Matched	Yes	Yes	2045.74	MPG_Devil7551413,MPG_Devil7551413,3999STDY6362410
107H1	'982009104864698	Forestier	Female	2010	Matched	Yes	Yes	2690.33	MPG_Devil7551415,MPG_Devil7551415,3999STDY6362412
108H	'982009106165902	Narawntapu	Female	2010	Matched (MIPs Only)	No	Yes	N/A	MPG_Devil7551417,MPG_Devil7551417
109H	'982009104878613	Forestier	Female	2010	Matched	Yes	Yes	1376.04	MPG_Devil7551419,MPG_Devil7551419,3999STDY6362416
110H	'982009106029841	Latrobe	Male	2010	Matched	Yes	Yes	4257.29	MPG_Devil7551421,MPG_Devil7551421,3999STDY6362418
111H	'982009104919715	Forestier	Male	2010	Matched (MIPs Only)	No	Yes	N/A	MPG_Devil7551423,MPG_Devil7551423
112H	'982009104928455	Forestier	Male	2010	Matched	Yes	Yes	1504.07	MPG_Devil7551425,MPG_Devil7551425,3999STDY6362422
113H	'982009104874627	Forestier	Female	2010	Matched	Yes	Yes	1420.44	MPG_Devil7551427,MPG_Devil7551427,3999STDY6362424
115H1	'982009104960576	Forestier	Female	2010	Matched	Yes	Yes	1984.08	MPG_Devil7551429,MPG_Devil7551429,3999STDY6362428
116H	'982009104350416	Narawntapu	Female	2010	Unmatched	Yes	No	942.788	3999STDY6399939
117H	'982009104883696	Narawntapu	Male	2010	Matched	Yes	Yes	3176.56	MPG_Devil7551431,MPG_Devil7551431,3999STDY6362430
118H	'982009106039114	Narawntapu	Male	2010	Matched	Yes	Yes	1507.86	MPG_Devil7551433,MPG_Devil7551433,3999STDY6362432
119H	'982009105380276	Narawntapu	Male	2010	Matched	Yes	Yes	3711.34	MPG_Devil7551435,MPG_Devil7551435,3999STDY6362434
120Ha	'982009104255241	West Pencil Pine	Male	2010	Matched (MIPs Only)	No	Yes	N/A	MPG_Devil7551606,MPG_Devil7551606
121H	'982009105146482	West Pencil Pine	Female	2010	Matched	Yes	No	3949.21	3999STDY6383526
122H1	'982009104325244	West Pencil Pine	Female	2010	Matched	Yes	Yes	3092.83	MPG_Devil7551439,MPG_Devil7551439,3999STDY6362440
123H	'Unknown	Woolnorth	Male	2010	Unmatched	Yes	No	2988.25	3999STDY6383527
124H	'Unknown	Granville Harbour	Male	2010	Unmatched	Yes	No	1372.21	3999STDY6383528
125H	'Unknown	Captive	Female	2010	Unmatched	Yes	No	2471.19	3999STDY6383529
126H	'Unknown	Temma	Female	2010	Unmatched	Yes	No	1539.43	3999STDY6383530
127H	'982009105139081	West Pencil Pine	Male	2010	Matched	Yes	Yes	2187.97	MPG_Devil7551441,MPG_Devil7551441,3999STDY6362442
128H	'982009104888854	West Pencil Pine	Female	2010	Matched	Yes	Yes	1234.88	MPG_Devil7551444,MPG_Devil7551444,3999STDY6362445
130H	'Unknown	Captive	Male	2006	Unmatched	Yes	No	2731.47	3999STDY6399941
131H	'Unknown	Copenhagen Zoo (captive)	Female	2011	Matched (MIPs Only)	No	Yes	N/A	MPG_Devil7551446,MPG_Devil7551446
132H	'982000123133145	Bronte Park	Male	2011	Matched	Yes	Yes	1857.13	MPG_Devil7551448,MPG_Devil7551448,3999STDY6362449
133H	'982000123208174	Bronte Park	Female	2011	Unmatched	Yes	Yes	1348.8	MPG_Devil7551450,MPG_Devil7551450,3999STDY6362451
134H	'982000123128645	Bronte Park	Male	2011	Matched	Yes	Yes	1207.36	MPG_Devil7551458,MPG_Devil7551458,3999STDY6362459
135H	'982000123216973	Bronte Park	Female	2011	Matched	Yes	Yes	1724.5	MPG_Devil7551466,MPG_Devil7551466,3999STDY6362467
137H	'Unknown	Captive	Male	2012	Unmatched	Yes	No	6192.57	3999STDY6399942
138H	'Unknown	Captive	Female	2012	Unmatched	Yes	Yes	2936.01	MPG_Devil7551468,MPG_Devil7551468,3999STDY6362469
139H	'982009104751722	Waratah	Female	2011	Matched	Yes	No	2182.76	3999STDY6264761
140H	'982009106610951	Cradle Mountain (captive)	Male	2013	Matched	Yes	No	1355.2	3999STDY6264763
141H	'985154000001169	Cradle Mountain (captive)	Female	2013	Matched	Yes	No	1108.12	3999STDY6383551
142H	'982009106583665	Cradle Mountain (captive)	Male	2013	Matched	Yes	No	1530.06	3999STDY6264767
143H	'982009105111670	West Pencil Pine	Female	2011	Matched	Yes	No	1902.23	3999STDY6383552
144H	'982009104904089	West Pencil Pine	Female	2012	Matched	Yes	No	2594.29	3999STDY6264771
145H	'982009104881692	West Pencil Pine	Female	2011	Matched	Yes	No	2978.98	3999STDY6264773
146H	'982009106179620	West Pencil Pine	Female	2012	Matched	Yes	No	2883.67	3999STDY6264775
147H	'982009104240273	West Pencil Pine	Female	2012	Matched	Yes	No	2492.7	3999STDY6264777
148H	'982009106089731	West Pencil Pine	Female	2012	Matched	Yes	No	2699	3999STDY6264779
149H	'982009105953323	West Pencil Pine	Female	2012	Matched	Yes	No	2880.68	3999STDY6264781
150H	'982009104796184	West Pencil Pine	Female	2011	Unmatched	Yes	No	1597.36	3999STDY6264783
151H	'982009106029805	West Pencil Pine	Female	2011	Unmatched	Yes	No	1584.33	3999STDY6264785
152H	'982009106093221	West Pencil Pine	Male	2012	Matched	Yes	No	1493.89	3999STDY6264787
[truncated: 922 more rows]
