# Supplementary material for: Evolution and lineage dynamics of a transmissible cancer in Tasmanian devils
Source: PLoS Biol. 2020 Nov 24;18(11):e3000926. doi: 10.1371/journal.pbio.3000926 (PMC7685465; doi:10.1371/journal.pbio.3000926)
Supplement: S12 Table — Equivalence between genome coordinates used in this study and those in Tasmanian devil reference genome Devil7.1+MT (http://www.ensembl.org/Sarcophilus_harrisii/Info/Index). (XLSX) [file pbio.3000926.s024.xlsx]

## Sheet: Table_S12
ENSEMBL ID	TCG ID	Chromosome Position	Genome Position
GL834412.1	Chr1_supercontig_000000000	1-2180112	1-2180112
GL834413.1	Chr1_supercontig_000000001	2180113-2553658	2180113-2553658
GL834414.1	Chr1_supercontig_000000002	2553659-3628951	2553659-3628951
GL834415.1	Chr1_supercontig_000000003	3628952-3803807	3628952-3803807
GL834416.1	Chr1_supercontig_000000004	3803808-4621540	3803808-4621540
GL834417.1	Chr1_supercontig_000000005	4621541-8291235	4621541-8291235
GL834418.1	Chr1_supercontig_000000006	8291236-9409125	8291236-9409125
GL834419.1	Chr1_supercontig_000000007	9409126-11455135	9409126-11455135
GL834420.1	Chr1_supercontig_000000008	11455136-12069840	11455136-12069840
GL834421.1	Chr1_supercontig_000000009	12069841-12320201	12069841-12320201
GL834422.1	Chr1_supercontig_000000010	12320202-13451494	12320202-13451494
GL834423.1	Chr1_supercontig_000000011	13451495-16785533	13451495-16785533
GL834424.1	Chr1_supercontig_000000012	16785534-18924888	16785534-18924888
GL834425.1	Chr1_supercontig_000000013	18924889-19519869	18924889-19519869
GL834426.1	Chr1_supercontig_000000014	19519870-20142921	19519870-20142921
GL834427.1	Chr1_supercontig_000000015	20142922-22248263	20142922-22248263
GL834428.1	Chr1_supercontig_000000016	22248264-23469743	22248264-23469743
GL834429.1	Chr1_supercontig_000000017	23469744-24531115	23469744-24531115
GL834430.1	Chr1_supercontig_000000018	24531116-25012510	24531116-25012510
GL834431.1	Chr1_supercontig_000000019	25012511-25292461	25012511-25292461
GL834432.1	Chr1_supercontig_000000020	25292462-25628393	25292462-25628393
GL834433.1	Chr1_supercontig_000000021	25628394-25812798	25628394-25812798
GL834434.1	Chr1_supercontig_000000022	25812799-26500680	25812799-26500680
GL834435.1	Chr1_supercontig_000000023	26500681-26688709	26500681-26688709
GL834436.1	Chr1_supercontig_000000024	26688710-30229242	26688710-30229242
GL834437.1	Chr1_supercontig_000000025	30229243-30559397	30229243-30559397
GL834438.1	Chr1_supercontig_000000026	30559398-34311546	30559398-34311546
GL834439.1	Chr1_supercontig_000000027	34311547-34757384	34311547-34757384
GL834440.1	Chr1_supercontig_000000028	34757385-35987428	34757385-35987428
GL834441.1	Chr1_supercontig_000000029	35987429-37594416	35987429-37594416
GL834442.1	Chr1_supercontig_000000030	37594417-38258611	37594417-38258611
GL834443.1	Chr1_supercontig_000000031	38258612-38669318	38258612-38669318
GL834444.1	Chr1_supercontig_000000032	38669319-39311334	38669319-39311334
GL834445.1	Chr1_supercontig_000000033	39311335-42917031	39311335-42917031
GL834446.1	Chr1_supercontig_000000034	42917032-45582241	42917032-45582241
GL834447.1	Chr1_supercontig_000000035	45582242-47082899	45582242-47082899
GL834448.1	Chr1_supercontig_000000036	47082900-47902958	47082900-47902958
GL834449.1	Chr1_supercontig_000000037	47902959-48364359	47902959-48364359
GL834450.1	Chr1_supercontig_000000038	48364360-50546460	48364360-50546460
GL834451.1	Chr1_supercontig_000000039	50546461-55108954	50546461-55108954
GL834452.1	Chr1_supercontig_000000040	55108955-59515323	55108955-59515323
GL834453.1	Chr1_supercontig_000000041	59515324-64203760	59515324-64203760
GL834454.1	Chr1_supercontig_000000042	64203761-65863043	64203761-65863043
GL834455.1	Chr1_supercontig_000000043	65863044-66588704	65863044-66588704
GL834456.1	Chr1_supercontig_000000044	66588705-66629793	66588705-66629793
GL834457.1	Chr1_supercontig_000000045	66629794-67591770	66629794-67591770
GL834458.1	Chr1_supercontig_000000046	67591771-68839882	67591771-68839882
GL834459.1	Chr1_supercontig_000000047	68839883-70340628	68839883-70340628
GL834460.1	Chr1_supercontig_000000048	70340629-71937526	70340629-71937526
GL834461.1	Chr1_supercontig_000000049	71937527-75004205	71937527-75004205
GL834462.1	Chr1_supercontig_000000050	75004206-76238945	75004206-76238945
GL834463.1	Chr1_supercontig_000000051	76238946-80516880	76238946-80516880
GL834464.1	Chr1_supercontig_000000052	80516881-84963729	80516881-84963729
GL834465.1	Chr1_supercontig_000000053	84963730-89501698	84963730-89501698
GL834466.1	Chr1_supercontig_000000054	89501699-94266880	89501699-94266880
GL834467.1	Chr1_supercontig_000000055	94266881-95097079	94266881-95097079
GL834468.1	Chr1_supercontig_000000056	95097080-95407802	95097080-95407802
GL834469.1	Chr1_supercontig_000000057	95407803-97798761	95407803-97798761
GL834470.1	Chr1_supercontig_000000058	97798762-97852146	97798762-97852146
GL834471.1	Chr1_supercontig_000000059	97852147-98417764	97852147-98417764
GL834472.1	Chr1_supercontig_000000060	98417765-102204725	98417765-102204725
GL834473.1	Chr1_supercontig_000000061	102204726-102326825	102204726-102326825
GL834474.1	Chr1_supercontig_000000062	102326826-104375501	102326826-104375501
GL834475.1	Chr1_supercontig_000000063	104375502-105878330	104375502-105878330
GL834476.1	Chr1_supercontig_000000064	105878331-106231955	105878331-106231955
GL834477.1	Chr1_supercontig_000000065	106231956-110213459	106231956-110213459
GL834478.1	Chr1_supercontig_000000066	110213460-110307991	110213460-110307991
GL834479.1	Chr1_supercontig_000000067	110307992-110342036	110307992-110342036
GL834480.1	Chr1_supercontig_000000068	110342037-113488217	110342037-113488217
GL834481.1	Chr1_supercontig_000000069	113488218-114339868	113488218-114339868
GL834482.1	Chr1_supercontig_000000070	114339869-117108086	114339869-117108086
GL834483.1	Chr1_supercontig_000000071	117108087-119492305	117108087-119492305
GL834484.1	Chr1_supercontig_000000072	119492306-123331738	119492306-123331738
GL834485.1	Chr1_supercontig_000000073	123331739-124621651	123331739-124621651
GL834486.1	Chr1_supercontig_000000074	124621652-125468239	124621652-125468239
GL834487.1	Chr1_supercontig_000000075	125468240-127598028	125468240-127598028
GL834488.1	Chr1_supercontig_000000076	127598029-131888911	127598029-131888911
GL834489.1	Chr1_supercontig_000000077	131888912-133729643	131888912-133729643
GL834490.1	Chr1_supercontig_000000078	133729644-136867537	133729644-136867537
GL834491.1	Chr1_supercontig_000000079	136867538-137995884	136867538-137995884
GL834492.1	Chr1_supercontig_000000080	137995885-138177221	137995885-138177221
GL834493.1	Chr1_supercontig_000000081	138177222-139444354	138177222-139444354
GL834494.1	Chr1_supercontig_000000082	139444355-139656695	139444355-139656695
GL834495.1	Chr1_supercontig_000000083	139656696-140384122	139656696-140384122
GL834496.1	Chr1_supercontig_000000084	140384123-142699998	140384123-142699998
GL834497.1	Chr1_supercontig_000000085	142699999-142702600	142699999-142702600
GL834498.1	Chr1_supercontig_000000086	142702601-144092464	142702601-144092464
GL834499.1	Chr1_supercontig_000000087	144092465-144177273	144092465-144177273
GL834500.1	Chr1_supercontig_000000088	144177274-145701848	144177274-145701848
GL834501.1	Chr1_supercontig_000000089	145701849-148339192	145701849-148339192
GL834502.1	Chr1_supercontig_000000090	148339193-152597494	148339193-152597494
GL834503.1	Chr1_supercontig_000000091	152597495-153077104	152597495-153077104
GL834504.1	Chr1_supercontig_000000092	153077105-153087258	153077105-153087258
GL834505.1	Chr1_supercontig_000000093	153087259-153911848	153087259-153911848
GL834506.1	Chr1_supercontig_000000094	153911849-156795305	153911849-156795305
GL834507.1	Chr1_supercontig_000000095	156795306-161692253	156795306-161692253
GL834508.1	Chr1_supercontig_000000096	161692254-164471349	161692254-164471349
GL834509.1	Chr1_supercontig_000000097	164471350-164931537	164471350-164931537
GL834510.1	Chr1_supercontig_000000098	164931538-165375225	164931538-165375225
GL834511.1	Chr1_supercontig_000000099	165375226-168274749	165375226-168274749
GL834512.1	Chr1_supercontig_000000100	168274750-169521777	168274750-169521777
GL834513.1	Chr1_supercontig_000000101	169521778-171422683	169521778-171422683
GL834514.1	Chr1_supercontig_000000102	171422684-173862875	171422684-173862875
GL834515.1	Chr1_supercontig_000000103	173862876-174807765	173862876-174807765
GL834516.1	Chr1_supercontig_000000104	174807766-176767489	174807766-176767489
GL834517.1	Chr1_supercontig_000000105	176767490-176793670	176767490-176793670
GL834518.1	Chr1_supercontig_000000106	176793671-176891890	176793671-176891890
GL834519.1	Chr1_supercontig_000000107	176891891-177720067	176891891-177720067
GL834520.1	Chr1_supercontig_000000108	177720068-177864897	177720068-177864897
GL834521.1	Chr1_supercontig_000000109	177864898-179880740	177864898-179880740
GL834522.1	Chr1_supercontig_000000110	179880741-180376714	179880741-180376714
GL834523.1	Chr1_supercontig_000000111	180376715-181122432	180376715-181122432
GL834524.1	Chr1_supercontig_000000112	181122433-182063393	181122433-182063393
GL834525.1	Chr1_supercontig_000000113	182063394-182315151	182063394-182315151
GL834526.1	Chr1_supercontig_000000114	182315152-182927186	182315152-182927186
GL834527.1	Chr1_supercontig_000000115	182927187-185526746	182927187-185526746
GL834528.1	Chr1_supercontig_000000116	185526747-187933228	185526747-187933228
GL834529.1	Chr1_supercontig_000000117	187933229-189177123	187933229-189177123
GL834530.1	Chr1_supercontig_000000118	189177124-190147099	189177124-190147099
GL834531.1	Chr1_supercontig_000000119	190147100-192021905	190147100-192021905
GL834532.1	Chr1_supercontig_000000120	192021906-192512121	192021906-192512121
GL834533.1	Chr1_supercontig_000000121	192512122-193148903	192512122-193148903
GL834534.1	Chr1_supercontig_000000122	193148904-193426859	193148904-193426859
GL834535.1	Chr1_supercontig_000000123	193426860-193934628	193426860-193934628
GL834536.1	Chr1_supercontig_000000124	193934629-195045986	193934629-195045986
GL834537.1	Chr1_supercontig_000000125	195045987-195417443	195045987-195417443
GL834538.1	Chr1_supercontig_000000126	195417444-196717656	195417444-196717656
GL834539.1	Chr1_supercontig_000000127	196717657-199646250	196717657-199646250
GL834540.1	Chr1_supercontig_000000128	199646251-204167028	199646251-204167028
GL834541.1	Chr1_supercontig_000000129	204167029-209293067	204167029-209293067
GL834542.1	Chr1_supercontig_000000130	209293068-213175431	209293068-213175431
GL834543.1	Chr1_supercontig_000000131	213175432-214898624	213175432-214898624
GL834544.1	Chr1_supercontig_000000132	214898625-215119570	214898625-215119570
GL834545.1	Chr1_supercontig_000000133	215119571-215928096	215119571-215928096
GL834546.1	Chr1_supercontig_000000134	215928097-217895545	215928097-217895545
GL834547.1	Chr1_supercontig_000000135	217895546-218874075	217895546-218874075
GL834548.1	Chr1_supercontig_000000136	218874076-219173334	218874076-219173334
GL834549.1	Chr1_supercontig_000000137	219173335-220319090	219173335-220319090
GL834550.1	Chr1_supercontig_000000138	220319091-220358599	220319091-220358599
GL834551.1	Chr1_supercontig_000000139	220358600-221432843	220358600-221432843
GL834552.1	Chr1_supercontig_000000140	221432844-221870539	221432844-221870539
GL834553.1	Chr1_supercontig_000000141	221870540-222045034	221870540-222045034
GL834554.1	Chr1_supercontig_000000142	222045035-223393774	222045035-223393774
GL834555.1	Chr1_supercontig_000000143	223393775-223633947	223393775-223633947
GL834556.1	Chr1_supercontig_000000144	223633948-223824043	223633948-223824043
GL834557.1	Chr1_supercontig_000000145	223824044-223943468	223824044-223943468
GL834558.1	Chr1_supercontig_000000146	223943469-224153702	223943469-224153702
GL834559.1	Chr1_supercontig_000000147	224153703-224539502	224153703-224539502
GL834560.1	Chr1_supercontig_000000148	224539503-224732918	224539503-224732918
GL834561.1	Chr1_supercontig_000000149	224732919-225017175	224732919-225017175
GL834562.1	Chr1_supercontig_000000150	225017176-225138920	225017176-225138920
GL834563.1	Chr1_supercontig_000000151	225138921-225404933	225138921-225404933
GL834564.1	Chr1_supercontig_000000152	225404934-225516762	225404934-225516762
GL834565.1	Chr1_supercontig_000000153	225516763-226595384	225516763-226595384
GL834566.1	Chr1_supercontig_000000154	226595385-227203248	226595385-227203248
GL834567.1	Chr1_supercontig_000000155	227203249-227661267	227203249-227661267
GL834568.1	Chr1_supercontig_000000156	227661268-227958888	227661268-227958888
GL834569.1	Chr1_supercontig_000000157	227958889-228134436	227958889-228134436
GL834570.1	Chr1_supercontig_000000158	228134437-228266610	228134437-228266610
GL834571.1	Chr1_supercontig_000000159	228266611-228363579	228266611-228363579
GL834572.1	Chr1_supercontig_000000160	228363580-228451871	228363580-228451871
GL834573.1	Chr1_supercontig_000000161	228451872-228735165	228451872-228735165
GL834574.1	Chr1_supercontig_000000162	228735166-228892399	228735166-228892399
GL834575.1	Chr1_supercontig_000000163	228892400-229050165	228892400-229050165
GL834576.1	Chr1_supercontig_000000164	229050166-229341649	229050166-229341649
GL834577.1	Chr1_supercontig_000000165	229341650-233436664	229341650-233436664
GL834578.1	Chr1_supercontig_000000166	233436665-233795177	233436665-233795177
GL834579.1	Chr1_supercontig_000000167	233795178-234525897	233795178-234525897
GL834580.1	Chr1_supercontig_000000168	234525898-235897088	234525898-235897088
GL834581.1	Chr1_supercontig_000000169	235897089-235905560	235897089-235905560
GL834582.1	Chr1_supercontig_000000170	235905561-237335921	235905561-237335921
GL834583.1	Chr1_supercontig_000000171	237335922-239888070	237335922-239888070
GL834584.1	Chr1_supercontig_000000172	239888071-240559884	239888071-240559884
GL834585.1	Chr1_supercontig_000000173	240559885-240727264	240559885-240727264
GL834586.1	Chr1_supercontig_000000174	240727265-241152247	240727265-241152247
GL834587.1	Chr1_supercontig_000000175	241152248-242962608	241152248-242962608
GL834588.1	Chr1_supercontig_000000176	242962609-245592769	242962609-245592769
GL834589.1	Chr1_supercontig_000000177	245592770-248468804	245592770-248468804
GL834590.1	Chr1_supercontig_000000178	248468805-248640756	248468805-248640756
GL834591.1	Chr1_supercontig_000000179	248640757-250444456	248640757-250444456
GL834592.1	Chr1_supercontig_000000180	250444457-250765545	250444457-250765545
GL834593.1	Chr1_supercontig_000000181	250765546-252384761	250765546-252384761
GL834594.1	Chr1_supercontig_000000182	252384762-253774510	252384762-253774510
GL834595.1	Chr1_supercontig_000000183	253774511-256054596	253774511-256054596
GL834596.1	Chr1_supercontig_000000184	256054597-257231187	256054597-257231187
GL834597.1	Chr1_supercontig_000000185	257231188-258583456	257231188-258583456
GL834598.1	Chr1_supercontig_000000186	258583457-259118999	258583457-259118999
GL834599.1	Chr1_supercontig_000000187	259119000-259239876	259119000-259239876
GL834600.1	Chr1_supercontig_000000188	259239877-260361815	259239877-260361815
GL834601.1	Chr1_supercontig_000000189	260361816-260807634	260361816-260807634
GL834602.1	Chr1_supercontig_000000190	260807635-261233815	260807635-261233815
GL834603.1	Chr1_supercontig_000000191	261233816-265403014	261233816-265403014
GL834604.1	Chr1_supercontig_000000192	265403015-265580398	265403015-265580398
GL834605.1	Chr1_supercontig_000000193	265580399-267002889	265580399-267002889
GL834606.1	Chr1_supercontig_000000194	267002890-267223980	267002890-267223980
GL834607.1	Chr1_supercontig_000000195	267223981-267386096	267223981-267386096
GL834608.1	Chr1_supercontig_000000196	267386097-269438539	267386097-269438539
GL834609.1	Chr1_supercontig_000000197	269438540-274060589	269438540-274060589
GL834610.1	Chr1_supercontig_000000198	274060590-275307572	274060590-275307572
GL834611.1	Chr1_supercontig_000000199	275307573-275743567	275307573-275743567
GL834612.1	Chr1_supercontig_000000200	275743568-275894655	275743568-275894655
GL834613.1	Chr1_supercontig_000000201	275894656-276304532	275894656-276304532
GL834614.1	Chr1_supercontig_000000202	276304533-277768027	276304533-277768027
GL834615.1	Chr1_supercontig_000000203	277768028-278349744	277768028-278349744
GL834616.1	Chr1_supercontig_000000204	278349745-279018214	278349745-279018214
GL834617.1	Chr1_supercontig_000000205	279018215-280739741	279018215-280739741
GL834618.1	Chr1_supercontig_000000206	280739742-285499377	280739742-285499377
GL834619.1	Chr1_supercontig_000000207	285499378-286673036	285499378-286673036
GL834620.1	Chr1_supercontig_000000208	286673037-288424683	286673037-288424683
GL834621.1	Chr1_supercontig_000000209	288424684-289386392	288424684-289386392
GL834622.1	Chr1_supercontig_000000210	289386393-291013637	289386393-291013637
GL834623.1	Chr1_supercontig_000000211	291013638-291785773	291013638-291785773
GL834624.1	Chr1_supercontig_000000212	291785774-294655896	291785774-294655896
GL834625.1	Chr1_supercontig_000000213	294655897-298649036	294655897-298649036
GL834626.1	Chr1_supercontig_000000214	298649037-299488859	298649037-299488859
GL834627.1	Chr1_supercontig_000000215	299488860-303558906	299488860-303558906
GL834628.1	Chr1_supercontig_000000216	303558907-307410292	303558907-307410292
GL834629.1	Chr1_supercontig_000000217	307410293-309027827	307410293-309027827
GL834630.1	Chr1_supercontig_000000218	309027828-310560616	309027828-310560616
GL834631.1	Chr1_supercontig_000000219	310560617-310738437	310560617-310738437
GL834632.1	Chr1_supercontig_000000220	310738438-311788181	310738438-311788181
GL834633.1	Chr1_supercontig_000000221	311788182-315136108	311788182-315136108
GL834634.1	Chr1_supercontig_000000222	315136109-315577051	315136109-315577051
GL834635.1	Chr1_supercontig_000000223	315577052-319116565	315577052-319116565
GL834636.1	Chr1_supercontig_000000224	319116566-320262557	319116566-320262557
GL834637.1	Chr1_supercontig_000000225	320262558-322900770	320262558-322900770
GL834638.1	Chr1_supercontig_000000226	322900771-323585160	322900771-323585160
GL834639.1	Chr1_supercontig_000000227	323585161-324540492	323585161-324540492
GL834640.1	Chr1_supercontig_000000228	324540493-326888592	324540493-326888592
GL834641.1	Chr1_supercontig_000000229	326888593-327160532	326888593-327160532
GL834642.1	Chr1_supercontig_000000230	327160533-327209751	327160533-327209751
GL834643.1	Chr1_supercontig_000000231	327209752-329427939	327209752-329427939
GL834644.1	Chr1_supercontig_000000232	329427940-331167701	329427940-331167701
GL834645.1	Chr1_supercontig_000000233	331167702-335738570	331167702-335738570
GL834646.1	Chr1_supercontig_000000234	335738571-340451125	335738571-340451125
GL834647.1	Chr1_supercontig_000000235	340451126-343330312	340451126-343330312
GL834648.1	Chr1_supercontig_000000236	343330313-344982446	343330313-344982446
GL834649.1	Chr1_supercontig_000000237	344982447-346107052	344982447-346107052
GL834650.1	Chr1_supercontig_000000238	346107053-348110549	346107053-348110549
GL834651.1	Chr1_supercontig_000000239	348110550-352817612	348110550-352817612
GL834652.1	Chr1_supercontig_000000240	352817613-357135303	352817613-357135303
GL834653.1	Chr1_supercontig_000000241	357135304-357596941	357135304-357596941
GL834654.1	Chr1_supercontig_000000242	357596942-361291038	357596942-361291038
GL834655.1	Chr1_supercontig_000000243	361291039-361406630	361291039-361406630
GL834656.1	Chr1_supercontig_000000244	361406631-362913401	361406631-362913401
GL834657.1	Chr1_supercontig_000000245	362913402-363488444	362913402-363488444
GL834658.1	Chr1_supercontig_000000246	363488445-364627916	363488445-364627916
GL834659.1	Chr1_supercontig_000000247	364627917-368258878	364627917-368258878
GL834660.1	Chr1_supercontig_000000248	368258879-369230704	368258879-369230704
GL834661.1	Chr1_supercontig_000000249	369230705-369972638	369230705-369972638
GL834662.1	Chr1_supercontig_000000250	369972639-373618143	369972639-373618143
GL834663.1	Chr1_supercontig_000000251	373618144-374355826	373618144-374355826
GL834664.1	Chr1_supercontig_000000252	374355827-375156611	374355827-375156611
GL834665.1	Chr1_supercontig_000000253	375156612-377412088	375156612-377412088
GL834666.1	Chr1_supercontig_000000254	377412089-378878814	377412089-378878814
GL834667.1	Chr1_supercontig_000000255	378878815-381684442	378878815-381684442
GL834668.1	Chr1_supercontig_000000256	381684443-386063904	381684443-386063904
GL834669.1	Chr1_supercontig_000000257	386063905-386918547	386063905-386918547
GL834670.1	Chr1_supercontig_000000258	386918548-389846528	386918548-389846528
GL834671.1	Chr1_supercontig_000000259	389846529-393647211	389846529-393647211
GL834672.1	Chr1_supercontig_000000260	393647212-394048914	393647212-394048914
GL834673.1	Chr1_supercontig_000000261	394048915-394293315	394048915-394293315
GL834674.1	Chr1_supercontig_000000262	394293316-395845897	394293316-395845897
GL834675.1	Chr1_supercontig_000000263	395845898-396090459	395845898-396090459
GL834676.1	Chr1_supercontig_000000264	396090460-399060928	396090460-399060928
GL834677.1	Chr1_supercontig_000000265	399060929-400461983	399060929-400461983
GL834678.1	Chr1_supercontig_000000266	400461984-400700389	400461984-400700389
GL834679.1	Chr1_supercontig_000000267	400700390-401062405	400700390-401062405
GL834680.1	Chr1_supercontig_000000268	401062406-402902907	401062406-402902907
GL834681.1	Chr1_supercontig_000000269	402902908-403179620	402902908-403179620
GL834682.1	Chr1_supercontig_000000270	403179621-404582828	403179621-404582828
GL834683.1	Chr1_supercontig_000000271	404582829-406175255	404582829-406175255
GL834684.1	Chr1_supercontig_000000272	406175256-408332558	406175256-408332558
GL834685.1	Chr1_supercontig_000000273	408332559-408991243	408332559-408991243
GL834686.1	Chr1_supercontig_000000274	408991244-410115865	408991244-410115865
GL834687.1	Chr1_supercontig_000000275	410115866-410509415	410115866-410509415
GL834688.1	Chr1_supercontig_000000276	410509416-413904645	410509416-413904645
GL834689.1	Chr1_supercontig_000000277	413904646-415072409	413904646-415072409
GL834690.1	Chr1_supercontig_000000278	415072410-416543557	415072410-416543557
GL834691.1	Chr1_supercontig_000000279	416543558-416817047	416543558-416817047
GL834692.1	Chr1_supercontig_000000280	416817048-417681670	416817048-417681670
GL834693.1	Chr1_supercontig_000000281	417681671-419443440	417681671-419443440
GL834694.1	Chr1_supercontig_000000282	419443441-422104819	419443441-422104819
GL834695.1	Chr1_supercontig_000000283	422104820-422256231	422104820-422256231
GL834696.1	Chr1_supercontig_000000284	422256232-425885512	422256232-425885512
GL834697.1	Chr1_supercontig_000000285	425885513-426236886	425885513-426236886
GL834698.1	Chr1_supercontig_000000286	426236887-426238401	426236887-426238401
GL834699.1	Chr1_supercontig_000000287	426238402-428798845	426238402-428798845
GL834700.1	Chr1_supercontig_000000288	428798846-430068669	428798846-430068669
GL834701.1	Chr1_supercontig_000000289	430068670-432020033	430068670-432020033
GL834702.1	Chr1_supercontig_000000290	432020034-433006583	432020034-433006583
GL834703.1	Chr1_supercontig_000000291	433006584-434108094	433006584-434108094
GL834704.1	Chr1_supercontig_000000292	434108095-434917695	434108095-434917695
GL834705.1	Chr1_supercontig_000000293	434917696-435446379	434917696-435446379
GL834706.1	Chr1_supercontig_000000294	435446380-437467971	435446380-437467971
GL834707.1	Chr1_supercontig_000000295	437467972-437624885	437467972-437624885
GL834708.1	Chr1_supercontig_000000296	437624886-439048441	437624886-439048441
GL834709.1	Chr1_supercontig_000000297	439048442-442930377	439048442-442930377
GL834710.1	Chr1_supercontig_000000298	442930378-447626176	442930378-447626176
GL834711.1	Chr1_supercontig_000000299	447626177-447656494	447626177-447656494
GL834712.1	Chr1_supercontig_000000300	447656495-447658724	447656495-447658724
GL834713.1	Chr1_supercontig_000000301	447658725-451905533	447658725-451905533
GL834714.1	Chr1_supercontig_000000302	451905534-452417411	451905534-452417411
GL834715.1	Chr1_supercontig_000000303	452417412-456081093	452417412-456081093
GL834716.1	Chr1_supercontig_000000304	456081094-457342179	456081094-457342179
GL834717.1	Chr1_supercontig_000000305	457342180-460506289	457342180-460506289
GL834718.1	Chr1_supercontig_000000306	460506290-461339769	460506290-461339769
GL834719.1	Chr1_supercontig_000000307	461339770-464246806	461339770-464246806
GL834720.1	Chr1_supercontig_000000308	464246807-464470690	464246807-464470690
GL834721.1	Chr1_supercontig_000000309	464470691-468234195	464470691-468234195
GL834722.1	Chr1_supercontig_000000310	468234196-473052288	468234196-473052288
GL834723.1	Chr1_supercontig_000000311	473052289-476994784	473052289-476994784
GL834724.1	Chr1_supercontig_000000312	476994785-480034620	476994785-480034620
GL834725.1	Chr1_supercontig_000000313	480034621-480493426	480034621-480493426
GL834726.1	Chr1_supercontig_000000314	480493427-481815324	480493427-481815324
GL834727.1	Chr1_supercontig_000000315	481815325-483427797	481815325-483427797
GL834728.1	Chr1_supercontig_000000316	483427798-486089089	483427798-486089089
GL834729.1	Chr1_supercontig_000000317	486089090-487282904	486089090-487282904
GL834730.1	Chr1_supercontig_000000318	487282905-488606204	487282905-488606204
GL834731.1	Chr1_supercontig_000000319	488606205-490270884	488606205-490270884
GL834732.1	Chr1_supercontig_000000320	490270885-494837891	490270885-494837891
GL834733.1	Chr1_supercontig_000000321	494837892-495955961	494837892-495955961
GL834734.1	Chr1_supercontig_000000322	495955962-497546365	495955962-497546365
GL834735.1	Chr1_supercontig_000000323	497546366-497722486	497546366-497722486
GL834736.1	Chr1_supercontig_000000324	497722487-500322381	497722487-500322381
GL834737.1	Chr1_supercontig_000000325	500322382-500881736	500322382-500881736
GL834738.1	Chr1_supercontig_000000326	500881737-500993516	500881737-500993516
GL834739.1	Chr1_supercontig_000000327	500993517-503240563	500993517-503240563
GL834740.1	Chr1_supercontig_000000328	503240564-504972971	503240564-504972971
GL834741.1	Chr1_supercontig_000000329	504972972-505013740	504972972-505013740
GL834742.1	Chr1_supercontig_000000330	505013741-505854649	505013741-505854649
GL834743.1	Chr1_supercontig_000000331	505854650-510748633	505854650-510748633
GL834744.1	Chr1_supercontig_000000332	510748634-512999179	510748634-512999179
GL834745.1	Chr1_supercontig_000000333	512999180-513119682	512999180-513119682
GL834746.1	Chr1_supercontig_000000334	513119683-515876292	513119683-515876292
GL834747.1	Chr1_supercontig_000000335	515876293-516655773	515876293-516655773
GL834748.1	Chr1_supercontig_000000336	516655774-516872609	516655774-516872609
GL834749.1	Chr1_supercontig_000000337	516872610-520748118	516872610-520748118
GL834750.1	Chr1_supercontig_000000338	520748119-520949262	520748119-520949262
GL834751.1	Chr1_supercontig_000000339	520949263-522211774	520949263-522211774
GL834752.1	Chr1_supercontig_000000340	522211775-522273627	522211775-522273627
GL834753.1	Chr1_supercontig_000000341	522273628-525280293	522273628-525280293
GL834754.1	Chr1_supercontig_000000342	525280294-526997267	525280294-526997267
GL834755.1	Chr1_supercontig_000000343	526997268-527312682	526997268-527312682
GL834756.1	Chr1_supercontig_000000344	527312683-527510598	527312683-527510598
GL834757.1	Chr1_supercontig_000000345	527510599-527579894	527510599-527579894
GL834758.1	Chr1_supercontig_000000346	527579895-528182288	527579895-528182288
GL834759.1	Chr1_supercontig_000000347	528182289-531145768	528182289-531145768
GL834760.1	Chr1_supercontig_000000348	531145769-531376418	531145769-531376418
GL834761.1	Chr1_supercontig_000000349	531376419-532794083	531376419-532794083
GL834762.1	Chr1_supercontig_000000350	532794084-532938419	532794084-532938419
GL834763.1	Chr1_supercontig_000000351	532938420-533725695	532938420-533725695
GL834764.1	Chr1_supercontig_000000352	533725696-534959935	533725696-534959935
GL834765.1	Chr1_supercontig_000000353	534959936-536695897	534959936-536695897
GL834766.1	Chr1_supercontig_000000354	536695898-539685995	536695898-539685995
GL834767.1	Chr1_supercontig_000000355	539685996-540938015	539685996-540938015
GL834768.1	Chr1_supercontig_000000356	540938016-542997536	540938016-542997536
GL834769.1	Chr1_supercontig_000000357	542997537-544936171	542997537-544936171
GL834770.1	Chr1_supercontig_000000358	544936172-547736705	544936172-547736705
GL834771.1	Chr1_supercontig_000000359	547736706-548244149	547736706-548244149
GL834772.1	Chr1_supercontig_000000360	548244150-548496251	548244150-548496251
GL834773.1	Chr1_supercontig_000000361	548496252-548826915	548496252-548826915
GL834774.1	Chr1_supercontig_000000362	548826916-549134954	548826916-549134954
GL834775.1	Chr1_supercontig_000000363	549134955-550124668	549134955-550124668
GL834776.1	Chr1_supercontig_000000364	550124669-550535378	550124669-550535378
GL834777.1	Chr1_supercontig_000000365	550535379-551911281	550535379-551911281
GL834778.1	Chr1_supercontig_000000366	551911282-552254833	551911282-552254833
GL834779.1	Chr1_supercontig_000000367	552254834-553796280	552254834-553796280
GL834780.1	Chr1_supercontig_000000368	553796281-554073963	553796281-554073963
GL834781.1	Chr1_supercontig_000000369	554073964-554348625	554073964-554348625
GL834782.1	Chr1_supercontig_000000370	554348626-556543074	554348626-556543074
GL834783.1	Chr1_supercontig_000000371	556543075-557295526	556543075-557295526
GL834784.1	Chr1_supercontig_000000372	557295527-558530480	557295527-558530480
GL834785.1	Chr1_supercontig_000000373	558530481-560275829	558530481-560275829
GL834786.1	Chr1_supercontig_000000374	560275830-560458666	560275830-560458666
GL834787.1	Chr1_supercontig_000000375	560458667-562788271	560458667-562788271
GL834788.1	Chr1_supercontig_000000376	562788272-564258509	562788272-564258509
GL834789.1	Chr1_supercontig_000000377	564258510-565476948	564258510-565476948
GL834790.1	Chr1_supercontig_000000378	565476949-566689975	565476949-566689975
GL834791.1	Chr1_supercontig_000000379	566689976-567425051	566689976-567425051
GL834792.1	Chr1_supercontig_000000380	567425052-569799228	567425052-569799228
GL834793.1	Chr1_supercontig_000000381	569799229-571327696	569799229-571327696
GL834794.1	Chr1_supercontig_000000382	571327697-573600219	571327697-573600219
GL834795.1	Chr1_supercontig_000000383	573600220-574261179	573600220-574261179
GL834796.1	Chr1_supercontig_000000384	574261180-575703943	574261180-575703943
GL834797.1	Chr1_supercontig_000000385	575703944-576281467	575703944-576281467
GL834798.1	Chr1_supercontig_000000386	576281468-576985842	576281468-576985842
GL834799.1	Chr1_supercontig_000000387	576985843-577737475	576985843-577737475
GL834800.1	Chr1_supercontig_000000388	577737476-577836825	577737476-577836825
GL834801.1	Chr1_supercontig_000000389	577836826-579064214	577836826-579064214
GL834802.1	Chr1_supercontig_000000390	579064215-580178576	579064215-580178576
GL834803.1	Chr1_supercontig_000000391	580178577-580182429	580178577-580182429
GL834804.1	Chr1_supercontig_000000392	580182430-580184048	580182430-580184048
GL834805.1	Chr1_supercontig_000000393	580184049-580186403	580184049-580186403
GL834806.1	Chr1_supercontig_000000394	580186404-580931693	580186404-580931693
GL834807.1	Chr1_supercontig_000000395	580931694-581230678	580931694-581230678
GL834808.1	Chr1_supercontig_000000396	581230679-582166379	581230679-582166379
GL834809.1	Chr1_supercontig_000000397	582166380-582481261	582166380-582481261
GL834810.1	Chr1_supercontig_000000398	582481262-582483498	582481262-582483498
GL834811.1	Chr1_supercontig_000000399	582483499-582779248	582483499-582779248
GL834812.1	Chr1_supercontig_000000400	582779249-583000357	582779249-583000357
GL834813.1	Chr1_supercontig_000000401	583000358-583371457	583000358-583371457
GL834814.1	Chr1_supercontig_000000402	583371458-583392426	583371458-583392426
GL834815.1	Chr1_supercontig_000000403	583392427-583514740	583392427-583514740
GL834816.1	Chr1_supercontig_000000404	583514741-583545583	583514741-583545583
GL834817.1	Chr1_supercontig_000000405	583545584-583580372	583545584-583580372
GL834818.1	Chr1_supercontig_000000406	583580373-583642926	583580373-583642926
GL834819.1	Chr1_supercontig_000000407	583642927-583764055	583642927-583764055
GL834820.1	Chr1_supercontig_000000408	583764056-583911206	583764056-583911206
GL834821.1	Chr1_supercontig_000000409	583911207-584295633	583911207-584295633
GL834822.1	Chr1_supercontig_000000410	584295634-584715563	584295634-584715563
GL834823.1	Chr1_supercontig_000000411	584715564-584803504	584715564-584803504
GL834824.1	Chr1_supercontig_000000412	584803505-584862603	584803505-584862603
GL834825.1	Chr1_supercontig_000000413	584862604-584898424	584862604-584898424
GL834826.1	Chr1_supercontig_000000414	584898425-585184656	584898425-585184656
GL834827.1	Chr1_supercontig_000000415	585184657-585217463	585184657-585217463
GL834828.1	Chr1_supercontig_000000416	585217464-585274036	585217464-585274036
GL834829.1	Chr1_supercontig_000000417	585274037-585347246	585274037-585347246
GL834830.1	Chr1_supercontig_000000418	585347247-585420102	585347247-585420102
GL834831.1	Chr1_supercontig_000000419	585420103-585477431	585420103-585477431
GL834832.1	Chr1_supercontig_000000420	585477432-585614272	585477432-585614272
GL834833.1	Chr1_supercontig_000000421	585614273-585735355	585614273-585735355
GL834834.1	Chr1_supercontig_000000422	585735356-585742898	585735356-585742898
GL834835.1	Chr1_supercontig_000000423	585742899-585833981	585742899-585833981
GL834836.1	Chr1_supercontig_000000424	585833982-585962667	585833982-585962667
GL834837.1	Chr1_supercontig_000000425	585962668-586063059	585962668-586063059
GL834838.1	Chr1_supercontig_000000426	586063060-586199374	586063060-586199374
GL834839.1	Chr1_supercontig_000000427	586199375-586410177	586199375-586410177
GL834840.1	Chr1_supercontig_000000428	586410178-586542884	586410178-586542884
GL834841.1	Chr1_supercontig_000000429	586542885-586574550	586542885-586574550
GL834842.1	Chr1_supercontig_000000430	586574551-586812764	586574551-586812764
GL834843.1	Chr1_supercontig_000000431	586812765-586876530	586812765-586876530
GL834844.1	Chr1_supercontig_000000432	586876531-586989472	586876531-586989472
GL834845.1	Chr1_supercontig_000000433	586989473-587225122	586989473-587225122
GL834846.1	Chr1_supercontig_000000434	587225123-587405631	587225123-587405631
GL834847.1	Chr1_supercontig_000000435	587405632-587455955	587405632-587455955
GL834848.1	Chr1_supercontig_000000436	587455956-587711356	587455956-587711356
GL834849.1	Chr1_supercontig_000000437	587711357-587944678	587711357-587944678
GL834850.1	Chr1_supercontig_000000438	587944679-587998867	587944679-587998867
GL834851.1	Chr1_supercontig_000000439	587998868-588065140	587998868-588065140
GL834852.1	Chr1_supercontig_000000440	588065141-588135161	588065141-588135161
GL834853.1	Chr1_supercontig_000000441	588135162-588392703	588135162-588392703
GL834854.1	Chr1_supercontig_000000442	588392704-588425492	588392704-588425492
GL834855.1	Chr1_supercontig_000000443	588425493-588478772	588425493-588478772
GL834856.1	Chr1_supercontig_000000444	588478773-588533681	588478773-588533681
GL834857.1	Chr1_supercontig_000000445	588533682-588683855	588533682-588683855
GL834858.1	Chr1_supercontig_000000446	588683856-588995445	588683856-588995445
GL834859.1	Chr1_supercontig_000000447	588995446-589108407	588995446-589108407
GL834860.1	Chr1_supercontig_000000448	589108408-589190136	589108408-589190136
GL834861.1	Chr1_supercontig_000000449	589190137-589269313	589190137-589269313
GL834862.1	Chr1_supercontig_000000450	589269314-589381518	589269314-589381518
GL834863.1	Chr1_supercontig_000000451	589381519-589433451	589381519-589433451
GL834864.1	Chr1_supercontig_000000452	589433452-589462381	589433452-589462381
GL834865.1	Chr1_supercontig_000000453	589462382-589478639	589462382-589478639
GL834866.1	Chr1_supercontig_000000454	589478640-589549411	589478640-589549411
GL834867.1	Chr1_supercontig_000000455	589549412-589574308	589549412-589574308
GL834868.1	Chr1_supercontig_000000456	589574309-589622181	589574309-589622181
GL834869.1	Chr1_supercontig_000000457	589622182-589731057	589622182-589731057
GL834870.1	Chr1_supercontig_000000458	589731058-589785649	589731058-589785649
GL834871.1	Chr1_supercontig_000000459	589785650-589846786	589785650-589846786
GL834872.1	Chr1_supercontig_000000460	589846787-589918086	589846787-589918086
GL834873.1	Chr1_supercontig_000000461	589918087-589982970	589918087-589982970
GL834874.1	Chr1_supercontig_000000462	589982971-590135296	589982971-590135296
GL834875.1	Chr1_supercontig_000000463	590135297-590265799	590135297-590265799
GL834876.1	Chr1_supercontig_000000464	590265800-590304341	590265800-590304341
GL834877.1	Chr1_supercontig_000000465	590304342-590392033	590304342-590392033
GL834878.1	Chr1_supercontig_000000466	590392034-590631608	590392034-590631608
GL834879.1	Chr1_supercontig_000000467	590631609-590676419	590631609-590676419
GL834880.1	Chr1_supercontig_000000468	590676420-590968454	590676420-590968454
GL834881.1	Chr1_supercontig_000000469	590968455-591047592	590968455-591047592
GL834882.1	Chr1_supercontig_000000470	591047593-591097470	591047593-591097470
GL834883.1	Chr1_supercontig_000000471	591097471-591161612	591097471-591161612
GL834884.1	Chr1_supercontig_000000472	591161613-591226705	591161613-591226705
GL834885.1	Chr1_supercontig_000000473	591226706-591284932	591226706-591284932
GL834886.1	Chr1_supercontig_000000474	591284933-591522762	591284933-591522762
GL834887.1	Chr1_supercontig_000000475	591522763-591527881	591522763-591527881
GL834888.1	Chr1_supercontig_000000476	591527882-591749240	591527882-591749240
GL834889.1	Chr1_supercontig_000000477	591749241-591785154	591749241-591785154
GL834890.1	Chr1_supercontig_000000478	591785155-591845346	591785155-591845346
GL834891.1	Chr1_supercontig_000000479	591845347-591898346	591845347-591898346
GL834892.1	Chr1_supercontig_000000480	591898347-592029975	591898347-592029975
GL834893.1	Chr1_supercontig_000000481	592029976-592099173	592029976-592099173
GL834894.1	Chr1_supercontig_000000482	592099174-592170736	592099174-592170736
GL834895.1	Chr1_supercontig_000000483	592170737-592547614	592170737-592547614
GL834896.1	Chr1_supercontig_000000484	592547615-592688206	592547615-592688206
GL834897.1	Chr1_supercontig_000000485	592688207-592963279	592688207-592963279
GL834898.1	Chr1_supercontig_000000486	592963280-593008650	592963280-593008650
GL834899.1	Chr1_supercontig_000000487	593008651-593158276	593008651-593158276
GL834900.1	Chr1_supercontig_000000488	593158277-593754742	593158277-593754742
GL834901.1	Chr1_supercontig_000000489	593754743-593852090	593754743-593852090
GL834902.1	Chr1_supercontig_000000490	593852091-593940349	593852091-593940349
GL834903.1	Chr1_supercontig_000000491	593940350-594295789	593940350-594295789
GL834904.1	Chr1_supercontig_000000492	594295790-594338853	594295790-594338853
GL834905.1	Chr1_supercontig_000000493	594338854-594345485	594338854-594345485
GL834906.1	Chr1_supercontig_000000494	594345486-594411480	594345486-594411480
GL834907.1	Chr1_supercontig_000000495	594411481-594499690	594411481-594499690
GL834908.1	Chr1_supercontig_000000496	594499691-594578555	594499691-594578555
GL834909.1	Chr1_supercontig_000000497	594578556-594626747	594578556-594626747
GL834910.1	Chr1_supercontig_000000498	594626748-594734360	594626748-594734360
GL834911.1	Chr1_supercontig_000000499	594734361-594810405	594734361-594810405
GL834912.1	Chr1_supercontig_000000500	594810406-594876760	594810406-594876760
GL834913.1	Chr1_supercontig_000000501	594876761-594956477	594876761-594956477
GL834914.1	Chr1_supercontig_000000502	594956478-595058966	594956478-595058966
GL834915.1	Chr1_supercontig_000000503	595058967-595095599	595058967-595095599
GL834916.1	Chr1_supercontig_000000504	595095600-595099187	595095600-595099187
GL834917.1	Chr1_supercontig_000000505	595099188-595178596	595099188-595178596
GL834918.1	Chr1_supercontig_000000506	595178597-595371508	595178597-595371508
GL834919.1	Chr1_supercontig_000000507	595371509-595441152	595371509-595441152
GL834920.1	Chr1_supercontig_000000508	595441153-595502522	595441153-595502522
GL834921.1	Chr1_supercontig_000000509	595502523-595676884	595502523-595676884
GL834922.1	Chr1_supercontig_000000510	595676885-595761206	595676885-595761206
GL834923.1	Chr1_supercontig_000000511	595761207-595870181	595761207-595870181
GL834924.1	Chr1_supercontig_000000512	595870182-595951797	595870182-595951797
GL834925.1	Chr1_supercontig_000000513	595951798-596116875	595951798-596116875
GL834926.1	Chr1_supercontig_000000514	596116876-596363554	596116876-596363554
GL834927.1	Chr1_supercontig_000000515	596363555-596428011	596363555-596428011
GL834928.1	Chr1_supercontig_000000516	596428012-596462674	596428012-596462674
GL834929.1	Chr1_supercontig_000000517	596462675-596528797	596462675-596528797
GL834930.1	Chr1_supercontig_000000518	596528798-596678586	596528798-596678586
GL834931.1	Chr1_supercontig_000000519	596678587-596768555	596678587-596768555
GL834932.1	Chr1_supercontig_000000520	596768556-596913553	596768556-596913553
GL834933.1	Chr1_supercontig_000000521	596913554-597034082	596913554-597034082
GL834934.1	Chr1_supercontig_000000522	597034083-597075800	597034083-597075800
GL834935.1	Chr1_supercontig_000000523	597075801-597283186	597075801-597283186
GL834936.1	Chr1_supercontig_000000524	597283187-597338135	597283187-597338135
GL834937.1	Chr1_supercontig_000000525	597338136-597419675	597338136-597419675
GL834938.1	Chr1_supercontig_000000526	597419676-597640470	597419676-597640470
GL834939.1	Chr1_supercontig_000000527	597640471-597855618	597640471-597855618
GL834940.1	Chr1_supercontig_000000528	597855619-597879589	597855619-597879589
GL834941.1	Chr1_supercontig_000000529	597879590-597970760	597879590-597970760
GL834942.1	Chr1_supercontig_000000530	597970761-598115200	597970761-598115200
GL834943.1	Chr1_supercontig_000000531	598115201-598183581	598115201-598183581
GL834944.1	Chr1_supercontig_000000532	598183582-598349421	598183582-598349421
GL834945.1	Chr1_supercontig_000000533	598349422-598390066	598349422-598390066
GL834946.1	Chr1_supercontig_000000534	598390067-598528132	598390067-598528132
GL834947.1	Chr1_supercontig_000000535	598528133-598916628	598528133-598916628
GL834948.1	Chr1_supercontig_000000536	598916629-598939033	598916629-598939033
GL834949.1	Chr1_supercontig_000000537	598939034-599084078	598939034-599084078
GL834950.1	Chr1_supercontig_000000538	599084079-599266983	599084079-599266983
GL834951.1	Chr1_supercontig_000000539	599266984-599316241	599266984-599316241
GL834952.1	Chr1_supercontig_000000540	599316242-599418921	599316242-599418921
GL834953.1	Chr1_supercontig_000000541	599418922-599514758	599418922-599514758
GL834954.1	Chr1_supercontig_000000542	599514759-599528635	599514759-599528635
GL834955.1	Chr1_supercontig_000000543	599528636-599561963	599528636-599561963
GL834956.1	Chr1_supercontig_000000544	599561964-599664546	599561964-599664546
GL834957.1	Chr1_supercontig_000000545	599664547-599943501	599664547-599943501
GL834958.1	Chr1_supercontig_000000546	599943502-600243112	599943502-600243112
GL834959.1	Chr1_supercontig_000000547	600243113-600365792	600243113-600365792
GL834960.1	Chr1_supercontig_000000548	600365793-600394899	600365793-600394899
GL834961.1	Chr1_supercontig_000000549	600394900-600450712	600394900-600450712
GL834962.1	Chr1_supercontig_000000550	600450713-600765855	600450713-600765855
GL834963.1	Chr1_supercontig_000000551	600765856-600796292	600765856-600796292
GL834964.1	Chr1_supercontig_000000552	600796293-600829721	600796293-600829721
GL834965.1	Chr1_supercontig_000000553	600829722-600862009	600829722-600862009
GL834966.1	Chr1_supercontig_000000554	600862010-600905911	600862010-600905911
GL834967.1	Chr1_supercontig_000000555	600905912-601223534	600905912-601223534
GL834968.1	Chr1_supercontig_000000556	601223535-601391747	601223535-601391747
GL834969.1	Chr1_supercontig_000000557	601391748-601472835	601391748-601472835
GL834970.1	Chr1_supercontig_000000558	601472836-601549074	601472836-601549074
GL834971.1	Chr1_supercontig_000000559	601549075-601796422	601549075-601796422
GL834972.1	Chr1_supercontig_000000560	601796423-602144305	601796423-602144305
GL834973.1	Chr1_supercontig_000000561	602144306-602215402	602144306-602215402
GL834974.1	Chr1_supercontig_000000562	602215403-602279876	602215403-602279876
GL834975.1	Chr1_supercontig_000000563	602279877-602489445	602279877-602489445
GL834976.1	Chr1_supercontig_000000564	602489446-602492509	602489446-602492509
GL834977.1	Chr1_supercontig_000000565	602492510-602799843	602492510-602799843
GL834978.1	Chr1_supercontig_000000566	602799844-602857213	602799844-602857213
GL834979.1	Chr1_supercontig_000000567	602857214-602901649	602857214-602901649
GL834980.1	Chr1_supercontig_000000568	602901650-603064847	602901650-603064847
GL834981.1	Chr1_supercontig_000000569	603064848-603097955	603064848-603097955
GL834982.1	Chr1_supercontig_000000570	603097956-603273681	603097956-603273681
GL834983.1	Chr1_supercontig_000000571	603273682-603299865	603273682-603299865
GL834984.1	Chr1_supercontig_000000572	603299866-603378157	603299866-603378157
GL834985.1	Chr1_supercontig_000000573	603378158-603482685	603378158-603482685
GL834986.1	Chr1_supercontig_000000574	603482686-603553373	603482686-603553373
GL834987.1	Chr1_supercontig_000000575	603553374-603657941	603553374-603657941
GL834988.1	Chr1_supercontig_000000576	603657942-603698469	603657942-603698469
GL834989.1	Chr1_supercontig_000000577	603698470-603764155	603698470-603764155
GL834990.1	Chr1_supercontig_000000578	603764156-603900674	603764156-603900674
GL834991.1	Chr1_supercontig_000000579	603900675-604038297	603900675-604038297
GL834992.1	Chr1_supercontig_000000580	604038298-604162432	604038298-604162432
GL834993.1	Chr1_supercontig_000000581	604162433-604173324	604162433-604173324
GL834994.1	Chr1_supercontig_000000582	604173325-604248018	604173325-604248018
GL834995.1	Chr1_supercontig_000000583	604248019-604289729	604248019-604289729
GL834996.1	Chr1_supercontig_000000584	604289730-604389121	604289730-604389121
GL834997.1	Chr1_supercontig_000000585	604389122-604460523	604389122-604460523
GL834998.1	Chr1_supercontig_000000586	604460524-605001441	604460524-605001441
GL834999.1	Chr1_supercontig_000000587	605001442-605055967	605001442-605055967
GL835000.1	Chr1_supercontig_000000588	605055968-605134197	605055968-605134197
GL835001.1	Chr1_supercontig_000000589	605134198-605182290	605134198-605182290
GL835002.1	Chr1_supercontig_000000590	605182291-605270102	605182291-605270102
GL835003.1	Chr1_supercontig_000000591	605270103-605409297	605270103-605409297
GL835004.1	Chr1_supercontig_000000592	605409298-605480565	605409298-605480565
GL835005.1	Chr1_supercontig_000000593	605480566-605603155	605480566-605603155
GL835006.1	Chr1_supercontig_000000594	605603156-605659215	605603156-605659215
GL835007.1	Chr1_supercontig_000000595	605659216-605998648	605659216-605998648
GL835008.1	Chr1_supercontig_000000596	605998649-606021184	605998649-606021184
GL835009.1	Chr1_supercontig_000000597	606021185-606040937	606021185-606040937
GL835010.1	Chr1_supercontig_000000598	606040938-606135338	606040938-606135338
GL835011.1	Chr1_supercontig_000000599	606135339-606213366	606135339-606213366
GL835012.1	Chr1_supercontig_000000600	606213367-606290394	606213367-606290394
GL835013.1	Chr1_supercontig_000000601	606290395-606475640	606290395-606475640
GL835014.1	Chr1_supercontig_000000602	606475641-606597617	606475641-606597617
GL835015.1	Chr1_supercontig_000000603	606597618-606657916	606597618-606657916
GL835016.1	Chr1_supercontig_000000604	606657917-606755500	606657917-606755500
GL835017.1	Chr1_supercontig_000000605	606755501-606815891	606755501-606815891
GL835018.1	Chr1_supercontig_000000606	606815892-607005190	606815892-607005190
GL835019.1	Chr1_supercontig_000000607	607005191-607112384	607005191-607112384
GL835020.1	Chr1_supercontig_000000608	607112385-607198560	607112385-607198560
GL835021.1	Chr1_supercontig_000000609	607198561-607213825	607198561-607213825
GL835022.1	Chr1_supercontig_000000610	607213826-607236868	607213826-607236868
GL835023.1	Chr1_supercontig_000000611	607236869-607250897	607236869-607250897
GL835024.1	Chr1_supercontig_000000612	607250898-607313768	607250898-607313768
GL835025.1	Chr1_supercontig_000000613	607313769-607331110	607313769-607331110
GL835026.1	Chr1_supercontig_000000614	607331111-607561725	607331111-607561725
GL835027.1	Chr1_supercontig_000000615	607561726-607605834	607561726-607605834
GL835028.1	Chr1_supercontig_000000616	607605835-607713131	607605835-607713131
GL835029.1	Chr1_supercontig_000000617	607713132-607792467	607713132-607792467
GL835030.1	Chr1_supercontig_000000618	607792468-607793798	607792468-607793798
GL835031.1	Chr1_supercontig_000000619	607793799-607997067	607793799-607997067
GL835032.1	Chr1_supercontig_000000620	607997068-608026828	607997068-608026828
GL835033.1	Chr1_supercontig_000000621	608026829-608097725	608026829-608097725
GL835034.1	Chr1_supercontig_000000622	608097726-608313132	608097726-608313132
GL835035.1	Chr1_supercontig_000000623	608313133-608482681	608313133-608482681
GL835036.1	Chr1_supercontig_000000624	608482682-608543741	608482682-608543741
GL835037.1	Chr1_supercontig_000000625	608543742-608639568	608543742-608639568
GL835038.1	Chr1_supercontig_000000626	608639569-608705416	608639569-608705416
GL835039.1	Chr1_supercontig_000000627	608705417-608772792	608705417-608772792
GL835040.1	Chr1_supercontig_000000628	608772793-608800147	608772793-608800147
GL835041.1	Chr1_supercontig_000000629	608800148-609019630	608800148-609019630
GL835042.1	Chr1_supercontig_000000630	609019631-609261624	609019631-609261624
GL835043.1	Chr1_supercontig_000000631	609261625-609303312	609261625-609303312
GL835044.1	Chr1_supercontig_000000632	609303313-609455859	609303313-609455859
GL835045.1	Chr1_supercontig_000000633	609455860-609476877	609455860-609476877
GL835046.1	Chr1_supercontig_000000634	609476878-609743327	609476878-609743327
GL835047.1	Chr1_supercontig_000000635	609743328-609747316	609743328-609747316
GL835048.1	Chr1_supercontig_000000636	609747317-609846180	609747317-609846180
GL835049.1	Chr1_supercontig_000000637	609846181-609891434	609846181-609891434
GL835050.1	Chr1_supercontig_000000638	609891435-609977336	609891435-609977336
GL835051.1	Chr1_supercontig_000000639	609977337-610026745	609977337-610026745
GL835052.1	Chr1_supercontig_000000640	610026746-610114732	610026746-610114732
GL835053.1	Chr1_supercontig_000000641	610114733-610133407	610114733-610133407
GL835054.1	Chr1_supercontig_000000642	610133408-610176994	610133408-610176994
GL835055.1	Chr1_supercontig_000000643	610176995-610484588	610176995-610484588
GL835056.1	Chr1_supercontig_000000644	610484589-610622545	610484589-610622545
GL835057.1	Chr1_supercontig_000000645	610622546-610679115	610622546-610679115
GL835058.1	Chr1_supercontig_000000646	610679116-610812293	610679116-610812293
GL835059.1	Chr1_supercontig_000000647	610812294-610974553	610812294-610974553
GL835060.1	Chr1_supercontig_000000648	610974554-611026364	610974554-611026364
GL835061.1	Chr1_supercontig_000000649	611026365-611089948	611026365-611089948
GL835062.1	Chr1_supercontig_000000650	611089949-611115654	611089949-611115654
GL835063.1	Chr1_supercontig_000000651	611115655-611183794	611115655-611183794
GL835064.1	Chr1_supercontig_000000652	611183795-611205849	611183795-611205849
GL835065.1	Chr1_supercontig_000000653	611205850-611243475	611205850-611243475
GL835066.1	Chr1_supercontig_000000654	611243476-611283408	611243476-611283408
GL835067.1	Chr1_supercontig_000000655	611283409-611539291	611283409-611539291
GL835068.1	Chr1_supercontig_000000656	611539292-611721726	611539292-611721726
GL835069.1	Chr1_supercontig_000000657	611721727-611855349	611721727-611855349
GL835070.1	Chr1_supercontig_000000658	611855350-611895849	611855350-611895849
GL835071.1	Chr1_supercontig_000000659	611895850-612060899	611895850-612060899
GL835072.1	Chr1_supercontig_000000660	612060900-612075804	612060900-612075804
GL835073.1	Chr1_supercontig_000000661	612075805-612198931	612075805-612198931
GL835074.1	Chr1_supercontig_000000662	612198932-612226480	612198932-612226480
GL835075.1	Chr1_supercontig_000000663	612226481-612246660	612226481-612246660
GL835076.1	Chr1_supercontig_000000664	612246661-612381470	612246661-612381470
GL835077.1	Chr1_supercontig_000000665	612381471-612650573	612381471-612650573
GL835078.1	Chr1_supercontig_000000666	612650574-612681599	612650574-612681599
GL835079.1	Chr1_supercontig_000000667	612681600-612728778	612681600-612728778
GL835080.1	Chr1_supercontig_000000668	612728779-612755431	612728779-612755431
GL835081.1	Chr1_supercontig_000000669	612755432-612859400	612755432-612859400
GL835082.1	Chr1_supercontig_000000670	612859401-612881578	612859401-612881578
GL835083.1	Chr1_supercontig_000000671	612881579-612942342	612881579-612942342
GL835084.1	Chr1_supercontig_000000672	612942343-612985228	612942343-612985228
GL835085.1	Chr1_supercontig_000000673	612985229-613077418	612985229-613077418
GL835086.1	Chr1_supercontig_000000674	613077419-613164625	613077419-613164625
GL835087.1	Chr1_supercontig_000000675	613164626-613250438	613164626-613250438
GL835088.1	Chr1_supercontig_000000676	613250439-613265773	613250439-613265773
GL835089.1	Chr1_supercontig_000000677	613265774-613347365	613265774-613347365
GL835090.1	Chr1_supercontig_000000678	613347366-613375524	613347366-613375524
GL835091.1	Chr1_supercontig_000000679	613375525-613386572	613375525-613386572
GL835092.1	Chr1_supercontig_000000680	613386573-613464159	613386573-613464159
GL835093.1	Chr1_supercontig_000000681	613464160-613525896	613464160-613525896
GL835094.1	Chr1_supercontig_000000682	613525897-613705310	613525897-613705310
GL835095.1	Chr1_supercontig_000000683	613705311-613736772	613705311-613736772
GL835096.1	Chr1_supercontig_000000684	613736773-613898634	613736773-613898634
GL835097.1	Chr1_supercontig_000000685	613898635-613941244	613898635-613941244
GL835098.1	Chr1_supercontig_000000686	613941245-613983824	613941245-613983824
GL835099.1	Chr1_supercontig_000000687	613983825-613998120	613983825-613998120
GL835100.1	Chr1_supercontig_000000688	613998121-614181053	613998121-614181053
GL835101.1	Chr1_supercontig_000000689	614181054-614209793	614181054-614209793
GL835102.1	Chr1_supercontig_000000690	614209794-614222094	614209794-614222094
GL835103.1	Chr1_supercontig_000000691	614222095-614274470	614222095-614274470
GL835104.1	Chr1_supercontig_000000692	614274471-614302336	614274471-614302336
GL835105.1	Chr1_supercontig_000000693	614302337-614351842	614302337-614351842
GL835106.1	Chr1_supercontig_000000694	614351843-614443356	614351843-614443356
GL835107.1	Chr1_supercontig_000000695	614443357-614562464	614443357-614562464
GL835108.1	Chr1_supercontig_000000696	614562465-614636240	614562465-614636240
GL835109.1	Chr1_supercontig_000000697	614636241-614688813	614636241-614688813
GL835110.1	Chr1_supercontig_000000698	614688814-614729506	614688814-614729506
GL835111.1	Chr1_supercontig_000000699	614729507-614908101	614729507-614908101
GL835112.1	Chr1_supercontig_000000700	614908102-615061382	614908102-615061382
GL835113.1	Chr1_supercontig_000000701	615061383-615108722	615061383-615108722
GL835114.1	Chr1_supercontig_000000702	615108723-615196149	615108723-615196149
GL835115.1	Chr1_supercontig_000000703	615196150-615371274	615196150-615371274
GL835116.1	Chr1_supercontig_000000704	615371275-615376543	615371275-615376543
GL835117.1	Chr1_supercontig_000000705	615376544-615429204	615376544-615429204
GL835118.1	Chr1_supercontig_000000706	615429205-615496362	615429205-615496362
GL835119.1	Chr1_supercontig_000000707	615496363-615633644	615496363-615633644
GL835120.1	Chr1_supercontig_000000708	615633645-615675014	615633645-615675014
GL835121.1	Chr1_supercontig_000000709	615675015-615710890	615675015-615710890
GL835122.1	Chr1_supercontig_000000710	615710891-615932897	615710891-615932897
GL835123.1	Chr1_supercontig_000000711	615932898-616009799	615932898-616009799
GL835124.1	Chr1_supercontig_000000712	616009800-616021804	616009800-616021804
GL835125.1	Chr1_supercontig_000000713	616021805-616075104	616021805-616075104
GL835126.1	Chr1_supercontig_000000714	616075105-616178947	616075105-616178947
GL835127.1	Chr1_supercontig_000000715	616178948-616271883	616178948-616271883
GL835128.1	Chr1_supercontig_000000716	616271884-616308588	616271884-616308588
GL835129.1	Chr1_supercontig_000000717	616308589-616460419	616308589-616460419
GL835130.1	Chr1_supercontig_000000718	616460420-616495057	616460420-616495057
GL835131.1	Chr1_supercontig_000000719	616495058-616541016	616495058-616541016
GL835132.1	Chr1_supercontig_000000720	616541017-616613470	616541017-616613470
GL835133.1	Chr1_supercontig_000000721	616613471-616657991	616613471-616657991
GL835134.1	Chr1_supercontig_000000722	616657992-616669433	616657992-616669433
GL835135.1	Chr1_supercontig_000000723	616669434-616830058	616669434-616830058
GL835136.1	Chr1_supercontig_000000724	616830059-616856836	616830059-616856836
GL835137.1	Chr1_supercontig_000000725	616856837-616938153	616856837-616938153
GL835138.1	Chr1_supercontig_000000726	616938154-616979546	616938154-616979546
GL835139.1	Chr1_supercontig_000000727	616979547-617126723	616979547-617126723
GL835140.1	Chr1_supercontig_000000728	617126724-617157618	617126724-617157618
GL835141.1	Chr1_supercontig_000000729	617157619-617265517	617157619-617265517
GL835142.1	Chr1_supercontig_000000730	617265518-617291874	617265518-617291874
GL835143.1	Chr1_supercontig_000000731	617291875-617431881	617291875-617431881
GL835144.1	Chr1_supercontig_000000732	617431882-617481937	617431882-617481937
GL835145.1	Chr1_supercontig_000000733	617481938-617544395	617481938-617544395
GL835146.1	Chr1_supercontig_000000734	617544396-617610891	617544396-617610891
GL835147.1	Chr1_supercontig_000000735	617610892-618136180	617610892-618136180
GL835148.1	Chr1_supercontig_000000736	618136181-618181041	618136181-618181041
GL835149.1	Chr1_supercontig_000000737	618181042-618192313	618181042-618192313
GL835150.1	Chr1_supercontig_000000738	618192314-618251720	618192314-618251720
GL835151.1	Chr1_supercontig_000000739	618251721-618396170	618251721-618396170
GL835152.1	Chr1_supercontig_000000740	618396171-618452331	618396171-618452331
GL835153.1	Chr1_supercontig_000000741	618452332-618525837	618452332-618525837
GL835154.1	Chr1_supercontig_000000742	618525838-618569777	618525838-618569777
GL835155.1	Chr1_supercontig_000000743	618569778-618604595	618569778-618604595
GL835156.1	Chr1_supercontig_000000744	618604596-618782728	618604596-618782728
GL835157.1	Chr1_supercontig_000000745	618782729-618836268	618782729-618836268
GL835158.1	Chr1_supercontig_000000746	618836269-618917365	618836269-618917365
GL835159.1	Chr1_supercontig_000000747	618917366-618983873	618917366-618983873
GL835160.1	Chr1_supercontig_000000748	618983874-618998317	618983874-618998317
GL835161.1	Chr1_supercontig_000000749	618998318-619086210	618998318-619086210
GL835162.1	Chr1_supercontig_000000750	619086211-619134095	619086211-619134095
GL835163.1	Chr1_supercontig_000000751	619134096-619143738	619134096-619143738
GL835164.1	Chr1_supercontig_000000752	619143739-619197584	619143739-619197584
GL835165.1	Chr1_supercontig_000000753	619197585-619324792	619197585-619324792
GL835166.1	Chr1_supercontig_000000754	619324793-619442108	619324793-619442108
GL835167.1	Chr1_supercontig_000000755	619442109-619482425	619442109-619482425
GL835168.1	Chr1_supercontig_000000756	619482426-619583186	619482426-619583186
GL835169.1	Chr1_supercontig_000000757	619583187-619682166	619583187-619682166
GL835170.1	Chr1_supercontig_000000758	619682167-619745297	619682167-619745297
GL835171.1	Chr1_supercontig_000000759	619745298-619785798	619745298-619785798
GL835172.1	Chr1_supercontig_000000760	619785799-619807507	619785799-619807507
GL835173.1	Chr1_supercontig_000000761	619807508-619833690	619807508-619833690
GL835174.1	Chr1_supercontig_000000762	619833691-619869735	619833691-619869735
GL835175.1	Chr1_supercontig_000000763	619869736-619945625	619869736-619945625
GL835176.1	Chr1_supercontig_000000764	619945626-619985774	619945626-619985774
GL835177.1	Chr1_supercontig_000000765	619985775-620047132	619985775-620047132
GL835178.1	Chr1_supercontig_000000766	620047133-620088427	620047133-620088427
GL835179.1	Chr1_supercontig_000000767	620088428-620277151	620088428-620277151
GL835180.1	Chr1_supercontig_000000768	620277152-620282227	620277152-620282227
GL835181.1	Chr1_supercontig_000000769	620282228-620328736	620282228-620328736
GL835182.1	Chr1_supercontig_000000770	620328737-620359191	620328737-620359191
GL835183.1	Chr1_supercontig_000000771	620359192-620414243	620359192-620414243
GL835184.1	Chr1_supercontig_000000772	620414244-620527024	620414244-620527024
GL835185.1	Chr1_supercontig_000000773	620527025-620564457	620527025-620564457
GL835186.1	Chr1_supercontig_000000774	620564458-620637412	620564458-620637412
GL835187.1	Chr1_supercontig_000000775	620637413-620685865	620637413-620685865
GL835188.1	Chr1_supercontig_000000776	620685866-620945917	620685866-620945917
GL835189.1	Chr1_supercontig_000000777	620945918-621064561	620945918-621064561
GL835190.1	Chr1_supercontig_000000778	621064562-621113499	621064562-621113499
GL835191.1	Chr1_supercontig_000000779	621113500-621178667	621113500-621178667
GL835192.1	Chr1_supercontig_000000780	621178668-621234015	621178668-621234015
GL835193.1	Chr1_supercontig_000000781	621234016-621472125	621234016-621472125
GL835194.1	Chr1_supercontig_000000782	621472126-621486089	621472126-621486089
GL835195.1	Chr1_supercontig_000000783	621486090-621523244	621486090-621523244
GL835196.1	Chr1_supercontig_000000784	621523245-621531806	621523245-621531806
GL835197.1	Chr1_supercontig_000000785	621531807-621547420	621531807-621547420
GL835198.1	Chr1_supercontig_000000786	621547421-621575105	621547421-621575105
GL835199.1	Chr1_supercontig_000000787	621575106-621715210	621575106-621715210
GL835200.1	Chr1_supercontig_000000788	621715211-621772766	621715211-621772766
GL835201.1	Chr1_supercontig_000000789	621772767-621864659	621772767-621864659
GL835202.1	Chr1_supercontig_000000790	621864660-621956585	621864660-621956585
GL835203.1	Chr1_supercontig_000000791	621956586-622073247	621956586-622073247
GL835204.1	Chr1_supercontig_000000792	622073248-622171902	622073248-622171902
GL835205.1	Chr1_supercontig_000000793	622171903-622206141	622171903-622206141
GL835206.1	Chr1_supercontig_000000794	622206142-622259452	622206142-622259452
GL835207.1	Chr1_supercontig_000000795	622259453-622347557	622259453-622347557
GL835208.1	Chr1_supercontig_000000796	622347558-622450244	622347558-622450244
GL835209.1	Chr1_supercontig_000000797	622450245-622530737	622450245-622530737
GL835210.1	Chr1_supercontig_000000798	622530738-622553752	622530738-622553752
GL835211.1	Chr1_supercontig_000000799	622553753-622568311	622553753-622568311
GL835212.1	Chr1_supercontig_000000800	622568312-622729080	622568312-622729080
GL835213.1	Chr1_supercontig_000000801	622729081-622787641	622729081-622787641
GL835214.1	Chr1_supercontig_000000802	622787642-622875872	622787642-622875872
GL835215.1	Chr1_supercontig_000000803	622875873-622886963	622875873-622886963
GL835216.1	Chr1_supercontig_000000804	622886964-623016034	622886964-623016034
GL835217.1	Chr1_supercontig_000000805	623016035-623057358	623016035-623057358
GL835218.1	Chr1_supercontig_000000806	623057359-623074732	623057359-623074732
GL835219.1	Chr1_supercontig_000000807	623074733-623148173	623074733-623148173
GL835220.1	Chr1_supercontig_000000808	623148174-623229937	623148174-623229937
GL835221.1	Chr1_supercontig_000000809	623229938-623298587	623229938-623298587
GL835222.1	Chr1_supercontig_000000810	623298588-623464848	623298588-623464848
GL835223.1	Chr1_supercontig_000000811	623464849-623479034	623464849-623479034
GL835224.1	Chr1_supercontig_000000812	623479035-623560718	623479035-623560718
GL835225.1	Chr1_supercontig_000000813	623560719-623646401	623560719-623646401
GL835226.1	Chr1_supercontig_000000814	623646402-623687201	623646402-623687201
GL835227.1	Chr1_supercontig_000000815	623687202-623709710	623687202-623709710
GL835228.1	Chr1_supercontig_000000816	623709711-623794624	623709711-623794624
GL835229.1	Chr1_supercontig_000000817	623794625-623888027	623794625-623888027
GL835230.1	Chr1_supercontig_000000818	623888028-624004325	623888028-624004325
GL835231.1	Chr1_supercontig_000000819	624004326-624150902	624004326-624150902
GL835232.1	Chr1_supercontig_000000820	624150903-624159242	624150903-624159242
GL835233.1	Chr1_supercontig_000000821	624159243-624207227	624159243-624207227
GL835234.1	Chr1_supercontig_000000822	624207228-624354045	624207228-624354045
GL835235.1	Chr1_supercontig_000000823	624354046-624365592	624354046-624365592
GL835236.1	Chr1_supercontig_000000824	624365593-624476490	624365593-624476490
GL835237.1	Chr1_supercontig_000000825	624476491-624479852	624476491-624479852
GL835238.1	Chr1_supercontig_000000826	624479853-624497354	624479853-624497354
GL835239.1	Chr1_supercontig_000000827	624497355-624666941	624497355-624666941
GL835240.1	Chr1_supercontig_000000828	624666942-624687732	624666942-624687732
GL835241.1	Chr1_supercontig_000000829	624687733-624720929	624687733-624720929
GL835242.1	Chr1_supercontig_000000830	624720930-624813859	624720930-624813859
GL835243.1	Chr1_supercontig_000000831	624813860-624832093	624813860-624832093
GL835244.1	Chr1_supercontig_000000832	624832094-624847603	624832094-624847603
GL835245.1	Chr1_supercontig_000000833	624847604-624876962	624847604-624876962
GL835246.1	Chr1_supercontig_000000834	624876963-624910436	624876963-624910436
GL835247.1	Chr1_supercontig_000000835	624910437-625040182	624910437-625040182
GL835248.1	Chr1_supercontig_000000836	625040183-625337794	625040183-625337794
GL835249.1	Chr1_supercontig_000000837	625337795-625364199	625337795-625364199
GL835250.1	Chr1_supercontig_000000838	625364200-625382649	625364200-625382649
GL835251.1	Chr1_supercontig_000000839	625382650-625473776	625382650-625473776
GL835252.1	Chr1_supercontig_000000840	625473777-625622065	625473777-625622065
GL835253.1	Chr1_supercontig_000000841	625622066-625704853	625622066-625704853
GL835254.1	Chr1_supercontig_000000842	625704854-625768383	625704854-625768383
GL835255.1	Chr1_supercontig_000000843	625768384-625835866	625768384-625835866
GL835256.1	Chr1_supercontig_000000844	625835867-625898652	625835867-625898652
GL835257.1	Chr1_supercontig_000000845	625898653-626049675	625898653-626049675
GL835258.1	Chr1_supercontig_000000846	626049676-626198551	626049676-626198551
GL835259.1	Chr1_supercontig_000000847	626198552-626227794	626198552-626227794
GL835260.1	Chr1_supercontig_000000848	626227795-626355135	626227795-626355135
GL835261.1	Chr1_supercontig_000000849	626355136-626381568	626355136-626381568
GL835262.1	Chr1_supercontig_000000850	626381569-626756203	626381569-626756203
GL835263.1	Chr1_supercontig_000000851	626756204-626790685	626756204-626790685
GL835264.1	Chr1_supercontig_000000852	626790686-626935256	626790686-626935256
GL835265.1	Chr1_supercontig_000000853	626935257-626962358	626935257-626962358
GL835266.1	Chr1_supercontig_000000854	626962359-627064093	626962359-627064093
GL835267.1	Chr1_supercontig_000000855	627064094-627120383	627064094-627120383
GL835268.1	Chr1_supercontig_000000856	627120384-627245866	627120384-627245866
GL835269.1	Chr1_supercontig_000000857	627245867-627312524	627245867-627312524
GL835270.1	Chr1_supercontig_000000858	627312525-627345846	627312525-627345846
GL835271.1	Chr1_supercontig_000000859	627345847-627382459	627345847-627382459
GL835272.1	Chr1_supercontig_000000860	627382460-627420116	627382460-627420116
GL835273.1	Chr1_supercontig_000000861	627420117-627465677	627420117-627465677
GL835274.1	Chr1_supercontig_000000862	627465678-627509131	627465678-627509131
GL835275.1	Chr1_supercontig_000000863	627509132-627567627	627509132-627567627
GL835276.1	Chr1_supercontig_000000864	627567628-627669299	627567628-627669299
GL835277.1	Chr1_supercontig_000000865	627669300-627683602	627669300-627683602
GL835278.1	Chr1_supercontig_000000866	627683603-627800500	627683603-627800500
GL835279.1	Chr1_supercontig_000000867	627800501-627850760	627800501-627850760
GL835280.1	Chr1_supercontig_000000868	627850761-627917526	627850761-627917526
GL835281.1	Chr1_supercontig_000000869	627917527-627925640	627917527-627925640
GL835282.1	Chr1_supercontig_000000870	627925641-627973550	627925641-627973550
GL835283.1	Chr1_supercontig_000000871	627973551-627996087	627973551-627996087
GL835284.1	Chr1_supercontig_000000872	627996088-628036627	627996088-628036627
GL835285.1	Chr1_supercontig_000000873	628036628-628108171	628036628-628108171
GL835286.1	Chr1_supercontig_000000874	628108172-628183010	628108172-628183010
GL835287.1	Chr1_supercontig_000000875	628183011-628271426	628183011-628271426
GL835288.1	Chr1_supercontig_000000876	628271427-628488791	628271427-628488791
GL835289.1	Chr1_supercontig_000000877	628488792-628539148	628488792-628539148
GL835290.1	Chr1_supercontig_000000878	628539149-628808372	628539149-628808372
GL835291.1	Chr1_supercontig_000000879	628808373-628856884	628808373-628856884
GL835292.1	Chr1_supercontig_000000880	628856885-628919678	628856885-628919678
GL835293.1	Chr1_supercontig_000000881	628919679-628970805	628919679-628970805
GL835294.1	Chr1_supercontig_000000882	628970806-629022650	628970806-629022650
GL835295.1	Chr1_supercontig_000000883	629022651-629049297	629022651-629049297
GL835296.1	Chr1_supercontig_000000884	629049298-629060711	629049298-629060711
GL835297.1	Chr1_supercontig_000000885	629060712-629138562	629060712-629138562
GL835298.1	Chr1_supercontig_000000886	629138563-629299976	629138563-629299976
GL835299.1	Chr1_supercontig_000000887	629299977-629308396	629299977-629308396
GL835300.1	Chr1_supercontig_000000888	629308397-629373889	629308397-629373889
GL835301.1	Chr1_supercontig_000000889	629373890-629413520	629373890-629413520
GL835302.1	Chr1_supercontig_000000890	629413521-629458580	629413521-629458580
GL835303.1	Chr1_supercontig_000000891	629458581-629521005	629458581-629521005
GL835304.1	Chr1_supercontig_000000892	629521006-629859751	629521006-629859751
GL835305.1	Chr1_supercontig_000000893	629859752-629891118	629859752-629891118
GL835306.1	Chr1_supercontig_000000894	629891119-629927747	629891119-629927747
GL835307.1	Chr1_supercontig_000000895	629927748-630004367	629927748-630004367
GL835308.1	Chr1_supercontig_000000896	630004368-630065319	630004368-630065319
GL835309.1	Chr1_supercontig_000000897	630065320-630092979	630065320-630092979
GL835310.1	Chr1_supercontig_000000898	630092980-630134229	630092980-630134229
GL835311.1	Chr1_supercontig_000000899	630134230-630157972	630134230-630157972
GL835312.1	Chr1_supercontig_000000900	630157973-630206909	630157973-630206909
GL835313.1	Chr1_supercontig_000000901	630206910-630263424	630206910-630263424
GL835314.1	Chr1_supercontig_000000902	630263425-630359090	630263425-630359090
GL835315.1	Chr1_supercontig_000000903	630359091-630408279	630359091-630408279
GL835316.1	Chr1_supercontig_000000904	630408280-630428964	630408280-630428964
GL835317.1	Chr1_supercontig_000000905	630428965-630479594	630428965-630479594
GL835318.1	Chr1_supercontig_000000906	630479595-630560644	630479595-630560644
GL835319.1	Chr1_supercontig_000000907	630560645-630648908	630560645-630648908
GL835320.1	Chr1_supercontig_000000908	630648909-630720291	630648909-630720291
GL835321.1	Chr1_supercontig_000000909	630720292-630730379	630720292-630730379
GL835322.1	Chr1_supercontig_000000910	630730380-630757466	630730380-630757466
GL835323.1	Chr1_supercontig_000000911	630757467-630784418	630757467-630784418
GL835324.1	Chr1_supercontig_000000912	630784419-630803285	630784419-630803285
GL835325.1	Chr1_supercontig_000000913	630803286-630892453	630803286-630892453
GL835326.1	Chr1_supercontig_000000914	630892454-630959021	630892454-630959021
GL835327.1	Chr1_supercontig_000000915	630959022-631050968	630959022-631050968
GL835328.1	Chr1_supercontig_000000916	631050969-631109471	631050969-631109471
GL835329.1	Chr1_supercontig_000000917	631109472-631219445	631109472-631219445
GL835330.1	Chr1_supercontig_000000918	631219446-631281661	631219446-631281661
GL835331.1	Chr1_supercontig_000000919	631281662-631378546	631281662-631378546
GL835332.1	Chr1_supercontig_000000920	631378547-631448667	631378547-631448667
GL835333.1	Chr1_supercontig_000000921	631448668-631521421	631448668-631521421
GL835334.1	Chr1_supercontig_000000922	631521422-631574210	631521422-631574210
GL835335.1	Chr1_supercontig_000000923	631574211-631766979	631574211-631766979
GL835336.1	Chr1_supercontig_000000924	631766980-631874180	631766980-631874180
GL835337.1	Chr1_supercontig_000000925	631874181-631880629	631874181-631880629
GL835338.1	Chr1_supercontig_000000926	631880630-631900812	631880630-631900812
GL835339.1	Chr1_supercontig_000000927	631900813-632082120	631900813-632082120
GL835340.1	Chr1_supercontig_000000928	632082121-632138110	632082121-632138110
GL835341.1	Chr1_supercontig_000000929	632138111-632171810	632138111-632171810
GL835342.1	Chr1_supercontig_000000930	632171811-632251499	632171811-632251499
GL835343.1	Chr1_supercontig_000000931	632251500-632425072	632251500-632425072
GL835344.1	Chr1_supercontig_000000932	632425073-632623082	632425073-632623082
GL835345.1	Chr1_supercontig_000000933	632623083-632640148	632623083-632640148
GL835346.1	Chr1_supercontig_000000934	632640149-632687003	632640149-632687003
GL835347.1	Chr1_supercontig_000000935	632687004-632715873	632687004-632715873
GL835348.1	Chr1_supercontig_000000936	632715874-632743759	632715874-632743759
GL835349.1	Chr1_supercontig_000000937	632743760-632760926	632743760-632760926
GL835350.1	Chr1_supercontig_000000938	632760927-632777895	632760927-632777895
GL835351.1	Chr1_supercontig_000000939	632777896-632841005	632777896-632841005
GL835352.1	Chr1_supercontig_000000940	632841006-632920081	632841006-632920081
GL835353.1	Chr1_supercontig_000000941	632920082-633007252	632920082-633007252
GL835354.1	Chr1_supercontig_000000942	633007253-633036330	633007253-633036330
GL835355.1	Chr1_supercontig_000000943	633036331-633084235	633036331-633084235
GL835356.1	Chr1_supercontig_000000944	633084236-633175431	633084236-633175431
GL835357.1	Chr1_supercontig_000000945	633175432-633257242	633175432-633257242
GL835358.1	Chr1_supercontig_000000946	633257243-633278644	633257243-633278644
GL835359.1	Chr1_supercontig_000000947	633278645-633335823	633278645-633335823
GL835360.1	Chr1_supercontig_000000948	633335824-633347723	633335824-633347723
GL835361.1	Chr1_supercontig_000000949	633347724-633413581	633347724-633413581
GL835362.1	Chr1_supercontig_000000950	633413582-633524843	633413582-633524843
GL835363.1	Chr1_supercontig_000000951	633524844-633610994	633524844-633610994
GL835364.1	Chr1_supercontig_000000952	633610995-633665897	633610995-633665897
GL835365.1	Chr1_supercontig_000000953	633665898-633791997	633665898-633791997
GL835366.1	Chr1_supercontig_000000954	633791998-633822542	633791998-633822542
GL835367.1	Chr1_supercontig_000000955	633822543-633875747	633822543-633875747
GL835368.1	Chr1_supercontig_000000956	633875748-633974680	633875748-633974680
GL835369.1	Chr1_supercontig_000000957	633974681-634020150	633974681-634020150
GL835370.1	Chr1_supercontig_000000958	634020151-634134763	634020151-634134763
GL835371.1	Chr1_supercontig_000000959	634134764-634139807	634134764-634139807
GL835372.1	Chr1_supercontig_000000960	634139808-634170202	634139808-634170202
GL835373.1	Chr1_supercontig_000000961	634170203-634209618	634170203-634209618
GL835374.1	Chr1_supercontig_000000962	634209619-634474948	634209619-634474948
GL835375.1	Chr1_supercontig_000000963	634474949-634495480	634474949-634495480
GL835376.1	Chr1_supercontig_000000964	634495481-634504710	634495481-634504710
GL835377.1	Chr1_supercontig_000000965	634504711-634535661	634504711-634535661
GL835378.1	Chr1_supercontig_000000966	634535662-634714257	634535662-634714257
GL835379.1	Chr1_supercontig_000000967	634714258-634756866	634714258-634756866
GL835380.1	Chr1_supercontig_000000968	634756867-634885987	634756867-634885987
GL835381.1	Chr1_supercontig_000000969	634885988-635001409	634885988-635001409
GL835382.1	Chr1_supercontig_000000970	635001410-635118213	635001410-635118213
GL835383.1	Chr1_supercontig_000000971	635118214-635157991	635118214-635157991
GL835384.1	Chr1_supercontig_000000972	635157992-635223647	635157992-635223647
GL835385.1	Chr1_supercontig_000000973	635223648-635307279	635223648-635307279
GL835386.1	Chr1_supercontig_000000974	635307280-635345311	635307280-635345311
GL835387.1	Chr1_supercontig_000000975	635345312-635386494	635345312-635386494
GL835388.1	Chr1_supercontig_000000976	635386495-635454052	635386495-635454052
GL835389.1	Chr1_supercontig_000000977	635454053-635473027	635454053-635473027
GL835390.1	Chr1_supercontig_000000978	635473028-635520115	635473028-635520115
GL835391.1	Chr1_supercontig_000000979	635520116-635627407	635520116-635627407
GL835392.1	Chr1_supercontig_000000980	635627408-635665994	635627408-635665994
GL835393.1	Chr1_supercontig_000000981	635665995-635684180	635665995-635684180
GL835394.1	Chr1_supercontig_000000982	635684181-636002643	635684181-636002643
GL835395.1	Chr1_supercontig_000000983	636002644-636035576	636002644-636035576
GL835396.1	Chr1_supercontig_000000984	636035577-636040696	636035577-636040696
GL835397.1	Chr1_supercontig_000000985	636040697-636115853	636040697-636115853
GL835398.1	Chr1_supercontig_000000986	636115854-636213777	636115854-636213777
GL835399.1	Chr1_supercontig_000000987	636213778-636275781	636213778-636275781
GL835400.1	Chr1_supercontig_000000988	636275782-636318263	636275782-636318263
GL835401.1	Chr1_supercontig_000000989	636318264-636391515	636318264-636391515
GL835402.1	Chr1_supercontig_000000990	636391516-636437730	636391516-636437730
GL835403.1	Chr1_supercontig_000000991	636437731-636478191	636437731-636478191
GL835404.1	Chr1_supercontig_000000992	636478192-636512024	636478192-636512024
GL835405.1	Chr1_supercontig_000000993	636512025-636581316	636512025-636581316
GL835406.1	Chr1_supercontig_000000994	636581317-636598257	636581317-636598257
GL835407.1	Chr1_supercontig_000000995	636598258-636676616	636598258-636676616
GL835408.1	Chr1_supercontig_000000996	636676617-636691619	636676617-636691619
GL835409.1	Chr1_supercontig_000000997	636691620-636726681	636691620-636726681
GL835410.1	Chr1_supercontig_000000998	636726682-636760758	636726682-636760758
GL835411.1	Chr1_supercontig_000000999	636760759-636843175	636760759-636843175
GL835412.1	Chr1_supercontig_000001000	636843176-636870624	636843176-636870624
GL835413.1	Chr1_supercontig_000001001	636870625-636923520	636870625-636923520
GL835414.1	Chr1_supercontig_000001002	636923521-636939794	636923521-636939794
GL835415.1	Chr1_supercontig_000001003	636939795-637047361	636939795-637047361
GL835416.1	Chr1_supercontig_000001004	637047362-637083400	637047362-637083400
GL835417.1	Chr1_supercontig_000001005	637083401-637351964	637083401-637351964
GL835418.1	Chr1_supercontig_000001006	637351965-637368576	637351965-637368576
GL835419.1	Chr1_supercontig_000001007	637368577-637431562	637368577-637431562
GL835420.1	Chr1_supercontig_000001008	637431563-637451398	637431563-637451398
GL835421.1	Chr1_supercontig_000001009	637451399-637485921	637451399-637485921
GL835422.1	Chr1_supercontig_000001010	637485922-637580217	637485922-637580217
GL835423.1	Chr1_supercontig_000001011	637580218-637590922	637580218-637590922
GL835424.1	Chr1_supercontig_000001012	637590923-637628040	637590923-637628040
GL835425.1	Chr1_supercontig_000001013	637628041-637759492	637628041-637759492
GL835426.1	Chr1_supercontig_000001014	637759493-637796238	637759493-637796238
GL835427.1	Chr1_supercontig_000001015	637796239-637823665	637796239-637823665
GL835428.1	Chr1_supercontig_000001016	637823666-638093300	637823666-638093300
GL835429.1	Chr1_supercontig_000001017	638093301-638111444	638093301-638111444
GL835430.1	Chr1_supercontig_000001018	638111445-638139522	638111445-638139522
GL835431.1	Chr1_supercontig_000001019	638139523-638150903	638139523-638150903
GL835432.1	Chr1_supercontig_000001020	638150904-638240977	638150904-638240977
GL835433.1	Chr1_supercontig_000001021	638240978-638305731	638240978-638305731
GL835434.1	Chr1_supercontig_000001022	638305732-638373972	638305732-638373972
GL835435.1	Chr1_supercontig_000001023	638373973-638421651	638373973-638421651
GL835436.1	Chr1_supercontig_000001024	638421652-638431413	638421652-638431413
GL835437.1	Chr1_supercontig_000001025	638431414-638475053	638431414-638475053
GL835438.1	Chr1_supercontig_000001026	638475054-638504256	638475054-638504256
GL835439.1	Chr1_supercontig_000001027	638504257-638590695	638504257-638590695
GL835440.1	Chr1_supercontig_000001028	638590696-638634158	638590696-638634158
GL835441.1	Chr1_supercontig_000001029	638634159-638696852	638634159-638696852
GL835442.1	Chr1_supercontig_000001030	638696853-638724411	638696853-638724411
GL835443.1	Chr1_supercontig_000001031	638724412-638754837	638724412-638754837
GL835444.1	Chr1_supercontig_000001032	638754838-638791233	638754838-638791233
GL835445.1	Chr1_supercontig_000001033	638791234-638863710	638791234-638863710
GL835446.1	Chr1_supercontig_000001034	638863711-639028436	638863711-639028436
GL835447.1	Chr1_supercontig_000001035	639028437-639047882	639028437-639047882
GL835448.1	Chr1_supercontig_000001036	639047883-639113501	639047883-639113501
GL835449.1	Chr1_supercontig_000001037	639113502-639133360	639113502-639133360
GL835450.1	Chr1_supercontig_000001038	639133361-639239552	639133361-639239552
GL835451.1	Chr1_supercontig_000001039	639239553-639292327	639239553-639292327
GL835452.1	Chr1_supercontig_000001040	639292328-639306714	639292328-639306714
GL835453.1	Chr1_supercontig_000001041	639306715-639384552	639306715-639384552
GL835454.1	Chr1_supercontig_000001042	639384553-639425540	639384553-639425540
GL835455.1	Chr1_supercontig_000001043	639425541-639528097	639425541-639528097
GL835456.1	Chr1_supercontig_000001044	639528098-639569251	639528098-639569251
GL835457.1	Chr1_supercontig_000001045	639569252-639601833	639569252-639601833
GL835458.1	Chr1_supercontig_000001046	639601834-639634935	639601834-639634935
GL835459.1	Chr1_supercontig_000001047	639634936-639662076	639634936-639662076
GL835460.1	Chr1_supercontig_000001048	639662077-639697928	639662077-639697928
GL835461.1	Chr1_supercontig_000001049	639697929-639744653	639697929-639744653
GL835462.1	Chr1_supercontig_000001050	639744654-639751980	639744654-639751980
GL835463.1	Chr1_supercontig_000001051	639751981-639771940	639751981-639771940
GL835464.1	Chr1_supercontig_000001052	639771941-639825260	639771941-639825260
GL835465.1	Chr1_supercontig_000001053	639825261-639843327	639825261-639843327
GL835466.1	Chr1_supercontig_000001054	639843328-639959908	639843328-639959908
GL835467.1	Chr1_supercontig_000001055	639959909-640001083	639959909-640001083
GL835468.1	Chr1_supercontig_000001056	640001084-640040035	640001084-640040035
GL835469.1	Chr1_supercontig_000001057	640040036-640100029	640040036-640100029
GL835470.1	Chr1_supercontig_000001058	640100030-640160604	640100030-640160604
GL835471.1	Chr1_supercontig_000001059	640160605-640191968	640160605-640191968
GL835472.1	Chr1_supercontig_000001060	640191969-640237154	640191969-640237154
GL835473.1	Chr1_supercontig_000001061	640237155-640270549	640237155-640270549
GL835474.1	Chr1_supercontig_000001062	640270550-640307415	640270550-640307415
GL835475.1	Chr1_supercontig_000001063	640307416-640348856	640307416-640348856
GL835476.1	Chr1_supercontig_000001064	640348857-640446391	640348857-640446391
GL835477.1	Chr1_supercontig_000001065	640446392-640474060	640446392-640474060
GL835478.1	Chr1_supercontig_000001066	640474061-640518106	640474061-640518106
GL835479.1	Chr1_supercontig_000001067	640518107-640571009	640518107-640571009
GL835480.1	Chr1_supercontig_000001068	640571010-640636908	640571010-640636908
GL835481.1	Chr1_supercontig_000001069	640636909-640702702	640636909-640702702
GL835482.1	Chr1_supercontig_000001070	640702703-640741261	640702703-640741261
GL835483.1	Chr1_supercontig_000001071	640741262-640786726	640741262-640786726
GL835484.1	Chr1_supercontig_000001072	640786727-640805881	640786727-640805881
GL835485.1	Chr1_supercontig_000001073	640805882-640845108	640805882-640845108
GL835486.1	Chr1_supercontig_000001074	640845109-640890432	640845109-640890432
GL835487.1	Chr1_supercontig_000001075	640890433-640964914	640890433-640964914
GL835488.1	Chr1_supercontig_000001076	640964915-641003407	640964915-641003407
GL835489.1	Chr1_supercontig_000001077	641003408-641085126	641003408-641085126
GL835490.1	Chr1_supercontig_000001078	641085127-641106665	641085127-641106665
GL835491.1	Chr1_supercontig_000001079	641106666-641158571	641106666-641158571
GL835492.1	Chr1_supercontig_000001080	641158572-641178344	641158572-641178344
GL835493.1	Chr1_supercontig_000001081	641178345-641221400	641178345-641221400
GL835494.1	Chr1_supercontig_000001082	641221401-641239343	641221401-641239343
GL835495.1	Chr1_supercontig_000001083	641239344-641317874	641239344-641317874
GL835496.1	Chr1_supercontig_000001084	641317875-641428430	641317875-641428430
GL835497.1	Chr1_supercontig_000001085	641428431-641620415	641428431-641620415
GL835498.1	Chr1_supercontig_000001086	641620416-641676920	641620416-641676920
GL835499.1	Chr1_supercontig_000001087	641676921-641748692	641676921-641748692
GL835500.1	Chr1_supercontig_000001088	641748693-641830950	641748693-641830950
GL835501.1	Chr1_supercontig_000001089	641830951-641902303	641830951-641902303
GL835502.1	Chr1_supercontig_000001090	641902304-641931954	641902304-641931954
GL835503.1	Chr1_supercontig_000001091	641931955-641950621	641931955-641950621
GL835504.1	Chr1_supercontig_000001092	641950622-641994862	641950622-641994862
GL835505.1	Chr1_supercontig_000001093	641994863-642058523	641994863-642058523
GL835506.1	Chr1_supercontig_000001094	642058524-642123442	642058524-642123442
GL835507.1	Chr1_supercontig_000001095	642123443-642189656	642123443-642189656
GL835508.1	Chr1_supercontig_000001096	642189657-642213115	642189657-642213115
GL835509.1	Chr1_supercontig_000001097	642213116-642239484	642213116-642239484
GL835510.1	Chr1_supercontig_000001098	642239485-642282999	642239485-642282999
GL835511.1	Chr1_supercontig_000001099	642283000-642369144	642283000-642369144
GL835512.1	Chr1_supercontig_000001100	642369145-642393499	642369145-642393499
GL835513.1	Chr1_supercontig_000001101	642393500-642473844	642393500-642473844
GL835514.1	Chr1_supercontig_000001102	642473845-642502597	642473845-642502597
GL835515.1	Chr1_supercontig_000001103	642502598-642513259	642502598-642513259
GL835516.1	Chr1_supercontig_000001104	642513260-642538196	642513260-642538196
GL835517.1	Chr1_supercontig_000001105	642538197-642574984	642538197-642574984
GL835518.1	Chr1_supercontig_000001106	642574985-642613056	642574985-642613056
GL835519.1	Chr1_supercontig_000001107	642613057-642767224	642613057-642767224
GL835520.1	Chr1_supercontig_000001108	642767225-642801298	642767225-642801298
GL835521.1	Chr1_supercontig_000001109	642801299-642869675	642801299-642869675
GL835522.1	Chr1_supercontig_000001110	642869676-642880994	642869676-642880994
GL835523.1	Chr1_supercontig_000001111	642880995-642928685	642880995-642928685
GL835524.1	Chr1_supercontig_000001112	642928686-642969907	642928686-642969907
GL835525.1	Chr1_supercontig_000001113	642969908-642987124	642969908-642987124
GL835526.1	Chr1_supercontig_000001114	642987125-643039570	642987125-643039570
GL835527.1	Chr1_supercontig_000001115	643039571-643114064	643039571-643114064
GL835528.1	Chr1_supercontig_000001116	643114065-643146638	643114065-643146638
GL835529.1	Chr1_supercontig_000001117	643146639-643148623	643146639-643148623
GL835530.1	Chr1_supercontig_000001118	643148624-643170557	643148624-643170557
GL835531.1	Chr1_supercontig_000001119	643170558-643197574	643170558-643197574
GL835532.1	Chr1_supercontig_000001120	643197575-643256566	643197575-643256566
GL835533.1	Chr1_supercontig_000001121	643256567-643333210	643256567-643333210
GL835534.1	Chr1_supercontig_000001122	643333211-643409688	643333211-643409688
GL835535.1	Chr1_supercontig_000001123	643409689-643457841	643409689-643457841
GL835536.1	Chr1_supercontig_000001124	643457842-643632449	643457842-643632449
GL835537.1	Chr1_supercontig_000001125	643632450-643650371	643632450-643650371
GL835538.1	Chr1_supercontig_000001126	643650372-643674505	643650372-643674505
GL835539.1	Chr1_supercontig_000001127	643674506-643761872	643674506-643761872
GL835540.1	Chr1_supercontig_000001128	643761873-643769688	643761873-643769688
GL835541.1	Chr1_supercontig_000001129	643769689-643805565	643769689-643805565
GL835542.1	Chr1_supercontig_000001130	643805566-643848828	643805566-643848828
GL835543.1	Chr1_supercontig_000001131	643848829-643902340	643848829-643902340
GL835544.1	Chr1_supercontig_000001132	643902341-643944741	643902341-643944741
GL835545.1	Chr1_supercontig_000001133	643944742-643975062	643944742-643975062
GL835546.1	Chr1_supercontig_000001134	643975063-644000603	643975063-644000603
GL835547.1	Chr1_supercontig_000001135	644000604-644033965	644000604-644033965
GL835548.1	Chr1_supercontig_000001136	644033966-644036833	644033966-644036833
GL835549.1	Chr1_supercontig_000001137	644036834-644110434	644036834-644110434
GL835550.1	Chr1_supercontig_000001138	644110435-644168758	644110435-644168758
GL835551.1	Chr1_supercontig_000001139	644168759-644179245	644168759-644179245
GL835552.1	Chr1_supercontig_000001140	644179246-644205052	644179246-644205052
GL835553.1	Chr1_supercontig_000001141	644205053-644225705	644205053-644225705
GL835554.1	Chr1_supercontig_000001142	644225706-644242763	644225706-644242763
GL835555.1	Chr1_supercontig_000001143	644242764-644284459	644242764-644284459
GL835556.1	Chr1_supercontig_000001144	644284460-644322242	644284460-644322242
GL835557.1	Chr1_supercontig_000001145	644322243-644434605	644322243-644434605
GL835558.1	Chr1_supercontig_000001146	644434606-644450910	644434606-644450910
GL835559.1	Chr1_supercontig_000001147	644450911-644604980	644450911-644604980
GL835560.1	Chr1_supercontig_000001148	644604981-644640038	644604981-644640038
GL835561.1	Chr1_supercontig_000001149	644640039-644747048	644640039-644747048
GL835562.1	Chr1_supercontig_000001150	644747049-644755509	644747049-644755509
GL835563.1	Chr1_supercontig_000001151	644755510-644822756	644755510-644822756
GL835564.1	Chr1_supercontig_000001152	644822757-644842526	644822757-644842526
GL835565.1	Chr1_supercontig_000001153	644842527-644906535	644842527-644906535
GL835566.1	Chr1_supercontig_000001154	644906536-644955679	644906536-644955679
GL835567.1	Chr1_supercontig_000001155	644955680-644999703	644955680-644999703
GL835568.1	Chr1_supercontig_000001156	644999704-645018124	644999704-645018124
GL835569.1	Chr1_supercontig_000001157	645018125-645031479	645018125-645031479
GL835570.1	Chr1_supercontig_000001158	645031480-645087377	645031480-645087377
GL835571.1	Chr1_supercontig_000001159	645087378-645112116	645087378-645112116
GL835572.1	Chr1_supercontig_000001160	645112117-645170387	645112117-645170387
GL835573.1	Chr1_supercontig_000001161	645170388-645178472	645170388-645178472
GL835574.1	Chr1_supercontig_000001162	645178473-645214180	645178473-645214180
GL835575.1	Chr1_supercontig_000001163	645214181-645227926	645214181-645227926
GL835576.1	Chr1_supercontig_000001164	645227927-645437406	645227927-645437406
GL835577.1	Chr1_supercontig_000001165	645437407-645511313	645437407-645511313
GL835578.1	Chr1_supercontig_000001166	645511314-645563038	645511314-645563038
GL835579.1	Chr1_supercontig_000001167	645563039-645597289	645563039-645597289
GL835580.1	Chr1_supercontig_000001168	645597290-645607714	645597290-645607714
GL835581.1	Chr1_supercontig_000001169	645607715-645678310	645607715-645678310
GL835582.1	Chr1_supercontig_000001170	645678311-645699015	645678311-645699015
GL835583.1	Chr1_supercontig_000001171	645699016-645772281	645699016-645772281
GL835584.1	Chr1_supercontig_000001172	645772282-645781937	645772282-645781937
GL835585.1	Chr1_supercontig_000001173	645781938-645818790	645781938-645818790
GL835586.1	Chr1_supercontig_000001174	645818791-645841725	645818791-645841725
GL835587.1	Chr1_supercontig_000001175	645841726-645879017	645841726-645879017
GL835588.1	Chr1_supercontig_000001176	645879018-645923687	645879018-645923687
GL835589.1	Chr1_supercontig_000001177	645923688-645974650	645923688-645974650
GL835590.1	Chr1_supercontig_000001178	645974651-646003017	645974651-646003017
GL835591.1	Chr1_supercontig_000001179	646003018-646019484	646003018-646019484
GL835592.1	Chr1_supercontig_000001180	646019485-646022056	646019485-646022056
GL835593.1	Chr1_supercontig_000001181	646022057-646106491	646022057-646106491
GL835594.1	Chr1_supercontig_000001182	646106492-646190599	646106492-646190599
GL835595.1	Chr1_supercontig_000001183	646190600-646265766	646190600-646265766
GL835596.1	Chr1_supercontig_000001184	646265767-646349744	646265767-646349744
GL835597.1	Chr1_supercontig_000001185	646349745-646556121	646349745-646556121
GL835598.1	Chr1_supercontig_000001186	646556122-646558695	646556122-646558695
GL835599.1	Chr1_supercontig_000001187	646558696-646603827	646558696-646603827
GL835600.1	Chr1_supercontig_000001188	646603828-646661576	646603828-646661576
GL835601.1	Chr1_supercontig_000001189	646661577-646691433	646661577-646691433
GL835602.1	Chr1_supercontig_000001190	646691434-646825647	646691434-646825647
GL835603.1	Chr1_supercontig_000001191	646825648-646843134	646825648-646843134
GL835604.1	Chr1_supercontig_000001192	646843135-646878820	646843135-646878820
GL835605.1	Chr1_supercontig_000001193	646878821-646916324	646878821-646916324
GL835606.1	Chr1_supercontig_000001194	646916325-646932823	646916325-646932823
GL835607.1	Chr1_supercontig_000001195	646932824-646965661	646932824-646965661
GL835608.1	Chr1_supercontig_000001196	646965662-647024495	646965662-647024495
GL835609.1	Chr1_supercontig_000001197	647024496-647036041	647024496-647036041
GL835610.1	Chr1_supercontig_000001198	647036042-647106083	647036042-647106083
GL835611.1	Chr1_supercontig_000001199	647106084-647139640	647106084-647139640
GL835612.1	Chr1_supercontig_000001200	647139641-647168391	647139641-647168391
GL835613.1	Chr1_supercontig_000001201	647168392-647200038	647168392-647200038
GL835614.1	Chr1_supercontig_000001202	647200039-647276345	647200039-647276345
GL835615.1	Chr1_supercontig_000001203	647276346-647291424	647276346-647291424
GL835616.1	Chr1_supercontig_000001204	647291425-647344766	647291425-647344766
GL835617.1	Chr1_supercontig_000001205	647344767-647363896	647344767-647363896
GL835618.1	Chr1_supercontig_000001206	647363897-647368153	647363897-647368153
GL835619.1	Chr1_supercontig_000001207	647368154-647391359	647368154-647391359
GL835620.1	Chr1_supercontig_000001208	647391360-647402467	647391360-647402467
GL835621.1	Chr1_supercontig_000001209	647402468-647460586	647402468-647460586
GL835622.1	Chr1_supercontig_000001210	647460587-647534690	647460587-647534690
GL835623.1	Chr1_supercontig_000001211	647534691-647558966	647534691-647558966
GL835624.1	Chr1_supercontig_000001212	647558967-647590945	647558967-647590945
GL835625.1	Chr1_supercontig_000001213	647590946-647624764	647590946-647624764
GL835626.1	Chr1_supercontig_000001214	647624765-647660735	647624765-647660735
GL835627.1	Chr1_supercontig_000001215	647660736-647704963	647660736-647704963
GL835628.1	Chr1_supercontig_000001216	647704964-647732258	647704964-647732258
GL835629.1	Chr1_supercontig_000001217	647732259-647766509	647732259-647766509
GL835630.1	Chr1_supercontig_000001218	647766510-647812318	647766510-647812318
GL835631.1	Chr1_supercontig_000001219	647812319-647829427	647812319-647829427
GL835632.1	Chr1_supercontig_000001220	647829428-647872150	647829428-647872150
GL835633.1	Chr1_supercontig_000001221	647872151-647903035	647872151-647903035
GL835634.1	Chr1_supercontig_000001222	647903036-647931547	647903036-647931547
GL835635.1	Chr1_supercontig_000001223	647931548-648003044	647931548-648003044
GL835636.1	Chr1_supercontig_000001224	648003045-648077084	648003045-648077084
GL835637.1	Chr1_supercontig_000001225	648077085-648123039	648077085-648123039
GL835638.1	Chr1_supercontig_000001226	648123040-648137744	648123040-648137744
GL835639.1	Chr1_supercontig_000001227	648137745-648175892	648137745-648175892
GL835640.1	Chr1_supercontig_000001228	648175893-648206720	648175893-648206720
GL835641.1	Chr1_supercontig_000001229	648206721-648226890	648206721-648226890
GL835642.1	Chr1_supercontig_000001230	648226891-648255431	648226891-648255431
GL835643.1	Chr1_supercontig_000001231	648255432-648294698	648255432-648294698
GL835644.1	Chr1_supercontig_000001232	648294699-648402685	648294699-648402685
GL835645.1	Chr1_supercontig_000001233	648402686-648437387	648402686-648437387
GL835646.1	Chr1_supercontig_000001234	648437388-648495137	648437388-648495137
GL835647.1	Chr1_supercontig_000001235	648495138-648519345	648495138-648519345
GL835648.1	Chr1_supercontig_000001236	648519346-648560933	648519346-648560933
GL835649.1	Chr1_supercontig_000001237	648560934-648576377	648560934-648576377
GL835650.1	Chr1_supercontig_000001238	648576378-648726959	648576378-648726959
GL835651.1	Chr1_supercontig_000001239	648726960-648738710	648726960-648738710
GL835652.1	Chr1_supercontig_000001240	648738711-648825229	648738711-648825229
GL835653.1	Chr1_supercontig_000001241	648825230-648878149	648825230-648878149
GL835654.1	Chr1_supercontig_000001242	648878150-648910934	648878150-648910934
GL835655.1	Chr1_supercontig_000001243	648910935-648946511	648910935-648946511
GL835656.1	Chr1_supercontig_000001244	648946512-649003241	648946512-649003241
GL835657.1	Chr1_supercontig_000001245	649003242-649053650	649003242-649053650
GL835658.1	Chr1_supercontig_000001246	649053651-649152846	649053651-649152846
GL835659.1	Chr1_supercontig_000001247	649152847-649166742	649152847-649166742
GL835660.1	Chr1_supercontig_000001248	649166743-649197601	649166743-649197601
GL835661.1	Chr1_supercontig_000001249	649197602-649258522	649197602-649258522
GL835662.1	Chr1_supercontig_000001250	649258523-649291988	649258523-649291988
GL835663.1	Chr1_supercontig_000001251	649291989-649394814	649291989-649394814
GL835664.1	Chr1_supercontig_000001252	649394815-649432142	649394815-649432142
GL835665.1	Chr1_supercontig_000001253	649432143-649466656	649432143-649466656
GL835666.1	Chr1_supercontig_000001254	649466657-649527981	649466657-649527981
GL835667.1	Chr1_supercontig_000001255	649527982-649554358	649527982-649554358
GL835668.1	Chr1_supercontig_000001256	649554359-649579286	649554359-649579286
GL835669.1	Chr1_supercontig_000001257	649579287-649628088	649579287-649628088
GL835670.1	Chr1_supercontig_000001258	649628089-649675823	649628089-649675823
GL835671.1	Chr1_supercontig_000001259	649675824-649726585	649675824-649726585
GL835672.1	Chr1_supercontig_000001260	649726586-649741871	649726586-649741871
GL835673.1	Chr1_supercontig_000001261	649741872-649893624	649741872-649893624
GL835674.1	Chr1_supercontig_000001262	649893625-649937657	649893625-649937657
GL835675.1	Chr1_supercontig_000001263	649937658-649957679	649937658-649957679
GL835676.1	Chr1_supercontig_000001264	649957680-649961350	649957680-649961350
GL835677.1	Chr1_supercontig_000001265	649961351-650020518	649961351-650020518
GL835678.1	Chr1_supercontig_000001266	650020519-650078020	650020519-650078020
GL835679.1	Chr1_supercontig_000001267	650078021-650098607	650078021-650098607
GL835680.1	Chr1_supercontig_000001268	650098608-650141812	650098608-650141812
GL835681.1	Chr1_supercontig_000001269	650141813-650161850	650141813-650161850
GL835682.1	Chr1_supercontig_000001270	650161851-650165194	650161851-650165194
GL835683.1	Chr1_supercontig_000001271	650165195-650190971	650165195-650190971
GL835684.1	Chr1_supercontig_000001272	650190972-650210767	650190972-650210767
GL835685.1	Chr1_supercontig_000001273	650210768-650274204	650210768-650274204
GL835686.1	Chr1_supercontig_000001274	650274205-650322132	650274205-650322132
GL835687.1	Chr1_supercontig_000001275	650322133-650349028	650322133-650349028
GL835688.1	Chr1_supercontig_000001276	650349029-650371614	650349029-650371614
GL835689.1	Chr1_supercontig_000001277	650371615-650425572	650371615-650425572
GL835690.1	Chr1_supercontig_000001278	650425573-650450070	650425573-650450070
GL835691.1	Chr1_supercontig_000001279	650450071-650488453	650450071-650488453
GL835692.1	Chr1_supercontig_000001280	650488454-650522483	650488454-650522483
GL835693.1	Chr1_supercontig_000001281	650522484-650545994	650522484-650545994
GL835694.1	Chr1_supercontig_000001282	650545995-650602048	650545995-650602048
GL835695.1	Chr1_supercontig_000001283	650602049-650656967	650602049-650656967
GL835696.1	Chr1_supercontig_000001284	650656968-650668841	650656968-650668841
GL835697.1	Chr1_supercontig_000001285	650668842-650721568	650668842-650721568
GL835698.1	Chr1_supercontig_000001286	650721569-650748072	650721569-650748072
GL835699.1	Chr1_supercontig_000001287	650748073-650827706	650748073-650827706
GL835700.1	Chr1_supercontig_000001288	650827707-650845757	650827707-650845757
GL835701.1	Chr1_supercontig_000001289	650845758-650868859	650845758-650868859
GL835702.1	Chr1_supercontig_000001290	650868860-650938375	650868860-650938375
GL835703.1	Chr1_supercontig_000001291	650938376-650981614	650938376-650981614
GL835704.1	Chr1_supercontig_000001292	650981615-651002096	650981615-651002096
GL835705.1	Chr1_supercontig_000001293	651002097-651073278	651002097-651073278
GL835706.1	Chr1_supercontig_000001294	651073279-651156869	651073279-651156869
GL835707.1	Chr1_supercontig_000001295	651156870-651245812	651156870-651245812
GL835708.1	Chr1_supercontig_000001296	651245813-651256688	651245813-651256688
GL835709.1	Chr1_supercontig_000001297	651256689-651277914	651256689-651277914
GL835710.1	Chr1_supercontig_000001298	651277915-651295802	651277915-651295802
GL835711.1	Chr1_supercontig_000001299	651295803-651320363	651295803-651320363
GL835712.1	Chr1_supercontig_000001300	651320364-651369850	651320364-651369850
GL835713.1	Chr1_supercontig_000001301	651369851-651432448	651369851-651432448
GL835714.1	Chr1_supercontig_000001302	651432449-651501954	651432449-651501954
GL835715.1	Chr1_supercontig_000001303	651501955-651523502	651501955-651523502
GL835716.1	Chr1_supercontig_000001304	651523503-651618724	651523503-651618724
GL835717.1	Chr1_supercontig_000001305	651618725-651666838	651618725-651666838
GL835718.1	Chr1_supercontig_000001306	651666839-651700526	651666839-651700526
GL835719.1	Chr1_supercontig_000001307	651700527-651929923	651700527-651929923
GL835720.1	Chr1_supercontig_000001308	651929924-651946857	651929924-651946857
GL835721.1	Chr1_supercontig_000001309	651946858-651959018	651946858-651959018
GL835722.1	Chr1_supercontig_000001310	651959019-651980458	651959019-651980458
GL835723.1	Chr1_supercontig_000001311	651980459-652062241	651980459-652062241
GL835724.1	Chr1_supercontig_000001312	652062242-652095343	652062242-652095343
GL835725.1	Chr1_supercontig_000001313	652095344-652099552	652095344-652099552
GL835726.1	Chr1_supercontig_000001314	652099553-652123322	652099553-652123322
GL835727.1	Chr1_supercontig_000001315	652123323-652155524	652123323-652155524
GL835728.1	Chr1_supercontig_000001316	652155525-652182385	652155525-652182385
GL835729.1	Chr1_supercontig_000001317	652182386-652257720	652182386-652257720
GL835730.1	Chr1_supercontig_000001318	652257721-652279083	652257721-652279083
GL835731.1	Chr1_supercontig_000001319	652279084-652369677	652279084-652369677
GL835732.1	Chr1_supercontig_000001320	652369678-652403974	652369678-652403974
GL835733.1	Chr1_supercontig_000001321	652403975-652421345	652403975-652421345
GL835734.1	Chr1_supercontig_000001322	652421346-652453178	652421346-652453178
GL835735.1	Chr1_supercontig_000001323	652453179-652473720	652453179-652473720
GL835736.1	Chr1_supercontig_000001324	652473721-652521950	652473721-652521950
GL835737.1	Chr1_supercontig_000001325	652521951-652547783	652521951-652547783
GL835738.1	Chr1_supercontig_000001326	652547784-652587143	652547784-652587143
GL835739.1	Chr1_supercontig_000001327	652587144-652619940	652587144-652619940
GL835740.1	Chr1_supercontig_000001328	652619941-652658011	652619941-652658011
GL835741.1	Chr1_supercontig_000001329	652658012-652689910	652658012-652689910
GL835742.1	Chr1_supercontig_000001330	652689911-652713563	652689911-652713563
GL835743.1	Chr1_supercontig_000001331	652713564-652765615	652713564-652765615
GL835744.1	Chr1_supercontig_000001332	652765616-652817528	652765616-652817528
GL835745.1	Chr1_supercontig_000001333	652817529-652843213	652817529-652843213
GL835746.1	Chr1_supercontig_000001334	652843214-652867142	652843214-652867142
GL835747.1	Chr1_supercontig_000001335	652867143-652923784	652867143-652923784
GL835748.1	Chr1_supercontig_000001336	652923785-652984079	652923785-652984079
GL835749.1	Chr1_supercontig_000001337	652984080-652985133	652984080-652985133
GL835750.1	Chr1_supercontig_000001338	652985134-653012627	652985134-653012627
GL835751.1	Chr1_supercontig_000001339	653012628-653032646	653012628-653032646
GL835752.1	Chr1_supercontig_000001340	653032647-653079106	653032647-653079106
GL835753.1	Chr1_supercontig_000001341	653079107-653096924	653079107-653096924
GL835754.1	Chr1_supercontig_000001342	653096925-653101001	653096925-653101001
GL835755.1	Chr1_supercontig_000001343	653101002-653113642	653101002-653113642
GL835756.1	Chr1_supercontig_000001344	653113643-653132639	653113643-653132639
GL835757.1	Chr1_supercontig_000001345	653132640-653165594	653132640-653165594
GL835758.1	Chr1_supercontig_000001346	653165595-653185939	653165595-653185939
GL835759.1	Chr1_supercontig_000001347	653185940-653240371	653185940-653240371
GL835760.1	Chr1_supercontig_000001348	653240372-653380229	653240372-653380229
GL835761.1	Chr1_supercontig_000001349	653380230-653405343	653380230-653405343
GL835762.1	Chr1_supercontig_000001350	653405344-653431907	653405344-653431907
GL835763.1	Chr1_supercontig_000001351	653431908-653539991	653431908-653539991
GL835764.1	Chr1_supercontig_000001352	653539992-653552250	653539992-653552250
GL835765.1	Chr1_supercontig_000001353	653552251-653561995	653552251-653561995
GL835766.1	Chr1_supercontig_000001354	653561996-653568474	653561996-653568474
GL835767.1	Chr1_supercontig_000001355	653568475-653657284	653568475-653657284
GL835768.1	Chr1_supercontig_000001356	653657285-653711412	653657285-653711412
GL835769.1	Chr1_supercontig_000001357	653711413-653755557	653711413-653755557
GL835770.1	Chr1_supercontig_000001358	653755558-653757793	653755558-653757793
GL835771.1	Chr1_supercontig_000001359	653757794-653766563	653757794-653766563
GL835772.1	Chr1_supercontig_000001360	653766564-653806860	653766564-653806860
GL835773.1	Chr1_supercontig_000001361	653806861-653890643	653806861-653890643
GL835774.1	Chr1_supercontig_000001362	653890644-653921477	653890644-653921477
GL835775.1	Chr1_supercontig_000001363	653921478-653965213	653921478-653965213
GL835776.1	Chr1_supercontig_000001364	653965214-653970321	653965214-653970321
GL835777.1	Chr1_supercontig_000001365	653970322-654013282	653970322-654013282
GL835778.1	Chr1_supercontig_000001366	654013283-654015621	654013283-654015621
GL835779.1	Chr1_supercontig_000001367	654015622-654083275	654015622-654083275
GL835780.1	Chr1_supercontig_000001368	654083276-654114220	654083276-654114220
GL835781.1	Chr1_supercontig_000001369	654114221-654204616	654114221-654204616
GL835782.1	Chr1_supercontig_000001370	654204617-654273292	654204617-654273292
GL835783.1	Chr1_supercontig_000001371	654273293-654301554	654273293-654301554
GL835784.1	Chr1_supercontig_000001372	654301555-654388443	654301555-654388443
GL835785.1	Chr1_supercontig_000001373	654388444-654425141	654388444-654425141
GL835786.1	Chr1_supercontig_000001374	654425142-654478914	654425142-654478914
GL835787.1	Chr1_supercontig_000001375	654478915-654555401	654478915-654555401
GL835788.1	Chr1_supercontig_000001376	654555402-654573715	654555402-654573715
GL835789.1	Chr1_supercontig_000001377	654573716-654661126	654573716-654661126
GL835790.1	Chr1_supercontig_000001378	654661127-654712152	654661127-654712152
GL835791.1	Chr1_supercontig_000001379	654712153-654779439	654712153-654779439
GL835792.1	Chr1_supercontig_000001380	654779440-654794997	654779440-654794997
GL835793.1	Chr1_supercontig_000001381	654794998-654838178	654794998-654838178
GL835794.1	Chr1_supercontig_000001382	654838179-654844031	654838179-654844031
GL835795.1	Chr1_supercontig_000001383	654844032-654914235	654844032-654914235
GL835796.1	Chr1_supercontig_000001384	654914236-654931225	654914236-654931225
GL835797.1	Chr1_supercontig_000001385	654931226-654972105	654931226-654972105
GL835798.1	Chr1_supercontig_000001386	654972106-654976663	654972106-654976663
GL835799.1	Chr1_supercontig_000001387	654976664-654995067	654976664-654995067
GL835800.1	Chr1_supercontig_000001388	654995068-655136788	654995068-655136788
GL835801.1	Chr1_supercontig_000001389	655136789-655191247	655136789-655191247
GL835802.1	Chr1_supercontig_000001390	655191248-655266966	655191248-655266966
GL835803.1	Chr1_supercontig_000001391	655266967-655312791	655266967-655312791
GL835804.1	Chr1_supercontig_000001392	655312792-655369752	655312792-655369752
GL835805.1	Chr1_supercontig_000001393	655369753-655427946	655369753-655427946
GL835806.1	Chr1_supercontig_000001394	655427947-655455860	655427947-655455860
GL835807.1	Chr1_supercontig_000001395	655455861-655468869	655455861-655468869
GL835808.1	Chr1_supercontig_000001396	655468870-655516623	655468870-655516623
GL835809.1	Chr1_supercontig_000001397	655516624-655536791	655516624-655536791
GL835810.1	Chr1_supercontig_000001398	655536792-655546058	655536792-655546058
GL835811.1	Chr1_supercontig_000001399	655546059-655573385	655546059-655573385
GL835812.1	Chr1_supercontig_000001400	655573386-655584053	655573386-655584053
GL835813.1	Chr1_supercontig_000001401	655584054-655599684	655584054-655599684
GL835814.1	Chr1_supercontig_000001402	655599685-655647359	655599685-655647359
GL835815.1	Chr1_supercontig_000001403	655647360-655653394	655647360-655653394
GL835816.1	Chr1_supercontig_000001404	655653395-655690547	655653395-655690547
GL835817.1	Chr1_supercontig_000001405	655690548-655703151	655690548-655703151
GL835818.1	Chr1_supercontig_000001406	655703152-655719131	655703152-655719131
GL835819.1	Chr1_supercontig_000001407	655719132-655732659	655719132-655732659
GL835820.1	Chr1_supercontig_000001408	655732660-655822882	655732660-655822882
GL835821.1	Chr1_supercontig_000001409	655822883-655828309	655822883-655828309
GL835822.1	Chr1_supercontig_000001410	655828310-655863659	655828310-655863659
GL835823.1	Chr1_supercontig_000001411	655863660-655886167	655863660-655886167
GL835824.1	Chr1_supercontig_000001412	655886168-655910920	655886168-655910920
GL835825.1	Chr1_supercontig_000001413	655910921-655946069	655910921-655946069
GL835826.1	Chr1_supercontig_000001414	655946070-656006388	655946070-656006388
GL835827.1	Chr1_supercontig_000001415	656006389-656022962	656006389-656022962
GL835828.1	Chr1_supercontig_000001416	656022963-656042784	656022963-656042784
GL835829.1	Chr1_supercontig_000001417	656042785-656089989	656042785-656089989
GL835830.1	Chr1_supercontig_000001418	656089990-656122304	656089990-656122304
GL835831.1	Chr1_supercontig_000001419	656122305-656136723	656122305-656136723
GL835832.1	Chr1_supercontig_000001420	656136724-656153584	656136724-656153584
GL835833.1	Chr1_supercontig_000001421	656153585-656177027	656153585-656177027
GL835834.1	Chr1_supercontig_000001422	656177028-656229861	656177028-656229861
GL835835.1	Chr1_supercontig_000001423	656229862-656265747	656229862-656265747
GL835836.1	Chr1_supercontig_000001424	656265748-656303206	656265748-656303206
GL835837.1	Chr1_supercontig_000001425	656303207-656318467	656303207-656318467
GL835838.1	Chr1_supercontig_000001426	656318468-656351348	656318468-656351348
GL835839.1	Chr1_supercontig_000001427	656351349-656364549	656351349-656364549
GL835840.1	Chr1_supercontig_000001428	656364550-656373123	656364550-656373123
GL835841.1	Chr1_supercontig_000001429	656373124-656393074	656373124-656393074
GL835842.1	Chr1_supercontig_000001430	656393075-656413308	656393075-656413308
GL835843.1	Chr1_supercontig_000001431	656413309-656468909	656413309-656468909
GL835844.1	Chr1_supercontig_000001432	656468910-656482552	656468910-656482552
GL835845.1	Chr1_supercontig_000001433	656482553-656484802	656482553-656484802
GL835846.1	Chr1_supercontig_000001434	656484803-656516612	656484803-656516612
GL835847.1	Chr1_supercontig_000001435	656516613-656551175	656516613-656551175
GL835848.1	Chr1_supercontig_000001436	656551176-656576017	656551176-656576017
GL835849.1	Chr1_supercontig_000001437	656576018-656607598	656576018-656607598
GL835850.1	Chr1_supercontig_000001438	656607599-656634677	656607599-656634677
GL835851.1	Chr1_supercontig_000001439	656634678-656643890	656634678-656643890
GL835852.1	Chr1_supercontig_000001440	656643891-656656198	656643891-656656198
GL835853.1	Chr1_supercontig_000001441	656656199-656698518	656656199-656698518
GL835854.1	Chr1_supercontig_000001442	656698519-656708937	656698519-656708937
GL835855.1	Chr1_supercontig_000001443	656708938-656728107	656708938-656728107
GL835856.1	Chr1_supercontig_000001444	656728108-656775669	656728108-656775669
GL835857.1	Chr1_supercontig_000001445	656775670-656791612	656775670-656791612
GL835858.1	Chr1_supercontig_000001446	656791613-656801554	656791613-656801554
GL835859.1	Chr1_supercontig_000001447	656801555-656836743	656801555-656836743
GL835860.1	Chr1_supercontig_000001448	656836744-656874248	656836744-656874248
GL835861.1	Chr1_supercontig_000001449	656874249-656884990	656874249-656884990
GL835862.1	Chr1_supercontig_000001450	656884991-656897077	656884991-656897077
GL835863.1	Chr1_supercontig_000001451	656897078-656924434	656897078-656924434
GL835864.1	Chr1_supercontig_000001452	656924435-656932653	656924435-656932653
GL835865.1	Chr1_supercontig_000001453	656932654-656952506	656932654-656952506
GL835866.1	Chr1_supercontig_000001454	656952507-656976908	656952507-656976908
GL835867.1	Chr1_supercontig_000001455	656976909-656984585	656976909-656984585
GL835868.1	Chr1_supercontig_000001456	656984586-657027747	656984586-657027747
GL835869.1	Chr1_supercontig_000001457	657027748-657048692	657027748-657048692
GL835870.1	Chr1_supercontig_000001458	657048693-657062146	657048693-657062146
GL835871.1	Chr1_supercontig_000001459	657062147-657084153	657062147-657084153
GL835872.1	Chr1_supercontig_000001460	657084154-657086156	657084154-657086156
GL835873.1	Chr1_supercontig_000001461	657086157-657096276	657086157-657096276
GL835874.1	Chr1_supercontig_000001462	657096277-657129951	657096277-657129951
GL835875.1	Chr1_supercontig_000001463	657129952-657144394	657129952-657144394
GL835876.1	Chr1_supercontig_000001464	657144395-657186421	657144395-657186421
GL835877.1	Chr1_supercontig_000001465	657186422-657234845	657186422-657234845
GL835878.1	Chr1_supercontig_000001466	657234846-657314174	657234846-657314174
GL835879.1	Chr1_supercontig_000001467	657314175-657341101	657314175-657341101
GL835880.1	Chr1_supercontig_000001468	657341102-657351253	657341102-657351253
GL835881.1	Chr1_supercontig_000001469	657351254-657361830	657351254-657361830
GL835882.1	Chr1_supercontig_000001470	657361831-657365580	657361831-657365580
GL835883.1	Chr1_supercontig_000001471	657365581-657381525	657365581-657381525
GL835884.1	Chr1_supercontig_000001472	657381526-657397941	657381526-657397941
GL835885.1	Chr1_supercontig_000001473	657397942-657416978	657397942-657416978
GL835886.1	Chr1_supercontig_000001474	657416979-657423796	657416979-657423796
GL835887.1	Chr1_supercontig_000001475	657423797-657439922	657423797-657439922
GL835888.1	Chr1_supercontig_000001476	657439923-657486126	657439923-657486126
GL835889.1	Chr1_supercontig_000001477	657486127-657517309	657486127-657517309
GL835890.1	Chr1_supercontig_000001478	657517310-657550339	657517310-657550339
GL835891.1	Chr1_supercontig_000001479	657550340-657568055	657550340-657568055
GL835892.1	Chr1_supercontig_000001480	657568056-657569483	657568056-657569483
GL835893.1	Chr1_supercontig_000001481	657569484-657572235	657569484-657572235
GL835894.1	Chr1_supercontig_000001482	657572236-657588394	657572236-657588394
GL835895.1	Chr1_supercontig_000001483	657588395-657592863	657588395-657592863
GL835896.1	Chr1_supercontig_000001484	657592864-657617367	657592864-657617367
GL835897.1	Chr1_supercontig_000001485	657617368-657628803	657617368-657628803
GL835898.1	Chr1_supercontig_000001486	657628804-657631571	657628804-657631571
GL835899.1	Chr1_supercontig_000001487	657631572-657657881	657631572-657657881
GL835900.1	Chr1_supercontig_000001488	657657882-657712432	657657882-657712432
GL835901.1	Chr1_supercontig_000001489	657712433-657752784	657712433-657752784
GL835902.1	Chr1_supercontig_000001490	657752785-657789506	657752785-657789506
GL835903.1	Chr1_supercontig_000001491	657789507-657805912	657789507-657805912
GL835904.1	Chr1_supercontig_000001492	657805913-657809479	657805913-657809479
GL835905.1	Chr1_supercontig_000001493	657809480-657835246	657809480-657835246
GL835906.1	Chr1_supercontig_000001494	657835247-657859317	657835247-657859317
GL835907.1	Chr1_supercontig_000001495	657859318-657875301	657859318-657875301
GL835908.1	Chr1_supercontig_000001496	657875302-657899294	657875302-657899294
GL835909.1	Chr1_supercontig_000001497	657899295-657918363	657899295-657918363
GL835910.1	Chr1_supercontig_000001498	657918364-657928251	657918364-657928251
GL835911.1	Chr1_supercontig_000001499	657928252-657959512	657928252-657959512
GL835912.1	Chr1_supercontig_000001500	657959513-657982495	657959513-657982495
GL835913.1	Chr1_supercontig_000001501	657982496-658026581	657982496-658026581
GL835914.1	Chr1_supercontig_000001502	658026582-658032630	658026582-658032630
GL835915.1	Chr1_supercontig_000001503	658032631-658068590	658032631-658068590
GL835916.1	Chr1_supercontig_000001504	658068591-658077167	658068591-658077167
GL835917.1	Chr1_supercontig_000001505	658077168-658081017	658077168-658081017
GL835918.1	Chr1_supercontig_000001506	658081018-658106099	658081018-658106099
GL835919.1	Chr1_supercontig_000001507	658106100-658111884	658106100-658111884
GL835920.1	Chr1_supercontig_000001508	658111885-658145130	658111885-658145130
GL835921.1	Chr1_supercontig_000001509	658145131-658166847	658145131-658166847
GL835922.1	Chr1_supercontig_000001510	658166848-658182364	658166848-658182364
GL835923.1	Chr1_supercontig_000001511	658182365-658203061	658182365-658203061
GL835924.1	Chr1_supercontig_000001512	658203062-658218110	658203062-658218110
GL835925.1	Chr1_supercontig_000001513	658218111-658222495	658218111-658222495
GL835926.1	Chr1_supercontig_000001514	658222496-658233274	658222496-658233274
GL835927.1	Chr1_supercontig_000001515	658233275-658250883	658233275-658250883
GL835928.1	Chr1_supercontig_000001516	658250884-658269188	658250884-658269188
GL835929.1	Chr1_supercontig_000001517	658269189-658306830	658269189-658306830
GL835930.1	Chr1_supercontig_000001518	658306831-658315109	658306831-658315109
GL835931.1	Chr1_supercontig_000001519	658315110-658318154	658315110-658318154
GL835932.1	Chr1_supercontig_000001520	658318155-658333170	658318155-658333170
GL835933.1	Chr1_supercontig_000001521	658333171-658377189	658333171-658377189
GL835934.1	Chr1_supercontig_000001522	658377190-658419582	658377190-658419582
GL835935.1	Chr1_supercontig_000001523	658419583-658441868	658419583-658441868
GL835936.1	Chr1_supercontig_000001524	658441869-658445181	658441869-658445181
GL835937.1	Chr1_supercontig_000001525	658445182-658449818	658445182-658449818
GL835938.1	Chr1_supercontig_000001526	658449819-658476454	658449819-658476454
GL835939.1	Chr1_supercontig_000001527	658476455-658488159	658476455-658488159
GL835940.1	Chr1_supercontig_000001528	658488160-658496369	658488160-658496369
GL835941.1	Chr1_supercontig_000001529	658496370-658537650	658496370-658537650
GL835942.1	Chr1_supercontig_000001530	658537651-658549737	658537651-658549737
GL835943.1	Chr1_supercontig_000001531	658549738-658565325	658549738-658565325
GL835944.1	Chr1_supercontig_000001532	658565326-658581914	658565326-658581914
GL835945.1	Chr1_supercontig_000001533	658581915-658594298	658581915-658594298
GL835946.1	Chr1_supercontig_000001534	658594299-658629994	658594299-658629994
GL835947.1	Chr1_supercontig_000001535	658629995-658645693	658629995-658645693
GL835948.1	Chr1_supercontig_000001536	658645694-658665874	658645694-658665874
GL835949.1	Chr1_supercontig_000001537	658665875-658727360	658665875-658727360
GL835950.1	Chr1_supercontig_000001538	658727361-658740098	658727361-658740098
GL835951.1	Chr1_supercontig_000001539	658740099-658761120	658740099-658761120
GL835952.1	Chr1_supercontig_000001540	658761121-658774427	658761121-658774427
GL835953.1	Chr1_supercontig_000001541	658774428-658797284	658774428-658797284
GL835954.1	Chr1_supercontig_000001542	658797285-658817914	658797285-658817914
GL835955.1	Chr1_supercontig_000001543	658817915-658827253	658817915-658827253
GL835956.1	Chr1_supercontig_000001544	658827254-658830259	658827254-658830259
GL835957.1	Chr1_supercontig_000001545	658830260-658849257	658830260-658849257
GL835958.1	Chr1_supercontig_000001546	658849258-658860622	658849258-658860622
GL835959.1	Chr1_supercontig_000001547	658860623-658885949	658860623-658885949
GL835960.1	Chr1_supercontig_000001548	658885950-658887305	658885950-658887305
GL835961.1	Chr1_supercontig_000001549	658887306-658899194	658887306-658899194
GL835962.1	Chr1_supercontig_000001550	658899195-658905769	658899195-658905769
GL835963.1	Chr1_supercontig_000001551	658905770-658939349	658905770-658939349
GL835964.1	Chr1_supercontig_000001552	658939350-658953518	658939350-658953518
GL835965.1	Chr1_supercontig_000001553	658953519-658957623	658953519-658957623
GL835966.1	Chr1_supercontig_000001554	658957624-658973579	658957624-658973579
GL835967.1	Chr1_supercontig_000001555	658973580-658982298	658973580-658982298
GL835968.1	Chr1_supercontig_000001556	658982299-658986322	658982299-658986322
GL835969.1	Chr1_supercontig_000001557	658986323-658991330	658986323-658991330
GL835970.1	Chr1_supercontig_000001558	658991331-659005530	658991331-659005530
GL835971.1	Chr1_supercontig_000001559	659005531-659016694	659005531-659016694
GL835972.1	Chr1_supercontig_000001560	659016695-659030791	659016695-659030791
GL835973.1	Chr1_supercontig_000001561	659030792-659062584	659030792-659062584
GL835974.1	Chr1_supercontig_000001562	659062585-659071620	659062585-659071620
GL835975.1	Chr1_supercontig_000001563	659071621-659072899	659071621-659072899
GL835976.1	Chr1_supercontig_000001564	659072900-659078741	659072900-659078741
GL835977.1	Chr1_supercontig_000001565	659078742-659083273	659078742-659083273
GL835978.1	Chr1_supercontig_000001566	659083274-659087848	659083274-659087848
GL835979.1	Chr1_supercontig_000001567	659087849-659096965	659087849-659096965
GL835980.1	Chr1_supercontig_000001568	659096966-659099317	659096966-659099317
GL835981.1	Chr1_supercontig_000001569	659099318-659117302	659099318-659117302
GL835982.1	Chr1_supercontig_000001570	659117303-659129174	659117303-659129174
GL835983.1	Chr1_supercontig_000001571	659129175-659129970	659129175-659129970
GL835984.1	Chr1_supercontig_000001572	659129971-659136686	659129971-659136686
GL835985.1	Chr1_supercontig_000001573	659136687-659140922	659136687-659140922
GL835986.1	Chr1_supercontig_000001574	659140923-659145610	659140923-659145610
GL835987.1	Chr1_supercontig_000001575	659145611-659150344	659145611-659150344
GL835988.1	Chr1_supercontig_000001576	659150345-659151288	659150345-659151288
GL835989.1	Chr1_supercontig_000001577	659151289-659156652	659151289-659156652
GL835990.1	Chr1_supercontig_000001578	659156653-659158681	659156653-659158681
GL835991.1	Chr1_supercontig_000001579	659158682-659161112	659158682-659161112
GL835992.1	Chr1_supercontig_000001580	659161113-659163297	659161113-659163297
GL835993.1	Chr1_supercontig_000001581	659163298-659163957	659163298-659163957
GL835994.1	Chr1_supercontig_000001582	659163958-659166178	659163958-659166178
GL835995.1	Chr1_supercontig_000001583	659166179-659171031	659166179-659171031
GL835996.1	Chr1_supercontig_000001584	659171032-659173124	659171032-659173124
GL835997.1	Chr1_supercontig_000001585	659173125-659174973	659173125-659174973
GL835998.1	Chr1_supercontig_000001586	659174974-659176956	659174974-659176956
GL835999.1	Chr1_supercontig_000001587	659176957-659179206	659176957-659179206
GL836000.1	Chr1_supercontig_000001588	659179207-659182136	659179207-659182136
GL836001.1	Chr1_supercontig_000001589	659182137-659183691	659182137-659183691
GL836002.1	Chr1_supercontig_000001590	659183692-659185278	659183692-659185278
GL836003.1	Chr1_supercontig_000001591	659185279-659186860	659185279-659186860
GL836004.1	Chr1_supercontig_000001592	659186861-659190068	659186861-659190068
GL836005.1	Chr1_supercontig_000001593	659190069-659191833	659190069-659191833
GL836006.1	Chr1_supercontig_000001594	659191834-659194790	659191834-659194790
GL836007.1	Chr1_supercontig_000001595	659194791-659198435	659194791-659198435
GL836008.1	Chr1_supercontig_000001596	659198436-659200843	659198436-659200843
GL836009.1	Chr1_supercontig_000001597	659200844-659202516	659200844-659202516
GL836010.1	Chr1_supercontig_000001598	659202517-659204083	659202517-659204083
GL836011.1	Chr1_supercontig_000001599	659204084-659205687	659204084-659205687
GL836012.1	Chr1_supercontig_000001600	659205688-659209801	659205688-659209801
GL836013.1	Chr1_supercontig_000001601	659209802-659211506	659209802-659211506
GL836014.1	Chr1_supercontig_000001602	659211507-659213720	659211507-659213720
GL836015.1	Chr1_supercontig_000001603	659213721-659215509	659213721-659215509
GL836016.1	Chr1_supercontig_000001604	659215510-659217181	659215510-659217181
GL836017.1	Chr1_supercontig_000001605	659217182-659220071	659217182-659220071
GL836018.1	Chr1_supercontig_000001606	659220072-659221637	659220072-659221637
GL836019.1	Chr1_supercontig_000001607	659221638-659223632	659221638-659223632
GL836020.1	Chr1_supercontig_000001608	659223633-659225291	659223633-659225291
GL836021.1	Chr1_supercontig_000001609	659225292-659227223	659225292-659227223
GL836022.1	Chr1_supercontig_000001610	659227224-659229271	659227224-659229271
GL836023.1	Chr1_supercontig_000001611	659229272-659232362	659229272-659232362
GL836024.1	Chr1_supercontig_000001612	659232363-659235418	659232363-659235418
GL836025.1	Chr1_supercontig_000001613	659235419-659236934	659235419-659236934
GL836026.1	Chr1_supercontig_000001614	659236935-659238973	659236935-659238973
GL836027.1	Chr1_supercontig_000001615	659238974-659250865	659238974-659250865
GL836028.1	Chr1_supercontig_000001616	659250866-659252997	659250866-659252997
GL836029.1	Chr1_supercontig_000001617	659252998-659255457	659252998-659255457
GL836030.1	Chr1_supercontig_000001618	659255458-659258132	659255458-659258132
GL836031.1	Chr1_supercontig_000001619	659258133-659261084	659258133-659261084
GL836032.1	Chr1_supercontig_000001620	659261085-659262696	659261085-659262696
GL836033.1	Chr1_supercontig_000001621	659262697-659265984	659262697-659265984
GL836034.1	Chr1_supercontig_000001622	659265985-659272390	659265985-659272390
GL836035.1	Chr1_supercontig_000001623	659272391-659276156	659272391-659276156
GL836036.1	Chr1_supercontig_000001624	659276157-659279057	659276157-659279057
GL836037.1	Chr1_supercontig_000001625	659279058-659280638	659279058-659280638
GL836038.1	Chr1_supercontig_000001626	659280639-659282760	659280639-659282760
GL836039.1	Chr1_supercontig_000001627	659282761-659285153	659282761-659285153
GL836040.1	Chr1_supercontig_000001628	659285154-659287479	659285154-659287479
GL836041.1	Chr1_supercontig_000001629	659287480-659289181	659287480-659289181
GL836042.1	Chr1_supercontig_000001630	659289182-659291916	659289182-659291916
GL836043.1	Chr1_supercontig_000001631	659291917-659293799	659291917-659293799
GL836044.1	Chr1_supercontig_000001632	659293800-659296124	659293800-659296124
GL836045.1	Chr1_supercontig_000001633	659296125-659297846	659296125-659297846
GL836046.1	Chr1_supercontig_000001634	659297847-659300063	659297847-659300063
GL836047.1	Chr1_supercontig_000001635	659300064-659325665	659300064-659325665
GL836048.1	Chr1_supercontig_000001636	659325666-659327588	659325666-659327588
GL836049.1	Chr1_supercontig_000001637	659327589-659332584	659327589-659332584
GL836050.1	Chr1_supercontig_000001638	659332585-659355421	659332585-659355421
GL836051.1	Chr1_supercontig_000001639	659355422-659360028	659355422-659360028
GL836052.1	Chr1_supercontig_000001640	659360029-659362599	659360029-659362599
GL836053.1	Chr1_supercontig_000001641	659362600-659370174	659362600-659370174
GL836054.1	Chr1_supercontig_000001642	659370175-659373271	659370175-659373271
GL836055.1	Chr1_supercontig_000001643	659373272-659375873	659373272-659375873
GL836056.1	Chr1_supercontig_000001644	659375874-659377555	659375874-659377555
GL836057.1	Chr1_supercontig_000001645	659377556-659379161	659377556-659379161
GL836058.1	Chr1_supercontig_000001646	659379162-659380879	659379162-659380879
GL836059.1	Chr1_supercontig_000001647	659380880-659383631	659380880-659383631
GL836060.1	Chr1_supercontig_000001648	659383632-659385584	659383632-659385584
GL836061.1	Chr1_supercontig_000001649	659385585-659388613	659385585-659388613
GL836062.1	Chr1_supercontig_000001650	659388614-659398812	659388614-659398812
GL836063.1	Chr1_supercontig_000001651	659398813-659400917	659398813-659400917
GL836064.1	Chr1_supercontig_000001652	659400918-659402681	659400918-659402681
GL836065.1	Chr1_supercontig_000001653	659402682-659404471	659402682-659404471
GL836066.1	Chr1_supercontig_000001654	659404472-659405976	659404472-659405976
GL836067.1	Chr1_supercontig_000001655	659405977-659407609	659405977-659407609
GL836068.1	Chr1_supercontig_000001656	659407610-659409915	659407610-659409915
GL836069.1	Chr1_supercontig_000001657	659409916-659413765	659409916-659413765
GL836070.1	Chr1_supercontig_000001658	659413766-659418085	659413766-659418085
GL836071.1	Chr1_supercontig_000001659	659418086-659419629	659418086-659419629
GL836072.1	Chr1_supercontig_000001660	659419630-659421293	659419630-659421293
GL836073.1	Chr1_supercontig_000001661	659421294-659422845	659421294-659422845
GL836074.1	Chr1_supercontig_000001662	659422846-659424433	659422846-659424433
GL836075.1	Chr1_supercontig_000001663	659424434-659429021	659424434-659429021
GL836076.1	Chr1_supercontig_000001664	659429022-659430756	659429022-659430756
GL836077.1	Chr1_supercontig_000001665	659430757-659435602	659430757-659435602
GL836078.1	Chr1_supercontig_000001666	659435603-659437249	659435603-659437249
GL836079.1	Chr1_supercontig_000001667	659437250-659438927	659437250-659438927
GL836080.1	Chr1_supercontig_000001668	659438928-659440624	659438928-659440624
GL836081.1	Chr1_supercontig_000001669	659440625-659444451	659440625-659444451
GL836082.1	Chr1_supercontig_000001670	659444452-659448816	659444452-659448816
GL836083.1	Chr1_supercontig_000001671	659448817-659450458	659448817-659450458
GL836084.1	Chr1_supercontig_000001672	659450459-659452941	659450459-659452941
GL836085.1	Chr1_supercontig_000001673	659452942-659454697	659452942-659454697
GL836086.1	Chr1_supercontig_000001674	659454698-659456210	659454698-659456210
GL836087.1	Chr1_supercontig_000001675	659456211-659465696	659456211-659465696
GL836088.1	Chr1_supercontig_000001676	659465697-659467336	659465697-659467336
GL836089.1	Chr1_supercontig_000001677	659467337-659469330	659467337-659469330
GL836090.1	Chr1_supercontig_000001678	659469331-659475160	659469331-659475160
GL836091.1	Chr1_supercontig_000001679	659475161-659477088	659475161-659477088
GL836092.1	Chr1_supercontig_000001680	659477089-659478995	659477089-659478995
GL836093.1	Chr1_supercontig_000001681	659478996-659480614	659478996-659480614
GL836094.1	Chr1_supercontig_000001682	659480615-659482619	659480615-659482619
GL836095.1	Chr1_supercontig_000001683	659482620-659484427	659482620-659484427
GL836096.1	Chr1_supercontig_000001684	659484428-659486125	659484428-659486125
GL836097.1	Chr1_supercontig_000001685	659486126-659489412	659486126-659489412
GL836098.1	Chr1_supercontig_000001686	659489413-659491054	659489413-659491054
GL836099.1	Chr1_supercontig_000001687	659491055-659493484	659491055-659493484
GL836100.1	Chr1_supercontig_000001688	659493485-659495274	659493485-659495274
GL836101.1	Chr1_supercontig_000001689	659495275-659498001	659495275-659498001
GL836102.1	Chr1_supercontig_000001690	659498002-659499717	659498002-659499717
GL836103.1	Chr1_supercontig_000001691	659499718-659503211	659499718-659503211
GL836104.1	Chr1_supercontig_000001692	659503212-659504973	659503212-659504973
GL836105.1	Chr1_supercontig_000001693	659504974-659506658	659504974-659506658
GL836106.1	Chr1_supercontig_000001694	659506659-659517888	659506659-659517888
GL836107.1	Chr1_supercontig_000001695	659517889-659519440	659517889-659519440
GL836108.1	Chr1_supercontig_000001696	659519441-659522934	659519441-659522934
GL836109.1	Chr1_supercontig_000001697	659522935-659548057	659522935-659548057
GL836110.1	Chr1_supercontig_000001698	659548058-659549805	659548058-659549805
GL836111.1	Chr1_supercontig_000001699	659549806-659558261	659549806-659558261
GL836112.1	Chr1_supercontig_000001700	659558262-659562486	659558262-659562486
GL836113.1	Chr1_supercontig_000001701	659562487-659571846	659562487-659571846
GL836114.1	Chr1_supercontig_000001702	659571847-659574047	659571847-659574047
GL836115.1	Chr1_supercontig_000001703	659574048-659575920	659574048-659575920
GL836116.1	Chr1_supercontig_000001704	659575921-659579480	659575921-659579480
GL836117.1	Chr1_supercontig_000001705	659579481-659581143	659579481-659581143
GL836118.1	Chr1_supercontig_000001706	659581144-659583062	659581144-659583062
GL836119.1	Chr1_supercontig_000001707	659583063-659586563	659583063-659586563
GL836120.1	Chr1_supercontig_000001708	659586564-659588837	659586564-659588837
GL836121.1	Chr1_supercontig_000001709	659588838-659591272	659588838-659591272
GL836122.1	Chr1_supercontig_000001710	659591273-659593403	659591273-659593403
GL836123.1	Chr1_supercontig_000001711	659593404-659597447	659593404-659597447
GL836124.1	Chr1_supercontig_000001712	659597448-659601322	659597448-659601322
GL836125.1	Chr1_supercontig_000001713	659601323-659603560	659601323-659603560
GL836126.1	Chr1_supercontig_000001714	659603561-659619717	659603561-659619717
GL836127.1	Chr1_supercontig_000001715	659619718-659641919	659619718-659641919
GL836128.1	Chr1_supercontig_000001716	659641920-659646152	659641920-659646152
GL836129.1	Chr1_supercontig_000001717	659646153-659648950	659646153-659648950
GL836130.1	Chr1_supercontig_000001718	659648951-659651121	659648951-659651121
GL836131.1	Chr1_supercontig_000001719	659651122-659653212	659651122-659653212
GL836132.1	Chr1_supercontig_000001720	659653213-659655081	659653213-659655081
GL836133.1	Chr1_supercontig_000001721	659655082-659656783	659655082-659656783
GL836134.1	Chr1_supercontig_000001722	659656784-659659025	659656784-659659025
GL836135.1	Chr1_supercontig_000001723	659659026-659660916	659659026-659660916
GL836136.1	Chr1_supercontig_000001724	659660917-659662777	659660917-659662777
GL836137.1	Chr1_supercontig_000001725	659662778-659664383	659662778-659664383
GL836138.1	Chr1_supercontig_000001726	659664384-659666568	659664384-659666568
GL836139.1	Chr1_supercontig_000001727	659666569-659669406	659666569-659669406
GL836140.1	Chr1_supercontig_000001728	659669407-659672215	659669407-659672215
GL836141.1	Chr1_supercontig_000001729	659672216-659706273	659672216-659706273
GL836142.1	Chr1_supercontig_000001730	659706274-659708519	659706274-659708519
GL836143.1	Chr1_supercontig_000001731	659708520-659726696	659708520-659726696
GL836144.1	Chr1_supercontig_000001732	659726697-659729308	659726697-659729308
GL836145.1	Chr1_supercontig_000001733	659729309-659734024	659729309-659734024
GL836146.1	Chr1_supercontig_000001734	659734025-659745931	659734025-659745931
GL836147.1	Chr1_supercontig_000001735	659745932-659750386	659745932-659750386
GL836148.1	Chr1_supercontig_000001736	659750387-659751991	659750387-659751991
GL836149.1	Chr1_supercontig_000001737	659751992-659758419	659751992-659758419
GL836150.1	Chr1_supercontig_000001738	659758420-659760820	659758420-659760820
GL836151.1	Chr1_supercontig_000001739	659760821-659762783	659760821-659762783
GL836152.1	Chr1_supercontig_000001740	659762784-659765230	659762784-659765230
GL836153.1	Chr1_supercontig_000001741	659765231-659767974	659765231-659767974
GL836154.1	Chr1_supercontig_000001742	659767975-659769699	659767975-659769699
GL836155.1	Chr1_supercontig_000001743	659769700-659773783	659769700-659773783
GL836156.1	Chr1_supercontig_000001744	659773784-659775302	659773784-659775302
GL836157.1	Chr1_supercontig_000001745	659775303-659787247	659775303-659787247
GL836158.1	Chr1_supercontig_000001746	659787248-659792637	659787248-659792637
GL836159.1	Chr1_supercontig_000001747	659792638-659828765	659792638-659828765
GL836160.1	Chr1_supercontig_000001748	659828766-659831350	659828766-659831350
GL836161.1	Chr1_supercontig_000001749	659831351-659833875	659831351-659833875
GL836162.1	Chr1_supercontig_000001750	659833876-659836008	659833876-659836008
GL836163.1	Chr1_supercontig_000001751	659836009-659845831	659836009-659845831
GL836164.1	Chr1_supercontig_000001752	659845832-659870564	659845832-659870564
GL836165.1	Chr1_supercontig_000001753	659870565-659888133	659870565-659888133
GL836166.1	Chr1_supercontig_000001754	659888134-659890239	659888134-659890239
GL836167.1	Chr1_supercontig_000001755	659890240-659891788	659890240-659891788
GL836168.1	Chr1_supercontig_000001756	659891789-659894362	659891789-659894362
GL836169.1	Chr1_supercontig_000001757	659894363-659910836	659894363-659910836
GL836170.1	Chr1_supercontig_000001758	659910837-659916886	659910837-659916886
GL836171.1	Chr1_supercontig_000001759	659916887-659919036	659916887-659919036
GL836172.1	Chr1_supercontig_000001760	659919037-659926461	659919037-659926461
GL836173.1	Chr1_supercontig_000001761	659926462-659931195	659926462-659931195
GL836174.1	Chr1_supercontig_000001762	659931196-659933435	659931196-659933435
GL836175.1	Chr1_supercontig_000001763	659933436-659935156	659933436-659935156
GL836176.1	Chr1_supercontig_000001764	659935157-659936890	659935157-659936890
GL836177.1	Chr1_supercontig_000001765	659936891-659939604	659936891-659939604
GL836178.1	Chr1_supercontig_000001766	659939605-659941691	659939605-659941691
GL836179.1	Chr1_supercontig_000001767	659941692-659943800	659941692-659943800
GL836180.1	Chr1_supercontig_000001768	659943801-659947199	659943801-659947199
GL836181.1	Chr1_supercontig_000001769	659947200-659948931	659947200-659948931
GL836182.1	Chr1_supercontig_000001770	659948932-659951090	659948932-659951090
GL836183.1	Chr1_supercontig_000001771	659951091-659953036	659951091-659953036
GL836184.1	Chr1_supercontig_000001772	659953037-659955371	659953037-659955371
GL836185.1	Chr1_supercontig_000001773	659955372-659957681	659955372-659957681
GL836186.1	Chr1_supercontig_000001774	659957682-659959913	659957682-659959913
GL836187.1	Chr1_supercontig_000001775	659959914-659962908	659959914-659962908
GL836188.1	Chr1_supercontig_000001776	659962909-659965378	659962909-659965378
GL836189.1	Chr1_supercontig_000001777	659965379-659967255	659965379-659967255
GL836190.1	Chr1_supercontig_000001778	659967256-659968796	659967256-659968796
GL836191.1	Chr1_supercontig_000001779	659968797-659986661	659968797-659986661
GL836192.1	Chr1_supercontig_000001780	659986662-660013456	659986662-660013456
GL836193.1	Chr1_supercontig_000001781	660013457-660015077	660013457-660015077
GL836194.1	Chr1_supercontig_000001782	660015078-660017219	660015078-660017219
GL836195.1	Chr1_supercontig_000001783	660017220-660018854	660017220-660018854
GL836196.1	Chr1_supercontig_000001784	660018855-660039135	660018855-660039135
GL836197.1	Chr1_supercontig_000001785	660039136-660040892	660039136-660040892
GL836198.1	Chr1_supercontig_000001786	660040893-660042891	660040893-660042891
GL836199.1	Chr1_supercontig_000001787	660042892-660044818	660042892-660044818
GL836200.1	Chr1_supercontig_000001788	660044819-660048550	660044819-660048550
GL836201.1	Chr1_supercontig_000001789	660048551-660051295	660048551-660051295
GL836202.1	Chr1_supercontig_000001790	660051296-660053240	660051296-660053240
GL836203.1	Chr1_supercontig_000001791	660053241-660055755	660053241-660055755
GL836204.1	Chr1_supercontig_000001792	660055756-660057496	660055756-660057496
GL836205.1	Chr1_supercontig_000001793	660057497-660060553	660057497-660060553
GL836206.1	Chr1_supercontig_000001794	660060554-660062214	660060554-660062214
GL836207.1	Chr1_supercontig_000001795	660062215-660066632	660062215-660066632
GL836208.1	Chr1_supercontig_000001796	660066633-660070105	660066633-660070105
GL836209.1	Chr1_supercontig_000001797	660070106-660072455	660070106-660072455
GL836210.1	Chr1_supercontig_000001798	660072456-660075909	660072456-660075909
GL836211.1	Chr1_supercontig_000001799	660075910-660079785	660075910-660079785
GL836212.1	Chr1_supercontig_000001800	660079786-660090987	660079786-660090987
GL836213.1	Chr1_supercontig_000001801	660090988-660093902	660090988-660093902
GL836214.1	Chr1_supercontig_000001802	660093903-660099735	660093903-660099735
GL836215.1	Chr1_supercontig_000001803	660099736-660102818	660099736-660102818
GL836216.1	Chr1_supercontig_000001804	660102819-660104458	660102819-660104458
GL836217.1	Chr1_supercontig_000001805	660104459-660106823	660104459-660106823
GL836218.1	Chr1_supercontig_000001806	660106824-660111691	660106824-660111691
GL836219.1	Chr1_supercontig_000001807	660111692-660113483	660111692-660113483
GL836220.1	Chr1_supercontig_000001808	660113484-660120440	660113484-660120440
GL836221.1	Chr1_supercontig_000001809	660120441-660129912	660120441-660129912
GL836222.1	Chr1_supercontig_000001810	660129913-660132365	660129913-660132365
GL836223.1	Chr1_supercontig_000001811	660132366-660133993	660132366-660133993
GL836224.1	Chr1_supercontig_000001812	660133994-660135556	660133994-660135556
GL836225.1	Chr1_supercontig_000001813	660135557-660137245	660135557-660137245
GL836226.1	Chr1_supercontig_000001814	660137246-660145494	660137246-660145494
GL836227.1	Chr1_supercontig_000001815	660145495-660147193	660145495-660147193
GL836228.1	Chr1_supercontig_000001816	660147194-660148844	660147194-660148844
GL836229.1	Chr1_supercontig_000001817	660148845-660151570	660148845-660151570
GL836230.1	Chr1_supercontig_000001818	660151571-660154191	660151571-660154191
GL836231.1	Chr1_supercontig_000001819	660154192-660172697	660154192-660172697
GL836232.1	Chr1_supercontig_000001820	660172698-660176738	660172698-660176738
GL836233.1	Chr1_supercontig_000001821	660176739-660181105	660176739-660181105
GL836234.1	Chr1_supercontig_000001822	660181106-660182854	660181106-660182854
GL836235.1	Chr1_supercontig_000001823	660182855-660184623	660182855-660184623
GL836236.1	Chr1_supercontig_000001824	660184624-660188307	660184624-660188307
GL836237.1	Chr1_supercontig_000001825	660188308-660193149	660188308-660193149
GL836238.1	Chr1_supercontig_000001826	660193150-660195875	660193150-660195875
GL836239.1	Chr1_supercontig_000001827	660195876-660201557	660195876-660201557
GL836240.1	Chr1_supercontig_000001828	660201558-660207380	660201558-660207380
GL836241.1	Chr1_supercontig_000001829	660207381-660210874	660207381-660210874
GL836242.1	Chr1_supercontig_000001830	660210875-660212475	660210875-660212475
GL836243.1	Chr1_supercontig_000001831	660212476-660214230	660212476-660214230
GL836244.1	Chr1_supercontig_000001832	660214231-660216183	660214231-660216183
GL836245.1	Chr1_supercontig_000001833	660216184-660218956	660216184-660218956
GL836246.1	Chr1_supercontig_000001834	660218957-660221612	660218957-660221612
GL836247.1	Chr1_supercontig_000001835	660221613-660225287	660221613-660225287
GL836248.1	Chr1_supercontig_000001836	660225288-660227110	660225288-660227110
GL836249.1	Chr1_supercontig_000001837	660227111-660229074	660227111-660229074
GL836250.1	Chr1_supercontig_000001838	660229075-660230734	660229075-660230734
GL836251.1	Chr1_supercontig_000001839	660230735-660235840	660230735-660235840
GL836252.1	Chr1_supercontig_000001840	660235841-660241789	660235841-660241789
GL836253.1	Chr1_supercontig_000001841	660241790-660243938	660241790-660243938
GL836254.1	Chr1_supercontig_000001842	660243939-660245794	660243939-660245794
GL836255.1	Chr1_supercontig_000001843	660245795-660248666	660245795-660248666
GL836256.1	Chr1_supercontig_000001844	660248667-660250602	660248667-660250602
GL836257.1	Chr1_supercontig_000001845	660250603-660252337	660250603-660252337
GL836258.1	Chr1_supercontig_000001846	660252338-660255192	660252338-660255192
GL836259.1	Chr1_supercontig_000001847	660255193-660289426	660255193-660289426
GL836260.1	Chr1_supercontig_000001848	660289427-660304457	660289427-660304457
GL836261.1	Chr1_supercontig_000001849	660304458-660320672	660304458-660320672
GL836262.1	Chr1_supercontig_000001850	660320673-660322893	660320673-660322893
GL836263.1	Chr1_supercontig_000001851	660322894-660331763	660322894-660331763
GL836264.1	Chr1_supercontig_000001852	660331764-660350332	660331764-660350332
GL836265.1	Chr1_supercontig_000001853	660350333-660352084	660350333-660352084
GL836266.1	Chr1_supercontig_000001854	660352085-660359930	660352085-660359930
GL836267.1	Chr1_supercontig_000001855	660359931-660361798	660359931-660361798
GL836268.1	Chr1_supercontig_000001856	660361799-660363901	660361799-660363901
GL836269.1	Chr1_supercontig_000001857	660363902-660365441	660363902-660365441
GL836270.1	Chr1_supercontig_000001858	660365442-660376909	660365442-660376909
GL836271.1	Chr1_supercontig_000001859	660376910-660383913	660376910-660383913
GL836272.1	Chr1_supercontig_000001860	660383914-660396506	660383914-660396506
GL836273.1	Chr1_supercontig_000001861	660396507-660402108	660396507-660402108
GL836274.1	Chr1_supercontig_000001862	660402109-660405602	660402109-660405602
GL836275.1	Chr1_supercontig_000001863	660405603-660408386	660405603-660408386
GL836276.1	Chr1_supercontig_000001864	660408387-660413691	660408387-660413691
GL836277.1	Chr1_supercontig_000001865	660413692-660415818	660413692-660415818
GL836278.1	Chr1_supercontig_000001866	660415819-660417931	660415819-660417931
GL836279.1	Chr1_supercontig_000001867	660417932-660419658	660417932-660419658
GL836280.1	Chr1_supercontig_000001868	660419659-660421638	660419659-660421638
GL836281.1	Chr1_supercontig_000001869	660421639-660424377	660421639-660424377
GL836282.1	Chr1_supercontig_000001870	660424378-660426144	660424378-660426144
GL836283.1	Chr1_supercontig_000001871	660426145-660430876	660426145-660430876
GL836284.1	Chr1_supercontig_000001872	660430877-660432677	660430877-660432677
GL836285.1	Chr1_supercontig_000001873	660432678-660434467	660432678-660434467
GL836286.1	Chr1_supercontig_000001874	660434468-660436099	660434468-660436099
GL836287.1	Chr1_supercontig_000001875	660436100-660438734	660436100-660438734
GL836288.1	Chr1_supercontig_000001876	660438735-660441825	660438735-660441825
GL836289.1	Chr1_supercontig_000001877	660441826-660444016	660441826-660444016
GL836290.1	Chr1_supercontig_000001878	660444017-660447159	660444017-660447159
GL836291.1	Chr1_supercontig_000001879	660447160-660448676	660447160-660448676
GL836292.1	Chr1_supercontig_000001880	660448677-660451533	660448677-660451533
GL836293.1	Chr1_supercontig_000001881	660451534-660453035	660451534-660453035
GL836294.1	Chr1_supercontig_000001882	660453036-660456893	660453036-660456893
GL836295.1	Chr1_supercontig_000001883	660456894-660459379	660456894-660459379
GL836296.1	Chr1_supercontig_000001884	660459380-660461910	660459380-660461910
GL836297.1	Chr1_supercontig_000001885	660461911-660464479	660461911-660464479
GL836298.1	Chr1_supercontig_000001886	660464480-660466053	660464480-660466053
GL836299.1	Chr1_supercontig_000001887	660466054-660469018	660466054-660469018
GL836300.1	Chr1_supercontig_000001888	660469019-660471600	660469019-660471600
GL836301.1	Chr1_supercontig_000001889	660471601-660473395	660471601-660473395
GL836302.1	Chr1_supercontig_000001890	660473396-660476592	660473396-660476592
GL836303.1	Chr1_supercontig_000001891	660476593-660478105	660476593-660478105
GL836304.1	Chr1_supercontig_000001892	660478106-660479702	660478106-660479702
GL836305.1	Chr1_supercontig_000001893	660479703-660481730	660479703-660481730
GL836306.1	Chr1_supercontig_000001894	660481731-660483518	660481731-660483518
GL836307.1	Chr1_supercontig_000001895	660483519-660485182	660483519-660485182
GL836308.1	Chr1_supercontig_000001896	660485183-660486792	660485183-660486792
GL836309.1	Chr1_supercontig_000001897	660486793-660488901	660486793-660488901
GL836310.1	Chr1_supercontig_000001898	660488902-660490552	660488902-660490552
GL836311.1	Chr1_supercontig_000001899	660490553-660492606	660490553-660492606
GL836312.1	Chr1_supercontig_000001900	660492607-660496090	660492607-660496090
GL836313.1	Chr1_supercontig_000001901	660496091-660501182	660496091-660501182
GL836314.1	Chr1_supercontig_000001902	660501183-660503137	660501183-660503137
GL836315.1	Chr1_supercontig_000001903	660503138-660505509	660503138-660505509
GL836316.1	Chr1_supercontig_000001904	660505510-660507336	660505510-660507336
GL836317.1	Chr1_supercontig_000001905	660507337-660510102	660507337-660510102
GL836318.1	Chr1_supercontig_000001906	660510103-660512982	660510103-660512982
GL836319.1	Chr1_supercontig_000001907	660512983-660515288	660512983-660515288
GL836320.1	Chr1_supercontig_000001908	660515289-660519898	660515289-660519898
GL836321.1	Chr1_supercontig_000001909	660519899-660521453	660519899-660521453
GL836322.1	Chr1_supercontig_000001910	660521454-660523647	660521454-660523647
GL836323.1	Chr1_supercontig_000001911	660523648-660532864	660523648-660532864
GL836324.1	Chr1_supercontig_000001912	660532865-660539554	660532865-660539554
GL836325.1	Chr1_supercontig_000001913	660539555-660554025	660539555-660554025
GL836326.1	Chr1_supercontig_000001914	660554026-660560835	660554026-660560835
GL836327.1	Chr1_supercontig_000001915	660560836-660566793	660560836-660566793
GL836328.1	Chr1_supercontig_000001916	660566794-660579809	660566794-660579809
GL836329.1	Chr1_supercontig_000001917	660579810-660600482	660579810-660600482
GL836330.1	Chr1_supercontig_000001918	660600483-660626757	660600483-660626757
GL836331.1	Chr1_supercontig_000001919	660626758-660630182	660626758-660630182
GL836332.1	Chr1_supercontig_000001920	660630183-660632798	660630183-660632798
GL836333.1	Chr1_supercontig_000001921	660632799-660638730	660632799-660638730
GL836334.1	Chr1_supercontig_000001922	660638731-660640354	660638731-660640354
GL836335.1	Chr1_supercontig_000001923	660640355-660643156	660640355-660643156
GL836336.1	Chr1_supercontig_000001924	660643157-660644737	660643157-660644737
GL836337.1	Chr1_supercontig_000001925	660644738-660647047	660644738-660647047
GL836338.1	Chr1_supercontig_000001926	660647048-660649897	660647048-660649897
GL836339.1	Chr1_supercontig_000001927	660649898-660653288	660649898-660653288
GL836340.1	Chr1_supercontig_000001928	660653289-660655194	660653289-660655194
GL836341.1	Chr1_supercontig_000001929	660655195-660670650	660655195-660670650
GL836342.1	Chr1_supercontig_000001930	660670651-660673006	660670651-660673006
GL836343.1	Chr1_supercontig_000001931	660673007-660686725	660673007-660686725
GL836344.1	Chr1_supercontig_000001932	660686726-660691793	660686726-660691793
GL836345.1	Chr1_supercontig_000001933	660691794-660694175	660691794-660694175
GL836346.1	Chr1_supercontig_000001934	660694176-660695765	660694176-660695765
GL836347.1	Chr1_supercontig_000001935	660695766-660697672	660695766-660697672
GL836348.1	Chr1_supercontig_000001936	660697673-660699237	660697673-660699237
GL836349.1	Chr1_supercontig_000001937	660699238-660702932	660699238-660702932
GL836350.1	Chr1_supercontig_000001938	660702933-660709230	660702933-660709230
GL836351.1	Chr1_supercontig_000001939	660709231-660711186	660709231-660711186
GL836352.1	Chr1_supercontig_000001940	660711187-660712822	660711187-660712822
GL836353.1	Chr1_supercontig_000001941	660712823-660714940	660712823-660714940
GL836354.1	Chr1_supercontig_000001942	660714941-660716500	660714941-660716500
GL836355.1	Chr1_supercontig_000001943	660716501-660718125	660716501-660718125
GL836356.1	Chr1_supercontig_000001944	660718126-660720249	660718126-660720249
GL836357.1	Chr1_supercontig_000001945	660720250-660723006	660720250-660723006
GL836358.1	Chr1_supercontig_000001946	660723007-660726973	660723007-660726973
GL836359.1	Chr1_supercontig_000001947	660726974-660728736	660726974-660728736
GL836360.1	Chr1_supercontig_000001948	660728737-660730460	660728737-660730460
GL836361.1	Chr1_supercontig_000001949	660730461-660732041	660730461-660732041
GL836362.1	Chr1_supercontig_000001950	660732042-660733606	660732042-660733606
GL836363.1	Chr1_supercontig_000001951	660733607-660735561	660733607-660735561
GL836364.1	Chr1_supercontig_000001952	660735562-660737375	660735562-660737375
GL836365.1	Chr1_supercontig_000001953	660737376-660739046	660737376-660739046
GL836366.1	Chr1_supercontig_000001954	660739047-660746163	660739047-660746163
GL836367.1	Chr1_supercontig_000001955	660746164-660748307	660746164-660748307
GL836368.1	Chr1_supercontig_000001956	660748308-660750041	660748308-660750041
GL836369.1	Chr1_supercontig_000001957	660750042-660753289	660750042-660753289
GL836370.1	Chr1_supercontig_000001958	660753290-660755747	660753290-660755747
GL836371.1	Chr1_supercontig_000001959	660755748-660757271	660755748-660757271
GL836372.1	Chr1_supercontig_000001960	660757272-660760632	660757272-660760632
GL836373.1	Chr1_supercontig_000001961	660760633-660767740	660760633-660767740
GL836374.1	Chr1_supercontig_000001962	660767741-660781574	660767741-660781574
GL836375.1	Chr1_supercontig_000001963	660781575-660793981	660781575-660793981
GL836376.1	Chr1_supercontig_000001964	660793982-660798259	660793982-660798259
GL836377.1	Chr1_supercontig_000001965	660798260-660801288	660798260-660801288
GL836378.1	Chr1_supercontig_000001966	660801289-660803352	660801289-660803352
GL836379.1	Chr1_supercontig_000001967	660803353-660805678	660803353-660805678
GL836380.1	Chr1_supercontig_000001968	660805679-660809224	660805679-660809224
GL836381.1	Chr1_supercontig_000001969	660809225-660811397	660809225-660811397
GL836382.1	Chr1_supercontig_000001970	660811398-660814615	660811398-660814615
GL836383.1	Chr1_supercontig_000001971	660814616-660817054	660814616-660817054
GL836384.1	Chr1_supercontig_000001972	660817055-660818606	660817055-660818606
GL836385.1	Chr1_supercontig_000001973	660818607-660823236	660818607-660823236
GL836386.1	Chr1_supercontig_000001974	660823237-660825327	660823237-660825327
GL836387.1	Chr1_supercontig_000001975	660825328-660827695	660825328-660827695
GL836388.1	Chr1_supercontig_000001976	660827696-660831425	660827696-660831425
GL836389.1	Chr1_supercontig_000001977	660831426-660837500	660831426-660837500
GL836390.1	Chr1_supercontig_000001978	660837501-660839535	660837501-660839535
GL836391.1	Chr1_supercontig_000001979	660839536-660841159	660839536-660841159
GL836392.1	Chr1_supercontig_000001980	660841160-660844309	660841160-660844309
GL836393.1	Chr1_supercontig_000001981	660844310-660845824	660844310-660845824
GL836394.1	Chr1_supercontig_000001982	660845825-660847574	660845825-660847574
GL836395.1	Chr1_supercontig_000001983	660847575-660849132	660847575-660849132
GL836396.1	Chr1_supercontig_000001984	660849133-660850975	660849133-660850975
GL836397.1	Chr1_supercontig_000001985	660850976-660852537	660850976-660852537
GL836398.1	Chr1_supercontig_000001986	660852538-660854204	660852538-660854204
GL836399.1	Chr1_supercontig_000001987	660854205-660855823	660854205-660855823
GL836400.1	Chr1_supercontig_000001988	660855824-660858498	660855824-660858498
GL836401.1	Chr1_supercontig_000001989	660858499-660860845	660858499-660860845
GL836402.1	Chr1_supercontig_000001990	660860846-660872198	660860846-660872198
GL836403.1	Chr1_supercontig_000001991	660872199-660877902	660872199-660877902
GL836404.1	Chr1_supercontig_000001992	660877903-660891909	660877903-660891909
GL836405.1	Chr1_supercontig_000001993	660891910-660893740	660891910-660893740
GL836406.1	Chr1_supercontig_000001994	660893741-660896805	660893741-660896805
GL836407.1	Chr1_supercontig_000001995	660896806-660898602	660896806-660898602
GL836408.1	Chr1_supercontig_000001996	660898603-660903774	660898603-660903774
GL836409.1	Chr1_supercontig_000001997	660903775-660907679	660903775-660907679
GL836410.1	Chr1_supercontig_000001998	660907680-660922149	660907680-660922149
[truncated: 33,975 more rows]
